# Supplementary material for: The Potential Mechanism of Wuwei Qingzhuo San against Hyperlipidemia Based on TCM Network Pharmacology and Validation Experiments in Hyperlipidemia Hamster
Source: Evid Based Complement Alternat Med. 2020 May 10;2020:5369025. doi: 10.1155/2020/5369025 (PMC7212318; doi:10.1155/2020/5369025)
Supplement: Supplementary Materials — include the following. Supplementary Table 1: information of compounds from five herbal medicines in WWQZS collected from public data resources and Information of candidate compounds of five herbal medicines in WWQZS after screening. Supplementary Table 2: the details of targets from compounds in Shiliu, Honghua, Bibo, Doukou, and Rougui. Supplementary Table 3: known hyperlipidemia-related targets. WWQZS shared 43 potential targets with known anti-hyperlipidemia targets. Supplementary Table 4: the degrees and betweennesses of nodes in 45 candidate targets network. Supplementary Table 5: the BP, MF, and CC enrichment analyses for targets of WWQZS against hyperlipidemia. Supplementary Table 6: the KEGG pathways enrichment analysis for targets of WWQZS against hyperlipidemia. [file 5369025.f1.zip]

Archive with 6 entries (6 files):
- 5369025.f1/supplement table 1.xlsx
- 5369025.f1/supplement table 2.xlsx
- 5369025.f1/supplement table 3.xlsx
- 5369025.f1/supplement table 4.xlsx
- 5369025.f1/supplement table 5.xlsx
- 5369025.f1/supplement table 6.xlsx
