# Supplementary material for: The Potential Mechanism of Wuwei Qingzhuo San against Hyperlipidemia Based on TCM Network Pharmacology and Validation Experiments in Hyperlipidemia Hamster
Source: Evid Based Complement Alternat Med. 2020 May 10;2020:5369025. doi: 10.1155/2020/5369025 (PMC7212318; doi:10.1155/2020/5369025)
Supplement: Supplementary Materials — include the following. Supplementary Table 1: information of compounds from five herbal medicines in WWQZS collected from public data resources and Information of candidate compounds of five herbal medicines in WWQZS after screening. Supplementary Table 2: the details of targets from compounds in Shiliu, Honghua, Bibo, Doukou, and Rougui. Supplementary Table 3: known hyperlipidemia-related targets. WWQZS shared 43 potential targets with known anti-hyperlipidemia targets. Supplementary Table 4: the degrees and betweennesses of nodes in 45 candidate targets network. Supplementary Table 5: the BP, MF, and CC enrichment analyses for targets of WWQZS against hyperlipidemia. Supplementary Table 6: the KEGG pathways enrichment analysis for targets of WWQZS against hyperlipidemia. [file 5369025.f1.zip › 5369025.f1/supplement table 1.xlsx]

## Sheet: collected compounds
Information of compounds from five herbal medicines in WWQZS collected from public data resources
Herbal Source	MOL ID	Molecule Name	OB	Drug-likeness	Inchikey	PubChem Cid
Granati Fructus(Shiliu)	MOL000003	MTL	17.7345	0.033683	FBPFZTCFMRRESA-KVTDHHQDSA-N	6251
Granati Fructus(Shiliu)	MOL000006	luteolin	36.1626	0.24552	IQPNAANSBPBGFQ-UHFFFAOYSA-N	5280445
Granati Fructus(Shiliu)	MOL000098	quercetin	46.4333	0.27525	REFJWTPEDVJJIY-UHFFFAOYSA-N	5280343
Granati Fructus(Shiliu)	MOL000263	oleanolic acid	29.0208	0.75599	MIJYXULNPSFWEK-GTOFXWBISA-N	10494
Granati Fructus(Shiliu)	MOL000358	beta-sitosterol	36.9139	0.75123	KZJWDPNRJALLNS-VJSFXXLFSA-N	222284
Granati Fructus(Shiliu)	MOL000422	kaempferol	41.8822	0.24066	IYRMWMYZSQPJKC-UHFFFAOYSA-N	5280863
Granati Fructus(Shiliu)	MOL000437	Hirsutrin	1.85808	0.76904	OVSQVDMCBVZWGM-QSOFNFLRSA-N	5280804
Granati Fructus(Shiliu)	MOL000492	(+)-catechin	54.8264	0.24164	PFTAWBLQPZVEMU-DZGCQCFKSA-N	9064
Granati Fructus(Shiliu)	MOL000511	ursolic acid	16.7749	0.75457	WCGUUGGRBIKTOS-GPOJBZKASA-N	64945
Granati Fructus(Shiliu)	MOL000513	3,4,5-trihydroxybenzoic acid	31.6913	0.044562	LNTHITQWFMADLM-UHFFFAOYSA-N	370
Granati Fructus(Shiliu)	MOL000561	Astragalin	14.0268	0.73616	JPUKWEQWGBDDQB-QSOFNFLRSA-N	5282102
Granati Fructus(Shiliu)	MOL001002	ellagic acid	43.0646	0.43417	AFSDNFLWKVMVRB-UHFFFAOYSA-N	0
Granati Fructus(Shiliu)	MOL001717	PELTATIN B	24.0724	0.86507	HLBPOYVRLSXWJJ-PDSMFRHLSA-N	92122
Granati Fructus(Shiliu)	MOL001906	Methylgallate	30.9079	0.051049	FBSFWRHWHYMIOG-UHFFFAOYSA-N	7428
Granati Fructus(Shiliu)	MOL002077	1-[(2S)-2-piperidyl]acetone	53.8629	0.021408	JEIZLWNUBXHADF-QMMMGPOBSA-N	10313185
Granati Fructus(Shiliu)	MOL005079	corilagin	3.01372	0.4449	TUSDEZXZIZRFGC-XIGLUPEJSA-N	0
Granati Fructus(Shiliu)	MOL006789	Gallic acid-3-O-(6'-O-galloyl)glucoside	2.81299	0.67449	NRQUZRZEYPSZEY-WRMYNCHHSA-N	11972353
Granati Fructus(Shiliu)	MOL009146	punicalagin	18.166	0.0025859	ZJVUMAFASBFUBG-RILGRMFESA-N	0
Granati Fructus(Shiliu)	MOL009269	luteolin 7-O-glycoside	2.68223	0.78	PEFNSGRTCBGNAN-JFHUYLGKSA-N	0
Granati Fructus(Shiliu)	MOL009270	officinalisin	11.2285	0.12305	SMNKEUVRHNWHAI-LXUNUROVSA-N	0
Granati Fructus(Shiliu)	MOL009271	09762_FLUKA	43.6355	0.041811	RHWSKVCZXBAWLZ-OCAPTIKFSA-N	6602484
Granati Fructus(Shiliu)	MOL009272	Punicalin	16.3659	0.031488	IQHIEHIKNWLKFB-ITTSEVFZSA-N	0
Granati Fructus(Shiliu)	MOL009273	1-Methyl-3-isopropoxy cyclohexane	39.6789	0.026228	LXJQGSJHOKQAPO-VHSXEESVSA-N	0
Granati Fructus(Shiliu)	MOL009274	Fritillaziebinol	55.0465	0.33853	BOHSULPVIZQJSM-URTLRTLISA-N	0
Granati Fructus(Shiliu)	MOL009275	casuarinin	31.5261	0.061199	MMQXBTULXAEKQE-NXROWURCSA-N	0
Granati Fructus(Shiliu)	MOL009276	granatin B	85.9053	0.01705	FFNTWLBZRJZJEJ-VIUILRJOSA-N	0
Granati Fructus(Shiliu)	MOL000012	Arachic acid	16.6564	0.19499	VKOBVWXKNCXXDE-UHFFFAOYSA-N	10467
Granati Fructus(Shiliu)	MOL000053	Methose	1.67736	0.034399	BJHIKXHVCXFQLS-UYFOZJQFSA-N	5984
Granati Fructus(Shiliu)	MOL000069	palmitic acid	19.2966	0.098573	IPCSVZSSVZVIGE-UHFFFAOYSA-N	985
Granati Fructus(Shiliu)	MOL000105	protocatechuic acid	25.3665	0.035092	YQUVCSBJEUQKSH-UHFFFAOYSA-N	72
Granati Fructus(Shiliu)	MOL000131	EIC	41.9044	0.14347	OYHQOLUKZRVURQ-HZJYTTRNSA-N	5280450
Granati Fructus(Shiliu)	MOL000382	Arabinose,d	1.87148	0.022118	PYMYPHUHKUWMLA-WDCZJNDASA-N	66308
Granati Fructus(Shiliu)	MOL000399	Docosanoate	15.6884	0.26054	UKMSUNONTOPOIO-UHFFFAOYSA-N	8215
Granati Fructus(Shiliu)	MOL000414	Caffeate	54.9705	0.050036	QAIPRVGONGVQAS-RQOWECAXSA-N	1549111
Granati Fructus(Shiliu)	MOL000415	rutin	3.20153	0.68283	IKGXIBQEEMLURG-NVPNHPEKSA-N	5280805
Granati Fructus(Shiliu)	MOL000420	XLS	51.0764	0.022107	PYMYPHUHKUWMLA-VPENINKCSA-N	644160
Granati Fructus(Shiliu)	MOL000432	linolenic acid	45.0091	0.14709	DTOSIQBPPRVQHS-PDBXOOCHSA-N	5280934
Granati Fructus(Shiliu)	MOL000661	PENTACOSANOIC ACID	14.5683	0.37011	MWMPEAHGUXCSMY-UHFFFAOYSA-N	10468
Granati Fructus(Shiliu)	MOL000663	lignoceric acid	14.9036	0.33352	QZZGJDVWLFXDLK-UHFFFAOYSA-N	11197
Granati Fructus(Shiliu)	MOL000666	hexanal	55.707	0.0055795	JARKCYVAAOWBJS-UHFFFAOYSA-N	6184
Granati Fructus(Shiliu)	MOL000667	1-hexanol	22.043	0.0054272	ZSIAUFGUXNUGDI-UHFFFAOYSA-N	8103
Granati Fructus(Shiliu)	MOL000708	WLN: VHR	32.628	0.014163	HUMNYLRZRPPJDN-UHFFFAOYSA-N	240
Granati Fructus(Shiliu)	MOL000749	Linoleic	41.9044	0.14468	OYHQOLUKZRVURQ-AVQMFFATSA-N	5282457
Granati Fructus(Shiliu)	MOL000860	stearic acid	17.8254	0.14086	QIQXTHQIDYTFRH-UHFFFAOYSA-N	5281
Granati Fructus(Shiliu)	MOL000935	Hepanal	53.8332	0.10397	SPCXZDDGSGTVAW-XIDUGBJDSA-N	15560276
Granati Fructus(Shiliu)	MOL001300	PEL	44.0342	0.017357	WRMNZCZEMHIOCP-UHFFFAOYSA-N	6054
Granati Fructus(Shiliu)	MOL001308	oleic acid	33.1284	0.14262	ZQPPMHVWECSIRJ-MDZDMXLPSA-N	637517
Granati Fructus(Shiliu)	MOL001393	myristic acid	21.1812	0.066784	TUNFSRHWOTWDNC-UHFFFAOYSA-N	11005
Granati Fructus(Shiliu)	MOL001396	PENTADECYLIC ACID	20.1846	0.081479	WQEPLUUGTLDZJY-UHFFFAOYSA-N	13849
Granati Fructus(Shiliu)	MOL001456	citric acid	56.2199	0.047066	KRKNYBCHXYNGOX-UHFFFAOYSA-N	19782904
Granati Fructus(Shiliu)	MOL001501	Daturic acid	18.5106	0.11827	KEMQGTRYUADPNZ-UHFFFAOYSA-N	10465
Granati Fructus(Shiliu)	MOL001578	Hypnon	48.1926	0.018645	KWOLFJPFCHCOCG-UHFFFAOYSA-N	7410
Granati Fructus(Shiliu)	MOL001691	vitamin c	13.3435	0.043187	CIWBSHSKHKDKBQ-JLAZNSOCSA-N	54670067
Granati Fructus(Shiliu)	MOL001880	OXL	29.6784	0.0071888	MUBZPKHOEPUJKR-UHFFFAOYSA-N	18676629
Granati Fructus(Shiliu)	MOL001993	TRICOSANOIC ACID	15.2918	0.29705	XEZVDURJDFGERA-UHFFFAOYSA-N	17085
Granati Fructus(Shiliu)	MOL002046	hexanoic acid	73.0752	0.0090082	FUZZWVXGSFPDMH-UHFFFAOYSA-N	8892
Granati Fructus(Shiliu)	MOL002092	Antioxidant No. 33	26.743	0.062536	ICKWICRCANNIBI-UHFFFAOYSA-N	7311
Granati Fructus(Shiliu)	MOL002175	3-cyclohexen-1-ol	70.5667	0.010157	ABZZOPIABWYXSN-ZCFIWIBFSA-N	12532693
Granati Fructus(Shiliu)	MOL002496	Sulcatone	26.3591	0.012095	UHEPJGULSIKKTP-UHFFFAOYSA-N	9862
Granati Fructus(Shiliu)	MOL002682	aldehydo-D-galactose	47.8145	0.034584	GZCGUPFRVQAUEE-KCDKBNATSA-N	3037556
Granati Fructus(Shiliu)	MOL002683	Ligla	45.0091	0.14562	VZCCETWTMQHEPK-QNEBEIHSSA-N	5280933
Granati Fructus(Shiliu)	MOL002830	PCR	51.9864	0.014696	IWDCLRJOBJJRNH-UHFFFAOYSA-N	2879
Granati Fructus(Shiliu)	MOL002850	butylated hydroxytoluene	40.0203	0.071985	NLZUEZXRPGMBCV-UHFFFAOYSA-N	31404
Granati Fructus(Shiliu)	MOL003083	ETHYL FURAN	55.0732	0.0093444	HLPIHRDZBHXTFJ-UHFFFAOYSA-N	18554
Granati Fructus(Shiliu)	MOL003395	(3S,8S,9S,10R,13R,14S,17R)-17-[(1R,4R)-1,4-dimethylhexyl]-10,13-dimethyl-2,3,4,7,8,9,11,12,14,15,16,17-dodecahydro-1H-cyclopenta[a]phenanthren-3-ol	11.3264	0.67309	BUFUFDXBXMUAJU-YSQMORBQSA-N	21670847
Granati Fructus(Shiliu)	MOL004320	MEK	62.5029	0.0027784	ZWEHNKRNPOVVGH-UHFFFAOYSA-N	6569
Granati Fructus(Shiliu)	MOL004800	pelargonidin-3-O-glucoside	38.716	0.71362	FMGSJXMXTCFPGR-GQUPQBGVSA-N	0
Granati Fructus(Shiliu)	MOL004807	glucuronic acid	46.1828	0.055111	AEMOLEFTQBMNLQ-QIUUJYRFSA-N	441478
Granati Fructus(Shiliu)	MOL005722	ZINC00395662	51.9206	0.013573	ROTONRWJLXYJBD-LURJTMIESA-N	6950811
Granati Fructus(Shiliu)	MOL005858	3,7,8-Tri-O-methylellagic acid	37.5422	0.57278	LXEQIOGTMDLLEC-UHFFFAOYSA-N	0
Granati Fructus(Shiliu)	MOL005971	Nonadecylic acid	17.2084	0.16641	ISYWECDDZWTKFF-UHFFFAOYSA-N	12591
Granati Fructus(Shiliu)	MOL006505	(-)-epicatechin	28.9348	0.24163	PFTAWBLQPZVEMU-UKRRQHHQSA-N	72276
Granati Fructus(Shiliu)	MOL008001	3-hexenal	50.335	0.0057742	GXANMBISFKBPEX-ONEGZZNKSA-N	643139
Granati Fructus(Shiliu)	MOL008401	Henicosanoic acid	16.1425	0.22694	CKDDRHZIAZRDBW-UHFFFAOYSA-N	16898
Granati Fructus(Shiliu)	MOL008494	3,3'-Di-O-methylellagic acid	23.5315	0.52537	KLAGYIBJNXLDTL-UHFFFAOYSA-N	0
Granati Fructus(Shiliu)	MOL011039	Vaccenic acid	33.1284	0.14284	UWHZIFQPPBDJPM-BQYQJAHWSA-N	5281127
Carthami Flos (Honghua)	MOL000006	luteolin	36.1626	0.24552	IQPNAANSBPBGFQ-UHFFFAOYSA-N	5280445
Carthami Flos (Honghua)	MOL000008	apigenin	23.0622	0.21306	KZNIFHPLKGYRTM-UHFFFAOYSA-N	5280443
Carthami Flos (Honghua)	MOL000012	Arachic acid	16.6564	0.19499	VKOBVWXKNCXXDE-UHFFFAOYSA-N	10467
Carthami Flos (Honghua)	MOL000024	alpha-humulene	22.9768	0.061124	FAMPSKZZVDUYOS-HRGUGZIWSA-N	5281520
Carthami Flos (Honghua)	MOL000036	beta-caryophyllene	29.7023	0.089893	NPNUFJAVOOONJE-GFUGXAQUSA-N	5281515
Carthami Flos (Honghua)	MOL000055	L-Lysin	29.3326	0.018179	KDXKERNSBIXSRK-YFKPBYRVSA-N	5962
Carthami Flos (Honghua)	MOL000069	palmitic acid	19.2966	0.098573	IPCSVZSSVZVIGE-UHFFFAOYSA-N	985
Carthami Flos (Honghua)	MOL000089	catechol	29.8607	0.01616	YCIMNLLNPGFGHC-UHFFFAOYSA-N	289
Carthami Flos (Honghua)	MOL000098	quercetin	46.4333	0.27525	REFJWTPEDVJJIY-UHFFFAOYSA-N	5280343
Carthami Flos (Honghua)	MOL000116	Nonanal	40.2763	0.015196	GYHFUZHODSMOHU-UHFFFAOYSA-N	31289
Carthami Flos (Honghua)	MOL000121	Decanal	29.8051	0.020124	KSMVZQYAVGTKIV-UHFFFAOYSA-N	8175
Carthami Flos (Honghua)	MOL000131	EIC	41.9044	0.14347	OYHQOLUKZRVURQ-HZJYTTRNSA-N	5280450
Carthami Flos (Honghua)	MOL000222	terephthaldehyde	11.9327	0.32639	CWVRJTMFETXNAD-BBDSCLQGSA-N	7067335
Carthami Flos (Honghua)	MOL000223	caffeic acid	25.7644	0.050089	QAIPRVGONGVQAS-DUXPYHPUSA-N	689043
Carthami Flos (Honghua)	MOL000249	Methylcinnamate	18.4175	0.035378	CCRCUPLGCSFEDV-BQYQJAHWSA-N	637520
Carthami Flos (Honghua)	MOL000286	β-amyrin acetate	9.10739	0.74014	UMRPOGLIBDXFNK-OAPBINRDSA-N	51398127
Carthami Flos (Honghua)	MOL000305	lauric acid	23.5879	0.043637	POULHZVOKOAJMA-UHFFFAOYSA-N	3893
Carthami Flos (Honghua)	MOL000340	HCI	35.8319	0.028973	XMIIGOLPHOKFCH-UHFFFAOYSA-N	107
Carthami Flos (Honghua)	MOL000346	succinic acid	29.6203	0.012082	KDYFGRWQOYBRFD-UHFFFAOYSA-N	21952380
Carthami Flos (Honghua)	MOL000347	Syrigin	14.6369	0.32496	QJVXKWHHAMZTBY-GCPOEHJPSA-N	5316860
Carthami Flos (Honghua)	MOL000348	4-[(Z)-3-hydroxyprop-1-enyl]-2,6-dimethoxyphenol	49.1473	0.064947	LZFOPEXOUVTGJS-ARJAWSKDSA-N	10130521
Carthami Flos (Honghua)	MOL000356	lupeol	12.1208	0.77716	MQYXUWHLBZFQQO-QGTGJCAVSA-N	259846
Carthami Flos (Honghua)	MOL000357	Sitogluside	20.6319	0.6241	NPJICTMALKLTFW-OFUAXYCQSA-N	5742590
Carthami Flos (Honghua)	MOL000358	beta-sitosterol	36.9139	0.75123	KZJWDPNRJALLNS-VJSFXXLFSA-N	222284
Carthami Flos (Honghua)	MOL000360	FER	39.5585	0.058069	KSEBMYQBYZTDHS-HWKANZROSA-N	445858
Carthami Flos (Honghua)	MOL000382	Arabinose,d	1.87148	0.022118	PYMYPHUHKUWMLA-WDCZJNDASA-N	66308
Carthami Flos (Honghua)	MOL000396	(+)-Syringaresinol	3.29171	0.72244	KOWMJRJXZMEZLD-HCIHMXRSSA-N	443023
Carthami Flos (Honghua)	MOL000415	rutin	3.20153	0.68283	IKGXIBQEEMLURG-NVPNHPEKSA-N	5280805
Carthami Flos (Honghua)	MOL000422	kaempferol	41.8822	0.24066	IYRMWMYZSQPJKC-UHFFFAOYSA-N	5280863
Carthami Flos (Honghua)	MOL000432	linolenic acid	45.0091	0.14709	DTOSIQBPPRVQHS-PDBXOOCHSA-N	5280934
Carthami Flos (Honghua)	MOL000449	Stigmasterol	43.8299	0.75665	HCXVJBMSMIARIN-PHZDYDNGSA-N	5280794
Carthami Flos (Honghua)	MOL000479	Farnesene	17.4181	0.047569	JSNRRGGBADWTMC-NTCAYCPXSA-N	5281517
Carthami Flos (Honghua)	MOL000514	Nonacosane	8.1241	0.39372	IGGUPRCHHJZPBS-UHFFFAOYSA-N	12409
Carthami Flos (Honghua)	MOL000561	Astragalin	14.0268	0.73616	JPUKWEQWGBDDQB-QSOFNFLRSA-N	5282102
Carthami Flos (Honghua)	MOL000608	()-Terpinen-4-ol	81.4067	0.032323	WRYLYDPHFGVWKC-SNVBAGLBSA-N	2724161
Carthami Flos (Honghua)	MOL000612	(-)-alpha-cedrene	55.561	0.10498	IRAQOCYXUMOFCW-OSFYFWSMSA-N	0
Carthami Flos (Honghua)	MOL000675	oleic acid	33.1284	0.14243	ZQPPMHVWECSIRJ-KTKRTIGZSA-N	445639
Carthami Flos (Honghua)	MOL000714	Hyacinthin	38.6465	0.017812	DTUQWGWMVIHBKE-UHFFFAOYSA-N	998
Carthami Flos (Honghua)	MOL000723	trans-2,4-decadienal	51.0282	0.020894	JZQKTMZYLHNFPL-BLHCBFLLSA-N	5283349
Carthami Flos (Honghua)	MOL000748	HMF	45.0661	0.019427	NOEGNKMFWQHSLB-UHFFFAOYSA-N	237332
Carthami Flos (Honghua)	MOL000767	Dotriacontanol	10.2452	0.45938	QOEHNLSDMADWEF-UHFFFAOYSA-N	96117
Carthami Flos (Honghua)	MOL000775	EEE	45.0163	0.0045272	XEKOWRVHYACXOJ-UHFFFAOYSA-N	8857
Carthami Flos (Honghua)	MOL000860	stearic acid	17.8254	0.14086	QIQXTHQIDYTFRH-UHFFFAOYSA-N	5281
Carthami Flos (Honghua)	MOL000953	CLR	37.8739	0.67677	HVYWMOMLDIMFJA-DPAQBDIFSA-N	5997
Carthami Flos (Honghua)	MOL001097	o-xylene	45.547	0.014755	CTQNGGLPUBDAKN-UHFFFAOYSA-N	7237
Carthami Flos (Honghua)	MOL001099	p-xylene	48.7427	0.014017	URLKBWYHVLBVBO-UHFFFAOYSA-N	7809
Carthami Flos (Honghua)	MOL001129	l-Verbenone	50.6606	0.061837	DCSCXTJOXBUFGB-JGVFFNPUSA-N	92874
Carthami Flos (Honghua)	MOL001281	L-alpha-Palmitin	26.66	0.22131	QHZLMUACJMDIAE-GOSISDBHSA-N	11359451
Carthami Flos (Honghua)	MOL001337	Benzyl glucopyranoside	12.3948	0.1428	GKHCBYYBLTXYEV-UJPOAAIJSA-N	188977
Carthami Flos (Honghua)	MOL001387	(7aS)-4,4,7a-trimethyl-6,7-dihydro-5H-benzofuran-2-one	36.8366	0.065044	IMKHDCBNRDRUEB-NSHDSACASA-N	157995
Carthami Flos (Honghua)	MOL001393	myristic acid	21.1812	0.066784	TUNFSRHWOTWDNC-UHFFFAOYSA-N	11005
Carthami Flos (Honghua)	MOL001396	PENTADECYLIC ACID	20.1846	0.081479	WQEPLUUGTLDZJY-UHFFFAOYSA-N	13849
Carthami Flos (Honghua)	MOL001398	Methyllinolenate	46.153	0.17063	DVWSXZIHSUZZKJ-YSTUJMKBSA-N	5319706
Carthami Flos (Honghua)	MOL001399	TWT	8.36569	0.17997	HOWGUJZVBDQJKV-UHFFFAOYSA-N	12405
Carthami Flos (Honghua)	MOL001402	Octacosane	8.14661	0.36732	ZYURHZPYMFLWSH-UHFFFAOYSA-N	12408
Carthami Flos (Honghua)	MOL001442	phytol	33.8244	0.13342	BOTWFXYSPFMFNR-PYDDKJGSSA-N	5280435
Carthami Flos (Honghua)	MOL001501	Daturic acid	18.5106	0.11827	KEMQGTRYUADPNZ-UHFFFAOYSA-N	10465
Carthami Flos (Honghua)	MOL001565	HEPTADECENE	20.0332	0.076039	ADOBXTDBFNCOBN-UHFFFAOYSA-N	23217
Carthami Flos (Honghua)	MOL001620	Pentadecene	17.7243	0.050176	PJLHTVIBELQURV-UHFFFAOYSA-N	25913
Carthami Flos (Honghua)	MOL001622	1-Tetradecene	6.14871	0.04011	HFDVRLIODXPAHB-UHFFFAOYSA-N	14260
Carthami Flos (Honghua)	MOL001640	NON	26.7381	0.027306	GHVNFZFCNZKVNT-UHFFFAOYSA-N	2969
Carthami Flos (Honghua)	MOL001695	Quercimeritrin (6CI,7CI,8CI)	2.84847	0.79299	BBFYUPYFXSSMNV-HMGRVEAOSA-N	5282160
Carthami Flos (Honghua)	MOL001739	zoomaric acid	35.7759	0.099334	SECPZKHBENQXJG-FPLPWBNLSA-N	445638
Carthami Flos (Honghua)	MOL001771	poriferast-5-en-3beta-ol	36.9139	0.75034	KZJWDPNRJALLNS-FBZNIEFRSA-N	457801
Carthami Flos (Honghua)	MOL001787	ADO	15.9823	0.17865	OIRDTQYFTABQOQ-KQYNXXCUSA-N	60961
Carthami Flos (Honghua)	MOL001788	adenine	62.8058	0.034822	GFFGJBXGBJISGV-UHFFFAOYSA-N	190
Carthami Flos (Honghua)	MOL001801	salicylic acid	32.127	0.027213	YGSDEFSMJLZEOE-UHFFFAOYSA-N	338
Carthami Flos (Honghua)	MOL001838	Dipalmitin	21.1626	0.44196	GFAZGHREJPXDMH-UHFFFAOYSA-N	68149
Carthami Flos (Honghua)	MOL001894	Bicetyl	8.0348	0.46175	QHMGJGNTMQDRQA-UHFFFAOYSA-N	11008
Carthami Flos (Honghua)	MOL001955	Heriguard	11.9327	0.32642	CWVRJTMFETXNAD-JUHZACGLSA-N	1794427
Carthami Flos (Honghua)	MOL002003	(-)-Caryophyllene oxide	32.6701	0.12925	NVEQFIOZRFFVFW-GUIRCDHDSA-N	0
Carthami Flos (Honghua)	MOL002008	myricetin	13.7483	0.31057	IKMDFBPHZNJCSN-UHFFFAOYSA-N	5281672
Carthami Flos (Honghua)	MOL002016	10579-93-8	27.3584	0.089902	NPNUFJAVOOONJE-BJLYVFBQSA-N	5452236
Carthami Flos (Honghua)	MOL002046	hexanoic acid	73.0752	0.0090082	FUZZWVXGSFPDMH-UHFFFAOYSA-N	8892
Carthami Flos (Honghua)	MOL002092	Antioxidant No. 33	26.743	0.062536	ICKWICRCANNIBI-UHFFFAOYSA-N	7311
Carthami Flos (Honghua)	MOL002363	beta-Ionone	20.6324	0.054165	PSQYTAPXSHCGMF-BQYQJAHWSA-N	638014
Carthami Flos (Honghua)	MOL002376	PENTACOSANE	8.24936	0.27262	YKNWIILGEFFOPE-UHFFFAOYSA-N	12406
Carthami Flos (Honghua)	MOL002674	(E)-1,3-Tridecadiene-5,7,9,11-tetrayne	37.3027	0.03797	PXQLZFYDZKYLPY-FNORWQNLSA-N	5352699
Carthami Flos (Honghua)	MOL002675	Hexenal	46.0108	0.0057353	MBDOYVRWFFCFHM-SNAWJCMRSA-N	5281168
Carthami Flos (Honghua)	MOL002676	10482-53-8	44.0575	0.07745	JXRNMQDTJAQLAQ-UTZXOHNXSA-N	5352710
Carthami Flos (Honghua)	MOL002677	L-1,2-Dipalmitin	21.2848	0.48761	JEJLGIQLPYYGEE-XIFFEERXSA-N	644078
Carthami Flos (Honghua)	MOL002678	EB	49.3833	0.012997	YNQLUTRBYVCPMQ-UHFFFAOYSA-N	7500
Carthami Flos (Honghua)	MOL002679	Ethone	40.8141	0.015351	GKASDNZWUGIAMG-UHFFFAOYSA-N	31214
Carthami Flos (Honghua)	MOL002680	Flavoxanthin	60.4129	0.55609	JRHJXXLCNATYLS-NGZWBNMCSA-N	5281238
Carthami Flos (Honghua)	MOL002681	fluoranthene	24.7036	0.18317	GVEPBJHOBDJJJI-UHFFFAOYSA-N	9154
Carthami Flos (Honghua)	MOL002682	aldehydo-D-galactose	47.8145	0.034584	GZCGUPFRVQAUEE-KCDKBNATSA-N	3037556
Carthami Flos (Honghua)	MOL002683	Ligla	45.0091	0.14562	VZCCETWTMQHEPK-QNEBEIHSSA-N	5280933
Carthami Flos (Honghua)	MOL002684	gamma-Tocotrienol	20.3049	0.53282	OTXNTMVVOOBZCV-WAZJVIJMSA-N	5282349
Carthami Flos (Honghua)	MOL002685	[(2S)-2,3-dihydroxypropyl] octanoate	22.2751	0.053548	GHBFNMLVSPCDGN-JTQLQIEISA-N	3085369
Carthami Flos (Honghua)	MOL002686	GLV	32.2456	0.0038016	HHLFWLYXYJOTON-UHFFFAOYSA-N	760
Carthami Flos (Honghua)	MOL002687	guanosine	21.4264	0.20543	NYHBQMYGNKIUIF-BDXYJKHTSA-N	12219153
Carthami Flos (Honghua)	MOL002688	hentriacontane-8,10-diol	13.4113	0.49844	DUCBDPSSCKLKQI-IOWSJCHKSA-N	0
Carthami Flos (Honghua)	MOL002689	3,4,5-Trimethoxytoluene	23.729	0.044897	KCIZTNZGSBSSRM-UHFFFAOYSA-N	80922
Carthami Flos (Honghua)	MOL002690	hydroxysafflor-yellow-A	4.77176	0.68407	IAVUBSCVWHLRGE-IHOOSGMISA-N	0
Carthami Flos (Honghua)	MOL002691	Iva	62.1684	0.0072034	GWYFCOCPABKNJV-UHFFFAOYSA-N	10430
Carthami Flos (Honghua)	MOL002692	Amoenin A3	3.32187	0.73616	JPUKWEQWGBDDQB-FHYQVQSVSA-N	5742687
Carthami Flos (Honghua)	MOL002693	nicotiflorin	3.63711	0.72565	RTATXGUCZHCSNG-QHWHWDPRSA-N	5318767
Carthami Flos (Honghua)	MOL002694	4-[(E)-4-(3,5-dimethoxy-4-oxo-1-cyclohexa-2,5-dienylidene)but-2-enylidene]-2,6-dimethoxycyclohexa-2,5-dien-1-one	48.4663	0.36494	KQTQOJWCKLPTGL-AATRIKPKSA-N	10237057
Carthami Flos (Honghua)	MOL002695	lignan	43.3182	0.65067	PEIBIXYUYBVLDS-LACYOAMESA-N	0
Carthami Flos (Honghua)	MOL002696	lirioresinol-A	1.75889	0.67322	CFGHJJXJFDPKOK-WGOZBUGNSA-N	0
Carthami Flos (Honghua)	MOL002697	junipene	44.0737	0.10826	PDSNLYSELAIEBU-ABHRYQDASA-N	0
Carthami Flos (Honghua)	MOL002698	lupeol-palmitate	33.9836	0.31954	BWXDHBQGBNPJMN-ZXPGYGAFSA-N	0
Carthami Flos (Honghua)	MOL002699	Cetene	5.33804	0.062078	GQEZCXVZFLOKMC-UHFFFAOYSA-N	12395
Carthami Flos (Honghua)	MOL002700	luteolin-7-0-B-D-glucoside	3.71769	0.75772	YSXNEFJASLJGTK-WPIPYYINSA-N	0
Carthami Flos (Honghua)	MOL002701	neocarthamin	17.8127	0.77017	UBFTZAGDGOMJQE-SACPXRHSSA-N	46173973
Carthami Flos (Honghua)	MOL002702	Nonacosanol	10.5694	0.43365	PKBSGDQYUYBUDY-UHFFFAOYSA-N	243696
Carthami Flos (Honghua)	MOL002703	OCTADECENE	19.2088	0.092277	CCCMONHAUSKTEQ-UHFFFAOYSA-N	8217
Carthami Flos (Honghua)	MOL002704	D-Phenylalanine	92.8603	0.036064	COLNVLDHVKWLRT-MRVPVSSYSA-N	6919011
Carthami Flos (Honghua)	MOL002705	phospholipid	15.4316	0.44805	XBFFDYOLNSBRPP-VJLHXPKFSA-N	0
Carthami Flos (Honghua)	MOL002706	Phytoene	39.5631	0.50463	YVLPJIGOMTXXLP-KEKOKYSKSA-N	5280784
Carthami Flos (Honghua)	MOL002707	phytofluene	43.1817	0.50316	OVSVTCFNLSGAMM-BBVOSDEVSA-N	0
Carthami Flos (Honghua)	MOL002708	precarthamin	21.9999	0.67405	TUMFKUPLGLZICX-GBWFKIPQSA-N	0
Carthami Flos (Honghua)	MOL002709	propanetriol-a-arabinofuranosyl(1→4)	0.870255	0.23926	RLRSVQWPALZGBG-QRQJNGMPSA-N	0
Carthami Flos (Honghua)	MOL002710	Pyrethrin II	48.3571	0.35025	VJFUPGQZSXIULQ-XIGJTORUSA-N	5281555
Carthami Flos (Honghua)	MOL002711	ZINC01692449	72.1822	0.0045211	VHVMXWZXFBOANQ-YFKPBYRVSA-N	6994331
Carthami Flos (Honghua)	MOL002712	6-Hydroxykaempferol	62.1327	0.27266	LFPHMXIOQBBTSS-UHFFFAOYSA-N	5281638
Carthami Flos (Honghua)	MOL002713	qt_Kaempferol-3-O-rutinoside-7-O-galactoside	14.2751	0.62527	AFMMVIHAIXUFCX-UFPKKEPASA-N	0
Carthami Flos (Honghua)	MOL002714	baicalein	33.5189	0.20888	FXNFHKRTJBSTCS-UHFFFAOYSA-N	5281605
Carthami Flos (Honghua)	MOL002715	qt_carthamin-precursor	6.8321	0.55452	DXJXGCUIWREUIM-IKFPMPLHSA-N	0
Carthami Flos (Honghua)	MOL002716	qt_carthamin	6.74999	0.5994	YVRRCWGGNZWGBW-BOABNMACSA-N	0
Carthami Flos (Honghua)	MOL002717	qt_carthamone	51.0258	0.20055	ZWTHNQBQIXDGOG-ZZXKWVIFSA-N	0
Carthami Flos (Honghua)	MOL002718	qt_hydroxysafflor-yellow-A	13.0224	0.19814	CKKZDWXXQHXDPG-JATDMLSLSA-N	0
Carthami Flos (Honghua)	MOL002719	6-Hydroxynaringenin	33.2292	0.24203	NPLTVGMLNDMOQE-NSHDSACASA-N	188308
Carthami Flos (Honghua)	MOL002720	qt_precarthamin	17.4787	0.23628	JKVBAUKHMKMYHU-OTDNITJGSA-N	0
Carthami Flos (Honghua)	MOL002721	quercetagetin	45.007	0.30991	ZVOLCUVKHLEPEV-UHFFFAOYSA-N	5281680
Carthami Flos (Honghua)	MOL002722	Vomifoliol	29.0142	0.08234	KPQMCAKZRXOZLB-KOIHBYQTSA-N	5280462
Carthami Flos (Honghua)	MOL002723	qt_safflomin-A	5.84703	0.19812	CKKZDWXXQHXDPG-XNFBASQJSA-N	0
Carthami Flos (Honghua)	MOL002724	qt_safflomin-C	3.52871	0.59242	MDIXVVOAPSODNZ-AWZJDSBOSA-N	0
Carthami Flos (Honghua)	MOL002725	qt_safflow-yellow-A	16.0661	0.78839	DWUQOTCDZPGDMU-YJXQOXISSA-N	0
Carthami Flos (Honghua)	MOL002726	qt_safflower-yellow-B	9.46821	0.41476	KISMLTVOQZLBKP-BIUVTSSESA-N	0
Carthami Flos (Honghua)	MOL002727	C08464	37.1415	0.039062	KKBHBCOJHHCOCL-UHFFFAOYSA-N	441552
Carthami Flos (Honghua)	MOL002728	sesquiterpene	5.85514	0.66886	BNSCASRSSGJHQH-BOWKGAMESA-N	13345443
Carthami Flos (Honghua)	MOL002729	quercetin-6-glucoside	16.7471	0.80252	OKJRTFAIFAZTSU-IWCNZLJZSA-N	0
Carthami Flos (Honghua)	MOL002730	Vitamin- G	6.78811	0.49961	AUNGANRZJHBGPY-SCRDCRAPSA-N	493570
Carthami Flos (Honghua)	MOL002731	(4S)-4-hydroxy-3,5,5-trimethyl-4-[(E,3R)-3-[(2R,3R,4S,5S,6R)-3,4,5-trihydroxy-6-(hydroxymethyl)tetrahydropyran-2-yl]oxybut-1-enyl]cyclohex-2-en-1-one	10.8094	0.36406	SWYRVCGNMNAFEK-MHXFFUGFSA-N	9930064
Carthami Flos (Honghua)	MOL002732	7-Chloro-2,4-quinolinedicarboxylic acid	33.3235	0.03715	AJWRNFIZKHPOHC-JEGFTUTRSA-N	5322029
Carthami Flos (Honghua)	MOL002733	safflomin-A	3.53172	0.68407	IAVUBSCVWHLRGE-KUURSSTCSA-N	0
Carthami Flos (Honghua)	MOL002734	safflomin-C	5.57002	0.65883	UCXUCVMTWJPTSS-DLLRSWEXSA-N	0
Carthami Flos (Honghua)	MOL002735	safflow-yellow-A	27.1638	0.69945	OLTYHTFFNVRCGW-AGJBHAAJSA-N	0
Carthami Flos (Honghua)	MOL002736	safflower-yellow-B	3.01372	0.16728	FKEOSXANZOSJMP-KWORDCDFSA-N	0
Carthami Flos (Honghua)	MOL002737	scutellarein	18.9736	0.24387	JVXZRQGOGOXCEC-UHFFFAOYSA-N	5281697
Carthami Flos (Honghua)	MOL002738	Diamylphenol	17.2556	0.079682	GKPNMUZVXNHWPX-UHFFFAOYSA-N	34303
Carthami Flos (Honghua)	MOL002739	tagetiin	28.3413	0.78102	YUANNBKEZDNSIV-MOAYUBPUSA-N	0
Carthami Flos (Honghua)	MOL002740	thymopentin	1.23747	0.45921	PSWFFKRAVBDQEG-HGUQERDASA-N	0
Carthami Flos (Honghua)	MOL002741	tinctorimine	18.0888	0.68271	POTCYQGSMSOOLE-HAECYMQHSA-N	0
Carthami Flos (Honghua)	MOL002742	LUT	15.7424	0.5393	KBPHJBAIARWVSC-NSIPBSJQSA-N	448437
Carthami Flos (Honghua)	MOL002743	ZINC01666986	43.94	0.0059229	QNVRIHYSUZMSGM-ZCFIWIBFSA-N	6993810
Carthami Flos (Honghua)	MOL002744	(R)-2-methylbutyric acid	28.8556	0.0079662	WLAMNBDJUVNPJU-SCSAIBSYSA-N	6950479
Carthami Flos (Honghua)	MOL002745	ZINC01690417	80.1217	0.006186	ZOCHHNOQQHDWHG-ZCFIWIBFSA-N	6994293
Carthami Flos (Honghua)	MOL002746	L-2-Amino-3-(5-hydroxyindolyl)propionic acid	74.6294	0.097646	LDCYZAJDBXYCGN-VIFPVBQESA-N	6971044
Carthami Flos (Honghua)	MOL002747	(2R)-5-methylhexan-2-ol	23.5972	0.0087234	ZDVJGWXFXGJSIU-SSDOTTSWSA-N	6999721
Carthami Flos (Honghua)	MOL002748	(2R,6R,10R)-6,10,14-trimethylpentadecan-2-ol	20.9392	0.095616	HTUZNQGPJMIELO-KZNAEPCWSA-N	11032943
Carthami Flos (Honghua)	MOL002749	6-hydroxykaempferol-3,6,7-tri-O-beta-D-glucoside	3.14159	0.38743	ZYJKKAOXNQVUMQ-UPBIZEJGSA-N	0
Carthami Flos (Honghua)	MOL002750	2,4-Dichloro-5-([(E)-(4-chlorophenyl)methylidene]amino)benzoic acid	36.6193	0.036045	ASVIELUINMCNMW-FSNIPRKGSA-N	5352698
Carthami Flos (Honghua)	MOL002751	6-hydroxykaempferol-3-O-beta-D-glucoside	1.84943	0.75633	DIYGQKBUNSAYQA-XNVXCKPQSA-N	0
Carthami Flos (Honghua)	MOL002752	6-hydroxykaempferol-3-O-beta-d-Rutoside-6-O-beta-d-glucoside	3.02265	0.33599	WNHKXCOODJQCNI-FIGDBLSYSA-N	0
Carthami Flos (Honghua)	MOL002753	6-hydroxykaempferol-3-O-glucoside	1.96805	0.75634	DIYGQKBUNSAYQA-AWULYWAKSA-N	25017112
Carthami Flos (Honghua)	MOL002754	6-hydroxykaempferol-3,6-di-O-beta-D-glucoside	4.20794	0.68149	GIHCVNUAKOTVCJ-MOZNSQNKSA-N	0
Carthami Flos (Honghua)	MOL002755	6-hydroxykaempferol-6,7-di-O-beta-D-glucoside	12.7747	0.6854	GPJHFDIXJWVQRA-AINZQPTISA-N	0
Carthami Flos (Honghua)	MOL002756	6-Hydroxykaempferol-7-O-glucoside	2.8656	0.77743	IYEWEDZIDUAUTD-HSOQPIRZSA-N	5318240
Carthami Flos (Honghua)	MOL002757	7,8-dimethyl-1H-pyrimido[5,6-g]quinoxaline-2,4-dione	45.7509	0.18605	DIFBPHXISHQENP-UHFFFAOYSA-N	21786815
Carthami Flos (Honghua)	MOL002758	(E,Z)-2,8-Decadien-4,6-diyn-1-yl 3-methylbutanoate	26.6017	0.083295	FPIBENZMUTVCEK-JWPKELMXSA-N	5352701
Carthami Flos (Honghua)	MOL002759	Glyceryl pps	29.6135	0.35376	GGURWSODMXQXAF-NBSTZDJGSA-N	6438900
Carthami Flos (Honghua)	MOL002760	Hydroxybenzoyl-coumaricanhydride	1.68075	0.77666	XZBZXVHVURZKCP-MLPAPPSSSA-N	0
Carthami Flos (Honghua)	MOL002761	Sophoraflavonoloside	5.29823	0.70802	LKZDFKLGDGSGEO-UJECXLDQSA-N	5282155
Carthami Flos (Honghua)	MOL002762	Kaempferol-3-O-beta-d-rutinoside	5.51365	0.64626	KATXSBSDHYLIQA-BBFZBNOMSA-N	0
Carthami Flos (Honghua)	MOL002763	Kaempferol-3-O-rutinoside-7-O-galactoside	3.04608	0.33752	IKTXBTHVAIINSE-GTCIWDFSSA-N	0
Carthami Flos (Honghua)	MOL002764	MEGxp0_000365	1.44981	0.53248	PFDVWJCSCYDRMZ-AUCPOXKISA-N	14777879
Carthami Flos (Honghua)	MOL002765	N1,N5-(Z)-N10-(E)-tri-p-coumaroylspermidine	1.44981	0.53163	PFDVWJCSCYDRMZ-XWBZMVROSA-N	50942902
Carthami Flos (Honghua)	MOL002766	Quercetin-3,7-di-O-beta-d-glucoside	5.85514	0.66864	BNSCASRSSGJHQH-WEOKUBGSSA-N	0
Carthami Flos (Honghua)	MOL002767	1,11(Z)-Tridecadien-3,5,7,9-tetrayne	43.5111	0.037723	KBEMPFYJJCTZIG-XQRVVYSFSA-N	5352703
Carthami Flos (Honghua)	MOL002768	947-59-1	29.5944	0.12401	VLXDPFLIRFYIME-ZSAUSMIDSA-N	0
Carthami Flos (Honghua)	MOL002769	(Z)-2-methyl-5-[(1R,2S,4S)-2-methyl-3-methylene-2-norbornanyl]pent-2-en-1-ol	62.8478	0.088179	OJYKYCDSGQGTRJ-GMRLKCGNSA-N	20055019
Carthami Flos (Honghua)	MOL002770	Terthiophene	19.5605	0.074543	KXSFECAJUBPPFE-UHFFFAOYSA-N	65067
Carthami Flos (Honghua)	MOL002771	VIV	14.2646	0.55443	GVJHHUAWPYXKBD-IEOSBIPESA-N	14985
Carthami Flos (Honghua)	MOL002772	[(Z)-dec-8-en-4,6-diynyl] 3-methylbutanoate	27.8195	0.082062	KWRUHFXUFNAAJG-PLNGDYQASA-N	5352705
Carthami Flos (Honghua)	MOL002773	beta-carotene	37.1843	0.58358	OENHQHLEOONYIE-JLTXGRSLSA-N	5280489
Carthami Flos (Honghua)	MOL002774	Sitoindoside II	26.942	0.16047	MEEONOMPSMYAQO-JXJRCNQOSA-N	6438482
Carthami Flos (Honghua)	MOL002775	5,8-dimethyltocol	15.621	0.52106	WGVKWNUPNGFDFJ-DQCZWYHMSA-N	6857447
Carthami Flos (Honghua)	MOL002776	Baicalin	40.1236	0.75264	IKIIZLYTISPENI-ZFORQUDYSA-N	64982
Carthami Flos (Honghua)	MOL002777	124604-44-0	41.5681	0.036727	KAGUESUDHDXNCN-GUBXDBFYSA-N	5352706
Carthami Flos (Honghua)	MOL002778	THZ	70.3331	0.025246	IOJUPLGTWVMSFF-UHFFFAOYSA-N	7222
Carthami Flos (Honghua)	MOL002779	carthamin-precursor	3.0145	0.20756	LMOLWGUAJZPYNK-BEROKBBWSA-N	0
Carthami Flos (Honghua)	MOL002780	carthamin	3.01534	0.22185	XPDZBYOXDOXYSL-JZSITLBYSA-N	0
Carthami Flos (Honghua)	MOL002781	carthamone	5.92689	0.62722	YQNGUUQYDSHYMO-HCPKDBBFSA-N	0
Carthami Flos (Honghua)	MOL002782	Dihydroaplotaxene	4.77963	0.076188	XFZBIINLEPBMDY-NERFDCTISA-N	5352709
Carthami Flos (Honghua)	MOL002783	Cumalic acid	43.0983	0.028014	ORGPJDKNYMVLFL-UHFFFAOYSA-N	68141
Carthami Flos (Honghua)	MOL002784	CYCLODODECANOL	41.4496	0.042651	SFVWPXMPRCIVOK-UHFFFAOYSA-N	15595
Carthami Flos (Honghua)	MOL002785	deca-4,6-diynyl 3-methylbutanoate	20.6871	0.080311	NVMLEKVHEUTCIU-UHFFFAOYSA-N	528753
Piperis Longi Fructus(Bibo)	MOL000018	(+/-)-Isoborneol	86.9841	0.05275	DTGKSKDOIYIVQL-MRTMQBJTSA-N	6321405
Piperis Longi Fructus(Bibo)	MOL000024	alpha-humulene	22.9768	0.061124	FAMPSKZZVDUYOS-HRGUGZIWSA-N	5281520
Piperis Longi Fructus(Bibo)	MOL000069	palmitic acid	19.2966	0.098573	IPCSVZSSVZVIGE-UHFFFAOYSA-N	985
Piperis Longi Fructus(Bibo)	MOL000117	Cymol	27.2038	0.022463	HFPZCAJZSCWRBC-UHFFFAOYSA-N	7463
Piperis Longi Fructus(Bibo)	MOL000122	1,8-cineole	39.7292	0.049041	WEEGYLXZBRQIMU-WAAGHKOSSA-N	2758
Piperis Longi Fructus(Bibo)	MOL000125	(-)-alpha-Pinene	46.2498	0.052565	GRWFGVWFFZKLTI-IUCAKERBSA-N	440968
Piperis Longi Fructus(Bibo)	MOL000126	(-)-nopinene	44.8353	0.052595	WTARULDDTDQWMU-IUCAKERBSA-N	440967
Piperis Longi Fructus(Bibo)	MOL000130	CAM	67.1738	0.053027	DSSYKIVIOFKYAU-XCBNKYQSSA-N	159055
Piperis Longi Fructus(Bibo)	MOL000193	(Z)-caryophyllene	30.2907	0.089886	NPNUFJAVOOONJE-BLOBHPOZSA-N	6429301
Piperis Longi Fructus(Bibo)	MOL000197	Myrcene	24.9638	0.015286	UAHWPYUMFXYFJY-UHFFFAOYSA-N	31253
Piperis Longi Fructus(Bibo)	MOL000198	(R)-linalool	39.8043	0.022686	CDOSHBSSFJOMGT-JTQLQIEISA-N	443158
Piperis Longi Fructus(Bibo)	MOL000201	p-Ocimene	15.0605	0.015199	IHPKGUQCSIINRJ-CSKARUKUSA-N	5281553
Piperis Longi Fructus(Bibo)	MOL000202	Moslene	33.0164	0.02224	YKFLAYDHMOASIY-UHFFFAOYSA-N	7461
Piperis Longi Fructus(Bibo)	MOL000204	-cis-.beta.-Elemene diastereomer	28.6213	0.060524	OPFTUNCRGUEPRZ-RBSFLKMASA-N	6431152
Piperis Longi Fructus(Bibo)	MOL000206	isoeugenol	70.1003	0.036329	BJIOGJUNALELMI-ONEGZZNKSA-N	853433
Piperis Longi Fructus(Bibo)	MOL000266	beta-Cubebene	32.8133	0.10858	FSRZGYRCMPZNJF-KHMAMNHCSA-N	0
Piperis Longi Fructus(Bibo)	MOL000268	(1S,5S)-1-isopropyl-4-methylenebicyclo[3.1.0]hexane	46.2051	0.043544	NDVASEGYNIMXJL-UWVGGRQHSA-N	11051711
Piperis Longi Fructus(Bibo)	MOL000270	CHEBI:7	45.1981	0.04265	BQOFWKZOCNGFEC-BDAKNGLRSA-N	443156
Piperis Longi Fructus(Bibo)	MOL000340	HCI	35.8319	0.028973	XMIIGOLPHOKFCH-UHFFFAOYSA-N	107
Piperis Longi Fructus(Bibo)	MOL000475	anethole	32.4923	0.02782	RUVINXPYWBROJD-ONEGZZNKSA-N	637563
Piperis Longi Fructus(Bibo)	MOL000479	Farnesene	17.4181	0.047569	JSNRRGGBADWTMC-NTCAYCPXSA-N	5281517
Piperis Longi Fructus(Bibo)	MOL000608	()-Terpinen-4-ol	81.4067	0.032323	WRYLYDPHFGVWKC-SNVBAGLBSA-N	2724161
Piperis Longi Fructus(Bibo)	MOL000610	TRD	17.8912	0.031021	IIYFAKIEWZDVMP-UHFFFAOYSA-N	12388
Piperis Longi Fructus(Bibo)	MOL000612	(-)-alpha-cedrene	55.561	0.10498	IRAQOCYXUMOFCW-OSFYFWSMSA-N	0
Piperis Longi Fructus(Bibo)	MOL000864	MYS	13.9811	0.04922	YCOZIPAWZNQLMR-UHFFFAOYSA-N	12391
Piperis Longi Fructus(Bibo)	MOL000867	Heptadekan	8.64247	0.074658	NDJKXXJCMXVBJW-UHFFFAOYSA-N	12398
Piperis Longi Fructus(Bibo)	MOL000913	tricyclene	36.1127	0.072664	RRBYUSWBLVXTQN-UICFKRDXSA-N	55250308
Piperis Longi Fructus(Bibo)	MOL000920	LINALOOL (D)	38.2886	0.022731	CDOSHBSSFJOMGT-SNVBAGLBSA-N	67179
Piperis Longi Fructus(Bibo)	MOL000929	(5S)-5-[(1R)-1,5-dimethylhex-4-enyl]-2-methylcyclohexa-1,3-diene	16.6602	0.055476	KKOXKGNSUHTUBV-CABCVRRESA-N	11127403
Piperis Longi Fructus(Bibo)	MOL000932	alpha-Farnesene	21.7035	0.047239	CXENHBSYCFFKJS-VDQVFBMKSA-N	5281516
Piperis Longi Fructus(Bibo)	MOL000945	bisdemethoxycurcumin	3.55385	0.26102	PREBVFJICNPEKM-JTAXDKCCSA-N	45934475
Piperis Longi Fructus(Bibo)	MOL000968	beta-Bisabolene	29.5897	0.055235	XZRVRYFILCSYSP-HNNXBMFYSA-N	68128
Piperis Longi Fructus(Bibo)	MOL001201	(1R,5R,7S)-4,7-dimethyl-7-(4-methylpent-3-enyl)bicyclo[3.1.1]hept-3-ene	16.2256	0.090114	YMBFCQPIMVLNIU-KFWWJZLASA-N	13889654
Piperis Longi Fructus(Bibo)	MOL001218	Pisol	18.4965	0.032811	LQZZUXJYWNFBMV-UHFFFAOYSA-N	8193
Piperis Longi Fructus(Bibo)	MOL001224	Tridecylene	17.6901	0.03167	VQOXUMQBYILCKR-UHFFFAOYSA-N	17095
Piperis Longi Fructus(Bibo)	MOL001555	ZINC03996196	52.3456	0.62037	PEUUVVGQIVMSAW-AJAKECSLSA-N	7299790
Piperis Longi Fructus(Bibo)	MOL001556	Isocaryophyllene	27.3023	0.089903	NPNUFJAVOOONJE-FLFDDASRSA-N	5281522
Piperis Longi Fructus(Bibo)	MOL001557	CIS-DECAHYDRONAPHTHALENE	49.5062	0.031431	NNBZCPXTIHJBJL-AOOOYVTPSA-N	7044
Piperis Longi Fructus(Bibo)	MOL001558	sesamin	56.5471	0.82722	PEYUIKBAABKQKQ-AFHBHXEDSA-N	72307
Piperis Longi Fructus(Bibo)	MOL001559	piperlonguminine	30.7114	0.1802	WHAAPCGHVWVUEX-GGWOSOGESA-N	5320621
Piperis Longi Fructus(Bibo)	MOL001560	pipernonaline	51.3157	0.4092	PKLGRWSJBLGIBF-NAKBGQTNSA-N	0
Piperis Longi Fructus(Bibo)	MOL001561	dehydropipernonaline	47.7287	0.41207	KAYVDASZRFLFRZ-XRPSMPKOSA-N	0
Piperis Longi Fructus(Bibo)	MOL001562	Nonadecene	5.23392	0.111	NHLUYCJZUXOUBX-UHFFFAOYSA-N	29075
Piperis Longi Fructus(Bibo)	MOL001563	piperundecalidine	29.9557	0.51834	BADLEYLQAILHPV-KJBFNNNQSA-N	0
Piperis Longi Fructus(Bibo)	MOL001564	PIP	57.6846	0.0061501	NQRYJNQNLNOLGT-UHFFFAOYSA-N	8082
Piperis Longi Fructus(Bibo)	MOL001565	HEPTADECENE	20.0332	0.076039	ADOBXTDBFNCOBN-UHFFFAOYSA-N	23217
Piperis Longi Fructus(Bibo)	MOL001566	calarene	52.1627	0.11399	MBIPADCEHSKJDQ-MUYACECFSA-N	15560279
Piperis Longi Fructus(Bibo)	MOL001567	2,4-Dimethoxytoluene	19.6219	0.030107	OSNMRWURXNWCGA-UHFFFAOYSA-N	96403
Piperis Longi Fructus(Bibo)	MOL001568	2-Diazo-2,3-dihydro-3-methyl-1H-inden-1-one	68.9779	0.061773	MYTIUEXNNKMCAJ-LURJTMIESA-N	0
Piperis Longi Fructus(Bibo)	MOL001569	3-phenylundecane	4.62706	0.076346	NVHBFHMWJJMQTG-MRXNPFEDSA-N	0
Piperis Longi Fructus(Bibo)	MOL001570	1,4,7,-Cycloundecatriene, 1,5,9,9-tetramethyl-, Z,Z,Z-	20.8204	0.061131	FVWQAXRELOCFSV-AZDRRDCDSA-N	5368784
Piperis Longi Fructus(Bibo)	MOL001571	4-[(1-Carboxy-2-methylbutyl)amino]-2(1H)-pyrimidinone	27.9634	0.072623	MJWXTXFBHYPRFA-POYBYMJQSA-N	0
Piperis Longi Fructus(Bibo)	MOL001572	8-Heptadecene	4.85986	0.07532	BIQKRILZMDQPHI-BMRADRMJSA-N	5364555
Piperis Longi Fructus(Bibo)	MOL001573	Methyl hydrocinnamate	29.0489	0.034837	RPUSRLKKXPQSGP-UHFFFAOYSA-N	7643
Piperis Longi Fructus(Bibo)	MOL001574	Bicyclo[3. 2. 2]non-6-en-3-one	36.2761	0.029411	SFXYSVJSZVTHII-OCAPTIKFSA-N	0
Piperis Longi Fructus(Bibo)	MOL001575	cedryl acetate	53.9362	0.1725	OETMLOBORLMQPE-YIUHCBHRSA-N	0
Piperis Longi Fructus(Bibo)	MOL001576	(2R,4aR,8aR)-2-methyldecalin	56.4495	0.038723	GREARFRXIFVLGB-GMTAPVOTSA-N	12816526
Piperis Longi Fructus(Bibo)	MOL001577	Dodecahydropyrido [1,2-b]isoquinolin -6-one	61.2915	0.1116	OLWPUTPKEBKCOC-SRVKXCTJSA-N	0
Piperis Longi Fructus(Bibo)	MOL001578	Hypnon	48.1926	0.018645	KWOLFJPFCHCOCG-UHFFFAOYSA-N	7410
Piperis Longi Fructus(Bibo)	MOL001579	germacrene	15.0584	0.056031	IQSPYJZCWMAJLU-CYSUXKILSA-N	0
Piperis Longi Fructus(Bibo)	MOL001580	Piperonal	32.7378	0.041821	SATCULPHIDQDRE-UHFFFAOYSA-N	8438
Piperis Longi Fructus(Bibo)	MOL001581	Isobutylisovalerate	21.5159	0.020276	KEBDNKNVCHQIJU-UHFFFAOYSA-N	11514
Piperis Longi Fructus(Bibo)	MOL001582	Isolongifolene epoxide	103.317	0.15862	VQHLGZRKOZIABH-FIXIBIHLSA-N	0
Piperis Longi Fructus(Bibo)	MOL001583	Lawsone	27.6255	0.066253	CSFWPUWCSPOLJW-UHFFFAOYSA-N	6755
Piperis Longi Fructus(Bibo)	MOL001584	[(3S)-3,7-dimethylocta-1,6-dien-3-yl] propanoate	45.652	0.048564	WAQIIHCCEMGYKP-CYBMUJFWSA-N	1616358
Piperis Longi Fructus(Bibo)	MOL001585	9,17-OCTADECADIENAL (Z)	38.2569	0.1196	RXORHYFDDNAOQS-KTKRTIGZSA-N	5365667
Piperis Longi Fructus(Bibo)	MOL001586	N-(2,5-dimethoxyphenyl)-4-methoxybenzamide	60.6974	0.18097	CFFUCEHTAUTSAT-UHFFFAOYSA-N	532276
Piperis Longi Fructus(Bibo)	MOL001587	(E)-5-(4-hydroxy-3-methoxy-phenyl)-1-piperidino-pent-2-en-1-one	10.9665	0.18813	VHTQQWCWSZHGTL-XBXARRHUSA-N	11630663
Piperis Longi Fructus(Bibo)	MOL001588	N-isobutyleicosa-2(E),4(E),8(Z)-trienamide	44.4846	0.32311	WBBCNGSATYECFE-VPDWFJFDSA-N	0
Piperis Longi Fructus(Bibo)	MOL001589	N-Isobutyl-2,4-icosadienamide	38.8553	0.31929	LMZPUHBJSQVRHE-HYGARKJASA-N	6441067
Piperis Longi Fructus(Bibo)	MOL001590	N-isobutyl-decatrans-2-trans-4-dienamide	22.2797	0.049908	WSHHXRFSFYVCKJ-XBLVEGMJSA-N	0
Piperis Longi Fructus(Bibo)	MOL001591	p-Amino-o-cresol	68.303	0.02062	HDGMAACKJSBLMW-UHFFFAOYSA-N	76081
Piperis Longi Fructus(Bibo)	MOL001592	piperine	42.5167	0.23406	MXXWOMGUGJBKIW-YPCIICBESA-N	638024
Piperis Longi Fructus(Bibo)	MOL001593	Piperitenone	40.0544	0.030051	HKZQJZIFODOLFR-UHFFFAOYSA-N	381152
Piperis Longi Fructus(Bibo)	MOL001594	Pisatin	88.0501	0.64232	LZMRDTLRSDRUSU-SJORKVTESA-N	0
Piperis Longi Fructus(Bibo)	MOL001595	sesamol	66.3392	0.034314	LUSZGTFNYDARNI-UHFFFAOYSA-N	68289
Piperis Longi Fructus(Bibo)	MOL001596	tetradecadiene-1,13	17.7374	0.041065	XMRSTLBCBDIKFI-UHFFFAOYSA-N	30875
Piperis Longi Fructus(Bibo)	MOL001597	Tetradecahydro-1-methylphenanthrene	37.5146	0.10985	SWDNSUKBMAGLLL-JARUQAPTSA-N	0
Piperis Longi Fructus(Bibo)	MOL001598	Undulatone	17.2028	0.7145	VKCVPDRXEYKUOZ-ZZWVBLAUSA-N	0
Piperis Longi Fructus(Bibo)	MOL001599	α-cubebol	64.8052	0.085702	BOBTWVZHSPRDFC-OUCADQQQSA-N	0
Piperis Longi Fructus(Bibo)	MOL001600	copaene	29.4734	0.12401	VLXDPFLIRFYIME-QRTUWBSPSA-N	0
Piperis Longi Fructus(Bibo)	MOL001601	1,2,5,6-tetrahydrotanshinone	38.7454	0.35791	AZIUYJPOBCMPON-SNVBAGLBSA-N	0
Piperis Longi Fructus(Bibo)	MOL001602	1,4-cadinadiene	16.7325	0.077185	JUQGWBAOQUBVFP-GZBFAFLISA-N	50986185
Piperis Longi Fructus(Bibo)	MOL001603	demethoxycurcumin	4.36912	0.33252	HJTVQHVGMGKONQ-DHPVUTNOSA-N	0
Piperis Longi Fructus(Bibo)	MOL001604	Linalool	49.3674	0.042561	SATQWIIUJKWZNO-SCZZXKLOSA-N	0
Piperis Longi Fructus(Bibo)	MOL001605	cis-2-Decalone	43.8248	0.040057	LGVJRKCQQHOWAU-DTWKUNHWSA-N	246289
Piperis Longi Fructus(Bibo)	MOL001606	BB_NC-0668	35.5721	0.082297	QEBNYNLSCGVZOH-NFAWXSAZSA-N	9855795
Piperis Longi Fructus(Bibo)	MOL001607	ZINC03982454	36.9139	0.75559	KZJWDPNRJALLNS-ZGFRWYMBSA-N	11870467
Piperis Longi Fructus(Bibo)	MOL001608	delta-elemene	26.9786	0.060201	MXDMETWAEGIFOE-CABCVRRESA-N	12309449
Piperis Longi Fructus(Bibo)	MOL001609	Cyclodecene, 1-methyl-	53.6006	0.025137	AAZWWRDLCYIVAB-LUAWRHEFSA-N	5367581
Piperis Longi Fructus(Bibo)	MOL001610	sylvatine	43.9967	0.50977	URFYPQQKBYOWIX-SWZGVYIDSA-N	0
Piperis Longi Fructus(Bibo)	MOL001611	dihydropiperlonguminine	26.6649	0.17855	CSGDXLXTJVRNEA-GQCTYLIASA-N	12682184
Piperis Longi Fructus(Bibo)	MOL001612	PIPERONYLIC ACID	56.943	0.051718	VDVJGIYXDVPQLP-UHFFFAOYSA-N	7196
Piperis Longi Fructus(Bibo)	MOL001614	(E,E,E)-11-(1,3-Benzodioxol-5-yl)-N-(2-methylpropyl)-2,4,10-undecatrienenamide	42.7228	0.43055	ZNCPOBHLRPYOHA-KKSZINRNSA-N	6453083
Piperis Longi Fructus(Bibo)	MOL001615	Cyclopentadecane	15.9415	0.070262	SRONXYPFSAKOGH-UHFFFAOYSA-N	67525
Piperis Longi Fructus(Bibo)	MOL001616	1-[1-oxo-9(3, 4-methylenedioxyphenyl)-2E,8E-nonadienyl] pyrrolidine	49.4254	0.35884	BYKNKNBUHGFXQF-VTBWALSUSA-N	0
Piperis Longi Fructus(Bibo)	MOL001617	guineensine	28.8616	0.45529	INYLODPHWPYIKQ-NLCRFJRRSA-N	0
Piperis Longi Fructus(Bibo)	MOL001618	Pellitorin	23.8051	0.061274	MAGQQZHFHJDIRE-BNFZFUHLSA-N	5318516
Piperis Longi Fructus(Bibo)	MOL001619	UPL	8.5205	0.10901	LQERIDTXQFOHKA-UHFFFAOYSA-N	12401
Piperis Longi Fructus(Bibo)	MOL001620	Pentadecene	17.7243	0.050176	PJLHTVIBELQURV-UHFFFAOYSA-N	25913
Piperis Longi Fructus(Bibo)	MOL001621	l-undecylenyl-3,4-methylenedioxybenzene	47.9733	0.17974	DEHDKPYUMUUMTK-ZHACJKMWSA-N	0
Piperis Longi Fructus(Bibo)	MOL002003	(-)-Caryophyllene oxide	32.6701	0.12925	NVEQFIOZRFFVFW-GUIRCDHDSA-N	0
Piperis Longi Fructus(Bibo)	MOL002085	alpha-Cubebene	16.7321	0.10854	XUEHVOLRMXNRKQ-KHMAMNHCSA-N	0
Piperis Longi Fructus(Bibo)	MOL002861	Piperanine	25.3793	0.23211	QHWOFMXDKFORMO-XVNBXDOJSA-N	5320618
Amomi Fructus Rotundus (Doukou)	MOL000006	luteolin	36.1626	0.24552	IQPNAANSBPBGFQ-UHFFFAOYSA-N	5280445
Amomi Fructus Rotundus (Doukou)	MOL000019	D-Camphene	34.9792	0.039017	CRPUJAZIXJMDBK-DTWKUNHWSA-N	92221
Amomi Fructus Rotundus (Doukou)	MOL000024	alpha-humulene	22.9768	0.061124	FAMPSKZZVDUYOS-HRGUGZIWSA-N	5281520
Amomi Fructus Rotundus (Doukou)	MOL000086	(24S)-5beta-Stigmastan-3beta-ol	25.3221	0.74704	LGJMUZUPVCAVPU-RMEUMSAISA-N	6451614
Amomi Fructus Rotundus (Doukou)	MOL000095	delta 7-stigmastenol	25.3221	0.74807	LGJMUZUPVCAVPU-BDICFNGDSA-N	0
Amomi Fructus Rotundus (Doukou)	MOL000098	quercetin	46.4333	0.27525	REFJWTPEDVJJIY-UHFFFAOYSA-N	5280343
Amomi Fructus Rotundus (Doukou)	MOL000105	protocatechuic acid	25.3665	0.035092	YQUVCSBJEUQKSH-UHFFFAOYSA-N	72
Amomi Fructus Rotundus (Doukou)	MOL000117	Cymol	27.2038	0.022463	HFPZCAJZSCWRBC-UHFFFAOYSA-N	7463
Amomi Fructus Rotundus (Doukou)	MOL000118	(L)-alpha-Terpineol	48.7978	0.030772	WUOACPNHFRMFPN-SECBINFHSA-N	443162
Amomi Fructus Rotundus (Doukou)	MOL000119	ZINC02040970	40.4334	0.06012	FQTLCLSUCSAZDY-GOFCXVBSSA-N	11241545
Amomi Fructus Rotundus (Doukou)	MOL000122	1,8-cineole	39.7292	0.049041	WEEGYLXZBRQIMU-WAAGHKOSSA-N	2758
Amomi Fructus Rotundus (Doukou)	MOL000125	(-)-alpha-Pinene	46.2498	0.052565	GRWFGVWFFZKLTI-IUCAKERBSA-N	440968
Amomi Fructus Rotundus (Doukou)	MOL000126	(-)-nopinene	44.8353	0.052595	WTARULDDTDQWMU-IUCAKERBSA-N	440967
Amomi Fructus Rotundus (Doukou)	MOL000128	NERYLACETATE	25.94	0.041771	HIGQPQRQIQDZMP-DHZHZOJOSA-N	1549026
Amomi Fructus Rotundus (Doukou)	MOL000130	CAM	67.1738	0.053027	DSSYKIVIOFKYAU-XCBNKYQSSA-N	159055
Amomi Fructus Rotundus (Doukou)	MOL000193	(Z)-caryophyllene	30.2907	0.089886	NPNUFJAVOOONJE-BLOBHPOZSA-N	6429301
Amomi Fructus Rotundus (Doukou)	MOL000196	L-Bornyl acetate	65.5209	0.075447	KGEKLUUHTZCSIP-HOSYDEDBSA-N	93009
Amomi Fructus Rotundus (Doukou)	MOL000197	Myrcene	24.9638	0.015286	UAHWPYUMFXYFJY-UHFFFAOYSA-N	31253
Amomi Fructus Rotundus (Doukou)	MOL000198	(R)-linalool	39.8043	0.022686	CDOSHBSSFJOMGT-JTQLQIEISA-N	443158
Amomi Fructus Rotundus (Doukou)	MOL000199	Safrol	45.3367	0.047125	ZMQAAUBTXCXRIC-UHFFFAOYSA-N	5144
Amomi Fructus Rotundus (Doukou)	MOL000200	(S)-(+)-alpha-Phellandrene	27.9023	0.022258	OGLDWXZKYODSOB-JTQLQIEISA-N	443160
Amomi Fructus Rotundus (Doukou)	MOL000202	Moslene	33.0164	0.02224	YKFLAYDHMOASIY-UHFFFAOYSA-N	7461
Amomi Fructus Rotundus (Doukou)	MOL000207	Methyleugenol	73.3601	0.042845	ZYEMGPIYFIJGTP-UHFFFAOYSA-N	7127
Amomi Fructus Rotundus (Doukou)	MOL000224	(4E,6E)-1,7-bis(3,4-dihydroxyphenyl)hepta-4,6-dien-3-one	33.0575	0.31386	VJJPCEDEDJXHHK-ZPUQHVIOSA-N	10426520
Amomi Fructus Rotundus (Doukou)	MOL000225	2,3,7-trihydroxy-5-(3,4-dihydroxy-E-styryl)-6,7,8,9-tetrahydro-5H-benzocycloheptene	13.244	0.35394	MRNGQDIXPSBGLO-QSNCJDHVSA-N	0
Amomi Fructus Rotundus (Doukou)	MOL000226	1,7-diphenyl-5-hydroxy-4,6-heptadien-3-one	11.2577	0.18505	MJCANANSGRMBIC-HHEXEYPASA-N	0
Amomi Fructus Rotundus (Doukou)	MOL000227	Alnusone	63.119	0.16607	OWMJDOUOHDOUFG-FNCQTZNRSA-N	5317598
Amomi Fructus Rotundus (Doukou)	MOL000228	(2R)-7-hydroxy-5-methoxy-2-phenylchroman-4-one	55.2332	0.20163	QQQCWVDPMPFUGF-CYBMUJFWSA-N	821279
Amomi Fructus Rotundus (Doukou)	MOL000229	cardamomin	68.9604	0.16086	NYSZJNUIVUBQMM-BQYQJAHWSA-N	641785
Amomi Fructus Rotundus (Doukou)	MOL000230	Pinocembrin	57.5625	0.20199	AZTAQMQWFPLFOG-AWEZNQCLSA-N	0
Amomi Fructus Rotundus (Doukou)	MOL000231	trans-1,7-Diphenyl-1hepten-5-ol	46.7337	0.1627	DPRCKWANIKZGTF-HBAHQKBISA-N	0
Amomi Fructus Rotundus (Doukou)	MOL000232	()-alpha-Terpineol	46.2978	0.030811	WUOACPNHFRMFPN-VIFPVBQESA-N	442501
Amomi Fructus Rotundus (Doukou)	MOL000233	delta-Terpineol	55.1099	0.030896	SQIFACVGCPWBQZ-UHFFFAOYSA-N	81722
Amomi Fructus Rotundus (Doukou)	MOL000234	L-Limonen	38.0934	0.022306	XMGQYMWWDOXHJM-SNVBAGLBSA-N	439250
Amomi Fructus Rotundus (Doukou)	MOL000235	1,7-diphenyl-3,5-dihydroxy-1-heptene	49.0129	0.18058	YSRHCYXKOMRFPK-SOEZKFKDSA-N	0
Amomi Fructus Rotundus (Doukou)	MOL000236	1,7-diphenyl-4,6-heptadien-3-one	61.396	0.16601	OWMJDOUOHDOUFG-MFUUIURDSA-N	0
Amomi Fructus Rotundus (Doukou)	MOL000237	Trans-1,7-diphenyl-1-hepten-5-ol	46.7337	0.16251	DPRCKWANIKZGTF-KRSRXSRCSA-N	44560846
Amomi Fructus Rotundus (Doukou)	MOL000238	1,7-diphenyl-5-hydroxy-6-hepten-3-one	32.6498	0.18295	NEQGOKAKPXXESR-IYPOZPNPSA-N	57520989
Amomi Fructus Rotundus (Doukou)	MOL000239	Jaranol	50.8288	0.29148	BJBUTJQYZDYRMJ-UHFFFAOYSA-N	5318869
Amomi Fructus Rotundus (Doukou)	MOL000240	(3R,5S)-1,7-di(phenyl)heptane-3,5-diol	48.3493	0.17942	QSUSPILNZCEGPK-KDURUIRLSA-N	21637670
Amomi Fructus Rotundus (Doukou)	MOL000241	2',4'-dihydroxy-6'-methhoxychalcone	65.5315	0.16059	NYSZJNUIVUBQMM-FPLPWBNLSA-N	0
Amomi Fructus Rotundus (Doukou)	MOL000242	7-O-Methyleriodictyol	56.5614	0.27022	DSAJORLEPQBKDA-AWEZNQCLSA-N	1268276
Amomi Fructus Rotundus (Doukou)	MOL000243	alpinolide peroxide	87.6678	0.18647	HLNVEFWIEKHWOI-GHBALNIRSA-N	0
Amomi Fructus Rotundus (Doukou)	MOL000244	()-Borneol	81.8031	0.052753	DTGKSKDOIYIVQL-WEDXCCLWSA-N	6552009
Amomi Fructus Rotundus (Doukou)	MOL000245	Demethoxyyangonin	22.49	0.10521	DKKJNZYHGRUXBS-BQYQJAHWSA-N	5273621
Amomi Fructus Rotundus (Doukou)	MOL000246	(2R)-5,7-dihydroxy-2-phenylchroman-4-one	46.0766	0.17997	URFCJEUYXNAHFI-CYBMUJFWSA-N	667544
Amomi Fructus Rotundus (Doukou)	MOL000247	(Z,Z)-farnesol	41.1358	0.058711	CRDAMVZIKSXKFV-FBXUGWQNSA-N	1549107
Amomi Fructus Rotundus (Doukou)	MOL000248	(5S)-5-isopropyl-2-methyl-1-cyclohex-2-enone	52.8993	0.029461	WPGPCDVQHXOMQP-VIFPVBQESA-N	6432475
Amomi Fructus Rotundus (Doukou)	MOL000249	Methylcinnamate	18.4175	0.035378	CCRCUPLGCSFEDV-BQYQJAHWSA-N	637520
Amomi Fructus Rotundus (Doukou)	MOL000250	cis-Cinnamaldehyde	27.2107	0.022639	KJPRLNWUNMBNBZ-DAXSKMNVSA-N	6428995
Amomi Fructus Rotundus (Doukou)	MOL000251	Rhamnocitrin	12.8991	0.26607	MQSZRBPYXNEFHF-UHFFFAOYSA-N	5320946
Amomi Fructus Rotundus (Doukou)	MOL000252	farnesol	28.442	0.059083	CRDAMVZIKSXKFV-YFVJMOTDSA-N	445070
Amomi Fructus Rotundus (Doukou)	MOL000253	Styrene, 3,4-dimethyl-	32.4116	0.023799	PMZXJPLGCUVUDN-UHFFFAOYSA-N	33937
Amomi Fructus Rotundus (Doukou)	MOL000254	eugenol	56.2419	0.036518	RRAFCDWBNXTKKO-UHFFFAOYSA-N	3314
Amomi Fructus Rotundus (Doukou)	MOL000255	Myristin	17.7574	0.29001	DUXYWXYOBMKGIN-UHFFFAOYSA-N	11148
Amomi Fructus Rotundus (Doukou)	MOL000256	Olein	27.2709	0.13183	PHYFQTYBJUILEZ-IUPFWZBJSA-N	5497163
Amomi Fructus Rotundus (Doukou)	MOL000257	(-)-beta-Phellandrene	40.4445	0.022312	LFJQCDVYDGGFCH-SNVBAGLBSA-N	443161
Amomi Fructus Rotundus (Doukou)	MOL000258	dehydrodiisoeugenol	56.8382	0.28531	SGYVGMXKKRURSX-APHBUQMISA-N	0
Amomi Fructus Rotundus (Doukou)	MOL000259	o-Thymol	43.2813	0.029778	RECUKUPTGUEGMW-UHFFFAOYSA-N	10364
Amomi Fructus Rotundus (Doukou)	MOL000260	5-[(2R,3R)-7-methoxy-3-methyl-5-[(E)-prop-1-enyl]-2,3-dihydrobenzofuran-2-yl]-1,3-benzodioxole	65.5526	0.40264	DMMQXURQRMNSBM-YZAYTREXSA-N	6441061
Amomi Fructus Rotundus (Doukou)	MOL000261	Myristicin	17.9854	0.067649	BNWJOHGLIBDBOB-UHFFFAOYSA-N	4276
Amomi Fructus Rotundus (Doukou)	MOL000262	(1R,4S)-1,7,7-trimethylbicyclo[2.2.1]hept-2-ene	39.6187	0.043504	KUKRLSJNTMLPPK-SCZZXKLOSA-N	20055133
Amomi Fructus Rotundus (Doukou)	MOL000263	oleanolic acid	29.0208	0.75599	MIJYXULNPSFWEK-GTOFXWBISA-N	10494
Amomi Fructus Rotundus (Doukou)	MOL000264	Tereben	29.6244	0.022251	MOYAFQVGZZPNRA-UHFFFAOYSA-N	11463
Amomi Fructus Rotundus (Doukou)	MOL000265	ISOELEMICIN	46.7175	0.060624	RRXOQHQFJOQLQR-AATRIKPKSA-N	5318557
Amomi Fructus Rotundus (Doukou)	MOL000266	beta-Cubebene	32.8133	0.10858	FSRZGYRCMPZNJF-KHMAMNHCSA-N	0
Amomi Fructus Rotundus (Doukou)	MOL000267	beta-Citronellol	38.8875	0.019906	QMVPMAAFGQKVCJ-SNVBAGLBSA-N	101977
Amomi Fructus Rotundus (Doukou)	MOL000268	(1S,5S)-1-isopropyl-4-methylenebicyclo[3.1.0]hexane	46.2051	0.043544	NDVASEGYNIMXJL-UWVGGRQHSA-N	11051711
Amomi Fructus Rotundus (Doukou)	MOL000269	Elemicin	21.9407	0.060865	BPLQKQKXWHCZSS-UHFFFAOYSA-N	10248
Amomi Fructus Rotundus (Doukou)	MOL000270	CHEBI:7	45.1981	0.04265	BQOFWKZOCNGFEC-BDAKNGLRSA-N	443156
Amomi Fructus Rotundus (Doukou)	MOL000271	l-carvone	49.4698	0.02998	ULDHMXUKGWMISQ-SECBINFHSA-N	439570
Cinnamomi Cortex (Rougui)	MOL000019	D-Camphene	34.9792	0.039017	CRPUJAZIXJMDBK-DTWKUNHWSA-N	92221
Cinnamomi Cortex (Rougui)	MOL000024	alpha-humulene	22.9768	0.061124	FAMPSKZZVDUYOS-HRGUGZIWSA-N	5281520
Cinnamomi Cortex (Rougui)	MOL000035	beta-Selinene	24.3882	0.081081	YOVSPTNQHMDJAG-QLFBSQMISA-N	442393
Cinnamomi Cortex (Rougui)	MOL000057	DIBP	49.6341	0.13067	MGWAVDBGNNKXQV-UHFFFAOYSA-N	6782
Cinnamomi Cortex (Rougui)	MOL000069	palmitic acid	19.2966	0.098573	IPCSVZSSVZVIGE-UHFFFAOYSA-N	985
Cinnamomi Cortex (Rougui)	MOL000117	Cymol	27.2038	0.022463	HFPZCAJZSCWRBC-UHFFFAOYSA-N	7463
Cinnamomi Cortex (Rougui)	MOL000118	(L)-alpha-Terpineol	48.7978	0.030772	WUOACPNHFRMFPN-SECBINFHSA-N	443162
Cinnamomi Cortex (Rougui)	MOL000119	ZINC02040970	40.4334	0.06012	FQTLCLSUCSAZDY-GOFCXVBSSA-N	11241545
Cinnamomi Cortex (Rougui)	MOL000122	1,8-cineole	39.7292	0.049041	WEEGYLXZBRQIMU-WAAGHKOSSA-N	2758
Cinnamomi Cortex (Rougui)	MOL000125	(-)-alpha-Pinene	46.2498	0.052565	GRWFGVWFFZKLTI-IUCAKERBSA-N	440968
Cinnamomi Cortex (Rougui)	MOL000126	(-)-nopinene	44.8353	0.052595	WTARULDDTDQWMU-IUCAKERBSA-N	440967
Cinnamomi Cortex (Rougui)	MOL000128	NERYLACETATE	25.94	0.041771	HIGQPQRQIQDZMP-DHZHZOJOSA-N	1549026
Cinnamomi Cortex (Rougui)	MOL000130	CAM	67.1738	0.053027	DSSYKIVIOFKYAU-XCBNKYQSSA-N	159055
Cinnamomi Cortex (Rougui)	MOL000131	EIC	41.9044	0.14347	OYHQOLUKZRVURQ-HZJYTTRNSA-N	5280450
Cinnamomi Cortex (Rougui)	MOL000166	ZINC01609418	21.6157	0.067639	RGZSQWQPBWRIAQ-LSDHHAIUSA-N	1549992
Cinnamomi Cortex (Rougui)	MOL000170	guaiene	28.2137	0.071869	GIBQERSGRNPMEH-NWDGAFQWSA-N	0
Cinnamomi Cortex (Rougui)	MOL000172	Furol	34.351	0.010395	HYBBIBNJHNGZAN-UHFFFAOYSA-N	7362
Cinnamomi Cortex (Rougui)	MOL000193	(Z)-caryophyllene	30.2907	0.089886	NPNUFJAVOOONJE-BLOBHPOZSA-N	6429301
Cinnamomi Cortex (Rougui)	MOL000197	Myrcene	24.9638	0.015286	UAHWPYUMFXYFJY-UHFFFAOYSA-N	31253
Cinnamomi Cortex (Rougui)	MOL000198	(R)-linalool	39.8043	0.022686	CDOSHBSSFJOMGT-JTQLQIEISA-N	443158
Cinnamomi Cortex (Rougui)	MOL000201	p-Ocimene	15.0605	0.015199	IHPKGUQCSIINRJ-CSKARUKUSA-N	5281553
Cinnamomi Cortex (Rougui)	MOL000202	Moslene	33.0164	0.02224	YKFLAYDHMOASIY-UHFFFAOYSA-N	7461
Cinnamomi Cortex (Rougui)	MOL000208	()-Aromadendrene	55.7417	0.10418	ITYNGVSTWVVPIC-XVIXHAIJSA-N	11095734
Cinnamomi Cortex (Rougui)	MOL000219	BOX	31.5464	0.020166	WPYMKLBDIGXBTP-UHFFFAOYSA-N	20144841
Cinnamomi Cortex (Rougui)	MOL000234	L-Limonen	38.0934	0.022306	XMGQYMWWDOXHJM-SNVBAGLBSA-N	439250
Cinnamomi Cortex (Rougui)	MOL000247	(Z,Z)-farnesol	41.1358	0.058711	CRDAMVZIKSXKFV-FBXUGWQNSA-N	1549107
Cinnamomi Cortex (Rougui)	MOL000249	Methylcinnamate	18.4175	0.035378	CCRCUPLGCSFEDV-BQYQJAHWSA-N	637520
Cinnamomi Cortex (Rougui)	MOL000250	cis-Cinnamaldehyde	27.2107	0.022639	KJPRLNWUNMBNBZ-DAXSKMNVSA-N	6428995
Cinnamomi Cortex (Rougui)	MOL000254	eugenol	56.2419	0.036518	RRAFCDWBNXTKKO-UHFFFAOYSA-N	3314
Cinnamomi Cortex (Rougui)	MOL000266	beta-Cubebene	32.8133	0.10858	FSRZGYRCMPZNJF-KHMAMNHCSA-N	0
Cinnamomi Cortex (Rougui)	MOL000431	coumarin	29.1676	0.043014	ZYGHJZDHTFUPRJ-UHFFFAOYSA-N	323
Cinnamomi Cortex (Rougui)	MOL000475	anethole	32.4923	0.02782	RUVINXPYWBROJD-ONEGZZNKSA-N	637563
Cinnamomi Cortex (Rougui)	MOL000479	Farnesene	17.4181	0.047569	JSNRRGGBADWTMC-NTCAYCPXSA-N	5281517
Cinnamomi Cortex (Rougui)	MOL000489	(1S,4aR,8aR)-1-isopropyl-7-methyl-4-methylene-2,3,4a,5,6,8a-hexahydro-1H-naphthalene	19.8025	0.077344	WRHGORWNJGOVQY-KKUMJFAQSA-N	6432404
Cinnamomi Cortex (Rougui)	MOL000608	()-Terpinen-4-ol	81.4067	0.032323	WRYLYDPHFGVWKC-SNVBAGLBSA-N	2724161
Cinnamomi Cortex (Rougui)	MOL000612	(-)-alpha-cedrene	55.561	0.10498	IRAQOCYXUMOFCW-OSFYFWSMSA-N	0
Cinnamomi Cortex (Rougui)	MOL000615	delta-amorphene	17.9461	0.077173	FUCYIEXQVQJBKY-ZFWWWQNUSA-N	441005
Cinnamomi Cortex (Rougui)	MOL000666	hexanal	55.707	0.0055795	JARKCYVAAOWBJS-UHFFFAOYSA-N	6184
Cinnamomi Cortex (Rougui)	MOL000675	oleic acid	33.1284	0.14243	ZQPPMHVWECSIRJ-KTKRTIGZSA-N	445639
Cinnamomi Cortex (Rougui)	MOL000677	(1R,4R)-4-isopropyl-1,6-dimethyltetralin	17.4683	0.077611	PGTJIOWQJWHTJJ-CHWSQXEVSA-N	11298625
Cinnamomi Cortex (Rougui)	MOL000698	(R)-(-)-alpha-Phellandrene	27.5068	0.022258	OGLDWXZKYODSOB-SNVBAGLBSA-N	442482
Cinnamomi Cortex (Rougui)	MOL000699	m-Cymol	48.8517	0.022564	XCYJPXQACVEIOS-UHFFFAOYSA-N	10812
Cinnamomi Cortex (Rougui)	MOL000704	styrene	29.5454	0.013312	PPBRXRYQALVLMV-UHFFFAOYSA-N	7501
Cinnamomi Cortex (Rougui)	MOL000708	WLN: VHR	32.628	0.014163	HUMNYLRZRPPJDN-UHFFFAOYSA-N	240
Cinnamomi Cortex (Rougui)	MOL000860	stearic acid	17.8254	0.14086	QIQXTHQIDYTFRH-UHFFFAOYSA-N	5281
Cinnamomi Cortex (Rougui)	MOL000864	MYS	13.9811	0.04922	YCOZIPAWZNQLMR-UHFFFAOYSA-N	12391
Cinnamomi Cortex (Rougui)	MOL000868	LFA	8.46052	0.12999	CBFCDTFDPHXCNY-UHFFFAOYSA-N	8222
Cinnamomi Cortex (Rougui)	MOL000869	Henicosane	8.41291	0.15364	FNAZRRHPUDJQCJ-UHFFFAOYSA-N	12403
Cinnamomi Cortex (Rougui)	MOL000885	Dodekan	17.7374	0.02413	SNRUBQQJIBEYMU-UHFFFAOYSA-N	8182
Cinnamomi Cortex (Rougui)	MOL000911	Terpilene	33.9508	0.022228	YHQGMYUVUMAZJR-UHFFFAOYSA-N	7462
Cinnamomi Cortex (Rougui)	MOL000927	α-muurolene	17.2437	0.077298	QMAYBMKBYCGXDH-RBSFLKMASA-N	0
Cinnamomi Cortex (Rougui)	MOL000932	alpha-Farnesene	21.7035	0.047239	CXENHBSYCFFKJS-VDQVFBMKSA-N	5281516
Cinnamomi Cortex (Rougui)	MOL000991	cinnamaldehyde	31.9904	0.02266	KJPRLNWUNMBNBZ-QPJJXVBHSA-N	637511
Cinnamomi Cortex (Rougui)	MOL001123	muurolene	19.4975	0.077245	QMAYBMKBYCGXDH-ZNMIVQPWSA-N	12306047
Cinnamomi Cortex (Rougui)	MOL001201	(1R,5R,7S)-4,7-dimethyl-7-(4-methylpent-3-enyl)bicyclo[3.1.1]hept-3-ene	16.2256	0.090114	YMBFCQPIMVLNIU-KFWWJZLASA-N	13889654
Cinnamomi Cortex (Rougui)	MOL001237	o-Acetyltoluene	38.961	0.024841	YXWWHNCQZBVZPV-UHFFFAOYSA-N	11340
Cinnamomi Cortex (Rougui)	MOL001300	PEL	44.0342	0.017357	WRMNZCZEMHIOCP-UHFFFAOYSA-N	6054
Cinnamomi Cortex (Rougui)	MOL001393	myristic acid	21.1812	0.066784	TUNFSRHWOTWDNC-UHFFFAOYSA-N	11005
Cinnamomi Cortex (Rougui)	MOL001578	Hypnon	48.1926	0.018645	KWOLFJPFCHCOCG-UHFFFAOYSA-N	7410
Cinnamomi Cortex (Rougui)	MOL001579	germacrene	15.0584	0.056031	IQSPYJZCWMAJLU-CYSUXKILSA-N	0
Cinnamomi Cortex (Rougui)	MOL001599	α-cubebol	64.8052	0.085702	BOBTWVZHSPRDFC-OUCADQQQSA-N	0
Cinnamomi Cortex (Rougui)	MOL001600	copaene	29.4734	0.12401	VLXDPFLIRFYIME-QRTUWBSPSA-N	0
Cinnamomi Cortex (Rougui)	MOL001602	1,4-cadinadiene	16.7325	0.077185	JUQGWBAOQUBVFP-GZBFAFLISA-N	50986185
Cinnamomi Cortex (Rougui)	MOL001619	UPL	8.5205	0.10901	LQERIDTXQFOHKA-UHFFFAOYSA-N	12401
Cinnamomi Cortex (Rougui)	MOL001739	zoomaric acid	35.7759	0.099334	SECPZKHBENQXJG-FPLPWBNLSA-N	445638
Cinnamomi Cortex (Rougui)	MOL001853	2-Acetyl-6-methoxynaphthalene	17.4643	0.083766	GGWCZBGAIGGTDA-UHFFFAOYSA-N	77506
Cinnamomi Cortex (Rougui)	MOL001862	Cadalin	12.9631	0.078803	VMOJIHDTVZTGDO-UHFFFAOYSA-N	10225
Cinnamomi Cortex (Rougui)	MOL002003	(-)-Caryophyllene oxide	32.6701	0.12925	NVEQFIOZRFFVFW-GUIRCDHDSA-N	0
Cinnamomi Cortex (Rougui)	MOL002085	alpha-Cubebene	16.7321	0.10854	XUEHVOLRMXNRKQ-KHMAMNHCSA-N	0
Cinnamomi Cortex (Rougui)	MOL002225	Styrone	38.3522	0.022038	OOCCDEMITAIZTP-QPJJXVBHSA-N	5315892
Cinnamomi Cortex (Rougui)	MOL002295	cinnamic acid	19.6825	0.029479	WBYWAXJHAXSJNI-VOTSOKGWSA-N	444539
Cinnamomi Cortex (Rougui)	MOL002458	ZINC01850974	78.8588	0.050454	IAIHUHQCLTYTSF-QXFUBDJGSA-N	6973643
Cinnamomi Cortex (Rougui)	MOL002496	Sulcatone	26.3591	0.012095	UHEPJGULSIKKTP-UHFFFAOYSA-N	9862
Cinnamomi Cortex (Rougui)	MOL002502	copaene	24.0841	0.124	VLXDPFLIRFYIME-AIEDFZFUSA-N	0
Cinnamomi Cortex (Rougui)	MOL002526	3691-11-0	23.6559	0.072163	YHAJBLWYOIUHHM-GUTXKFCHSA-N	94275
Cinnamomi Cortex (Rougui)	MOL002541	WLN: VH2R	19.0143	0.022234	YGCZTXZTJXYWCO-UHFFFAOYSA-N	7707
Cinnamomi Cortex (Rougui)	MOL002697	junipene	44.0737	0.10826	PDSNLYSELAIEBU-ABHRYQDASA-N	0
Cinnamomi Cortex (Rougui)	MOL002836	anisaldehyde	21.5377	0.024497	ZRSNZINYAWTAHE-UHFFFAOYSA-N	31244
Cinnamomi Cortex (Rougui)	MOL002841	l-alpha-Fenchone	72.639	0.050709	LHXDLQBQYFFVNW-OIBJUYFYSA-N	82229
Cinnamomi Cortex (Rougui)	MOL002972	(4S)-1-methyl-4-(6-methylhepta-1,5-dien-2-yl)cyclohexene	20.3016	0.055521	XZRVRYFILCSYSP-OAHLLOKOSA-N	10104370
Cinnamomi Cortex (Rougui)	MOL003032	BZM	18.6385	0.085753	SESFRYSPDFLNCH-UHFFFAOYSA-N	2345
Cinnamomi Cortex (Rougui)	MOL003047	[(1S)-endo]-(-)-Borneol	83.5449	0.05275	DTGKSKDOIYIVQL-QXFUBDJGSA-N	1201518
Cinnamomi Cortex (Rougui)	MOL003521	Isohomogenol	32.6114	0.042661	NNWHUJCUHAELCL-SNAWJCMRSA-N	637776
Cinnamomi Cortex (Rougui)	MOL003522	()-Sativene	37.4136	0.10495	VOBBUADSYROGAT-VYDRJRHOSA-N	0
Cinnamomi Cortex (Rougui)	MOL003523	hexadec-11-enal	31.7088	0.08079	AMTITFMUKRZZEE-AATRIKPKSA-N	5283376
Cinnamomi Cortex (Rougui)	MOL003524	Benzenepropanol	36.5721	0.021644	VAJVDSVGBWFCLW-UHFFFAOYSA-N	31234
Cinnamomi Cortex (Rougui)	MOL003525	Pyruvophenone	35.9335	0.030245	BVQVLAIMHVDZEL-UHFFFAOYSA-N	11363
Cinnamomi Cortex (Rougui)	MOL003526	Cinnamyl acetate	21.149	0.044127	WJSDHUCWMSHDCR-VMPITWQZSA-N	5282110
Cinnamomi Cortex (Rougui)	MOL003527	Tyranton	58.3365	0.012407	SWXVUIWOUIDPGS-UHFFFAOYSA-N	31256
Cinnamomi Cortex (Rougui)	MOL003528	METHYLBENZOFURAN	54.3526	0.032204	GBGPVUAOTCNZPT-UHFFFAOYSA-N	20263
Cinnamomi Cortex (Rougui)	MOL003529	m-Methylacetophenone	40.6256	0.023942	FSPSELPMWGWDRY-UHFFFAOYSA-N	11455
Cinnamomi Cortex (Rougui)	MOL003530	O-METHOXYCINNAMALDEHYDE	26.5216	0.037152	KKVZAVRSVHUSPL-GQCTYLIASA-N	641298
Cinnamomi Cortex (Rougui)	MOL003531	3-methoxycinnamaldehyde	54.6512	0.036522	XHYAQFCRAQUBTD-HYXAFXHYSA-N	20979959
Cinnamomi Cortex (Rougui)	MOL003532	(1R)-1-(4-methylphenyl)ethanol	23.6423	0.023472	JESIHYIJKKUWIS-MRVPVSSYSA-N	6999807
Cinnamomi Cortex (Rougui)	MOL003533	Bicyclo[4.4.0]dec-1-ene,2-isopropy-5-methyl-9-methylene-	19.777	0.077235	FTSINDMZMFBWFS-JSGCOSHPSA-N	0
Cinnamomi Cortex (Rougui)	MOL003534	CADINENE	17.1183	0.077374	USDOQCCMRDNVAH-KKUMJFAQSA-N	10657
Cinnamomi Cortex (Rougui)	MOL003535	1,1,6-trimethyl-2H-naphthalene	24.9373	0.061599	RTUMCNDCAVLXEP-UHFFFAOYSA-N	121677
Cinnamomi Cortex (Rougui)	MOL003536	T-Cadinol	28.595	0.093146	LHYHMMRYTDARSZ-XQLPTFJDSA-N	160799
Cinnamomi Cortex (Rougui)	MOL003537	T-Muurolol	30.4145	0.093121	LHYHMMRYTDARSZ-AJNGGQMLSA-N	3084331
Cinnamomi Cortex (Rougui)	MOL003538	()-Ledene	51.8442	0.10403	WGTRJVCFDUCKCM-FMKGYKFTSA-N	10910653

## Sheet: candidate compounds
Information of candidate compounds of five herbal medicines in WWQZS after screening
Herbal Medicine Source	MOL ID	Molecule Name	OB	DL	Inchikey	PubChem Cid
Granati Fructus(Shiliu)	MOL000006	luteolin	36.1626	0.24552	IQPNAANSBPBGFQ-UHFFFAOYSA-N	5280445
Granati Fructus(Shiliu)	MOL000098	quercetin	46.4333	0.27525	REFJWTPEDVJJIY-UHFFFAOYSA-N	5280343
Granati Fructus(Shiliu)	MOL000105	protocatechuic acid	25.3665	0.035092	YQUVCSBJEUQKSH-UHFFFAOYSA-N	72
Granati Fructus(Shiliu)	MOL000131	EIC	41.9044	0.14347	OYHQOLUKZRVURQ-HZJYTTRNSA-N	5280450
Granati Fructus(Shiliu)	MOL000263	oleanolic acid	29.0208	0.75599	MIJYXULNPSFWEK-GTOFXWBISA-N	10494
Granati Fructus(Shiliu)	MOL000358	beta-sitosterol	36.9139	0.75123	KZJWDPNRJALLNS-VJSFXXLFSA-N	222284
Granati Fructus(Shiliu)	MOL000414	Caffeate	54.9705	0.050036	QAIPRVGONGVQAS-RQOWECAXSA-N	1549111
Granati Fructus(Shiliu)	MOL000415	rutin	3.20153	0.68283	IKGXIBQEEMLURG-NVPNHPEKSA-N	5280805
Granati Fructus(Shiliu)	MOL000422	kaempferol	41.8822	0.24066	IYRMWMYZSQPJKC-UHFFFAOYSA-N	5280863
Granati Fructus(Shiliu)	MOL000432	linolenic acid	45.0091	0.14709	DTOSIQBPPRVQHS-PDBXOOCHSA-N	5280934
Granati Fructus(Shiliu)	MOL000437	Hirsutrin	1.85808	0.76904	OVSQVDMCBVZWGM-QSOFNFLRSA-N	5280804
Granati Fructus(Shiliu)	MOL000492	(+)-catechin	54.8264	0.24164	PFTAWBLQPZVEMU-DZGCQCFKSA-N	9064
Granati Fructus(Shiliu)	MOL000511	ursolic acid	16.7749	0.75457	WCGUUGGRBIKTOS-GPOJBZKASA-N	64945
Granati Fructus(Shiliu)	MOL000513	3,4,5-trihydroxybenzoic acid	31.6913	0.044562	LNTHITQWFMADLM-UHFFFAOYSA-N	370
Granati Fructus(Shiliu)	MOL000561	Astragalin	14.0268	0.73616	JPUKWEQWGBDDQB-QSOFNFLRSA-N	5282102
Granati Fructus(Shiliu)	MOL000749	Linoleic	41.9044	0.14468	OYHQOLUKZRVURQ-AVQMFFATSA-N	5282457
Granati Fructus(Shiliu)	MOL000935	Hepanal	53.8332	0.10397	SPCXZDDGSGTVAW-XIDUGBJDSA-N	15560276
Granati Fructus(Shiliu)	MOL001002	ellagic acid	43.0646	0.43417	AFSDNFLWKVMVRB-UHFFFAOYSA-N	0
Granati Fructus(Shiliu)	MOL001300	PEL	44.0342	0.017357	WRMNZCZEMHIOCP-UHFFFAOYSA-N	6054
Granati Fructus(Shiliu)	MOL001308	oleic acid	33.1284	0.14262	ZQPPMHVWECSIRJ-MDZDMXLPSA-N	637517
Granati Fructus(Shiliu)	MOL001578	Hypnon	48.1926	0.018645	KWOLFJPFCHCOCG-UHFFFAOYSA-N	7410
Granati Fructus(Shiliu)	MOL001717	PELTATIN B	24.0724	0.86507	HLBPOYVRLSXWJJ-PDSMFRHLSA-N	92122
Granati Fructus(Shiliu)	MOL001906	Methylgallate	30.9079	0.051049	FBSFWRHWHYMIOG-UHFFFAOYSA-N	7428
Granati Fructus(Shiliu)	MOL002077	1-[(2S)-2-piperidyl]acetone	53.8629	0.021408	JEIZLWNUBXHADF-QMMMGPOBSA-N	10313185
Granati Fructus(Shiliu)	MOL002683	Ligla	45.0091	0.14562	VZCCETWTMQHEPK-QNEBEIHSSA-N	5280933
Granati Fructus(Shiliu)	MOL002850	butylated hydroxytoluene	40.0203	0.071985	NLZUEZXRPGMBCV-UHFFFAOYSA-N	31404
Granati Fructus(Shiliu)	MOL003395	(3S,8S,9S,10R,13R,14S,17R)-17-[(1R,4R)-1,4-dimethylhexyl]-10,13-dimethyl-2,3,4,7,8,9,11,12,14,15,16,17-dodecahydro-1H-cyclopenta[a]phenanthren-3-ol	11.3264	0.67309	BUFUFDXBXMUAJU-YSQMORBQSA-N	21670847
Granati Fructus(Shiliu)	MOL004800	pelargonidin-3-O-glucoside	38.716	0.71362	FMGSJXMXTCFPGR-GQUPQBGVSA-N	0
Granati Fructus(Shiliu)	MOL004807	glucuronic acid	46.1828	0.055111	AEMOLEFTQBMNLQ-QIUUJYRFSA-N	441478
Granati Fructus(Shiliu)	MOL005858	3,7,8-Tri-O-methylellagic acid	37.5422	0.57278	LXEQIOGTMDLLEC-UHFFFAOYSA-N	0
Granati Fructus(Shiliu)	MOL006505	(-)-epicatechin	28.9348	0.24163	PFTAWBLQPZVEMU-UKRRQHHQSA-N	72276
Granati Fructus(Shiliu)	MOL009271	09762_FLUKA	43.6355	0.041811	RHWSKVCZXBAWLZ-OCAPTIKFSA-N	6602484
Granati Fructus(Shiliu)	MOL009274	Fritillaziebinol	55.0465	0.33853	BOHSULPVIZQJSM-URTLRTLISA-N	0
Granati Fructus(Shiliu)	MOL011039	Vaccenic acid	33.1284	0.14284	UWHZIFQPPBDJPM-BQYQJAHWSA-N	5281127
Carthami Flos (Honghua)	MOL000006	luteolin	36.1626	0.24552	IQPNAANSBPBGFQ-UHFFFAOYSA-N	5280445
Carthami Flos (Honghua)	MOL000008	apigenin	23.0622	0.21306	KZNIFHPLKGYRTM-UHFFFAOYSA-N	5280443
Carthami Flos (Honghua)	MOL000024	alpha-humulene	22.9768	0.061124	FAMPSKZZVDUYOS-HRGUGZIWSA-N	5281520
Carthami Flos (Honghua)	MOL000036	beta-caryophyllene	29.7023	0.089893	NPNUFJAVOOONJE-GFUGXAQUSA-N	5281515
Carthami Flos (Honghua)	MOL000098	quercetin	46.4333	0.27525	REFJWTPEDVJJIY-UHFFFAOYSA-N	5280343
Carthami Flos (Honghua)	MOL000131	EIC	41.9044	0.14347	OYHQOLUKZRVURQ-HZJYTTRNSA-N	5280450
Carthami Flos (Honghua)	MOL000222	terephthaldehyde	11.9327	0.32639	CWVRJTMFETXNAD-BBDSCLQGSA-N	7067335
Carthami Flos (Honghua)	MOL000223	caffeic acid	25.7644	0.050089	QAIPRVGONGVQAS-DUXPYHPUSA-N	689043
Carthami Flos (Honghua)	MOL000286	β-amyrin acetate	9.10739	0.74014	UMRPOGLIBDXFNK-OAPBINRDSA-N	51398127
Carthami Flos (Honghua)	MOL000340	HCI	35.8319	0.028973	XMIIGOLPHOKFCH-UHFFFAOYSA-N	107
Carthami Flos (Honghua)	MOL000347	Syrigin	14.6369	0.32496	QJVXKWHHAMZTBY-GCPOEHJPSA-N	5316860
Carthami Flos (Honghua)	MOL000348	4-[(Z)-3-hydroxyprop-1-enyl]-2,6-dimethoxyphenol	49.1473	0.064947	LZFOPEXOUVTGJS-ARJAWSKDSA-N	10130521
Carthami Flos (Honghua)	MOL000356	lupeol	12.1208	0.77716	MQYXUWHLBZFQQO-QGTGJCAVSA-N	259846
Carthami Flos (Honghua)	MOL000357	Sitogluside	20.6319	0.6241	NPJICTMALKLTFW-OFUAXYCQSA-N	5742590
Carthami Flos (Honghua)	MOL000358	beta-sitosterol	36.9139	0.75123	KZJWDPNRJALLNS-VJSFXXLFSA-N	222284
Carthami Flos (Honghua)	MOL000360	FER	39.5585	0.058069	KSEBMYQBYZTDHS-HWKANZROSA-N	445858
Carthami Flos (Honghua)	MOL000396	(+)-Syringaresinol	3.29171	0.72244	KOWMJRJXZMEZLD-HCIHMXRSSA-N	443023
Carthami Flos (Honghua)	MOL000415	rutin	3.20153	0.68283	IKGXIBQEEMLURG-NVPNHPEKSA-N	5280805
Carthami Flos (Honghua)	MOL000422	kaempferol	41.8822	0.24066	IYRMWMYZSQPJKC-UHFFFAOYSA-N	5280863
Carthami Flos (Honghua)	MOL000432	linolenic acid	45.0091	0.14709	DTOSIQBPPRVQHS-PDBXOOCHSA-N	5280934
Carthami Flos (Honghua)	MOL000449	Stigmasterol	43.8299	0.75665	HCXVJBMSMIARIN-PHZDYDNGSA-N	5280794
Carthami Flos (Honghua)	MOL000561	Astragalin	14.0268	0.73616	JPUKWEQWGBDDQB-QSOFNFLRSA-N	5282102
Carthami Flos (Honghua)	MOL000608	()-Terpinen-4-ol	81.4067	0.032323	WRYLYDPHFGVWKC-SNVBAGLBSA-N	2724161
Carthami Flos (Honghua)	MOL000612	(-)-alpha-cedrene	55.561	0.10498	IRAQOCYXUMOFCW-OSFYFWSMSA-N	0
Carthami Flos (Honghua)	MOL000675	oleic acid	33.1284	0.14243	ZQPPMHVWECSIRJ-KTKRTIGZSA-N	445639
Carthami Flos (Honghua)	MOL000714	Hyacinthin	38.6465	0.017812	DTUQWGWMVIHBKE-UHFFFAOYSA-N	998
Carthami Flos (Honghua)	MOL000748	HMF	45.0661	0.019427	NOEGNKMFWQHSLB-UHFFFAOYSA-N	237332
Carthami Flos (Honghua)	MOL000953	CLR	37.8739	0.67677	HVYWMOMLDIMFJA-DPAQBDIFSA-N	5997
Carthami Flos (Honghua)	MOL001129	l-Verbenone	50.6606	0.061837	DCSCXTJOXBUFGB-JGVFFNPUSA-N	92874
Carthami Flos (Honghua)	MOL001387	(7aS)-4,4,7a-trimethyl-6,7-dihydro-5H-benzofuran-2-one	36.8366	0.065044	IMKHDCBNRDRUEB-NSHDSACASA-N	157995
Carthami Flos (Honghua)	MOL001398	Methyllinolenate	46.153	0.17063	DVWSXZIHSUZZKJ-YSTUJMKBSA-N	5319706
Carthami Flos (Honghua)	MOL001442	phytol	33.8244	0.13342	BOTWFXYSPFMFNR-PYDDKJGSSA-N	5280435
Carthami Flos (Honghua)	MOL001695	Quercimeritrin (6CI,7CI,8CI)	2.84847	0.79299	BBFYUPYFXSSMNV-HMGRVEAOSA-N	5282160
Carthami Flos (Honghua)	MOL001771	poriferast-5-en-3beta-ol	36.9139	0.75034	KZJWDPNRJALLNS-FBZNIEFRSA-N	457801
Carthami Flos (Honghua)	MOL001787	ADO	15.9823	0.17865	OIRDTQYFTABQOQ-KQYNXXCUSA-N	60961
Carthami Flos (Honghua)	MOL001788	adenine	62.8058	0.034822	GFFGJBXGBJISGV-UHFFFAOYSA-N	190
Carthami Flos (Honghua)	MOL001801	salicylic acid	32.127	0.027213	YGSDEFSMJLZEOE-UHFFFAOYSA-N	338
Carthami Flos (Honghua)	MOL001955	Heriguard	11.9327	0.32642	CWVRJTMFETXNAD-JUHZACGLSA-N	1794427
Carthami Flos (Honghua)	MOL002003	(-)-Caryophyllene oxide	32.6701	0.12925	NVEQFIOZRFFVFW-GUIRCDHDSA-N	0
Carthami Flos (Honghua)	MOL002008	myricetin	13.7483	0.31057	IKMDFBPHZNJCSN-UHFFFAOYSA-N	5281672
Carthami Flos (Honghua)	MOL002683	Ligla	45.0091	0.14562	VZCCETWTMQHEPK-QNEBEIHSSA-N	5280933
Carthami Flos (Honghua)	MOL002684	gamma-Tocotrienol	20.3049	0.53282	OTXNTMVVOOBZCV-WAZJVIJMSA-N	5282349
Carthami Flos (Honghua)	MOL002692	Amoenin A3	3.32187	0.73616	JPUKWEQWGBDDQB-FHYQVQSVSA-N	5742687
Carthami Flos (Honghua)	MOL002693	nicotiflorin	3.63711	0.72565	RTATXGUCZHCSNG-QHWHWDPRSA-N	5318767
Carthami Flos (Honghua)	MOL002694	4-[(E)-4-(3,5-dimethoxy-4-oxo-1-cyclohexa-2,5-dienylidene)but-2-enylidene]-2,6-dimethoxycyclohexa-2,5-dien-1-one	48.4663	0.36494	KQTQOJWCKLPTGL-AATRIKPKSA-N	10237057
Carthami Flos (Honghua)	MOL002695	lignan	43.3182	0.65067	PEIBIXYUYBVLDS-LACYOAMESA-N	0
Carthami Flos (Honghua)	MOL002697	junipene	44.0737	0.10826	PDSNLYSELAIEBU-ABHRYQDASA-N	0
Carthami Flos (Honghua)	MOL002701	neocarthamin	17.8127	0.77017	UBFTZAGDGOMJQE-SACPXRHSSA-N	46173973
Carthami Flos (Honghua)	MOL002704	D-Phenylalanine	92.8603	0.036064	COLNVLDHVKWLRT-MRVPVSSYSA-N	6919011
Carthami Flos (Honghua)	MOL002710	Pyrethrin II	48.3571	0.35025	VJFUPGQZSXIULQ-XIGJTORUSA-N	5281555
Carthami Flos (Honghua)	MOL002712	6-Hydroxykaempferol	62.1327	0.27266	LFPHMXIOQBBTSS-UHFFFAOYSA-N	5281638
Carthami Flos (Honghua)	MOL002714	baicalein	33.5189	0.20888	FXNFHKRTJBSTCS-UHFFFAOYSA-N	5281605
Carthami Flos (Honghua)	MOL002717	qt_carthamone	51.0258	0.20055	ZWTHNQBQIXDGOG-ZZXKWVIFSA-N	0
Carthami Flos (Honghua)	MOL002721	quercetagetin	45.007	0.30991	ZVOLCUVKHLEPEV-UHFFFAOYSA-N	5281680
Carthami Flos (Honghua)	MOL002722	Vomifoliol	29.0142	0.08234	KPQMCAKZRXOZLB-KOIHBYQTSA-N	5280462
Carthami Flos (Honghua)	MOL002731	(4S)-4-hydroxy-3,5,5-trimethyl-4-[(E,3R)-3-[(2R,3R,4S,5S,6R)-3,4,5-trihydroxy-6-(hydroxymethyl)tetrahydropyran-2-yl]oxybut-1-enyl]cyclohex-2-en-1-one	10.8094	0.36406	SWYRVCGNMNAFEK-MHXFFUGFSA-N	9930064
Carthami Flos (Honghua)	MOL002737	scutellarein	18.9736	0.24387	JVXZRQGOGOXCEC-UHFFFAOYSA-N	5281697
Carthami Flos (Honghua)	MOL002746	L-2-Amino-3-(5-hydroxyindolyl)propionic acid	74.6294	0.097646	LDCYZAJDBXYCGN-VIFPVBQESA-N	6971044
Carthami Flos (Honghua)	MOL002753	6-hydroxykaempferol-3-O-glucoside	1.96805	0.75634	DIYGQKBUNSAYQA-AWULYWAKSA-N	25017112
Carthami Flos (Honghua)	MOL002757	7,8-dimethyl-1H-pyrimido[5,6-g]quinoxaline-2,4-dione	45.7509	0.18605	DIFBPHXISHQENP-UHFFFAOYSA-N	21786815
Carthami Flos (Honghua)	MOL002764	MEGxp0_000365	1.44981	0.53248	PFDVWJCSCYDRMZ-AUCPOXKISA-N	14777879
Carthami Flos (Honghua)	MOL002765	N1,N5-(Z)-N10-(E)-tri-p-coumaroylspermidine	1.44981	0.53163	PFDVWJCSCYDRMZ-XWBZMVROSA-N	50942902
Carthami Flos (Honghua)	MOL002771	VIV	14.2646	0.55443	GVJHHUAWPYXKBD-IEOSBIPESA-N	14985
Carthami Flos (Honghua)	MOL002773	beta-carotene	37.1843	0.58358	OENHQHLEOONYIE-JLTXGRSLSA-N	5280489
Carthami Flos (Honghua)	MOL002775	5,8-dimethyltocol	15.621	0.52106	WGVKWNUPNGFDFJ-DQCZWYHMSA-N	6857447
Carthami Flos (Honghua)	MOL002776	Baicalin	40.1236	0.75264	IKIIZLYTISPENI-ZFORQUDYSA-N	64982
Carthami Flos (Honghua)	MOL002778	THZ	70.3331	0.025246	IOJUPLGTWVMSFF-UHFFFAOYSA-N	7222
Carthami Flos (Honghua)	MOL002783	Cumalic acid	43.0983	0.028014	ORGPJDKNYMVLFL-UHFFFAOYSA-N	68141
Piperis Longi Fructus(Bibo)	MOL000018	(+/-)-Isoborneol	86.9841	0.05275	DTGKSKDOIYIVQL-MRTMQBJTSA-N	6321405
Piperis Longi Fructus(Bibo)	MOL000024	alpha-humulene	22.9768	0.061124	FAMPSKZZVDUYOS-HRGUGZIWSA-N	5281520
Piperis Longi Fructus(Bibo)	MOL000122	1,8-cineole	39.7292	0.049041	WEEGYLXZBRQIMU-WAAGHKOSSA-N	2758
Piperis Longi Fructus(Bibo)	MOL000125	(-)-alpha-Pinene	46.2498	0.052565	GRWFGVWFFZKLTI-IUCAKERBSA-N	440968
Piperis Longi Fructus(Bibo)	MOL000126	(-)-nopinene	44.8353	0.052595	WTARULDDTDQWMU-IUCAKERBSA-N	440967
Piperis Longi Fructus(Bibo)	MOL000130	CAM	67.1738	0.053027	DSSYKIVIOFKYAU-XCBNKYQSSA-N	159055
Piperis Longi Fructus(Bibo)	MOL000202	Moslene	33.0164	0.02224	YKFLAYDHMOASIY-UHFFFAOYSA-N	7461
Piperis Longi Fructus(Bibo)	MOL000204	-cis-.beta.-Elemene diastereomer	28.6213	0.060524	OPFTUNCRGUEPRZ-RBSFLKMASA-N	6431152
Piperis Longi Fructus(Bibo)	MOL000206	isoeugenol	70.1003	0.036329	BJIOGJUNALELMI-ONEGZZNKSA-N	853433
Piperis Longi Fructus(Bibo)	MOL000266	beta-Cubebene	32.8133	0.10858	FSRZGYRCMPZNJF-KHMAMNHCSA-N	0
Piperis Longi Fructus(Bibo)	MOL000268	(1S,5S)-1-isopropyl-4-methylenebicyclo[3.1.0]hexane	46.2051	0.043544	NDVASEGYNIMXJL-UWVGGRQHSA-N	11051711
Piperis Longi Fructus(Bibo)	MOL000270	CHEBI:7	45.1981	0.04265	BQOFWKZOCNGFEC-BDAKNGLRSA-N	443156
Piperis Longi Fructus(Bibo)	MOL000340	HCI	35.8319	0.028973	XMIIGOLPHOKFCH-UHFFFAOYSA-N	107
Piperis Longi Fructus(Bibo)	MOL000475	anethole	32.4923	0.02782	RUVINXPYWBROJD-ONEGZZNKSA-N	637563
Piperis Longi Fructus(Bibo)	MOL000608	()-Terpinen-4-ol	81.4067	0.032323	WRYLYDPHFGVWKC-SNVBAGLBSA-N	2724161
Piperis Longi Fructus(Bibo)	MOL000612	(-)-alpha-cedrene	55.561	0.10498	IRAQOCYXUMOFCW-OSFYFWSMSA-N	0
Piperis Longi Fructus(Bibo)	MOL000968	beta-Bisabolene	29.5897	0.055235	XZRVRYFILCSYSP-HNNXBMFYSA-N	68128
Piperis Longi Fructus(Bibo)	MOL001201	(1R,5R,7S)-4,7-dimethyl-7-(4-methylpent-3-enyl)bicyclo[3.1.1]hept-3-ene	16.2256	0.090114	YMBFCQPIMVLNIU-KFWWJZLASA-N	13889654
Piperis Longi Fructus(Bibo)	MOL001555	ZINC03996196	52.3456	0.62037	PEUUVVGQIVMSAW-AJAKECSLSA-N	7299790
Piperis Longi Fructus(Bibo)	MOL001556	Isocaryophyllene	27.3023	0.089903	NPNUFJAVOOONJE-FLFDDASRSA-N	5281522
Piperis Longi Fructus(Bibo)	MOL001558	sesamin	56.5471	0.82722	PEYUIKBAABKQKQ-AFHBHXEDSA-N	72307
Piperis Longi Fructus(Bibo)	MOL001559	piperlonguminine	30.7114	0.1802	WHAAPCGHVWVUEX-GGWOSOGESA-N	5320621
Piperis Longi Fructus(Bibo)	MOL001560	pipernonaline	51.3157	0.4092	PKLGRWSJBLGIBF-NAKBGQTNSA-N	0
Piperis Longi Fructus(Bibo)	MOL001561	dehydropipernonaline	47.7287	0.41207	KAYVDASZRFLFRZ-XRPSMPKOSA-N	0
Piperis Longi Fructus(Bibo)	MOL001566	calarene	52.1627	0.11399	MBIPADCEHSKJDQ-MUYACECFSA-N	15560279
Piperis Longi Fructus(Bibo)	MOL001575	cedryl acetate	53.9362	0.1725	OETMLOBORLMQPE-YIUHCBHRSA-N	0
Piperis Longi Fructus(Bibo)	MOL001577	Dodecahydropyrido [1,2-b]isoquinolin -6-one	61.2915	0.1116	OLWPUTPKEBKCOC-SRVKXCTJSA-N	0
Piperis Longi Fructus(Bibo)	MOL001578	Hypnon	48.1926	0.018645	KWOLFJPFCHCOCG-UHFFFAOYSA-N	7410
Piperis Longi Fructus(Bibo)	MOL001580	Piperonal	32.7378	0.041821	SATCULPHIDQDRE-UHFFFAOYSA-N	8438
Piperis Longi Fructus(Bibo)	MOL001586	N-(2,5-dimethoxyphenyl)-4-methoxybenzamide	60.6974	0.18097	CFFUCEHTAUTSAT-UHFFFAOYSA-N	532276
Piperis Longi Fructus(Bibo)	MOL001587	(E)-5-(4-hydroxy-3-methoxy-phenyl)-1-piperidino-pent-2-en-1-one	10.9665	0.18813	VHTQQWCWSZHGTL-XBXARRHUSA-N	11630663
Piperis Longi Fructus(Bibo)	MOL001588	N-isobutyleicosa-2(E),4(E),8(Z)-trienamide	44.4846	0.32311	WBBCNGSATYECFE-VPDWFJFDSA-N	0
Piperis Longi Fructus(Bibo)	MOL001589	N-Isobutyl-2,4-icosadienamide	38.8553	0.31929	LMZPUHBJSQVRHE-HYGARKJASA-N	6441067
Piperis Longi Fructus(Bibo)	MOL001591	p-Amino-o-cresol	68.303	0.02062	HDGMAACKJSBLMW-UHFFFAOYSA-N	76081
Piperis Longi Fructus(Bibo)	MOL001592	piperine	42.5167	0.23406	MXXWOMGUGJBKIW-YPCIICBESA-N	638024
Piperis Longi Fructus(Bibo)	MOL001593	Piperitenone	40.0544	0.030051	HKZQJZIFODOLFR-UHFFFAOYSA-N	381152
Piperis Longi Fructus(Bibo)	MOL001594	Pisatin	88.0501	0.64232	LZMRDTLRSDRUSU-SJORKVTESA-N	0
Piperis Longi Fructus(Bibo)	MOL001595	sesamol	66.3392	0.034314	LUSZGTFNYDARNI-UHFFFAOYSA-N	68289
Piperis Longi Fructus(Bibo)	MOL001597	Tetradecahydro-1-methylphenanthrene	37.5146	0.10985	SWDNSUKBMAGLLL-JARUQAPTSA-N	0
Piperis Longi Fructus(Bibo)	MOL001601	1,2,5,6-tetrahydrotanshinone	38.7454	0.35791	AZIUYJPOBCMPON-SNVBAGLBSA-N	0
Piperis Longi Fructus(Bibo)	MOL001605	cis-2-Decalone	43.8248	0.040057	LGVJRKCQQHOWAU-DTWKUNHWSA-N	246289
Piperis Longi Fructus(Bibo)	MOL001606	BB_NC-0668	35.5721	0.082297	QEBNYNLSCGVZOH-NFAWXSAZSA-N	9855795
Piperis Longi Fructus(Bibo)	MOL001607	ZINC03982454	36.9139	0.75559	KZJWDPNRJALLNS-ZGFRWYMBSA-N	11870467
Piperis Longi Fructus(Bibo)	MOL001608	delta-elemene	26.9786	0.060201	MXDMETWAEGIFOE-CABCVRRESA-N	12309449
Piperis Longi Fructus(Bibo)	MOL001610	sylvatine	43.9967	0.50977	URFYPQQKBYOWIX-SWZGVYIDSA-N	0
Piperis Longi Fructus(Bibo)	MOL001611	dihydropiperlonguminine	26.6649	0.17855	CSGDXLXTJVRNEA-GQCTYLIASA-N	12682184
Piperis Longi Fructus(Bibo)	MOL001612	PIPERONYLIC ACID	56.943	0.051718	VDVJGIYXDVPQLP-UHFFFAOYSA-N	7196
Piperis Longi Fructus(Bibo)	MOL001614	(E,E,E)-11-(1,3-Benzodioxol-5-yl)-N-(2-methylpropyl)-2,4,10-undecatrienenamide	42.7228	0.43055	ZNCPOBHLRPYOHA-KKSZINRNSA-N	6453083
Piperis Longi Fructus(Bibo)	MOL001616	1-[1-oxo-9(3, 4-methylenedioxyphenyl)-2E,8E-nonadienyl] pyrrolidine	49.4254	0.35884	BYKNKNBUHGFXQF-VTBWALSUSA-N	0
Piperis Longi Fructus(Bibo)	MOL001621	l-undecylenyl-3,4-methylenedioxybenzene	47.9733	0.17974	DEHDKPYUMUUMTK-ZHACJKMWSA-N	0
Piperis Longi Fructus(Bibo)	MOL002003	(-)-Caryophyllene oxide	32.6701	0.12925	NVEQFIOZRFFVFW-GUIRCDHDSA-N	0
Amomi Fructus Rotundus (Doukou)	MOL000006	luteolin	36.1626	0.24552	IQPNAANSBPBGFQ-UHFFFAOYSA-N	5280445
Amomi Fructus Rotundus (Doukou)	MOL000019	D-Camphene	34.9792	0.039017	CRPUJAZIXJMDBK-DTWKUNHWSA-N	92221
Amomi Fructus Rotundus (Doukou)	MOL000024	alpha-humulene	22.9768	0.061124	FAMPSKZZVDUYOS-HRGUGZIWSA-N	5281520
Amomi Fructus Rotundus (Doukou)	MOL000086	(24S)-5beta-Stigmastan-3beta-ol	25.3221	0.74704	LGJMUZUPVCAVPU-RMEUMSAISA-N	6451614
Amomi Fructus Rotundus (Doukou)	MOL000098	quercetin	46.4333	0.27525	REFJWTPEDVJJIY-UHFFFAOYSA-N	5280343
Amomi Fructus Rotundus (Doukou)	MOL000105	protocatechuic acid	25.3665	0.035092	YQUVCSBJEUQKSH-UHFFFAOYSA-N	72
Amomi Fructus Rotundus (Doukou)	MOL000118	(L)-alpha-Terpineol	48.7978	0.030772	WUOACPNHFRMFPN-SECBINFHSA-N	443162
Amomi Fructus Rotundus (Doukou)	MOL000122	1,8-cineole	39.7292	0.049041	WEEGYLXZBRQIMU-WAAGHKOSSA-N	2758
Amomi Fructus Rotundus (Doukou)	MOL000125	(-)-alpha-Pinene	46.2498	0.052565	GRWFGVWFFZKLTI-IUCAKERBSA-N	440968
Amomi Fructus Rotundus (Doukou)	MOL000126	(-)-nopinene	44.8353	0.052595	WTARULDDTDQWMU-IUCAKERBSA-N	440967
Amomi Fructus Rotundus (Doukou)	MOL000130	CAM	67.1738	0.053027	DSSYKIVIOFKYAU-XCBNKYQSSA-N	159055
Amomi Fructus Rotundus (Doukou)	MOL000196	L-Bornyl acetate	65.5209	0.075447	KGEKLUUHTZCSIP-HOSYDEDBSA-N	93009
Amomi Fructus Rotundus (Doukou)	MOL000199	Safrol	45.3367	0.047125	ZMQAAUBTXCXRIC-UHFFFAOYSA-N	5144
Amomi Fructus Rotundus (Doukou)	MOL000200	(S)-(+)-alpha-Phellandrene	27.9023	0.022258	OGLDWXZKYODSOB-JTQLQIEISA-N	443160
Amomi Fructus Rotundus (Doukou)	MOL000202	Moslene	33.0164	0.02224	YKFLAYDHMOASIY-UHFFFAOYSA-N	7461
Amomi Fructus Rotundus (Doukou)	MOL000207	Methyleugenol	73.3601	0.042845	ZYEMGPIYFIJGTP-UHFFFAOYSA-N	7127
Amomi Fructus Rotundus (Doukou)	MOL000224	(4E,6E)-1,7-bis(3,4-dihydroxyphenyl)hepta-4,6-dien-3-one	33.0575	0.31386	VJJPCEDEDJXHHK-ZPUQHVIOSA-N	10426520
Amomi Fructus Rotundus (Doukou)	MOL000227	Alnusone	63.119	0.16607	OWMJDOUOHDOUFG-FNCQTZNRSA-N	5317598
Amomi Fructus Rotundus (Doukou)	MOL000228	(2R)-7-hydroxy-5-methoxy-2-phenylchroman-4-one	55.2332	0.20163	QQQCWVDPMPFUGF-CYBMUJFWSA-N	821279
Amomi Fructus Rotundus (Doukou)	MOL000229	cardamomin	68.9604	0.16086	NYSZJNUIVUBQMM-BQYQJAHWSA-N	641785
Amomi Fructus Rotundus (Doukou)	MOL000230	Pinocembrin	57.5625	0.20199	AZTAQMQWFPLFOG-AWEZNQCLSA-N	0
Amomi Fructus Rotundus (Doukou)	MOL000231	trans-1,7-Diphenyl-1hepten-5-ol	46.7337	0.1627	DPRCKWANIKZGTF-HBAHQKBISA-N	0
Amomi Fructus Rotundus (Doukou)	MOL000232	()-alpha-Terpineol	46.2978	0.030811	WUOACPNHFRMFPN-VIFPVBQESA-N	442501
Amomi Fructus Rotundus (Doukou)	MOL000233	delta-Terpineol	55.1099	0.030896	SQIFACVGCPWBQZ-UHFFFAOYSA-N	81722
Amomi Fructus Rotundus (Doukou)	MOL000234	L-Limonen	38.0934	0.022306	XMGQYMWWDOXHJM-SNVBAGLBSA-N	439250
Amomi Fructus Rotundus (Doukou)	MOL000235	1,7-diphenyl-3,5-dihydroxy-1-heptene	49.0129	0.18058	YSRHCYXKOMRFPK-SOEZKFKDSA-N	0
Amomi Fructus Rotundus (Doukou)	MOL000236	1,7-diphenyl-4,6-heptadien-3-one	61.396	0.16601	OWMJDOUOHDOUFG-MFUUIURDSA-N	0
Amomi Fructus Rotundus (Doukou)	MOL000237	Trans-1,7-diphenyl-1-hepten-5-ol	46.7337	0.16251	DPRCKWANIKZGTF-KRSRXSRCSA-N	44560846
Amomi Fructus Rotundus (Doukou)	MOL000238	1,7-diphenyl-5-hydroxy-6-hepten-3-one	32.6498	0.18295	NEQGOKAKPXXESR-IYPOZPNPSA-N	57520989
Amomi Fructus Rotundus (Doukou)	MOL000239	Jaranol	50.8288	0.29148	BJBUTJQYZDYRMJ-UHFFFAOYSA-N	5318869
Amomi Fructus Rotundus (Doukou)	MOL000240	(3R,5S)-1,7-di(phenyl)heptane-3,5-diol	48.3493	0.17942	QSUSPILNZCEGPK-KDURUIRLSA-N	21637670
Amomi Fructus Rotundus (Doukou)	MOL000241	2',4'-dihydroxy-6'-methhoxychalcone	65.5315	0.16059	NYSZJNUIVUBQMM-FPLPWBNLSA-N	0
Amomi Fructus Rotundus (Doukou)	MOL000242	7-O-Methyleriodictyol	56.5614	0.27022	DSAJORLEPQBKDA-AWEZNQCLSA-N	1268276
Amomi Fructus Rotundus (Doukou)	MOL000243	alpinolide peroxide	87.6678	0.18647	HLNVEFWIEKHWOI-GHBALNIRSA-N	0
Amomi Fructus Rotundus (Doukou)	MOL000244	()-Borneol	81.8031	0.052753	DTGKSKDOIYIVQL-WEDXCCLWSA-N	6552009
Amomi Fructus Rotundus (Doukou)	MOL000246	(2R)-5,7-dihydroxy-2-phenylchroman-4-one	46.0766	0.17997	URFCJEUYXNAHFI-CYBMUJFWSA-N	667544
Amomi Fructus Rotundus (Doukou)	MOL000248	(5S)-5-isopropyl-2-methyl-1-cyclohex-2-enone	52.8993	0.029461	WPGPCDVQHXOMQP-VIFPVBQESA-N	6432475
Amomi Fructus Rotundus (Doukou)	MOL000251	Rhamnocitrin	12.8991	0.26607	MQSZRBPYXNEFHF-UHFFFAOYSA-N	5320946
Amomi Fructus Rotundus (Doukou)	MOL000253	Styrene, 3,4-dimethyl-	32.4116	0.023799	PMZXJPLGCUVUDN-UHFFFAOYSA-N	33937
Amomi Fructus Rotundus (Doukou)	MOL000254	eugenol	56.2419	0.036518	RRAFCDWBNXTKKO-UHFFFAOYSA-N	3314
Amomi Fructus Rotundus (Doukou)	MOL000257	(-)-beta-Phellandrene	40.4445	0.022312	LFJQCDVYDGGFCH-SNVBAGLBSA-N	443161
Amomi Fructus Rotundus (Doukou)	MOL000258	dehydrodiisoeugenol	56.8382	0.28531	SGYVGMXKKRURSX-APHBUQMISA-N	0
Amomi Fructus Rotundus (Doukou)	MOL000259	o-Thymol	43.2813	0.029778	RECUKUPTGUEGMW-UHFFFAOYSA-N	10364
Amomi Fructus Rotundus (Doukou)	MOL000260	5-[(2R,3R)-7-methoxy-3-methyl-5-[(E)-prop-1-enyl]-2,3-dihydrobenzofuran-2-yl]-1,3-benzodioxole	65.5526	0.40264	DMMQXURQRMNSBM-YZAYTREXSA-N	6441061
Amomi Fructus Rotundus (Doukou)	MOL000261	Myristicin	17.9854	0.067649	BNWJOHGLIBDBOB-UHFFFAOYSA-N	4276
Amomi Fructus Rotundus (Doukou)	MOL000263	oleanolic acid	29.0208	0.75599	MIJYXULNPSFWEK-GTOFXWBISA-N	10494
Amomi Fructus Rotundus (Doukou)	MOL000264	Tereben	29.6244	0.022251	MOYAFQVGZZPNRA-UHFFFAOYSA-N	11463
Amomi Fructus Rotundus (Doukou)	MOL000266	beta-Cubebene	32.8133	0.10858	FSRZGYRCMPZNJF-KHMAMNHCSA-N	0
Amomi Fructus Rotundus (Doukou)	MOL000268	(1S,5S)-1-isopropyl-4-methylenebicyclo[3.1.0]hexane	46.2051	0.043544	NDVASEGYNIMXJL-UWVGGRQHSA-N	11051711
Amomi Fructus Rotundus (Doukou)	MOL000269	Elemicin	21.9407	0.060865	BPLQKQKXWHCZSS-UHFFFAOYSA-N	10248
Amomi Fructus Rotundus (Doukou)	MOL000270	CHEBI:7	45.1981	0.04265	BQOFWKZOCNGFEC-BDAKNGLRSA-N	443156
Amomi Fructus Rotundus (Doukou)	MOL000271	l-carvone	49.4698	0.02998	ULDHMXUKGWMISQ-SECBINFHSA-N	439570
Cinnamomi Cortex (Rougui)	MOL000019	D-Camphene	34.9792	0.039017	CRPUJAZIXJMDBK-DTWKUNHWSA-N	92221
Cinnamomi Cortex (Rougui)	MOL000024	alpha-humulene	22.9768	0.061124	FAMPSKZZVDUYOS-HRGUGZIWSA-N	5281520
Cinnamomi Cortex (Rougui)	MOL000035	beta-Selinene	24.3882	0.081081	YOVSPTNQHMDJAG-QLFBSQMISA-N	442393
Cinnamomi Cortex (Rougui)	MOL000057	DIBP	49.6341	0.13067	MGWAVDBGNNKXQV-UHFFFAOYSA-N	6782
Cinnamomi Cortex (Rougui)	MOL000118	(L)-alpha-Terpineol	48.7978	0.030772	WUOACPNHFRMFPN-SECBINFHSA-N	443162
Cinnamomi Cortex (Rougui)	MOL000122	1,8-cineole	39.7292	0.049041	WEEGYLXZBRQIMU-WAAGHKOSSA-N	2758
Cinnamomi Cortex (Rougui)	MOL000125	(-)-alpha-Pinene	46.2498	0.052565	GRWFGVWFFZKLTI-IUCAKERBSA-N	440968
Cinnamomi Cortex (Rougui)	MOL000126	(-)-nopinene	44.8353	0.052595	WTARULDDTDQWMU-IUCAKERBSA-N	440967
Cinnamomi Cortex (Rougui)	MOL000130	CAM	67.1738	0.053027	DSSYKIVIOFKYAU-XCBNKYQSSA-N	159055
Cinnamomi Cortex (Rougui)	MOL000131	EIC	41.9044	0.14347	OYHQOLUKZRVURQ-HZJYTTRNSA-N	5280450
Cinnamomi Cortex (Rougui)	MOL000202	Moslene	33.0164	0.02224	YKFLAYDHMOASIY-UHFFFAOYSA-N	7461
Cinnamomi Cortex (Rougui)	MOL000208	()-Aromadendrene	55.7417	0.10418	ITYNGVSTWVVPIC-XVIXHAIJSA-N	11095734
Cinnamomi Cortex (Rougui)	MOL000219	BOX	31.5464	0.020166	WPYMKLBDIGXBTP-UHFFFAOYSA-N	20144841
Cinnamomi Cortex (Rougui)	MOL000234	L-Limonen	38.0934	0.022306	XMGQYMWWDOXHJM-SNVBAGLBSA-N	439250
Cinnamomi Cortex (Rougui)	MOL000254	eugenol	56.2419	0.036518	RRAFCDWBNXTKKO-UHFFFAOYSA-N	3314
Cinnamomi Cortex (Rougui)	MOL000266	beta-Cubebene	32.8133	0.10858	FSRZGYRCMPZNJF-KHMAMNHCSA-N	0
Cinnamomi Cortex (Rougui)	MOL000431	coumarin	29.1676	0.043014	ZYGHJZDHTFUPRJ-UHFFFAOYSA-N	323
Cinnamomi Cortex (Rougui)	MOL000475	anethole	32.4923	0.02782	RUVINXPYWBROJD-ONEGZZNKSA-N	637563
Cinnamomi Cortex (Rougui)	MOL000489	(1S,4aR,8aR)-1-isopropyl-7-methyl-4-methylene-2,3,4a,5,6,8a-hexahydro-1H-naphthalene	19.8025	0.077344	WRHGORWNJGOVQY-KKUMJFAQSA-N	6432404
Cinnamomi Cortex (Rougui)	MOL000608	()-Terpinen-4-ol	81.4067	0.032323	WRYLYDPHFGVWKC-SNVBAGLBSA-N	2724161
Cinnamomi Cortex (Rougui)	MOL000612	(-)-alpha-cedrene	55.561	0.10498	IRAQOCYXUMOFCW-OSFYFWSMSA-N	0
Cinnamomi Cortex (Rougui)	MOL000615	delta-amorphene	17.9461	0.077173	FUCYIEXQVQJBKY-ZFWWWQNUSA-N	441005
Cinnamomi Cortex (Rougui)	MOL000675	oleic acid	33.1284	0.14243	ZQPPMHVWECSIRJ-KTKRTIGZSA-N	445639
Cinnamomi Cortex (Rougui)	MOL000677	(1R,4R)-4-isopropyl-1,6-dimethyltetralin	17.4683	0.077611	PGTJIOWQJWHTJJ-CHWSQXEVSA-N	11298625
Cinnamomi Cortex (Rougui)	MOL000698	(R)-(-)-alpha-Phellandrene	27.5068	0.022258	OGLDWXZKYODSOB-SNVBAGLBSA-N	442482
Cinnamomi Cortex (Rougui)	MOL000699	m-Cymol	48.8517	0.022564	XCYJPXQACVEIOS-UHFFFAOYSA-N	10812
Cinnamomi Cortex (Rougui)	MOL000911	Terpilene	33.9508	0.022228	YHQGMYUVUMAZJR-UHFFFAOYSA-N	7462
Cinnamomi Cortex (Rougui)	MOL000991	cinnamaldehyde	31.9904	0.02266	KJPRLNWUNMBNBZ-QPJJXVBHSA-N	637511
Cinnamomi Cortex (Rougui)	MOL001123	muurolene	19.4975	0.077245	QMAYBMKBYCGXDH-ZNMIVQPWSA-N	12306047
Cinnamomi Cortex (Rougui)	MOL001201	(1R,5R,7S)-4,7-dimethyl-7-(4-methylpent-3-enyl)bicyclo[3.1.1]hept-3-ene	16.2256	0.090114	YMBFCQPIMVLNIU-KFWWJZLASA-N	13889654
Cinnamomi Cortex (Rougui)	MOL001237	o-Acetyltoluene	38.961	0.024841	YXWWHNCQZBVZPV-UHFFFAOYSA-N	11340
Cinnamomi Cortex (Rougui)	MOL001300	PEL	44.0342	0.017357	WRMNZCZEMHIOCP-UHFFFAOYSA-N	6054
Cinnamomi Cortex (Rougui)	MOL001578	Hypnon	48.1926	0.018645	KWOLFJPFCHCOCG-UHFFFAOYSA-N	7410
Cinnamomi Cortex (Rougui)	MOL001862	Cadalin	12.9631	0.078803	VMOJIHDTVZTGDO-UHFFFAOYSA-N	10225
Cinnamomi Cortex (Rougui)	MOL002003	(-)-Caryophyllene oxide	32.6701	0.12925	NVEQFIOZRFFVFW-GUIRCDHDSA-N	0
Cinnamomi Cortex (Rougui)	MOL002225	Styrone	38.3522	0.022038	OOCCDEMITAIZTP-QPJJXVBHSA-N	5315892
Cinnamomi Cortex (Rougui)	MOL002295	cinnamic acid	19.6825	0.029479	WBYWAXJHAXSJNI-VOTSOKGWSA-N	444539
Cinnamomi Cortex (Rougui)	MOL002458	ZINC01850974	78.8588	0.050454	IAIHUHQCLTYTSF-QXFUBDJGSA-N	6973643
Cinnamomi Cortex (Rougui)	MOL002526	3691-11-0	23.6559	0.072163	YHAJBLWYOIUHHM-GUTXKFCHSA-N	94275
Cinnamomi Cortex (Rougui)	MOL002697	junipene	44.0737	0.10826	PDSNLYSELAIEBU-ABHRYQDASA-N	0
Cinnamomi Cortex (Rougui)	MOL002841	l-alpha-Fenchone	72.639	0.050709	LHXDLQBQYFFVNW-OIBJUYFYSA-N	82229
Cinnamomi Cortex (Rougui)	MOL002972	(4S)-1-methyl-4-(6-methylhepta-1,5-dien-2-yl)cyclohexene	20.3016	0.055521	XZRVRYFILCSYSP-OAHLLOKOSA-N	10104370
Cinnamomi Cortex (Rougui)	MOL003032	BZM	18.6385	0.085753	SESFRYSPDFLNCH-UHFFFAOYSA-N	2345
Cinnamomi Cortex (Rougui)	MOL003047	[(1S)-endo]-(-)-Borneol	83.5449	0.05275	DTGKSKDOIYIVQL-QXFUBDJGSA-N	1201518
Cinnamomi Cortex (Rougui)	MOL003521	Isohomogenol	32.6114	0.042661	NNWHUJCUHAELCL-SNAWJCMRSA-N	637776
Cinnamomi Cortex (Rougui)	MOL003522	()-Sativene	37.4136	0.10495	VOBBUADSYROGAT-VYDRJRHOSA-N	0
Cinnamomi Cortex (Rougui)	MOL003524	Benzenepropanol	36.5721	0.021644	VAJVDSVGBWFCLW-UHFFFAOYSA-N	31234
Cinnamomi Cortex (Rougui)	MOL003525	Pyruvophenone	35.9335	0.030245	BVQVLAIMHVDZEL-UHFFFAOYSA-N	11363
Cinnamomi Cortex (Rougui)	MOL003528	METHYLBENZOFURAN	54.3526	0.032204	GBGPVUAOTCNZPT-UHFFFAOYSA-N	20263
Cinnamomi Cortex (Rougui)	MOL003529	m-Methylacetophenone	40.6256	0.023942	FSPSELPMWGWDRY-UHFFFAOYSA-N	11455
Cinnamomi Cortex (Rougui)	MOL003531	3-methoxycinnamaldehyde	54.6512	0.036522	XHYAQFCRAQUBTD-HYXAFXHYSA-N	20979959
Cinnamomi Cortex (Rougui)	MOL003534	CADINENE	17.1183	0.077374	USDOQCCMRDNVAH-KKUMJFAQSA-N	10657
Cinnamomi Cortex (Rougui)	MOL003536	T-Cadinol	28.595	0.093146	LHYHMMRYTDARSZ-XQLPTFJDSA-N	160799
Cinnamomi Cortex (Rougui)	MOL003537	T-Muurolol	30.4145	0.093121	LHYHMMRYTDARSZ-AJNGGQMLSA-N	3084331
Cinnamomi Cortex (Rougui)	MOL003538	()-Ledene	51.8442	0.10403	WGTRJVCFDUCKCM-FMKGYKFTSA-N	10910653
