# Supplementary material for: The Potential Mechanism of Wuwei Qingzhuo San against Hyperlipidemia Based on TCM Network Pharmacology and Validation Experiments in Hyperlipidemia Hamster
Source: Evid Based Complement Alternat Med. 2020 May 10;2020:5369025. doi: 10.1155/2020/5369025 (PMC7212318; doi:10.1155/2020/5369025)
Supplement: Supplementary Materials — include the following. Supplementary Table 1: information of compounds from five herbal medicines in WWQZS collected from public data resources and Information of candidate compounds of five herbal medicines in WWQZS after screening. Supplementary Table 2: the details of targets from compounds in Shiliu, Honghua, Bibo, Doukou, and Rougui. Supplementary Table 3: known hyperlipidemia-related targets. WWQZS shared 43 potential targets with known anti-hyperlipidemia targets. Supplementary Table 4: the degrees and betweennesses of nodes in 45 candidate targets network. Supplementary Table 5: the BP, MF, and CC enrichment analyses for targets of WWQZS against hyperlipidemia. Supplementary Table 6: the KEGG pathways enrichment analysis for targets of WWQZS against hyperlipidemia. [file 5369025.f1.zip › 5369025.f1/supplement table 2.xlsx]

## Sheet: Shiliu
The details of targets from compounds in Shiliu
Molecule ID	Molecule Name	Target ID	Target Protein Name	Gene Symbol	Uniprot ID
MOL000006	luteolin	TAR00003	Nitric oxide synthase, inducible	NOS2	P35228
		TAR00006	Prostaglandin G/H synthase 1	PTGS1	P23219
		TAR00011	Insulin receptor	INSR	P06213
		TAR00046	Estrogen receptor	ESR1	P03372
		TAR00048	Androgen receptor	AR	P10275
		TAR00078	Peroxisome proliferator-activated receptor gamma	PPARG	P37231
		TAR00094	Prostaglandin G/H synthase 2	PTGS2	P35354
		TAR00117	Carbonic anhydrase 2	CA2	P00918
		TAR00229	Tyrosine-protein phosphatase non-receptor type 1	PTPN1	P18031
		TAR00238	72 kDa type IV collagenase	MMP2	P08253
		TAR00265	Tumor necrosis factor	TNF	P01375
		TAR00298	Epidermal growth factor receptor	EGFR	P00533
		TAR00307	Estrogen receptor beta	ESR2	Q92731
		TAR00332	Dipeptidyl peptidase 4	DPP4	P27487
		TAR00349	Hepatocyte growth factor receptor	MET	P08581
		TAR00351	Interleukin-6	IL6	P05231
		TAR00353	Interstitial collagenase	MMP1	P03956
		TAR00354	Mitogen-activated protein kinase 1	MAPK1	P28482
		TAR00365	Interferon gamma	IFNG	P01579
		TAR00402	Mitogen-activated protein kinase 14	MAPK14	Q16539
		TAR00414	Transcription factor AP-1	JUN	P05412
		TAR00422	Glycogen synthase kinase-3 beta	GSK3B	P49841
		TAR00482	Cyclin-dependent kinase 2	CDK2	P24941
		TAR00491	Phosphatidylinositol 4,5-bisphosphate 3-kinase catalytic subunit gamma isoform	PIK3CG	P48736
		TAR00568	Xanthine dehydrogenase/oxidase [Includes: Xanthine dehydrogenase	XDH	P47989
		TAR00573	Cyclin-dependent kinase 4	CDK4	P11802
		TAR00646	Cellular tumor antigen p53	TP53	P04637
		TAR00648	Amyloid-beta A4 protein	APP	P05067
		TAR00699	cAMP-dependent protein kinase catalytic subunit alpha	PRKACA	P17612
		TAR00733	Glutathione S-transferase P	GSTP1	P09211
		TAR00740	Vascular endothelial growth factor A	VEGFA	P15692
		TAR01293	DNA topoisomerase 1	TOP1	P11387
		TAR02132	Heme oxygenase 1	HMOX1	P09601
		TAR02915	Retinoblastoma-associated protein	RB1	P06400
		TAR02928	Trypsin-1	PRSS1	P07477
		TAR02966	Serine/threonine-protein kinase pim-1	PIM1	P11309
		TAR03025	Cyclin-A2	CCNA2	P20248
		TAR03276	Nuclear receptor coactivator 2	NCOA2	Q15596
		TAR03575	Caspase-7	CASP7	P55210
		TAR03978	Interleukin-2	IL2	P60568
MOL000098	quercetin	TAR00003	Nitric oxide synthase, inducible	NOS2	P35228
		TAR00006	Prostaglandin G/H synthase 1	PTGS1	P23219
		TAR00011	Insulin receptor	INSR	P06213
		TAR00017	Prothrombin	F2	P00734
		TAR00037	Potassium voltage-gated channel subfamily H member 2	KCNH2	Q12809
		TAR00046	Estrogen receptor	ESR1	P03372
		TAR00048	Androgen receptor	AR	P10275
		TAR00070	Sodium channel protein type 5 subunit alpha	SCN5A	Q14524
		TAR00078	Peroxisome proliferator-activated receptor gamma	PPARG	P37231
		TAR00079	Coagulation factor X	F10	P00742
		TAR00086	Apoptosis regulator Bcl-2	BCL2	P10415
		TAR00088	Arachidonate 5-lipoxygenase	ALOX5	P09917
		TAR00094	Prostaglandin G/H synthase 2	PTGS2	P35354
		TAR00095	Nitric oxide synthase, endothelial	NOS3	P29474
		TAR00117	Carbonic anhydrase 2	CA2	P00918
		TAR00123	Coagulation factor VII	F7	P08709
		TAR00153	Ornithine decarboxylase	ODC1	P11926
		TAR00158	Retinoic acid receptor RXR-alpha	RXRA	P19793
		TAR00165	Acetylcholinesterase	ACHE	P22303
		TAR00229	Tyrosine-protein phosphatase non-receptor type 1	PTPN1	P18031
		TAR00231	Acetyl-CoA carboxylase 1	ACACA	Q13085
		TAR00238	72 kDa type IV collagenase	MMP2	P08253
		TAR00261	Beta-2 adrenergic receptor	ADRB2	P07550
		TAR00265	Tumor necrosis factor	TNF	P01375
		TAR00288	Aldose reductase	AKR1B1	P15121
		TAR00298	Epidermal growth factor receptor	EGFR	P00533
		TAR00307	Estrogen receptor beta	ESR2	Q92731
		TAR00309	Gamma-aminobutyric acid receptor subunit alpha-1	GABRA1	P14867
		TAR00318	Maltase-glucoamylase, intestinal [Includes: Maltase	MGAM	O43451
		TAR00332	Dipeptidyl peptidase 4	DPP4	P27487
		TAR00346	Urokinase-type plasminogen activator	PLAU	P00749
		TAR00351	Interleukin-6	IL6	P05231
		TAR00353	Interstitial collagenase	MMP1	P03956
		TAR00354	Mitogen-activated protein kinase 1	MAPK1	P28482
		TAR00357	Serum paraoxonase/arylesterase 1	PON1	P27169
		TAR00363	Cathepsin D	CTSD	P07339
		TAR00365	Interferon gamma	IFNG	P01579
		TAR00402	Mitogen-activated protein kinase 14	MAPK14	Q16539
		TAR00414	Transcription factor AP-1	JUN	P05412
		TAR00417	C-C motif chemokine 2	CCL2	P13500
		TAR00418	Interleukin-1 beta	IL1B	P01584
		TAR00422	Glycogen synthase kinase-3 beta	GSK3B	P49841
		TAR00427	E-selectin	SELE	P16581
		TAR00428	Myeloperoxidase	MPO	P05164
		TAR00431	Cyclin-dependent kinase 1	CDK1	P06493
		TAR00434	Tissue-type plasminogen activator	PLAT	P00750
		TAR00436	Gap junction alpha-1 protein	GJA1	P17302
		TAR00440	Vascular cell adhesion protein 1	VCAM1	P19320
		TAR00441	Stromelysin-1	MMP3	P08254
		TAR00457	Thrombomodulin	THBD	P07204
		TAR00466	Tissue factor	F3	P13726
		TAR00470	NAD	NQO1	P15559
		TAR00482	Cyclin-dependent kinase 2	CDK2	P24941
		TAR00491	Phosphatidylinositol 4,5-bisphosphate 3-kinase catalytic subunit gamma isoform	PIK3CG	P48736
		TAR00499	Endoribonuclease LACTB2	LACTB2	Q53H82
		TAR00565	Amine oxidase [flavin-containing] B	MAOB	P27338
		TAR00568	Xanthine dehydrogenase/oxidase [Includes: Xanthine dehydrogenase	XDH	P47989
		TAR00593	Prostaglandin E2 receptor EP3 subtype	PTGER3	P43115
		TAR00597	Superoxide dismutase [Cu-Zn]	SOD1	P00441
		TAR00621	Cytochrome P450 3A4	CYP3A4	P08684
		TAR00646	Cellular tumor antigen p53	TP53	P04637
		TAR00647	Serine/threonine-protein kinase Chk1	CHEK1	O14757
		TAR00699	cAMP-dependent protein kinase catalytic subunit alpha	PRKACA	P17612
		TAR00724	Cytochrome P450 1A2	CYP1A2	P05177
		TAR00731	Collagen alpha-1	COL1A1	P02452
		TAR00733	Glutathione S-transferase P	GSTP1	P09211
		TAR00734	Pro-epidermal growth factor	EGF	P01133
		TAR00740	Vascular endothelial growth factor A	VEGFA	P15692
		TAR00744	NADPH--cytochrome P450 reductase	POR	P16435
		TAR00781	Estrogen sulfotransferase	SULT1E1	P49888
		TAR01293	DNA topoisomerase 1	TOP1	P11387
		TAR02132	Heme oxygenase 1	HMOX1	P09601
		TAR02885	Collagen alpha-1	COL3A1	P02461
		TAR02915	Retinoblastoma-associated protein	RB1	P06400
		TAR02928	Trypsin-1	PRSS1	P07477
		TAR02952	Glutathione S-transferase Mu 1	GSTM1	P09488
		TAR02963	Endoplasmic reticulum chaperone BiP	HSPA5	P11021
		TAR02966	Serine/threonine-protein kinase pim-1	PIM1	P11309
		TAR02998	Prostatic acid phosphatase	ACPP	P15309
		TAR03025	Cyclin-A2	CCNA2	P20248
		TAR03204	Aryl hydrocarbon receptor	AHR	P35869
		TAR03276	Nuclear receptor coactivator 2	NCOA2	Q15596
		TAR03688	Glutathione S-transferase Mu 2	GSTM2	P28161
		TAR03978	Interleukin-2	IL2	P60568
MOL000105	protocatechuic acid	TAR00006	Prostaglandin G/H synthase 1	PTGS1	P23219
		TAR00017	Prothrombin	F2	P00734
		TAR00088	Arachidonate 5-lipoxygenase	ALOX5	P09917
		TAR00094	Prostaglandin G/H synthase 2	PTGS2	P35354
		TAR00117	Carbonic anhydrase 2	CA2	P00918
		TAR00165	Acetylcholinesterase	ACHE	P22303
		TAR00318	Maltase-glucoamylase, intestinal [Includes: Maltase	MGAM	O43451
		TAR00482	Cyclin-dependent kinase 2	CDK2	P24941
		TAR00499	Endoribonuclease LACTB2	LACTB2	Q53H82
		TAR00565	Amine oxidase [flavin-containing] B	MAOB	P27338
		TAR00727	Alcohol dehydrogenase 1C	ADH1C	P00326
		TAR01172	Lysozyme C	LYZ	P61626
		TAR02928	Trypsin-1	PRSS1	P07477
		TAR03952	Trypsin-3	PRSS3	P35030
MOL000131	EIC	TAR00003	Nitric oxide synthase, inducible	NOS2	P35228
		TAR00006	Prostaglandin G/H synthase 1	PTGS1	P23219
		TAR00017	Prothrombin	F2	P00734
		TAR00038	Muscarinic acetylcholine receptor M1	CHRM1	P11229
		TAR00046	Estrogen receptor	ESR1	P03372
		TAR00078	Peroxisome proliferator-activated receptor gamma	PPARG	P37231
		TAR00094	Prostaglandin G/H synthase 2	PTGS2	P35354
		TAR00095	Nitric oxide synthase, endothelial	NOS3	P29474
		TAR00117	Carbonic anhydrase 2	CA2	P00918
		TAR00141	Gamma-aminobutyric acid receptor subunit alpha-2	GABRA2	P47869
		TAR00158	Retinoic acid receptor RXR-alpha	RXRA	P19793
		TAR00165	Acetylcholinesterase	ACHE	P22303
		TAR00186	Sodium-dependent noradrenaline transporter	SLC6A2	P23975
		TAR00210	Muscarinic acetylcholine receptor M2	CHRM2	P08172
		TAR00309	Gamma-aminobutyric acid receptor subunit alpha-1	GABRA1	P14867
		TAR00332	Dipeptidyl peptidase 4	DPP4	P27487
		TAR00404	Transient receptor potential cation channel subfamily V member 1	TRPV1	Q8NER1
		TAR01172	Lysozyme C	LYZ	P61626
		TAR01201	Immunoglobulin heavy constant gamma 1	IGHG1	P01857
		TAR02928	Trypsin-1	PRSS1	P07477
		TAR03276	Nuclear receptor coactivator 2	NCOA2	Q15596
		TAR03284	Gamma-aminobutyric acid receptor subunit alpha-6	GABRA6	Q16445
MOL000263	oleanolic acid	TAR00046	Estrogen receptor	ESR1	P03372
		TAR00048	Androgen receptor	AR	P10275
		TAR00308	Glucocorticoid receptor	NR3C1	P04150
		TAR00470	NAD	NQO1	P15559
		TAR00622	Pancreatic alpha-amylase	AMY2A	P04746
		TAR02132	Heme oxygenase 1	HMOX1	P09601
MOL000358	beta-sitosterol	TAR00003	Nitric oxide synthase, inducible	NOS2	P35228
		TAR00006	Prostaglandin G/H synthase 1	PTGS1	P23219
		TAR00007	D	DRD1	P21728
		TAR00016	Muscarinic acetylcholine receptor M3	CHRM3	P20309
		TAR00017	Prothrombin	F2	P00734
		TAR00037	Potassium voltage-gated channel subfamily H member 2	KCNH2	Q12809
		TAR00038	Muscarinic acetylcholine receptor M1	CHRM1	P11229
		TAR00046	Estrogen receptor	ESR1	P03372
		TAR00048	Androgen receptor	AR	P10275
		TAR00070	Sodium channel protein type 5 subunit alpha	SCN5A	Q14524
		TAR00078	Peroxisome proliferator-activated receptor gamma	PPARG	P37231
		TAR00086	Apoptosis regulator Bcl-2	BCL2	P10415
		TAR00094	Prostaglandin G/H synthase 2	PTGS2	P35354
		TAR00117	Carbonic anhydrase 2	CA2	P00918
		TAR00141	Gamma-aminobutyric acid receptor subunit alpha-2	GABRA2	P47869
		TAR00154	Muscarinic acetylcholine receptor M4	CHRM4	P08173
		TAR00165	Acetylcholinesterase	ACHE	P22303
		TAR00172	cGMP-inhibited 3',5'-cyclic phosphodiesterase A	PDE3A	Q14432
		TAR00175	5-hydroxytryptamine receptor 2A	HTR2A	P28223
		TAR00181	Gamma-aminobutyric acid receptor subunit alpha-5	GABRA5	P31644
		TAR00191	Alpha-1A adrenergic receptor	ADRA1A	P35348
		TAR00200	Gamma-aminobutyric acid receptor subunit alpha-3	GABRA3	P34903
		TAR00209	Progesterone receptor	PGR	P06401
		TAR00210	Muscarinic acetylcholine receptor M2	CHRM2	P08172
		TAR00216	Alpha-1B adrenergic receptor	ADRA1B	P35368
		TAR00229	Tyrosine-protein phosphatase non-receptor type 1	PTPN1	P18031
		TAR00261	Beta-2 adrenergic receptor	ADRB2	P07550
		TAR00284	Neuronal acetylcholine receptor subunit alpha-2	CHRNA2	Q15822
		TAR00290	Sodium-dependent serotonin transporter	SLC6A4	P31645
		TAR00299	Mu-type opioid receptor	OPRM1	P35372
		TAR00307	Estrogen receptor beta	ESR2	Q92731
		TAR00308	Glucocorticoid receptor	NR3C1	P04150
		TAR00309	Gamma-aminobutyric acid receptor subunit alpha-1	GABRA1	P14867
		TAR00332	Dipeptidyl peptidase 4	DPP4	P27487
		TAR00357	Serum paraoxonase/arylesterase 1	PON1	P27169
		TAR00402	Mitogen-activated protein kinase 14	MAPK14	Q16539
		TAR00414	Transcription factor AP-1	JUN	P05412
		TAR00422	Glycogen synthase kinase-3 beta	GSK3B	P49841
		TAR00482	Cyclin-dependent kinase 2	CDK2	P24941
		TAR00491	Phosphatidylinositol 4,5-bisphosphate 3-kinase catalytic subunit gamma isoform	PIK3CG	P48736
		TAR00499	Endoribonuclease LACTB2	LACTB2	Q53H82
		TAR00581	Neuronal acetylcholine receptor subunit alpha-7	CHRNA7	P36544
		TAR00647	Serine/threonine-protein kinase Chk1	CHEK1	O14757
		TAR00699	cAMP-dependent protein kinase catalytic subunit alpha	PRKACA	P17612
		TAR02928	Trypsin-1	PRSS1	P07477
		TAR02966	Serine/threonine-protein kinase pim-1	PIM1	P11309
		TAR03025	Cyclin-A2	CCNA2	P20248
		TAR03276	Nuclear receptor coactivator 2	NCOA2	Q15596
		TAR03987	Mitogen-activated protein kinase 3	MAPK3	P27361
MOL000414	Caffeate	TAR00003	Nitric oxide synthase, inducible	NOS2	P35228
		TAR00006	Prostaglandin G/H synthase 1	PTGS1	P23219
		TAR00017	Prothrombin	F2	P00734
		TAR00063	Beta-1 adrenergic receptor	ADRB1	P08588
		TAR00094	Prostaglandin G/H synthase 2	PTGS2	P35354
		TAR00095	Nitric oxide synthase, endothelial	NOS3	P29474
		TAR00105	Alpha-2A adrenergic receptor	ADRA2A	P08913
		TAR00117	Carbonic anhydrase 2	CA2	P00918
		TAR00126	Alpha-2C adrenergic receptor	ADRA2C	P18825
		TAR00165	Acetylcholinesterase	ACHE	P22303
		TAR00261	Beta-2 adrenergic receptor	ADRB2	P07550
		TAR00332	Dipeptidyl peptidase 4	DPP4	P27487
		TAR00482	Cyclin-dependent kinase 2	CDK2	P24941
		TAR00499	Endoribonuclease LACTB2	LACTB2	Q53H82
		TAR00565	Amine oxidase [flavin-containing] B	MAOB	P27338
		TAR00566	Amine oxidase [flavin-containing] A	MAOA	P21397
		TAR01696	Chymotrypsinogen B	CTRB1	P17538
		TAR02928	Trypsin-1	PRSS1	P07477
MOL000415	rutin	TAR00003	Nitric oxide synthase, inducible	NOS2	P35228
		TAR00088	Arachidonate 5-lipoxygenase	ALOX5	P09917
		TAR00265	Tumor necrosis factor	TNF	P01375
		TAR00294	Thromboxane A2 receptor	TBXA2R	P21731
		TAR00351	Interleukin-6	IL6	P05231
		TAR00415	Integrin beta-2	ITGB2	P05107
		TAR00418	Interleukin-1 beta	IL1B	P01584
		TAR00597	Superoxide dismutase [Cu-Zn]	SOD1	P00441
		TAR00733	Glutathione S-transferase P	GSTP1	P09211
		TAR00735	Catalase	CAT	P04040
		TAR00744	NADPH--cytochrome P450 reductase	POR	P16435
		TAR01644	3-hydroxy-3-methylglutaryl-coenzyme A reductase	HMGCR	P04035
		TAR02882	Insulin [Cleaved into: Insulin B chain; Insulin A chain]	INS	P01308
MOL000422	kaempferol	TAR00003	Nitric oxide synthase, inducible	NOS2	P35228
		TAR00006	Prostaglandin G/H synthase 1	PTGS1	P23219
		TAR00011	Insulin receptor	INSR	P06213
		TAR00017	Prothrombin	F2	P00734
		TAR00038	Muscarinic acetylcholine receptor M1	CHRM1	P11229
		TAR00046	Estrogen receptor	ESR1	P03372
		TAR00048	Androgen receptor	AR	P10275
		TAR00078	Peroxisome proliferator-activated receptor gamma	PPARG	P37231
		TAR00086	Apoptosis regulator Bcl-2	BCL2	P10415
		TAR00088	Arachidonate 5-lipoxygenase	ALOX5	P09917
		TAR00094	Prostaglandin G/H synthase 2	PTGS2	P35354
		TAR00095	Nitric oxide synthase, endothelial	NOS3	P29474
		TAR00117	Carbonic anhydrase 2	CA2	P00918
		TAR00123	Coagulation factor VII	F7	P08709
		TAR00141	Gamma-aminobutyric acid receptor subunit alpha-2	GABRA2	P47869
		TAR00165	Acetylcholinesterase	ACHE	P22303
		TAR00186	Sodium-dependent noradrenaline transporter	SLC6A2	P23975
		TAR00209	Progesterone receptor	PGR	P06401
		TAR00210	Muscarinic acetylcholine receptor M2	CHRM2	P08172
		TAR00216	Alpha-1B adrenergic receptor	ADRA1B	P35368
		TAR00222	Aldo-keto reductase family 1 member C3	AKR1C3	P42330
		TAR00229	Tyrosine-protein phosphatase non-receptor type 1	PTPN1	P18031
		TAR00265	Tumor necrosis factor	TNF	P01375
		TAR00307	Estrogen receptor beta	ESR2	Q92731
		TAR00309	Gamma-aminobutyric acid receptor subunit alpha-1	GABRA1	P14867
		TAR00332	Dipeptidyl peptidase 4	DPP4	P27487
		TAR00353	Interstitial collagenase	MMP1	P03956
		TAR00402	Mitogen-activated protein kinase 14	MAPK14	Q16539
		TAR00414	Transcription factor AP-1	JUN	P05412
		TAR00422	Glycogen synthase kinase-3 beta	GSK3B	P49841
		TAR00427	E-selectin	SELE	P16581
		TAR00431	Cyclin-dependent kinase 1	CDK1	P06493
		TAR00440	Vascular cell adhesion protein 1	VCAM1	P19320
		TAR00482	Cyclin-dependent kinase 2	CDK2	P24941
		TAR00491	Phosphatidylinositol 4,5-bisphosphate 3-kinase catalytic subunit gamma isoform	PIK3CG	P48736
		TAR00499	Endoribonuclease LACTB2	LACTB2	Q53H82
		TAR00568	Xanthine dehydrogenase/oxidase [Includes: Xanthine dehydrogenase	XDH	P47989
		TAR00621	Cytochrome P450 3A4	CYP3A4	P08684
		TAR00647	Serine/threonine-protein kinase Chk1	CHEK1	O14757
		TAR00699	cAMP-dependent protein kinase catalytic subunit alpha	PRKACA	P17612
		TAR00704	Mitogen-activated protein kinase 8	MAPK8	P45983
		TAR00724	Cytochrome P450 1A2	CYP1A2	P05177
		TAR00733	Glutathione S-transferase P	GSTP1	P09211
		TAR02132	Heme oxygenase 1	HMOX1	P09601
		TAR02928	Trypsin-1	PRSS1	P07477
		TAR02952	Glutathione S-transferase Mu 1	GSTM1	P09488
		TAR02966	Serine/threonine-protein kinase pim-1	PIM1	P11309
		TAR03025	Cyclin-A2	CCNA2	P20248
		TAR03204	Aryl hydrocarbon receptor	AHR	P35869
		TAR03276	Nuclear receptor coactivator 2	NCOA2	Q15596
		TAR03688	Glutathione S-transferase Mu 2	GSTM2	P28161
		TAR03971	Serine/threonine-protein phosphatase 2B catalytic subunit alpha isoform	PPP3CA	Q08209
MOL000432	linolenic acid	TAR00003	Nitric oxide synthase, inducible	NOS2	P35228
		TAR00006	Prostaglandin G/H synthase 1	PTGS1	P23219
		TAR00017	Prothrombin	F2	P00734
		TAR00046	Estrogen receptor	ESR1	P03372
		TAR00078	Peroxisome proliferator-activated receptor gamma	PPARG	P37231
		TAR00094	Prostaglandin G/H synthase 2	PTGS2	P35354
		TAR00095	Nitric oxide synthase, endothelial	NOS3	P29474
		TAR00117	Carbonic anhydrase 2	CA2	P00918
		TAR00158	Retinoic acid receptor RXR-alpha	RXRA	P19793
		TAR00165	Acetylcholinesterase	ACHE	P22303
		TAR00267	Retinoic acid receptor RXR-gamma	RXRG	P48443
		TAR00332	Dipeptidyl peptidase 4	DPP4	P27487
		TAR00404	Transient receptor potential cation channel subfamily V member 1	TRPV1	Q8NER1
		TAR00710	Hepatocyte nuclear factor 4-alpha	HNF4A	P41235
		TAR03276	Nuclear receptor coactivator 2	NCOA2	Q15596
MOL000437	Hirsutrin	TAR00079	Coagulation factor X	F10	P00742
		TAR00117	Carbonic anhydrase 2	CA2	P00918
		TAR00229	Tyrosine-protein phosphatase non-receptor type 1	PTPN1	P18031
		TAR02966	Serine/threonine-protein kinase pim-1	PIM1	P11309
MOL000492	(+)-catechin	TAR00003	Nitric oxide synthase, inducible	NOS2	P35228
		TAR00006	Prostaglandin G/H synthase 1	PTGS1	P23219
		TAR00046	Estrogen receptor	ESR1	P03372
		TAR00048	Androgen receptor	AR	P10275
		TAR00078	Peroxisome proliferator-activated receptor gamma	PPARG	P37231
		TAR00094	Prostaglandin G/H synthase 2	PTGS2	P35354
		TAR00117	Carbonic anhydrase 2	CA2	P00918
		TAR00158	Retinoic acid receptor RXR-alpha	RXRA	P19793
		TAR00229	Tyrosine-protein phosphatase non-receptor type 1	PTPN1	P18031
		TAR00307	Estrogen receptor beta	ESR2	Q92731
		TAR00332	Dipeptidyl peptidase 4	DPP4	P27487
		TAR00402	Mitogen-activated protein kinase 14	MAPK14	Q16539
		TAR00422	Glycogen synthase kinase-3 beta	GSK3B	P49841
		TAR00482	Cyclin-dependent kinase 2	CDK2	P24941
		TAR00499	Endoribonuclease LACTB2	LACTB2	Q53H82
		TAR00647	Serine/threonine-protein kinase Chk1	CHEK1	O14757
		TAR00699	cAMP-dependent protein kinase catalytic subunit alpha	PRKACA	P17612
		TAR00735	Catalase	CAT	P04040
		TAR02966	Serine/threonine-protein kinase pim-1	PIM1	P11309
		TAR03025	Cyclin-A2	CCNA2	P20248
		TAR03276	Nuclear receptor coactivator 2	NCOA2	Q15596
MOL000511	ursolic acid	TAR00003	Nitric oxide synthase, inducible	NOS2	P35228
		TAR00006	Prostaglandin G/H synthase 1	PTGS1	P23219
		TAR00046	Estrogen receptor	ESR1	P03372
		TAR00048	Androgen receptor	AR	P10275
		TAR00086	Apoptosis regulator Bcl-2	BCL2	P10415
		TAR00094	Prostaglandin G/H synthase 2	PTGS2	P35354
		TAR00165	Acetylcholinesterase	ACHE	P22303
		TAR00238	72 kDa type IV collagenase	MMP2	P08253
		TAR00265	Tumor necrosis factor	TNF	P01375
		TAR00308	Glucocorticoid receptor	NR3C1	P04150
		TAR00346	Urokinase-type plasminogen activator	PLAU	P00749
		TAR00351	Interleukin-6	IL6	P05231
		TAR00353	Interstitial collagenase	MMP1	P03956
		TAR00361	Cathepsin B	CTSB	P07858
		TAR00374	Fatty acid synthase	FASN	P49327
		TAR00400	Pleiotrophin	PTN	P21246
		TAR00414	Transcription factor AP-1	JUN	P05412
		TAR00418	Interleukin-1 beta	IL1B	P01584
		TAR00427	E-selectin	SELE	P16581
		TAR00441	Stromelysin-1	MMP3	P08254
		TAR00482	Cyclin-dependent kinase 2	CDK2	P24941
		TAR00571	Cyclin-dependent kinase 6	CDK6	Q00534
		TAR00573	Cyclin-dependent kinase 4	CDK4	P11802
		TAR00593	Prostaglandin E2 receptor EP3 subtype	PTGER3	P43115
		TAR00646	Cellular tumor antigen p53	TP53	P04637
		TAR00704	Mitogen-activated protein kinase 8	MAPK8	P45983
		TAR00725	Stromelysin-2	MMP10	P09238
		TAR00740	Vascular endothelial growth factor A	VEGFA	P15692
MOL000513	3,4,5-trihydroxybenzoic acid	TAR00003	Nitric oxide synthase, inducible	NOS2	P35228
		TAR00006	Prostaglandin G/H synthase 1	PTGS1	P23219
		TAR00017	Prothrombin	F2	P00734
		TAR00046	Estrogen receptor	ESR1	P03372
		TAR00048	Androgen receptor	AR	P10275
		TAR00078	Peroxisome proliferator-activated receptor gamma	PPARG	P37231
		TAR00094	Prostaglandin G/H synthase 2	PTGS2	P35354
		TAR00117	Carbonic anhydrase 2	CA2	P00918
		TAR00165	Acetylcholinesterase	ACHE	P22303
		TAR00209	Progesterone receptor	PGR	P06401
		TAR00229	Tyrosine-protein phosphatase non-receptor type 1	PTPN1	P18031
		TAR00307	Estrogen receptor beta	ESR2	Q92731
		TAR00332	Dipeptidyl peptidase 4	DPP4	P27487
		TAR00374	Fatty acid synthase	FASN	P49327
		TAR00402	Mitogen-activated protein kinase 14	MAPK14	Q16539
		TAR00422	Glycogen synthase kinase-3 beta	GSK3B	P49841
		TAR00482	Cyclin-dependent kinase 2	CDK2	P24941
		TAR00491	Phosphatidylinositol 4,5-bisphosphate 3-kinase catalytic subunit gamma isoform	PIK3CG	P48736
		TAR00499	Endoribonuclease LACTB2	LACTB2	Q53H82
		TAR00565	Amine oxidase [flavin-containing] B	MAOB	P27338
		TAR00646	Cellular tumor antigen p53	TP53	P04637
		TAR02928	Trypsin-1	PRSS1	P07477
		TAR02959	Microsomal glutathione S-transferase 1	MGST1	P10620
		TAR02966	Serine/threonine-protein kinase pim-1	PIM1	P11309
		TAR03025	Cyclin-A2	CCNA2	P20248
MOL000561	Astragalin	TAR00003	Nitric oxide synthase, inducible	NOS2	P35228
		TAR00006	Prostaglandin G/H synthase 1	PTGS1	P23219
		TAR00017	Prothrombin	F2	P00734
		TAR00037	Potassium voltage-gated channel subfamily H member 2	KCNH2	Q12809
		TAR00046	Estrogen receptor	ESR1	P03372
		TAR00048	Androgen receptor	AR	P10275
		TAR00078	Peroxisome proliferator-activated receptor gamma	PPARG	P37231
		TAR00079	Coagulation factor X	F10	P00742
		TAR00094	Prostaglandin G/H synthase 2	PTGS2	P35354
		TAR00117	Carbonic anhydrase 2	CA2	P00918
		TAR00123	Coagulation factor VII	F7	P08709
		TAR00139	Vascular endothelial growth factor receptor 1	FLT1	P17948
		TAR00229	Tyrosine-protein phosphatase non-receptor type 1	PTPN1	P18031
		TAR00307	Estrogen receptor beta	ESR2	Q92731
		TAR00332	Dipeptidyl peptidase 4	DPP4	P27487
		TAR00402	Mitogen-activated protein kinase 14	MAPK14	Q16539
		TAR00422	Glycogen synthase kinase-3 beta	GSK3B	P49841
		TAR00482	Cyclin-dependent kinase 2	CDK2	P24941
		TAR00491	Phosphatidylinositol 4,5-bisphosphate 3-kinase catalytic subunit gamma isoform	PIK3CG	P48736
		TAR00647	Serine/threonine-protein kinase Chk1	CHEK1	O14757
		TAR00699	cAMP-dependent protein kinase catalytic subunit alpha	PRKACA	P17612
		TAR02928	Trypsin-1	PRSS1	P07477
		TAR02966	Serine/threonine-protein kinase pim-1	PIM1	P11309
		TAR03025	Cyclin-A2	CCNA2	P20248
		TAR03276	Nuclear receptor coactivator 2	NCOA2	Q15596
MOL000749	Linoleic	TAR00003	Nitric oxide synthase, inducible	NOS2	P35228
		TAR00006	Prostaglandin G/H synthase 1	PTGS1	P23219
		TAR00017	Prothrombin	F2	P00734
		TAR00038	Muscarinic acetylcholine receptor M1	CHRM1	P11229
		TAR00046	Estrogen receptor	ESR1	P03372
		TAR00063	Beta-1 adrenergic receptor	ADRB1	P08588
		TAR00078	Peroxisome proliferator-activated receptor gamma	PPARG	P37231
		TAR00094	Prostaglandin G/H synthase 2	PTGS2	P35354
		TAR00095	Nitric oxide synthase, endothelial	NOS3	P29474
		TAR00105	Alpha-2A adrenergic receptor	ADRA2A	P08913
		TAR00117	Carbonic anhydrase 2	CA2	P00918
		TAR00158	Retinoic acid receptor RXR-alpha	RXRA	P19793
		TAR00165	Acetylcholinesterase	ACHE	P22303
		TAR00186	Sodium-dependent noradrenaline transporter	SLC6A2	P23975
		TAR00210	Muscarinic acetylcholine receptor M2	CHRM2	P08172
		TAR00214	Alpha-2B adrenergic receptor	ADRA2B	P18089
		TAR00239	Sodium-dependent dopamine transporter	SLC6A3	Q01959
		TAR00261	Beta-2 adrenergic receptor	ADRB2	P07550
		TAR00290	Sodium-dependent serotonin transporter	SLC6A4	P31645
		TAR00332	Dipeptidyl peptidase 4	DPP4	P27487
		TAR00499	Endoribonuclease LACTB2	LACTB2	Q53H82
		TAR00565	Amine oxidase [flavin-containing] B	MAOB	P27338
		TAR03276	Nuclear receptor coactivator 2	NCOA2	Q15596
MOL000935	Hepanal	TAR00016	Muscarinic acetylcholine receptor M3	CHRM3	P20309
		TAR00017	Prothrombin	F2	P00734
		TAR00046	Estrogen receptor	ESR1	P03372
		TAR00095	Nitric oxide synthase, endothelial	NOS3	P29474
		TAR00165	Acetylcholinesterase	ACHE	P22303
		TAR00210	Muscarinic acetylcholine receptor M2	CHRM2	P08172
		TAR00727	Alcohol dehydrogenase 1C	ADH1C	P00326
		TAR01201	Immunoglobulin heavy constant gamma 1	IGHG1	P01857
		TAR02928	Trypsin-1	PRSS1	P07477
MOL001002	ellagic acid	TAR00046	Estrogen receptor	ESR1	P03372
		TAR00048	Androgen receptor	AR	P10275
		TAR00209	Progesterone receptor	PGR	P06401
		TAR00238	72 kDa type IV collagenase	MMP2	P08253
		TAR00482	Cyclin-dependent kinase 2	CDK2	P24941
		TAR00733	Glutathione S-transferase P	GSTP1	P09211
		TAR00740	Vascular endothelial growth factor A	VEGFA	P15692
		TAR00766	Glutathione S-transferase A1	GSTA1	P08263
		TAR02952	Glutathione S-transferase Mu 1	GSTM1	P09488
		TAR03674	Glutathione S-transferase A2	GSTA2	P09210
		TAR03688	Glutathione S-transferase Mu 2	GSTM2	P28161
MOL001300	PEL	TAR00117	Carbonic anhydrase 2	CA2	P00918
		TAR00566	Amine oxidase [flavin-containing] A	MAOA	P21397
		TAR00726	Alcohol dehydrogenase 1B	ADH1B	P00325
		TAR00727	Alcohol dehydrogenase 1C	ADH1C	P00326
		TAR00729	Alcohol dehydrogenase 1A	ADH1A	P07327
		TAR02928	Trypsin-1	PRSS1	P07477
		TAR03952	Trypsin-3	PRSS3	P35030
MOL001308		TAR00003	Nitric oxide synthase, inducible	NOS2	P35228
		TAR00006	Prostaglandin G/H synthase 1	PTGS1	P23219
		TAR00016	Muscarinic acetylcholine receptor M3	CHRM3	P20309
		TAR00017	Prothrombin	F2	P00734
		TAR00037	Potassium voltage-gated channel subfamily H member 2	KCNH2	Q12809
		TAR00038	Muscarinic acetylcholine receptor M1	CHRM1	P11229
		TAR00046	Estrogen receptor	ESR1	P03372
		TAR00048	Androgen receptor	AR	P10275
		TAR00070	Sodium channel protein type 5 subunit alpha	SCN5A	Q14524
		TAR00078	Peroxisome proliferator-activated receptor gamma	PPARG	P37231
		TAR00079	Coagulation factor X	F10	P00742
		TAR00094	Prostaglandin G/H synthase 2	PTGS2	P35354
		TAR00095	Nitric oxide synthase, endothelial	NOS3	P29474
		TAR00117	Carbonic anhydrase 2	CA2	P00918
		TAR00123	Coagulation factor VII	F7	P08709
		TAR00158	Retinoic acid receptor RXR-alpha	RXRA	P19793
		TAR00163	Delta-type opioid receptor	OPRD1	P41143
		TAR00165	Acetylcholinesterase	ACHE	P22303
		TAR00172	cGMP-inhibited 3',5'-cyclic phosphodiesterase A	PDE3A	Q14432
		TAR00209	Progesterone receptor	PGR	P06401
		TAR00216	Alpha-1B adrenergic receptor	ADRA1B	P35368
		TAR00229	Tyrosine-protein phosphatase non-receptor type 1	PTPN1	P18031
		TAR00261	Beta-2 adrenergic receptor	ADRB2	P07550
		TAR00272	Alpha-1D adrenergic receptor	ADRA1D	P25100
		TAR00307	Estrogen receptor beta	ESR2	Q92731
		TAR00332	Dipeptidyl peptidase 4	DPP4	P27487
		TAR00402	Mitogen-activated protein kinase 14	MAPK14	Q16539
		TAR00422	Glycogen synthase kinase-3 beta	GSK3B	P49841
		TAR00477	Rhodopsin	RHO	P08100
		TAR00482	Cyclin-dependent kinase 2	CDK2	P24941
		TAR00647	Serine/threonine-protein kinase Chk1	CHEK1	O14757
		TAR00789	Retinoic acid receptor RXR-beta	RXRB	P28702
		TAR01201	Immunoglobulin heavy constant gamma 1	IGHG1	P01857
		TAR02928	Trypsin-1	PRSS1	P07477
		TAR02966	Serine/threonine-protein kinase pim-1	PIM1	P11309
		TAR03025	Cyclin-A2	CCNA2	P20248
		TAR03276	Nuclear receptor coactivator 2	NCOA2	Q15596
		TAR03727	Calcium-activated potassium channel subunit alpha-1	KCNMA1	Q12791
		TAR00003	Nitric oxide synthase, inducible	NOS2	P35228
		TAR00017	Prothrombin	F2	P00734
		TAR00028	Nitric oxide synthase, brain	NOS1	P29475
		TAR00079	Coagulation factor X	F10	P00742
		TAR00094	Prostaglandin G/H synthase 2	PTGS2	P35354
		TAR00095	Nitric oxide synthase, endothelial	NOS3	P29474
		TAR00117	Carbonic anhydrase 2	CA2	P00918
		TAR00165	Acetylcholinesterase	ACHE	P22303
		TAR00229	Tyrosine-protein phosphatase non-receptor type 1	PTPN1	P18031
		TAR00288	Aldose reductase	AKR1B1	P15121
		TAR00309	Gamma-aminobutyric acid receptor subunit alpha-1	GABRA1	P14867
		TAR00319	Proto-oncogene tyrosine-protein kinase Src	SRC	P12931
		TAR00332	Dipeptidyl peptidase 4	DPP4	P27487
		TAR00363	Cathepsin D	CTSD	P07339
		TAR00482	Cyclin-dependent kinase 2	CDK2	P24941
		TAR00499	Endoribonuclease LACTB2	LACTB2	Q53H82
		TAR01201	Immunoglobulin heavy constant gamma 1	IGHG1	P01857
		TAR02928	Trypsin-1	PRSS1	P07477
		TAR02966	Serine/threonine-protein kinase pim-1	PIM1	P11309
		TAR02995	Carboxypeptidase B2	CPB2	Q96IY4
		TAR03216	Glutamate receptor 2	GRIA2	P42262
		TAR03651	Glutamate receptor ionotropic, kainate 2	GRIK2	Q13002
		TAR03797	Triosephosphate isomerase	TPI1	P60174
MOL001578	Hypnon	TAR00117	Carbonic anhydrase 2	CA2	P00918
		TAR00482	Cyclin-dependent kinase 2	CDK2	P24941
		TAR00726	Alcohol dehydrogenase 1B	ADH1B	P00325
		TAR00727	Alcohol dehydrogenase 1C	ADH1C	P00326
		TAR00729	Alcohol dehydrogenase 1A	ADH1A	P07327
		TAR01172	Lysozyme C	LYZ	P61626
		TAR02928	Trypsin-1	PRSS1	P07477
		TAR03952	Trypsin-3	PRSS3	P35030
MOL001717	PELTATIN BB600:B617B600:B616B60B600:B619	TAR00006	Prostaglandin G/H synthase 1	PTGS1	P23219
		TAR00017	Prothrombin	F2	P00734
		TAR00037	Potassium voltage-gated channel subfamily H member 2	KCNH2	Q12809
		TAR00046	Estrogen receptor	ESR1	P03372
		TAR00048	Androgen receptor	AR	P10275
		TAR00079	Coagulation factor X	F10	P00742
		TAR00094	Prostaglandin G/H synthase 2	PTGS2	P35354
		TAR00117	Carbonic anhydrase 2	CA2	P00918
		TAR00123	Coagulation factor VII	F7	P08709
		TAR00139	Vascular endothelial growth factor receptor 1	FLT1	P17948
		TAR00229	Tyrosine-protein phosphatase non-receptor type 1	PTPN1	P18031
		TAR00307	Estrogen receptor beta	ESR2	Q92731
		TAR00332	Dipeptidyl peptidase 4	DPP4	P27487
		TAR00422	Glycogen synthase kinase-3 beta	GSK3B	P49841
		TAR00647	Serine/threonine-protein kinase Chk1	CHEK1	O14757
		TAR02928	Trypsin-1	PRSS1	P07477
		TAR02966	Serine/threonine-protein kinase pim-1	PIM1	P11309
		TAR03276	Nuclear receptor coactivator 2	NCOA2	Q15596
		TAR03279	Nuclear receptor coactivator 1	NCOA1	Q15788
		TAR03727	Calcium-activated potassium channel subunit alpha-1	KCNMA1	Q12791
MOL001906	Methylgallate	TAR00006	Prostaglandin G/H synthase 1	PTGS1	P23219
		TAR00017	Prothrombin	F2	P00734
		TAR00094	Prostaglandin G/H synthase 2	PTGS2	P35354
		TAR00105	Alpha-2A adrenergic receptor	ADRA2A	P08913
		TAR00117	Carbonic anhydrase 2	CA2	P00918
		TAR00332	Dipeptidyl peptidase 4	DPP4	P27487
		TAR00499	Endoribonuclease LACTB2	LACTB2	Q53H82
		TAR00565	Amine oxidase [flavin-containing] B	MAOB	P27338
		TAR02928	Trypsin-1	PRSS1	P07477
		TAR03216	Glutamate receptor 2	GRIA2	P42262
MOL002077	1-[(2S)-2-piperidyl]acetone	TAR00017	Prothrombin	F2	P00734
		TAR00038	Muscarinic acetylcholine receptor M1	CHRM1	P11229
		TAR00117	Carbonic anhydrase 2	CA2	P00918
		TAR00210	Muscarinic acetylcholine receptor M2	CHRM2	P08172
		TAR00309	Gamma-aminobutyric acid receptor subunit alpha-1	GABRA1	P14867
		TAR00332	Dipeptidyl peptidase 4	DPP4	P27487
		TAR00726	Alcohol dehydrogenase 1B	ADH1B	P00325
		TAR00727	Alcohol dehydrogenase 1C	ADH1C	P00326
		TAR02928	Trypsin-1	PRSS1	P07477
		TAR02928	Trypsin-1	PRSS1	P07477
MOL002683	Ligla	TAR00003	Nitric oxide synthase, inducible	NOS2	P35228
		TAR00006	Prostaglandin G/H synthase 1	PTGS1	P23219
		TAR00017	Prothrombin	F2	P00734
		TAR00046	Estrogen receptor	ESR1	P03372
		TAR00078	Peroxisome proliferator-activated receptor gamma	PPARG	P37231
		TAR00094	Prostaglandin G/H synthase 2	PTGS2	P35354
		TAR00095	Nitric oxide synthase, endothelial	NOS3	P29474
		TAR00158	Retinoic acid receptor RXR-alpha	RXRA	P19793
		TAR00165	Acetylcholinesterase	ACHE	P22303
		TAR00186	Sodium-dependent noradrenaline transporter	SLC6A2	P23975
		TAR00210	Muscarinic acetylcholine receptor M2	CHRM2	P08172
		TAR00267	Retinoic acid receptor RXR-gamma	RXRG	P48443
		TAR00332	Dipeptidyl peptidase 4	DPP4	P27487
MOL002850	butylated hydroxytoluene	TAR00016	Muscarinic acetylcholine receptor M3	CHRM3	P20309
		TAR00038	Muscarinic acetylcholine receptor M1	CHRM1	P11229
		TAR00063	Beta-1 adrenergic receptor	ADRB1	P08588
		TAR00070	Sodium channel protein type 5 subunit alpha	SCN5A	Q14524
		TAR00139	Vascular endothelial growth factor receptor 1	FLT1	P17948
		TAR00158	Retinoic acid receptor RXR-alpha	RXRA	P19793
		TAR00165	Acetylcholinesterase	ACHE	P22303
		TAR00186	Sodium-dependent noradrenaline transporter	SLC6A2	P23975
		TAR00191	Alpha-1A adrenergic receptor	ADRA1A	P35348
		TAR00210	Muscarinic acetylcholine receptor M2	CHRM2	P08172
		TAR00216	Alpha-1B adrenergic receptor	ADRA1B	P35368
		TAR00239	Sodium-dependent dopamine transporter	SLC6A3	Q01959
		TAR00261	Beta-2 adrenergic receptor	ADRB2	P07550
		TAR00290	Sodium-dependent serotonin transporter	SLC6A4	P31645
		TAR02132	Heme oxygenase 1	HMOX1	P09601
		TAR03350	Glutamate receptor ionotropic, NMDA 3A	GRIN3A	Q8TCU5
MOL003395	(3S,8S,9S,10R,13R,14S,17R)-17-[(1R,4R)-1,4-dimethylhexyl]-10,13-dimethyl-2,3,4,7,8,9,11,12,14,15,16,17-dodecahydro-1H-cyclopenta[a]phenanthren-3-ol	TAR00046	Estrogen receptor	ESR1	P03372
		TAR00048	Androgen receptor	AR	P10275
		TAR00209	Progesterone receptor	PGR	P06401
		TAR03276	Nuclear receptor coactivator 2	NCOA2	Q15596
MOL004800	pelargonidin-3-O-glucoside	TAR00094	Prostaglandin G/H synthase 2	PTGS2	P35354
		TAR00229	Tyrosine-protein phosphatase non-receptor type 1	PTPN1	P18031
		TAR02966	Serine/threonine-protein kinase pim-1	PIM1	P11309
MOL004807	glucuronic acid	TAR00003	Nitric oxide synthase, inducible	NOS2	P35228
		TAR00017	Prothrombin	F2	P00734
		TAR00094	Prostaglandin G/H synthase 2	PTGS2	P35354
		TAR00117	Carbonic anhydrase 2	CA2	P00918
		TAR00332	Dipeptidyl peptidase 4	DPP4	P27487
		TAR00499	Endoribonuclease LACTB2	LACTB2	Q53H82
		TAR00597	Superoxide dismutase [Cu-Zn]	SOD1	P00441
		TAR00719	Lactase-phlorizin hydrolase	LCT	P09848
		TAR01201	Immunoglobulin heavy constant gamma 1	IGHG1	P01857
		TAR03216	Glutamate receptor 2	GRIA2	P42262
MOL005858	3,7,8-Tri-O-methylellagic acid	TAR00046	Estrogen receptor	ESR1	P03372
		TAR00048	Androgen receptor	AR	P10275
		TAR00209	Progesterone receptor	PGR	P06401
MOL006505	(-)-epicatechin	TAR00003	Nitric oxide synthase, inducible	NOS2	P35228
		TAR00006	Prostaglandin G/H synthase 1	PTGS1	P23219
		TAR00046	Estrogen receptor	ESR1	P03372
		TAR00048	Androgen receptor	AR	P10275
		TAR00078	Peroxisome proliferator-activated receptor gamma	PPARG	P37231
		TAR00081	Angiotensin-converting enzyme	ACE	P12821
		TAR00094	Prostaglandin G/H synthase 2	PTGS2	P35354
		TAR00117	Carbonic anhydrase 2	CA2	P00918
		TAR00158	Retinoic acid receptor RXR-alpha	RXRA	P19793
		TAR00229	Tyrosine-protein phosphatase non-receptor type 1	PTPN1	P18031
		TAR00265	Tumor necrosis factor	TNF	P01375
		TAR00307	Estrogen receptor beta	ESR2	Q92731
		TAR00332	Dipeptidyl peptidase 4	DPP4	P27487
		TAR00346	Urokinase-type plasminogen activator	PLAU	P00749
		TAR00351	Interleukin-6	IL6	P05231
		TAR00402	Mitogen-activated protein kinase 14	MAPK14	Q16539
		TAR00414	Transcription factor AP-1	JUN	P05412
		TAR00417	C-C motif chemokine 2	CCL2	P13500
		TAR00422	Glycogen synthase kinase-3 beta	GSK3B	P49841
		TAR00434	Tissue-type plasminogen activator	PLAT	P00750
		TAR00482	Cyclin-dependent kinase 2	CDK2	P24941
		TAR00499	Endoribonuclease LACTB2	LACTB2	Q53H82
		TAR00699	cAMP-dependent protein kinase catalytic subunit alpha	PRKACA	P17612
		TAR00744	NADPH--cytochrome P450 reductase	POR	P16435
		TAR02966	Serine/threonine-protein kinase pim-1	PIM1	P11309
		TAR03025	Cyclin-A2	CCNA2	P20248
		TAR03216	Glutamate receptor 2	GRIA2	P42262
		TAR03276	Nuclear receptor coactivator 2	NCOA2	Q15596
		TAR03532	Glutathione synthetase	GSS	P48637
		TAR03781	Glutamate--cysteine ligase catalytic subunit	GCLC	P48506
		TAR03978	Interleukin-2	IL2	P60568
MOL009274	Fritillaziebinol	TAR00046	Estrogen receptor	ESR1	P03372
		TAR00048	Androgen receptor	AR	P10275
		TAR00252	Mineralocorticoid receptor	NR3C2	P08235
MOL011039	Vaccenic acid	TAR00003	Nitric oxide synthase, inducible	NOS2	P35228
		TAR00006	Prostaglandin G/H synthase 1	PTGS1	P23219
		TAR00017	Prothrombin	F2	P00734
		TAR00078	Peroxisome proliferator-activated receptor gamma	PPARG	P37231
		TAR00095	Nitric oxide synthase, endothelial	NOS3	P29474
		TAR00165	Acetylcholinesterase	ACHE	P22303
		TAR01201	Immunoglobulin heavy constant gamma 1	IGHG1	P01857
		TAR03276	Nuclear receptor coactivator 2	NCOA2	Q15596

## Sheet: Honghua
The details of targets from compounds in Honghua
Molecule ID	Molecule Name	Target ID	Target Protein Name	Gene Symbol	Uniprot ID
MOL000024	alpha-humulene	TAR00265	Tumor necrosis factor	TNF	P01375
MOL000024	alpha-humulene	TAR00418	Interleukin-1 beta	IL1B	P01584
MOL000024	alpha-humulene	TAR00017	Prothrombin	F2	P00734
MOL000024	alpha-humulene	TAR00094	Prostaglandin G/H synthase 2	PTGS2	P35354
MOL000024	alpha-humulene	TAR00095	Nitric oxide synthase, endothelial	NOS3	P29474
MOL000024	alpha-humulene	TAR00099	Renin	REN	P00797
MOL000024	alpha-humulene	TAR00117	Carbonic anhydrase 2	CA2	P00918
MOL000024	alpha-humulene	TAR00165	Acetylcholinesterase	ACHE	P22303
MOL000024	alpha-humulene	TAR00186	Sodium-dependent noradrenaline transporter	SLC6A2	P23975
MOL000024	alpha-humulene	TAR00309	Gamma-aminobutyric acid receptor subunit alpha-1	GABRA1	P14867
MOL000024	alpha-humulene	TAR00332	Dipeptidyl peptidase 4	DPP4	P27487
MOL000024	alpha-humulene	TAR00726	Alcohol dehydrogenase 1B	ADH1B	P00325
MOL000024	alpha-humulene	TAR00727	Alcohol dehydrogenase 1C	ADH1C	P00326
MOL000024	alpha-humulene	TAR02928	Trypsin-1	PRSS1	P07477
MOL000024	alpha-humulene	TAR03276	Nuclear receptor coactivator 2	NCOA2	Q15596
MOL000036	beta-caryophyllene	TAR00351	Interleukin-6	IL6	P05231
MOL000036	beta-caryophyllene	TAR00006	Prostaglandin G/H synthase 1	PTGS1	P23219
MOL000036	beta-caryophyllene	TAR00016	Muscarinic acetylcholine receptor M3	CHRM3	P20309
MOL000036	beta-caryophyllene	TAR00017	Prothrombin	F2	P00734
MOL000036	beta-caryophyllene	TAR00038	Muscarinic acetylcholine receptor M1	CHRM1	P11229
MOL000036	beta-caryophyllene	TAR00046	Estrogen receptor	ESR1	P03372
MOL000036	beta-caryophyllene	TAR00094	Prostaglandin G/H synthase 2	PTGS2	P35354
MOL000036	beta-caryophyllene	TAR00095	Nitric oxide synthase, endothelial	NOS3	P29474
MOL000036	beta-caryophyllene	TAR00117	Carbonic anhydrase 2	CA2	P00918
MOL000036	beta-caryophyllene	TAR00141	Gamma-aminobutyric acid receptor subunit alpha-2	GABRA2	P47869
MOL000036	beta-caryophyllene	TAR00158	Retinoic acid receptor RXR-alpha	RXRA	P19793
MOL000036	beta-caryophyllene	TAR00165	Acetylcholinesterase	ACHE	P22303
MOL000036	beta-caryophyllene	TAR00186	Sodium-dependent noradrenaline transporter	SLC6A2	P23975
MOL000036	beta-caryophyllene	TAR00191	Alpha-1A adrenergic receptor	ADRA1A	P35348
MOL000036	beta-caryophyllene	TAR00210	Muscarinic acetylcholine receptor M2	CHRM2	P08172
MOL000036	beta-caryophyllene	TAR00216	Alpha-1B adrenergic receptor	ADRA1B	P35368
MOL000036	beta-caryophyllene	TAR00239	Sodium-dependent dopamine transporter	SLC6A3	Q01959
MOL000036	beta-caryophyllene	TAR00284	Neuronal acetylcholine receptor subunit alpha-2	CHRNA2	Q15822
MOL000036	beta-caryophyllene	TAR00309	Gamma-aminobutyric acid receptor subunit alpha-1	GABRA1	P14867
MOL000036	beta-caryophyllene	TAR00332	Dipeptidyl peptidase 4	DPP4	P27487
MOL000036	beta-caryophyllene	TAR00499	Endoribonuclease LACTB2	LACTB2	Q53H82
MOL000036	beta-caryophyllene	TAR02928	Trypsin-1	PRSS1	P07477
MOL000036	beta-caryophyllene	TAR03276	Nuclear receptor coactivator 2	NCOA2	Q15596
MOL000036	beta-caryophyllene	TAR03284	Gamma-aminobutyric acid receptor subunit alpha-6	GABRA6	Q16445
MOL000006	luteolin	TAR00003	Nitric oxide synthase, inducible	NOS2	P35228
MOL000006	luteolin	TAR00011	Insulin receptor	INSR	P06213
MOL000006	luteolin	TAR00048	Androgen receptor	AR	P10275
MOL000006	luteolin	TAR00094	Prostaglandin G/H synthase 2	PTGS2	P35354
MOL000006	luteolin	TAR00238	72 kDa type IV collagenase	MMP2	P08253
MOL000006	luteolin	TAR00265	Tumor necrosis factor	TNF	P01375
MOL000006	luteolin	TAR00298	Epidermal growth factor receptor	EGFR	P00533
MOL000006	luteolin	TAR00349	Hepatocyte growth factor receptor	MET	P08581
MOL000006	luteolin	TAR00351	Interleukin-6	IL6	P05231
MOL000006	luteolin	TAR00353	Interstitial collagenase	MMP1	P03956
MOL000006	luteolin	TAR00354	Mitogen-activated protein kinase 1	MAPK1	P28482
MOL000006	luteolin	TAR00365	Interferon gamma	IFNG	P01579
MOL000006	luteolin	TAR00414	Transcription factor AP-1	JUN	P05412
MOL000006	luteolin	TAR00482	Cyclin-dependent kinase 2	CDK2	P24941
MOL000006	luteolin	TAR00568	Xanthine dehydrogenase/oxidase [Includes: Xanthine dehydrogenase	XDH	P47989
MOL000006	luteolin	TAR00573	Cyclin-dependent kinase 4	CDK4	P11802
MOL000006	luteolin	TAR00646	Cellular tumor antigen p53	TP53	P04637
MOL000006	luteolin	TAR00648	Amyloid-beta A4 protein	APP	P05067
MOL000006	luteolin	TAR00733	Glutathione S-transferase P	GSTP1	P09211
MOL000006	luteolin	TAR00740	Vascular endothelial growth factor A	VEGFA	P15692
MOL000006	luteolin	TAR01293	DNA topoisomerase 1	TOP1	P11387
MOL000006	luteolin	TAR02132	Heme oxygenase 1	HMOX1	P09601
MOL000006	luteolin	TAR02915	Retinoblastoma-associated protein	RB1	P06400
MOL000006	luteolin	TAR03575	Caspase-7	CASP7	P55210
MOL000006	luteolin	TAR03978	Interleukin-2	IL2	P60568
MOL000006	luteolin	TAR00006	Prostaglandin G/H synthase 1	PTGS1	P23219
MOL000006	luteolin	TAR00046	Estrogen receptor	ESR1	P03372
MOL000006	luteolin	TAR00078	Peroxisome proliferator-activated receptor gamma	PPARG	P37231
MOL000006	luteolin	TAR00117	Carbonic anhydrase 2	CA2	P00918
MOL000006	luteolin	TAR00229	Tyrosine-protein phosphatase non-receptor type 1	PTPN1	P18031
MOL000006	luteolin	TAR00307	Estrogen receptor beta	ESR2	Q92731
MOL000006	luteolin	TAR00332	Dipeptidyl peptidase 4	DPP4	P27487
MOL000006	luteolin	TAR00402	Mitogen-activated protein kinase 14	MAPK14	Q16539
MOL000006	luteolin	TAR00422	Glycogen synthase kinase-3 beta	GSK3B	P49841
MOL000006	luteolin	TAR00491	Phosphatidylinositol 4,5-bisphosphate 3-kinase catalytic subunit gamma isoform	PIK3CG	P48736
MOL000006	luteolin	TAR00699	cAMP-dependent protein kinase catalytic subunit alpha	PRKACA	P17612
MOL000006	luteolin	TAR02928	Trypsin-1	PRSS1	P07477
MOL000006	luteolin	TAR02966	Serine/threonine-protein kinase pim-1	PIM1	P11309
MOL000006	luteolin	TAR03025	Cyclin-A2	CCNA2	P20248
MOL000006	luteolin	TAR03276	Nuclear receptor coactivator 2	NCOA2	Q15596
MOL000008	apigenin	TAR00003	Nitric oxide synthase, inducible	NOS2	P35228
MOL000008	apigenin	TAR00011	Insulin receptor	INSR	P06213
MOL000008	apigenin	TAR00046	Estrogen receptor	ESR1	P03372
MOL000008	apigenin	TAR00048	Androgen receptor	AR	P10275
MOL000008	apigenin	TAR00086	Apoptosis regulator Bcl-2	BCL2	P10415
MOL000008	apigenin	TAR00094	Prostaglandin G/H synthase 2	PTGS2	P35354
MOL000008	apigenin	TAR00153	Ornithine decarboxylase	ODC1	P11926
MOL000008	apigenin	TAR00222	Aldo-keto reductase family 1 member C3	AKR1C3	P42330
MOL000008	apigenin	TAR00231	Acetyl-CoA carboxylase 1	ACACA	Q13085
MOL000008	apigenin	TAR00265	Tumor necrosis factor	TNF	P01375
MOL000008	apigenin	TAR00346	Urokinase-type plasminogen activator	PLAU	P00749
MOL000008	apigenin	TAR00353	Interstitial collagenase	MMP1	P03956
MOL000008	apigenin	TAR00365	Interferon gamma	IFNG	P01579
MOL000008	apigenin	TAR00414	Transcription factor AP-1	JUN	P05412
MOL000008	apigenin	TAR00422	Glycogen synthase kinase-3 beta	GSK3B	P49841
MOL000008	apigenin	TAR00431	Cyclin-dependent kinase 1	CDK1	P06493
MOL000008	apigenin	TAR00482	Cyclin-dependent kinase 2	CDK2	P24941
MOL000008	apigenin	TAR00571	Cyclin-dependent kinase 6	CDK6	Q00534
MOL000008	apigenin	TAR00573	Cyclin-dependent kinase 4	CDK4	P11802
MOL000008	apigenin	TAR00646	Cellular tumor antigen p53	TP53	P04637
MOL000008	apigenin	TAR00740	Vascular endothelial growth factor A	VEGFA	P15692
MOL000008	apigenin	TAR00784	High affinity immunoglobulin epsilon receptor subunit alpha	FCER1A	P12319
MOL000008	apigenin	TAR02132	Heme oxygenase 1	HMOX1	P09601
MOL000008	apigenin	TAR02882	Insulin [Cleaved into: Insulin B chain; Insulin A chain]	INS	P01308
MOL000008	apigenin	TAR02915	Retinoblastoma-associated protein	RB1	P06400
MOL000008	apigenin	TAR03025	Cyclin-A2	CCNA2	P20248
MOL000008	apigenin	TAR03978	Interleukin-2	IL2	P60568
MOL000008	apigenin	TAR00006	Prostaglandin G/H synthase 1	PTGS1	P23219
MOL000008	apigenin	TAR00070	Sodium channel protein type 5 subunit alpha	SCN5A	Q14524
MOL000008	apigenin	TAR00078	Peroxisome proliferator-activated receptor gamma	PPARG	P37231
MOL000008	apigenin	TAR00079	Coagulation factor X	F10	P00742
MOL000008	apigenin	TAR00117	Carbonic anhydrase 2	CA2	P00918
MOL000008	apigenin	TAR00123	Coagulation factor VII	F7	P08709
MOL000008	apigenin	TAR00229	Tyrosine-protein phosphatase non-receptor type 1	PTPN1	P18031
MOL000008	apigenin	TAR00307	Estrogen receptor beta	ESR2	Q92731
MOL000008	apigenin	TAR00332	Dipeptidyl peptidase 4	DPP4	P27487
MOL000008	apigenin	TAR00402	Mitogen-activated protein kinase 14	MAPK14	Q16539
MOL000008	apigenin	TAR00491	Phosphatidylinositol 4,5-bisphosphate 3-kinase catalytic subunit gamma isoform	PIK3CG	P48736
MOL000008	apigenin	TAR00499	Endoribonuclease LACTB2	LACTB2	Q53H82
MOL000008	apigenin	TAR00647	Serine/threonine-protein kinase Chk1	CHEK1	O14757
MOL000008	apigenin	TAR00699	cAMP-dependent protein kinase catalytic subunit alpha	PRKACA	P17612
MOL000008	apigenin	TAR02928	Trypsin-1	PRSS1	P07477
MOL000008	apigenin	TAR02966	Serine/threonine-protein kinase pim-1	PIM1	P11309
MOL000008	apigenin	TAR03276	Nuclear receptor coactivator 2	NCOA2	Q15596
MOL000098	quercetin	TAR00003	Nitric oxide synthase, inducible	NOS2	P35228
MOL000098	quercetin	TAR00006	Prostaglandin G/H synthase 1	PTGS1	P23219
MOL000098	quercetin	TAR00011	Insulin receptor	INSR	P06213
MOL000098	quercetin	TAR00046	Estrogen receptor	ESR1	P03372
MOL000098	quercetin	TAR00048	Androgen receptor	AR	P10275
MOL000098	quercetin	TAR00086	Apoptosis regulator Bcl-2	BCL2	P10415
MOL000098	quercetin	TAR00088	Arachidonate 5-lipoxygenase	ALOX5	P09917
MOL000098	quercetin	TAR00094	Prostaglandin G/H synthase 2	PTGS2	P35354
MOL000098	quercetin	TAR00153	Ornithine decarboxylase	ODC1	P11926
MOL000098	quercetin	TAR00231	Acetyl-CoA carboxylase 1	ACACA	Q13085
MOL000098	quercetin	TAR00238	72 kDa type IV collagenase	MMP2	P08253
MOL000098	quercetin	TAR00265	Tumor necrosis factor	TNF	P01375
MOL000098	quercetin	TAR00298	Epidermal growth factor receptor	EGFR	P00533
MOL000098	quercetin	TAR00307	Estrogen receptor beta	ESR2	Q92731
MOL000098	quercetin	TAR00318	Maltase-glucoamylase, intestinal [Includes: Maltase	MGAM	O43451
MOL000098	quercetin	TAR00346	Urokinase-type plasminogen activator	PLAU	P00749
MOL000098	quercetin	TAR00351	Interleukin-6	IL6	P05231
MOL000098	quercetin	TAR00353	Interstitial collagenase	MMP1	P03956
MOL000098	quercetin	TAR00354	Mitogen-activated protein kinase 1	MAPK1	P28482
MOL000098	quercetin	TAR00357	Serum paraoxonase/arylesterase 1	PON1	P27169
MOL000098	quercetin	TAR00363	Cathepsin D	CTSD	P07339
MOL000098	quercetin	TAR00365	Interferon gamma	IFNG	P01579
MOL000098	quercetin	TAR00414	Transcription factor AP-1	JUN	P05412
MOL000098	quercetin	TAR00417	C-C motif chemokine 2	CCL2	P13500
MOL000098	quercetin	TAR00418	Interleukin-1 beta	IL1B	P01584
MOL000098	quercetin	TAR00422	Glycogen synthase kinase-3 beta	GSK3B	P49841
MOL000098	quercetin	TAR00427	E-selectin	SELE	P16581
MOL000098	quercetin	TAR00428	Myeloperoxidase	MPO	P05164
MOL000098	quercetin	TAR00431	Cyclin-dependent kinase 1	CDK1	P06493
MOL000098	quercetin	TAR00434	Tissue-type plasminogen activator	PLAT	P00750
MOL000098	quercetin	TAR00436	Gap junction alpha-1 protein	GJA1	P17302
MOL000098	quercetin	TAR00440	Vascular cell adhesion protein 1	VCAM1	P19320
MOL000098	quercetin	TAR00457	Thrombomodulin	THBD	P07204
MOL000098	quercetin	TAR00466	Tissue factor	F3	P13726
MOL000098	quercetin	TAR00470	NAD	NQO1	P15559
MOL000098	quercetin	TAR00568	Xanthine dehydrogenase/oxidase [Includes: Xanthine dehydrogenase	XDH	P47989
MOL000098	quercetin	TAR00593	Prostaglandin E2 receptor EP3 subtype	PTGER3	P43115
MOL000098	quercetin	TAR00597	Superoxide dismutase [Cu-Zn]	SOD1	P00441
MOL000098	quercetin	TAR00621	Cytochrome P450 3A4	CYP3A4	P08684
MOL000098	quercetin	TAR00646	Cellular tumor antigen p53	TP53	P04637
MOL000098	quercetin	TAR00724	Cytochrome P450 1A2	CYP1A2	P05177
MOL000098	quercetin	TAR00731	Collagen alpha-1	COL1A1	P02452
MOL000098	quercetin	TAR00733	Glutathione S-transferase P	GSTP1	P09211
MOL000098	quercetin	TAR00734	Pro-epidermal growth factor	EGF	P01133
MOL000098	quercetin	TAR00740	Vascular endothelial growth factor A	VEGFA	P15692
MOL000098	quercetin	TAR00744	NADPH--cytochrome P450 reductase	POR	P16435
MOL000098	quercetin	TAR00781	Estrogen sulfotransferase	SULT1E1	P49888
MOL000098	quercetin	TAR01293	DNA topoisomerase 1	TOP1	P11387
MOL000098	quercetin	TAR02132	Heme oxygenase 1	HMOX1	P09601
MOL000098	quercetin	TAR02885	Collagen alpha-1	COL3A1	P02461
MOL000098	quercetin	TAR02915	Retinoblastoma-associated protein	RB1	P06400
MOL000098	quercetin	TAR02952	Glutathione S-transferase Mu 1	GSTM1	P09488
MOL000098	quercetin	TAR02963	Endoplasmic reticulum chaperone BiP	HSPA5	P11021
MOL000098	quercetin	TAR02998	Prostatic acid phosphatase	ACPP	P15309
MOL000098	quercetin	TAR03204	Aryl hydrocarbon receptor	AHR	P35869
MOL000098	quercetin	TAR03688	Glutathione S-transferase Mu 2	GSTM2	P28161
MOL000098	quercetin	TAR03978	Interleukin-2	IL2	P60568
MOL000098	quercetin	TAR00017	Prothrombin	F2	P00734
MOL000098	quercetin	TAR00037	Potassium voltage-gated channel subfamily H member 2	KCNH2	Q12809
MOL000098	quercetin	TAR00070	Sodium channel protein type 5 subunit alpha	SCN5A	Q14524
MOL000098	quercetin	TAR00078	Peroxisome proliferator-activated receptor gamma	PPARG	P37231
MOL000098	quercetin	TAR00079	Coagulation factor X	F10	P00742
MOL000098	quercetin	TAR00095	Nitric oxide synthase, endothelial	NOS3	P29474
MOL000098	quercetin	TAR00117	Carbonic anhydrase 2	CA2	P00918
MOL000098	quercetin	TAR00123	Coagulation factor VII	F7	P08709
MOL000098	quercetin	TAR00158	Retinoic acid receptor RXR-alpha	RXRA	P19793
MOL000098	quercetin	TAR00165	Acetylcholinesterase	ACHE	P22303
MOL000098	quercetin	TAR00229	Tyrosine-protein phosphatase non-receptor type 1	PTPN1	P18031
MOL000098	quercetin	TAR00261	Beta-2 adrenergic receptor	ADRB2	P07550
MOL000098	quercetin	TAR00288	Aldose reductase	AKR1B1	P15121
MOL000098	quercetin	TAR00309	Gamma-aminobutyric acid receptor subunit alpha-1	GABRA1	P14867
MOL000098	quercetin	TAR00332	Dipeptidyl peptidase 4	DPP4	P27487
MOL000098	quercetin	TAR00402	Mitogen-activated protein kinase 14	MAPK14	Q16539
MOL000098	quercetin	TAR00441	Stromelysin-1	MMP3	P08254
MOL000098	quercetin	TAR00482	Cyclin-dependent kinase 2	CDK2	P24941
MOL000098	quercetin	TAR00491	Phosphatidylinositol 4,5-bisphosphate 3-kinase catalytic subunit gamma isoform	PIK3CG	P48736
MOL000098	quercetin	TAR00499	Endoribonuclease LACTB2	LACTB2	Q53H82
MOL000098	quercetin	TAR00565	Amine oxidase [flavin-containing] B	MAOB	P27338
MOL000098	quercetin	TAR00647	Serine/threonine-protein kinase Chk1	CHEK1	O14757
MOL000098	quercetin	TAR00699	cAMP-dependent protein kinase catalytic subunit alpha	PRKACA	P17612
MOL000098	quercetin	TAR02928	Trypsin-1	PRSS1	P07477
MOL000098	quercetin	TAR02966	Serine/threonine-protein kinase pim-1	PIM1	P11309
MOL000098	quercetin	TAR03025	Cyclin-A2	CCNA2	P20248
MOL000098	quercetin	TAR03276	Nuclear receptor coactivator 2	NCOA2	Q15596
MOL000131	EIC	TAR00003	Nitric oxide synthase, inducible	NOS2	P35228
MOL000131	EIC	TAR00006	Prostaglandin G/H synthase 1	PTGS1	P23219
MOL000131	EIC	TAR00017	Prothrombin	F2	P00734
MOL000131	EIC	TAR00038	Muscarinic acetylcholine receptor M1	CHRM1	P11229
MOL000131	EIC	TAR00046	Estrogen receptor	ESR1	P03372
MOL000131	EIC	TAR00078	Peroxisome proliferator-activated receptor gamma	PPARG	P37231
MOL000131	EIC	TAR00094	Prostaglandin G/H synthase 2	PTGS2	P35354
MOL000131	EIC	TAR00095	Nitric oxide synthase, endothelial	NOS3	P29474
MOL000131	EIC	TAR00117	Carbonic anhydrase 2	CA2	P00918
MOL000131	EIC	TAR00141	Gamma-aminobutyric acid receptor subunit alpha-2	GABRA2	P47869
MOL000131	EIC	TAR00158	Retinoic acid receptor RXR-alpha	RXRA	P19793
MOL000131	EIC	TAR00165	Acetylcholinesterase	ACHE	P22303
MOL000131	EIC	TAR00186	Sodium-dependent noradrenaline transporter	SLC6A2	P23975
MOL000131	EIC	TAR00210	Muscarinic acetylcholine receptor M2	CHRM2	P08172
MOL000131	EIC	TAR00309	Gamma-aminobutyric acid receptor subunit alpha-1	GABRA1	P14867
MOL000131	EIC	TAR00332	Dipeptidyl peptidase 4	DPP4	P27487
MOL000131	EIC	TAR00404	Transient receptor potential cation channel subfamily V member 1	TRPV1	Q8NER1
MOL000131	EIC	TAR01172	Lysozyme C	LYZ	P61626
MOL000131	EIC	TAR01201	Immunoglobulin heavy constant gamma 1	IGHG1	P01857
MOL000131	EIC	TAR02928	Trypsin-1	PRSS1	P07477
MOL000131	EIC	TAR03276	Nuclear receptor coactivator 2	NCOA2	Q15596
MOL000131	EIC	TAR03284	Gamma-aminobutyric acid receptor subunit alpha-6	GABRA6	Q16445
MOL000222	terephthaldehyde	TAR00117	Carbonic anhydrase 2	CA2	P00918
MOL000222	terephthaldehyde	TAR00332	Dipeptidyl peptidase 4	DPP4	P27487
MOL000222	terephthaldehyde	TAR00499	Endoribonuclease LACTB2	LACTB2	Q53H82
MOL000222	terephthaldehyde	TAR02928	Trypsin-1	PRSS1	P07477
MOL000286	β-amyrin acetate	TAR00003	Nitric oxide synthase, inducible	NOS2	P35228
MOL000286	β-amyrin acetate	TAR00006	Prostaglandin G/H synthase 1	PTGS1	P23219
MOL000286	β-amyrin acetate	TAR00017	Prothrombin	F2	P00734
MOL000286	β-amyrin acetate	TAR00048	Androgen receptor	AR	P10275
MOL000286	β-amyrin acetate	TAR00094	Prostaglandin G/H synthase 2	PTGS2	P35354
MOL000286	β-amyrin acetate	TAR00095	Nitric oxide synthase, endothelial	NOS3	P29474
MOL000286	β-amyrin acetate	TAR00117	Carbonic anhydrase 2	CA2	P00918
MOL000286	β-amyrin acetate	TAR00165	Acetylcholinesterase	ACHE	P22303
MOL000286	β-amyrin acetate	TAR00332	Dipeptidyl peptidase 4	DPP4	P27487
MOL000286	β-amyrin acetate	TAR00482	Cyclin-dependent kinase 2	CDK2	P24941
MOL000286	β-amyrin acetate	TAR00499	Endoribonuclease LACTB2	LACTB2	Q53H82
MOL000286	β-amyrin acetate	TAR00565	Amine oxidase [flavin-containing] B	MAOB	P27338
MOL000286	β-amyrin acetate	TAR00566	Amine oxidase [flavin-containing] A	MAOA	P21397
MOL000286	β-amyrin acetate	TAR01172	Lysozyme C	LYZ	P61626
MOL000286	β-amyrin acetate	TAR01696	Chymotrypsinogen B	CTRB1	P17538
MOL000286	β-amyrin acetate	TAR02928	Trypsin-1	PRSS1	P07477
MOL000340	HCI	TAR00006	Prostaglandin G/H synthase 1	PTGS1	P23219
MOL000340	HCI	TAR00017	Prothrombin	F2	P00734
MOL000340	HCI	TAR00094	Prostaglandin G/H synthase 2	PTGS2	P35354
MOL000340	HCI	TAR00095	Nitric oxide synthase, endothelial	NOS3	P29474
MOL000340	HCI	TAR00117	Carbonic anhydrase 2	CA2	P00918
MOL000340	HCI	TAR00186	Sodium-dependent noradrenaline transporter	SLC6A2	P23975
MOL000340	HCI	TAR00239	Sodium-dependent dopamine transporter	SLC6A3	Q01959
MOL000340	HCI	TAR00332	Dipeptidyl peptidase 4	DPP4	P27487
MOL000340	HCI	TAR00499	Endoribonuclease LACTB2	LACTB2	Q53H82
MOL000340	HCI	TAR00565	Amine oxidase [flavin-containing] B	MAOB	P27338
MOL000340	HCI	TAR00566	Amine oxidase [flavin-containing] A	MAOA	P21397
MOL000340	HCI	TAR00727	Alcohol dehydrogenase 1C	ADH1C	P00326
MOL000340	HCI	TAR01172	Lysozyme C	LYZ	P61626
MOL000340	HCI	TAR02928	Trypsin-1	PRSS1	P07477
MOL000347	Syrigin	TAR00003	Nitric oxide synthase, inducible	NOS2	P35228
MOL000347	Syrigin	TAR00006	Prostaglandin G/H synthase 1	PTGS1	P23219
MOL000347	Syrigin	TAR00016	Muscarinic acetylcholine receptor M3	CHRM3	P20309
MOL000347	Syrigin	TAR00017	Prothrombin	F2	P00734
MOL000347	Syrigin	TAR00038	Muscarinic acetylcholine receptor M1	CHRM1	P11229
MOL000347	Syrigin	TAR00046	Estrogen receptor	ESR1	P03372
MOL000347	Syrigin	TAR00048	Androgen receptor	AR	P10275
MOL000347	Syrigin	TAR00063	Beta-1 adrenergic receptor	ADRB1	P08588
MOL000347	Syrigin	TAR00078	Peroxisome proliferator-activated receptor gamma	PPARG	P37231
MOL000347	Syrigin	TAR00094	Prostaglandin G/H synthase 2	PTGS2	P35354
MOL000347	Syrigin	TAR00095	Nitric oxide synthase, endothelial	NOS3	P29474
MOL000347	Syrigin	TAR00105	Alpha-2A adrenergic receptor	ADRA2A	P08913
MOL000347	Syrigin	TAR00117	Carbonic anhydrase 2	CA2	P00918
MOL000347	Syrigin	TAR00186	Sodium-dependent noradrenaline transporter	SLC6A2	P23975
MOL000347	Syrigin	TAR00191	Alpha-1A adrenergic receptor	ADRA1A	P35348
MOL000347	Syrigin	TAR00210	Muscarinic acetylcholine receptor M2	CHRM2	P08172
MOL000347	Syrigin	TAR00214	Alpha-2B adrenergic receptor	ADRA2B	P18089
MOL000347	Syrigin	TAR00216	Alpha-1B adrenergic receptor	ADRA1B	P35368
MOL000347	Syrigin	TAR00239	Sodium-dependent dopamine transporter	SLC6A3	Q01959
MOL000347	Syrigin	TAR00261	Beta-2 adrenergic receptor	ADRB2	P07550
MOL000347	Syrigin	TAR00309	Gamma-aminobutyric acid receptor subunit alpha-1	GABRA1	P14867
MOL000347	Syrigin	TAR00332	Dipeptidyl peptidase 4	DPP4	P27487
MOL000347	Syrigin	TAR00482	Cyclin-dependent kinase 2	CDK2	P24941
MOL000347	Syrigin	TAR00499	Endoribonuclease LACTB2	LACTB2	Q53H82
MOL000347	Syrigin	TAR00521	Leukotriene A-4 hydrolase	LTA4H	P09960
MOL000347	Syrigin	TAR00565	Amine oxidase [flavin-containing] B	MAOB	P27338
MOL000347	Syrigin	TAR02928	Trypsin-1	PRSS1	P07477
MOL000347	Syrigin	TAR03025	Cyclin-A2	CCNA2	P20248
MOL000347	Syrigin	TAR03586	cAMP-dependent protein kinase inhibitor alpha	PKIA	P61925
MOL000348	4-[(Z)-3-hydroxyprop-1-enyl]-2,6-dimethoxyphenol	TAR00003	Nitric oxide synthase, inducible	NOS2	P35228
MOL000348	4-[(Z)-3-hydroxyprop-1-enyl]-2,6-dimethoxyphenol	TAR00006	Prostaglandin G/H synthase 1	PTGS1	P23219
MOL000348	4-[(Z)-3-hydroxyprop-1-enyl]-2,6-dimethoxyphenol	TAR00007	D	DRD1	P21728
MOL000348	4-[(Z)-3-hydroxyprop-1-enyl]-2,6-dimethoxyphenol	TAR00016	Muscarinic acetylcholine receptor M3	CHRM3	P20309
MOL000348	4-[(Z)-3-hydroxyprop-1-enyl]-2,6-dimethoxyphenol	TAR00017	Prothrombin	F2	P00734
MOL000348	4-[(Z)-3-hydroxyprop-1-enyl]-2,6-dimethoxyphenol	TAR00038	Muscarinic acetylcholine receptor M1	CHRM1	P11229
MOL000348	4-[(Z)-3-hydroxyprop-1-enyl]-2,6-dimethoxyphenol	TAR00046	Estrogen receptor	ESR1	P03372
MOL000348	4-[(Z)-3-hydroxyprop-1-enyl]-2,6-dimethoxyphenol	TAR00063	Beta-1 adrenergic receptor	ADRB1	P08588
MOL000348	4-[(Z)-3-hydroxyprop-1-enyl]-2,6-dimethoxyphenol	TAR00078	Peroxisome proliferator-activated receptor gamma	PPARG	P37231
MOL000348	4-[(Z)-3-hydroxyprop-1-enyl]-2,6-dimethoxyphenol	TAR00094	Prostaglandin G/H synthase 2	PTGS2	P35354
MOL000348	4-[(Z)-3-hydroxyprop-1-enyl]-2,6-dimethoxyphenol	TAR00095	Nitric oxide synthase, endothelial	NOS3	P29474
MOL000348	4-[(Z)-3-hydroxyprop-1-enyl]-2,6-dimethoxyphenol	TAR00105	Alpha-2A adrenergic receptor	ADRA2A	P08913
MOL000348	4-[(Z)-3-hydroxyprop-1-enyl]-2,6-dimethoxyphenol	TAR00117	Carbonic anhydrase 2	CA2	P00918
MOL000348	4-[(Z)-3-hydroxyprop-1-enyl]-2,6-dimethoxyphenol	TAR00186	Sodium-dependent noradrenaline transporter	SLC6A2	P23975
MOL000348	4-[(Z)-3-hydroxyprop-1-enyl]-2,6-dimethoxyphenol	TAR00191	Alpha-1A adrenergic receptor	ADRA1A	P35348
MOL000348	4-[(Z)-3-hydroxyprop-1-enyl]-2,6-dimethoxyphenol	TAR00210	Muscarinic acetylcholine receptor M2	CHRM2	P08172
MOL000348	4-[(Z)-3-hydroxyprop-1-enyl]-2,6-dimethoxyphenol	TAR00214	Alpha-2B adrenergic receptor	ADRA2B	P18089
MOL000348	4-[(Z)-3-hydroxyprop-1-enyl]-2,6-dimethoxyphenol	TAR00216	Alpha-1B adrenergic receptor	ADRA1B	P35368
MOL000348	4-[(Z)-3-hydroxyprop-1-enyl]-2,6-dimethoxyphenol	TAR00239	Sodium-dependent dopamine transporter	SLC6A3	Q01959
MOL000348	4-[(Z)-3-hydroxyprop-1-enyl]-2,6-dimethoxyphenol	TAR00261	Beta-2 adrenergic receptor	ADRB2	P07550
MOL000348	4-[(Z)-3-hydroxyprop-1-enyl]-2,6-dimethoxyphenol	TAR00309	Gamma-aminobutyric acid receptor subunit alpha-1	GABRA1	P14867
MOL000348	4-[(Z)-3-hydroxyprop-1-enyl]-2,6-dimethoxyphenol	TAR00332	Dipeptidyl peptidase 4	DPP4	P27487
MOL000348	4-[(Z)-3-hydroxyprop-1-enyl]-2,6-dimethoxyphenol	TAR00346	Urokinase-type plasminogen activator	PLAU	P00749
MOL000348	4-[(Z)-3-hydroxyprop-1-enyl]-2,6-dimethoxyphenol	TAR00482	Cyclin-dependent kinase 2	CDK2	P24941
MOL000348	4-[(Z)-3-hydroxyprop-1-enyl]-2,6-dimethoxyphenol	TAR00499	Endoribonuclease LACTB2	LACTB2	Q53H82
MOL000348	4-[(Z)-3-hydroxyprop-1-enyl]-2,6-dimethoxyphenol	TAR00521	Leukotriene A-4 hydrolase	LTA4H	P09960
MOL000348	4-[(Z)-3-hydroxyprop-1-enyl]-2,6-dimethoxyphenol	TAR00565	Amine oxidase [flavin-containing] B	MAOB	P27338
MOL000348	4-[(Z)-3-hydroxyprop-1-enyl]-2,6-dimethoxyphenol	TAR02928	Trypsin-1	PRSS1	P07477
MOL000348	4-[(Z)-3-hydroxyprop-1-enyl]-2,6-dimethoxyphenol	TAR03025	Cyclin-A2	CCNA2	P20248
MOL000348	4-[(Z)-3-hydroxyprop-1-enyl]-2,6-dimethoxyphenol	TAR03586	cAMP-dependent protein kinase inhibitor alpha	PKIA	P61925
MOL000356	lupeol	TAR00046	Estrogen receptor	ESR1	P03372
MOL000356	lupeol	TAR00086	Apoptosis regulator Bcl-2	BCL2	P10415
MOL000356	lupeol	TAR00431	Cyclin-dependent kinase 1	CDK1	P06493
MOL000356	lupeol	TAR00597	Superoxide dismutase [Cu-Zn]	SOD1	P00441
MOL000356	lupeol	TAR00696	Serine/threonine-protein kinase PLK1	PLK1	P53350
MOL000356	lupeol	TAR03053	Apoptotic protease-activating factor 1	APAF1	O14727
MOL000356	lupeol	TAR03223	Carnitine O-acetyltransferase	CRAT	P43155
MOL000356	lupeol	TAR00048	Androgen receptor	AR	P10275
MOL000356	lupeol	TAR00209	Progesterone receptor	PGR	P06401
MOL000357	Sitogluside	TAR00003	Nitric oxide synthase, inducible	NOS2	P35228
MOL000357	Sitogluside	TAR00006	Prostaglandin G/H synthase 1	PTGS1	P23219
MOL000357	Sitogluside	TAR00016	Muscarinic acetylcholine receptor M3	CHRM3	P20309
MOL000357	Sitogluside	TAR00017	Prothrombin	F2	P00734
MOL000357	Sitogluside	TAR00037	Potassium voltage-gated channel subfamily H member 2	KCNH2	Q12809
MOL000357	Sitogluside	TAR00038	Muscarinic acetylcholine receptor M1	CHRM1	P11229
MOL000357	Sitogluside	TAR00046	Estrogen receptor	ESR1	P03372
MOL000357	Sitogluside	TAR00048	Androgen receptor	AR	P10275
MOL000357	Sitogluside	TAR00070	Sodium channel protein type 5 subunit alpha	SCN5A	Q14524
MOL000357	Sitogluside	TAR00078	Peroxisome proliferator-activated receptor gamma	PPARG	P37231
MOL000357	Sitogluside	TAR00079	Coagulation factor X	F10	P00742
MOL000357	Sitogluside	TAR00094	Prostaglandin G/H synthase 2	PTGS2	P35354
MOL000357	Sitogluside	TAR00095	Nitric oxide synthase, endothelial	NOS3	P29474
MOL000357	Sitogluside	TAR00113	5-hydroxytryptamine receptor 3A	HTR3A	P46098
MOL000357	Sitogluside	TAR00158	Retinoic acid receptor RXR-alpha	RXRA	P19793
MOL000357	Sitogluside	TAR00172	cGMP-inhibited 3',5'-cyclic phosphodiesterase A	PDE3A	Q14432
MOL000357	Sitogluside	TAR00209	Progesterone receptor	PGR	P06401
MOL000357	Sitogluside	TAR00216	Alpha-1B adrenergic receptor	ADRA1B	P35368
MOL000357	Sitogluside	TAR00229	Tyrosine-protein phosphatase non-receptor type 1	PTPN1	P18031
MOL000357	Sitogluside	TAR00261	Beta-2 adrenergic receptor	ADRB2	P07550
MOL000357	Sitogluside	TAR00272	Alpha-1D adrenergic receptor	ADRA1D	P25100
MOL000357	Sitogluside	TAR00307	Estrogen receptor beta	ESR2	Q92731
MOL000357	Sitogluside	TAR00332	Dipeptidyl peptidase 4	DPP4	P27487
MOL000357	Sitogluside	TAR00402	Mitogen-activated protein kinase 14	MAPK14	Q16539
MOL000357	Sitogluside	TAR00422	Glycogen synthase kinase-3 beta	GSK3B	P49841
MOL000357	Sitogluside	TAR00482	Cyclin-dependent kinase 2	CDK2	P24941
MOL000357	Sitogluside	TAR00647	Serine/threonine-protein kinase Chk1	CHEK1	O14757
MOL000357	Sitogluside	TAR02928	Trypsin-1	PRSS1	P07477
MOL000357	Sitogluside	TAR02966	Serine/threonine-protein kinase pim-1	PIM1	P11309
MOL000357	Sitogluside	TAR03025	Cyclin-A2	CCNA2	P20248
MOL000357	Sitogluside	TAR03276	Nuclear receptor coactivator 2	NCOA2	Q15596
MOL000358	beta-sitosterol	TAR00086	Apoptosis regulator Bcl-2	BCL2	P10415
MOL000358	beta-sitosterol	TAR00357	Serum paraoxonase/arylesterase 1	PON1	P27169
MOL000358	beta-sitosterol	TAR00414	Transcription factor AP-1	JUN	P05412
MOL000358	beta-sitosterol	TAR03987	Mitogen-activated protein kinase 3	MAPK3	P27361
MOL000358	beta-sitosterol	TAR00003	Nitric oxide synthase, inducible	NOS2	P35228
MOL000358	beta-sitosterol	TAR00006	Prostaglandin G/H synthase 1	PTGS1	P23219
MOL000358	beta-sitosterol	TAR00007	D	DRD1	P21728
MOL000358	beta-sitosterol	TAR00016	Muscarinic acetylcholine receptor M3	CHRM3	P20309
MOL000358	beta-sitosterol	TAR00017	Prothrombin	F2	P00734
MOL000358	beta-sitosterol	TAR00037	Potassium voltage-gated channel subfamily H member 2	KCNH2	Q12809
MOL000358	beta-sitosterol	TAR00038	Muscarinic acetylcholine receptor M1	CHRM1	P11229
MOL000358	beta-sitosterol	TAR00046	Estrogen receptor	ESR1	P03372
MOL000358	beta-sitosterol	TAR00048	Androgen receptor	AR	P10275
MOL000358	beta-sitosterol	TAR00070	Sodium channel protein type 5 subunit alpha	SCN5A	Q14524
MOL000358	beta-sitosterol	TAR00078	Peroxisome proliferator-activated receptor gamma	PPARG	P37231
MOL000358	beta-sitosterol	TAR00094	Prostaglandin G/H synthase 2	PTGS2	P35354
MOL000358	beta-sitosterol	TAR00117	Carbonic anhydrase 2	CA2	P00918
MOL000358	beta-sitosterol	TAR00141	Gamma-aminobutyric acid receptor subunit alpha-2	GABRA2	P47869
MOL000358	beta-sitosterol	TAR00154	Muscarinic acetylcholine receptor M4	CHRM4	P08173
MOL000358	beta-sitosterol	TAR00165	Acetylcholinesterase	ACHE	P22303
MOL000358	beta-sitosterol	TAR00172	cGMP-inhibited 3',5'-cyclic phosphodiesterase A	PDE3A	Q14432
MOL000358	beta-sitosterol	TAR00175	5-hydroxytryptamine receptor 2A	HTR2A	P28223
MOL000358	beta-sitosterol	TAR00181	Gamma-aminobutyric acid receptor subunit alpha-5	GABRA5	P31644
MOL000358	beta-sitosterol	TAR00191	Alpha-1A adrenergic receptor	ADRA1A	P35348
MOL000358	beta-sitosterol	TAR00200	Gamma-aminobutyric acid receptor subunit alpha-3	GABRA3	P34903
MOL000358	beta-sitosterol	TAR00209	Progesterone receptor	PGR	P06401
MOL000358	beta-sitosterol	TAR00210	Muscarinic acetylcholine receptor M2	CHRM2	P08172
MOL000358	beta-sitosterol	TAR00216	Alpha-1B adrenergic receptor	ADRA1B	P35368
MOL000358	beta-sitosterol	TAR00229	Tyrosine-protein phosphatase non-receptor type 1	PTPN1	P18031
MOL000358	beta-sitosterol	TAR00261	Beta-2 adrenergic receptor	ADRB2	P07550
MOL000358	beta-sitosterol	TAR00284	Neuronal acetylcholine receptor subunit alpha-2	CHRNA2	Q15822
MOL000358	beta-sitosterol	TAR00290	Sodium-dependent serotonin transporter	SLC6A4	P31645
MOL000358	beta-sitosterol	TAR00299	Mu-type opioid receptor	OPRM1	P35372
MOL000358	beta-sitosterol	TAR00307	Estrogen receptor beta	ESR2	Q92731
MOL000358	beta-sitosterol	TAR00308	Glucocorticoid receptor	NR3C1	P04150
MOL000358	beta-sitosterol	TAR00309	Gamma-aminobutyric acid receptor subunit alpha-1	GABRA1	P14867
MOL000358	beta-sitosterol	TAR00332	Dipeptidyl peptidase 4	DPP4	P27487
MOL000358	beta-sitosterol	TAR00402	Mitogen-activated protein kinase 14	MAPK14	Q16539
MOL000358	beta-sitosterol	TAR00422	Glycogen synthase kinase-3 beta	GSK3B	P49841
MOL000358	beta-sitosterol	TAR00482	Cyclin-dependent kinase 2	CDK2	P24941
MOL000358	beta-sitosterol	TAR00491	Phosphatidylinositol 4,5-bisphosphate 3-kinase catalytic subunit gamma isoform	PIK3CG	P48736
MOL000358	beta-sitosterol	TAR00499	Endoribonuclease LACTB2	LACTB2	Q53H82
MOL000358	beta-sitosterol	TAR00581	Neuronal acetylcholine receptor subunit alpha-7	CHRNA7	P36544
MOL000358	beta-sitosterol	TAR00647	Serine/threonine-protein kinase Chk1	CHEK1	O14757
MOL000358	beta-sitosterol	TAR00699	cAMP-dependent protein kinase catalytic subunit alpha	PRKACA	P17612
MOL000358	beta-sitosterol	TAR02928	Trypsin-1	PRSS1	P07477
MOL000358	beta-sitosterol	TAR02966	Serine/threonine-protein kinase pim-1	PIM1	P11309
MOL000358	beta-sitosterol	TAR03025	Cyclin-A2	CCNA2	P20248
MOL000358	beta-sitosterol	TAR03276	Nuclear receptor coactivator 2	NCOA2	Q15596
MOL000360	FER	TAR00003	Nitric oxide synthase, inducible	NOS2	P35228
MOL000360	FER	TAR00006	Prostaglandin G/H synthase 1	PTGS1	P23219
MOL000360	FER	TAR00017	Prothrombin	F2	P00734
MOL000360	FER	TAR00078	Peroxisome proliferator-activated receptor gamma	PPARG	P37231
MOL000360	FER	TAR00094	Prostaglandin G/H synthase 2	PTGS2	P35354
MOL000360	FER	TAR00095	Nitric oxide synthase, endothelial	NOS3	P29474
MOL000360	FER	TAR00105	Alpha-2A adrenergic receptor	ADRA2A	P08913
MOL000360	FER	TAR00117	Carbonic anhydrase 2	CA2	P00918
MOL000360	FER	TAR00186	Sodium-dependent noradrenaline transporter	SLC6A2	P23975
MOL000360	FER	TAR00191	Alpha-1A adrenergic receptor	ADRA1A	P35348
MOL000360	FER	TAR00214	Alpha-2B adrenergic receptor	ADRA2B	P18089
MOL000360	FER	TAR00239	Sodium-dependent dopamine transporter	SLC6A3	Q01959
MOL000360	FER	TAR00261	Beta-2 adrenergic receptor	ADRB2	P07550
MOL000360	FER	TAR00332	Dipeptidyl peptidase 4	DPP4	P27487
MOL000360	FER	TAR00346	Urokinase-type plasminogen activator	PLAU	P00749
MOL000360	FER	TAR00482	Cyclin-dependent kinase 2	CDK2	P24941
MOL000360	FER	TAR00499	Endoribonuclease LACTB2	LACTB2	Q53H82
MOL000360	FER	TAR00521	Leukotriene A-4 hydrolase	LTA4H	P09960
MOL000360	FER	TAR00565	Amine oxidase [flavin-containing] B	MAOB	P27338
MOL000360	FER	TAR00566	Amine oxidase [flavin-containing] A	MAOA	P21397
MOL000360	FER	TAR00699	cAMP-dependent protein kinase catalytic subunit alpha	PRKACA	P17612
MOL000360	FER	TAR01696	Chymotrypsinogen B	CTRB1	P17538
MOL000360	FER	TAR02928	Trypsin-1	PRSS1	P07477
MOL000396	(+)-Syringaresinol	TAR00003	Nitric oxide synthase, inducible	NOS2	P35228
MOL000396	(+)-Syringaresinol	TAR00017	Prothrombin	F2	P00734
MOL000396	(+)-Syringaresinol	TAR00037	Potassium voltage-gated channel subfamily H member 2	KCNH2	Q12809
MOL000396	(+)-Syringaresinol	TAR00046	Estrogen receptor	ESR1	P03372
MOL000396	(+)-Syringaresinol	TAR00048	Androgen receptor	AR	P10275
MOL000396	(+)-Syringaresinol	TAR00070	Sodium channel protein type 5 subunit alpha	SCN5A	Q14524
MOL000396	(+)-Syringaresinol	TAR00078	Peroxisome proliferator-activated receptor gamma	PPARG	P37231
MOL000396	(+)-Syringaresinol	TAR00079	Coagulation factor X	F10	P00742
MOL000396	(+)-Syringaresinol	TAR00094	Prostaglandin G/H synthase 2	PTGS2	P35354
MOL000396	(+)-Syringaresinol	TAR00117	Carbonic anhydrase 2	CA2	P00918
MOL000396	(+)-Syringaresinol	TAR00165	Acetylcholinesterase	ACHE	P22303
MOL000396	(+)-Syringaresinol	TAR00307	Estrogen receptor beta	ESR2	Q92731
MOL000396	(+)-Syringaresinol	TAR00332	Dipeptidyl peptidase 4	DPP4	P27487
MOL000396	(+)-Syringaresinol	TAR02928	Trypsin-1	PRSS1	P07477
MOL000396	(+)-Syringaresinol	TAR02966	Serine/threonine-protein kinase pim-1	PIM1	P11309
MOL000396	(+)-Syringaresinol	TAR03025	Cyclin-A2	CCNA2	P20248
MOL000396	(+)-Syringaresinol	TAR03276	Nuclear receptor coactivator 2	NCOA2	Q15596
MOL000415	rutin	TAR00003	Nitric oxide synthase, inducible	NOS2	P35228
MOL000415	rutin	TAR00088	Arachidonate 5-lipoxygenase	ALOX5	P09917
MOL000415	rutin	TAR00265	Tumor necrosis factor	TNF	P01375
MOL000415	rutin	TAR00294	Thromboxane A2 receptor	TBXA2R	P21731
MOL000415	rutin	TAR00351	Interleukin-6	IL6	P05231
MOL000415	rutin	TAR00415	Integrin beta-2	ITGB2	P05107
MOL000415	rutin	TAR00418	Interleukin-1 beta	IL1B	P01584
MOL000415	rutin	TAR00597	Superoxide dismutase [Cu-Zn]	SOD1	P00441
MOL000415	rutin	TAR00733	Glutathione S-transferase P	GSTP1	P09211
MOL000415	rutin	TAR00735	Catalase	CAT	P04040
MOL000415	rutin	TAR00744	NADPH--cytochrome P450 reductase	POR	P16435
MOL000415	rutin	TAR01644	3-hydroxy-3-methylglutaryl-coenzyme A reductase	HMGCR	P04035
MOL000415	rutin	TAR02882	Insulin [Cleaved into: Insulin B chain; Insulin A chain]	INS	P01308
MOL000422	kaempferol	TAR00003	Nitric oxide synthase, inducible	NOS2	P35228
MOL000422	kaempferol	TAR00011	Insulin receptor	INSR	P06213
MOL000422	kaempferol	TAR00046	Estrogen receptor	ESR1	P03372
MOL000422	kaempferol	TAR00086	Apoptosis regulator Bcl-2	BCL2	P10415
MOL000422	kaempferol	TAR00088	Arachidonate 5-lipoxygenase	ALOX5	P09917
MOL000422	kaempferol	TAR00094	Prostaglandin G/H synthase 2	PTGS2	P35354
MOL000422	kaempferol	TAR00222	Aldo-keto reductase family 1 member C3	AKR1C3	P42330
MOL000422	kaempferol	TAR00265	Tumor necrosis factor	TNF	P01375
MOL000422	kaempferol	TAR00307	Estrogen receptor beta	ESR2	Q92731
MOL000422	kaempferol	TAR00353	Interstitial collagenase	MMP1	P03956
MOL000422	kaempferol	TAR00414	Transcription factor AP-1	JUN	P05412
MOL000422	kaempferol	TAR00427	E-selectin	SELE	P16581
MOL000422	kaempferol	TAR00431	Cyclin-dependent kinase 1	CDK1	P06493
MOL000422	kaempferol	TAR00440	Vascular cell adhesion protein 1	VCAM1	P19320
MOL000422	kaempferol	TAR00568	Xanthine dehydrogenase/oxidase [Includes: Xanthine dehydrogenase	XDH	P47989
MOL000422	kaempferol	TAR00621	Cytochrome P450 3A4	CYP3A4	P08684
MOL000422	kaempferol	TAR00704	Mitogen-activated protein kinase 8	MAPK8	P45983
MOL000422	kaempferol	TAR00724	Cytochrome P450 1A2	CYP1A2	P05177
MOL000422	kaempferol	TAR00733	Glutathione S-transferase P	GSTP1	P09211
MOL000422	kaempferol	TAR02132	Heme oxygenase 1	HMOX1	P09601
MOL000422	kaempferol	TAR02952	Glutathione S-transferase Mu 1	GSTM1	P09488
MOL000422	kaempferol	TAR03204	Aryl hydrocarbon receptor	AHR	P35869
MOL000422	kaempferol	TAR03688	Glutathione S-transferase Mu 2	GSTM2	P28161
MOL000422	kaempferol	TAR03971	Serine/threonine-protein phosphatase 2B catalytic subunit alpha isoform	PPP3CA	Q08209
MOL000422	kaempferol	TAR00006	Prostaglandin G/H synthase 1	PTGS1	P23219
MOL000422	kaempferol	TAR00017	Prothrombin	F2	P00734
MOL000422	kaempferol	TAR00038	Muscarinic acetylcholine receptor M1	CHRM1	P11229
MOL000422	kaempferol	TAR00048	Androgen receptor	AR	P10275
MOL000422	kaempferol	TAR00078	Peroxisome proliferator-activated receptor gamma	PPARG	P37231
MOL000422	kaempferol	TAR00095	Nitric oxide synthase, endothelial	NOS3	P29474
MOL000422	kaempferol	TAR00117	Carbonic anhydrase 2	CA2	P00918
MOL000422	kaempferol	TAR00123	Coagulation factor VII	F7	P08709
MOL000422	kaempferol	TAR00141	Gamma-aminobutyric acid receptor subunit alpha-2	GABRA2	P47869
MOL000422	kaempferol	TAR00165	Acetylcholinesterase	ACHE	P22303
MOL000422	kaempferol	TAR00186	Sodium-dependent noradrenaline transporter	SLC6A2	P23975
MOL000422	kaempferol	TAR00209	Progesterone receptor	PGR	P06401
MOL000422	kaempferol	TAR00210	Muscarinic acetylcholine receptor M2	CHRM2	P08172
MOL000422	kaempferol	TAR00216	Alpha-1B adrenergic receptor	ADRA1B	P35368
MOL000422	kaempferol	TAR00229	Tyrosine-protein phosphatase non-receptor type 1	PTPN1	P18031
MOL000422	kaempferol	TAR00309	Gamma-aminobutyric acid receptor subunit alpha-1	GABRA1	P14867
MOL000422	kaempferol	TAR00332	Dipeptidyl peptidase 4	DPP4	P27487
MOL000422	kaempferol	TAR00402	Mitogen-activated protein kinase 14	MAPK14	Q16539
MOL000422	kaempferol	TAR00422	Glycogen synthase kinase-3 beta	GSK3B	P49841
MOL000422	kaempferol	TAR00482	Cyclin-dependent kinase 2	CDK2	P24941
MOL000422	kaempferol	TAR00491	Phosphatidylinositol 4,5-bisphosphate 3-kinase catalytic subunit gamma isoform	PIK3CG	P48736
MOL000422	kaempferol	TAR00499	Endoribonuclease LACTB2	LACTB2	Q53H82
MOL000422	kaempferol	TAR00647	Serine/threonine-protein kinase Chk1	CHEK1	O14757
MOL000422	kaempferol	TAR00699	cAMP-dependent protein kinase catalytic subunit alpha	PRKACA	P17612
MOL000422	kaempferol	TAR02928	Trypsin-1	PRSS1	P07477
MOL000422	kaempferol	TAR02966	Serine/threonine-protein kinase pim-1	PIM1	P11309
MOL000422	kaempferol	TAR03025	Cyclin-A2	CCNA2	P20248
MOL000422	kaempferol	TAR03276	Nuclear receptor coactivator 2	NCOA2	Q15596
MOL000432	linolenic acid	TAR00710	Hepatocyte nuclear factor 4-alpha	HNF4A	P41235
MOL000432	linolenic acid	TAR00003	Nitric oxide synthase, inducible	NOS2	P35228
MOL000432	linolenic acid	TAR00006	Prostaglandin G/H synthase 1	PTGS1	P23219
MOL000432	linolenic acid	TAR00017	Prothrombin	F2	P00734
MOL000432	linolenic acid	TAR00046	Estrogen receptor	ESR1	P03372
MOL000432	linolenic acid	TAR00078	Peroxisome proliferator-activated receptor gamma	PPARG	P37231
MOL000432	linolenic acid	TAR00094	Prostaglandin G/H synthase 2	PTGS2	P35354
MOL000432	linolenic acid	TAR00095	Nitric oxide synthase, endothelial	NOS3	P29474
MOL000432	linolenic acid	TAR00117	Carbonic anhydrase 2	CA2	P00918
MOL000432	linolenic acid	TAR00158	Retinoic acid receptor RXR-alpha	RXRA	P19793
MOL000432	linolenic acid	TAR00165	Acetylcholinesterase	ACHE	P22303
MOL000432	linolenic acid	TAR00267	Retinoic acid receptor RXR-gamma	RXRG	P48443
MOL000432	linolenic acid	TAR00332	Dipeptidyl peptidase 4	DPP4	P27487
MOL000432	linolenic acid	TAR00404	Transient receptor potential cation channel subfamily V member 1	TRPV1	Q8NER1
MOL000432	linolenic acid	TAR03276	Nuclear receptor coactivator 2	NCOA2	Q15596
MOL000449	Stigmasterol	TAR00003	Nitric oxide synthase, inducible	NOS2	P35228
MOL000449	Stigmasterol	TAR00006	Prostaglandin G/H synthase 1	PTGS1	P23219
MOL000449	Stigmasterol	TAR00016	Muscarinic acetylcholine receptor M3	CHRM3	P20309
MOL000449	Stigmasterol	TAR00017	Prothrombin	F2	P00734
MOL000449	Stigmasterol	TAR00038	Muscarinic acetylcholine receptor M1	CHRM1	P11229
MOL000449	Stigmasterol	TAR00046	Estrogen receptor	ESR1	P03372
MOL000449	Stigmasterol	TAR00048	Androgen receptor	AR	P10275
MOL000449	Stigmasterol	TAR00063	Beta-1 adrenergic receptor	ADRB1	P08588
MOL000449	Stigmasterol	TAR00070	Sodium channel protein type 5 subunit alpha	SCN5A	Q14524
MOL000449	Stigmasterol	TAR00078	Peroxisome proliferator-activated receptor gamma	PPARG	P37231
MOL000449	Stigmasterol	TAR00094	Prostaglandin G/H synthase 2	PTGS2	P35354
MOL000449	Stigmasterol	TAR00095	Nitric oxide synthase, endothelial	NOS3	P29474
MOL000449	Stigmasterol	TAR00105	Alpha-2A adrenergic receptor	ADRA2A	P08913
MOL000449	Stigmasterol	TAR00117	Carbonic anhydrase 2	CA2	P00918
MOL000449	Stigmasterol	TAR00158	Retinoic acid receptor RXR-alpha	RXRA	P19793
MOL000449	Stigmasterol	TAR00165	Acetylcholinesterase	ACHE	P22303
MOL000449	Stigmasterol	TAR00175	5-hydroxytryptamine receptor 2A	HTR2A	P28223
MOL000449	Stigmasterol	TAR00186	Sodium-dependent noradrenaline transporter	SLC6A2	P23975
MOL000449	Stigmasterol	TAR00191	Alpha-1A adrenergic receptor	ADRA1A	P35348
MOL000449	Stigmasterol	TAR00200	Gamma-aminobutyric acid receptor subunit alpha-3	GABRA3	P34903
MOL000449	Stigmasterol	TAR00209	Progesterone receptor	PGR	P06401
MOL000449	Stigmasterol	TAR00210	Muscarinic acetylcholine receptor M2	CHRM2	P08172
MOL000449	Stigmasterol	TAR00216	Alpha-1B adrenergic receptor	ADRA1B	P35368
MOL000449	Stigmasterol	TAR00239	Sodium-dependent dopamine transporter	SLC6A3	Q01959
MOL000449	Stigmasterol	TAR00252	Mineralocorticoid receptor	NR3C2	P08235
MOL000449	Stigmasterol	TAR00261	Beta-2 adrenergic receptor	ADRB2	P07550
MOL000449	Stigmasterol	TAR00288	Aldose reductase	AKR1B1	P15121
MOL000449	Stigmasterol	TAR00308	Glucocorticoid receptor	NR3C1	P04150
MOL000449	Stigmasterol	TAR00309	Gamma-aminobutyric acid receptor subunit alpha-1	GABRA1	P14867
MOL000449	Stigmasterol	TAR00332	Dipeptidyl peptidase 4	DPP4	P27487
MOL000449	Stigmasterol	TAR00346	Urokinase-type plasminogen activator	PLAU	P00749
MOL000449	Stigmasterol	TAR00482	Cyclin-dependent kinase 2	CDK2	P24941
MOL000449	Stigmasterol	TAR00499	Endoribonuclease LACTB2	LACTB2	Q53H82
MOL000449	Stigmasterol	TAR00521	Leukotriene A-4 hydrolase	LTA4H	P09960
MOL000449	Stigmasterol	TAR00565	Amine oxidase [flavin-containing] B	MAOB	P27338
MOL000449	Stigmasterol	TAR00566	Amine oxidase [flavin-containing] A	MAOA	P21397
MOL000449	Stigmasterol	TAR00581	Neuronal acetylcholine receptor subunit alpha-7	CHRNA7	P36544
MOL000449	Stigmasterol	TAR00699	cAMP-dependent protein kinase catalytic subunit alpha	PRKACA	P17612
MOL000449	Stigmasterol	TAR00727	Alcohol dehydrogenase 1C	ADH1C	P00326
MOL000449	Stigmasterol	TAR01201	Immunoglobulin heavy constant gamma 1	IGHG1	P01857
MOL000449	Stigmasterol	TAR01696	Chymotrypsinogen B	CTRB1	P17538
MOL000449	Stigmasterol	TAR02928	Trypsin-1	PRSS1	P07477
MOL000449	Stigmasterol	TAR03276	Nuclear receptor coactivator 2	NCOA2	Q15596
MOL000449	Stigmasterol	TAR03279	Nuclear receptor coactivator 1	NCOA1	Q15788
MOL000561	Astragalin	TAR00003	Nitric oxide synthase, inducible	NOS2	P35228
MOL000561	Astragalin	TAR00006	Prostaglandin G/H synthase 1	PTGS1	P23219
MOL000561	Astragalin	TAR00017	Prothrombin	F2	P00734
MOL000561	Astragalin	TAR00037	Potassium voltage-gated channel subfamily H member 2	KCNH2	Q12809
MOL000561	Astragalin	TAR00046	Estrogen receptor	ESR1	P03372
MOL000561	Astragalin	TAR00048	Androgen receptor	AR	P10275
MOL000561	Astragalin	TAR00078	Peroxisome proliferator-activated receptor gamma	PPARG	P37231
MOL000561	Astragalin	TAR00079	Coagulation factor X	F10	P00742
MOL000561	Astragalin	TAR00094	Prostaglandin G/H synthase 2	PTGS2	P35354
MOL000561	Astragalin	TAR00117	Carbonic anhydrase 2	CA2	P00918
MOL000561	Astragalin	TAR00123	Coagulation factor VII	F7	P08709
MOL000561	Astragalin	TAR00139	Vascular endothelial growth factor receptor 1	FLT1	P17948
MOL000561	Astragalin	TAR00229	Tyrosine-protein phosphatase non-receptor type 1	PTPN1	P18031
MOL000561	Astragalin	TAR00307	Estrogen receptor beta	ESR2	Q92731
MOL000561	Astragalin	TAR00332	Dipeptidyl peptidase 4	DPP4	P27487
MOL000561	Astragalin	TAR00402	Mitogen-activated protein kinase 14	MAPK14	Q16539
MOL000561	Astragalin	TAR00422	Glycogen synthase kinase-3 beta	GSK3B	P49841
MOL000561	Astragalin	TAR00482	Cyclin-dependent kinase 2	CDK2	P24941
MOL000561	Astragalin	TAR00491	Phosphatidylinositol 4,5-bisphosphate 3-kinase catalytic subunit gamma isoform	PIK3CG	P48736
MOL000561	Astragalin	TAR00647	Serine/threonine-protein kinase Chk1	CHEK1	O14757
MOL000561	Astragalin	TAR00699	cAMP-dependent protein kinase catalytic subunit alpha	PRKACA	P17612
MOL000561	Astragalin	TAR02928	Trypsin-1	PRSS1	P07477
MOL000561	Astragalin	TAR02966	Serine/threonine-protein kinase pim-1	PIM1	P11309
MOL000561	Astragalin	TAR03025	Cyclin-A2	CCNA2	P20248
MOL000561	Astragalin	TAR03276	Nuclear receptor coactivator 2	NCOA2	Q15596
MOL000608	()-Terpinen-4-ol	TAR00016	Muscarinic acetylcholine receptor M3	CHRM3	P20309
MOL000608	()-Terpinen-4-ol	TAR00017	Prothrombin	F2	P00734
MOL000608	()-Terpinen-4-ol	TAR00038	Muscarinic acetylcholine receptor M1	CHRM1	P11229
MOL000608	()-Terpinen-4-ol	TAR00141	Gamma-aminobutyric acid receptor subunit alpha-2	GABRA2	P47869
MOL000608	()-Terpinen-4-ol	TAR00165	Acetylcholinesterase	ACHE	P22303
MOL000608	()-Terpinen-4-ol	TAR00181	Gamma-aminobutyric acid receptor subunit alpha-5	GABRA5	P31644
MOL000608	()-Terpinen-4-ol	TAR00186	Sodium-dependent noradrenaline transporter	SLC6A2	P23975
MOL000608	()-Terpinen-4-ol	TAR00200	Gamma-aminobutyric acid receptor subunit alpha-3	GABRA3	P34903
MOL000608	()-Terpinen-4-ol	TAR00210	Muscarinic acetylcholine receptor M2	CHRM2	P08172
MOL000608	()-Terpinen-4-ol	TAR00216	Alpha-1B adrenergic receptor	ADRA1B	P35368
MOL000608	()-Terpinen-4-ol	TAR00284	Neuronal acetylcholine receptor subunit alpha-2	CHRNA2	Q15822
MOL000608	()-Terpinen-4-ol	TAR00309	Gamma-aminobutyric acid receptor subunit alpha-1	GABRA1	P14867
MOL000608	()-Terpinen-4-ol	TAR00332	Dipeptidyl peptidase 4	DPP4	P27487
MOL000608	()-Terpinen-4-ol	TAR01201	Immunoglobulin heavy constant gamma 1	IGHG1	P01857
MOL000608	()-Terpinen-4-ol	TAR02928	Trypsin-1	PRSS1	P07477
MOL000608	()-Terpinen-4-ol	TAR03284	Gamma-aminobutyric acid receptor subunit alpha-6	GABRA6	Q16445
MOL000612	(-)-alpha-cedrene	TAR00016	Muscarinic acetylcholine receptor M3	CHRM3	P20309
MOL000612	(-)-alpha-cedrene	TAR00017	Prothrombin	F2	P00734
MOL000612	(-)-alpha-cedrene	TAR00038	Muscarinic acetylcholine receptor M1	CHRM1	P11229
MOL000612	(-)-alpha-cedrene	TAR00046	Estrogen receptor	ESR1	P03372
MOL000612	(-)-alpha-cedrene	TAR00094	Prostaglandin G/H synthase 2	PTGS2	P35354
MOL000612	(-)-alpha-cedrene	TAR00117	Carbonic anhydrase 2	CA2	P00918
MOL000612	(-)-alpha-cedrene	TAR00141	Gamma-aminobutyric acid receptor subunit alpha-2	GABRA2	P47869
MOL000612	(-)-alpha-cedrene	TAR00158	Retinoic acid receptor RXR-alpha	RXRA	P19793
MOL000612	(-)-alpha-cedrene	TAR00165	Acetylcholinesterase	ACHE	P22303
MOL000612	(-)-alpha-cedrene	TAR00309	Gamma-aminobutyric acid receptor subunit alpha-1	GABRA1	P14867
MOL000612	(-)-alpha-cedrene	TAR00332	Dipeptidyl peptidase 4	DPP4	P27487
MOL000612	(-)-alpha-cedrene	TAR00499	Endoribonuclease LACTB2	LACTB2	Q53H82
MOL000612	(-)-alpha-cedrene	TAR00726	Alcohol dehydrogenase 1B	ADH1B	P00325
MOL000612	(-)-alpha-cedrene	TAR00727	Alcohol dehydrogenase 1C	ADH1C	P00326
MOL000612	(-)-alpha-cedrene	TAR03276	Nuclear receptor coactivator 2	NCOA2	Q15596
MOL000675	oleic acid	TAR00003	Nitric oxide synthase, inducible	NOS2	P35228
MOL000675	oleic acid	TAR00076	Plasminogen	PLG	P00747
MOL000675	oleic acid	TAR00083	Lipoprotein lipase	LPL	P06858
MOL000675	oleic acid	TAR00346	Urokinase-type plasminogen activator	PLAU	P00749
MOL000675	oleic acid	TAR00357	Serum paraoxonase/arylesterase 1	PON1	P27169
MOL000675	oleic acid	TAR00428	Myeloperoxidase	MPO	P05164
MOL000675	oleic acid	TAR00578	Glutamyl aminopeptidase	ENPEP	Q07075
MOL000675	oleic acid	TAR00597	Superoxide dismutase [Cu-Zn]	SOD1	P00441
MOL000675	oleic acid	TAR00735	Catalase	CAT	P04040
MOL000675	oleic acid	TAR00768	BDNF/NT-3 growth factors receptor	NTRK2	Q16620
MOL000675	oleic acid	TAR01644	3-hydroxy-3-methylglutaryl-coenzyme A reductase	HMGCR	P04035
MOL000675	oleic acid	TAR02882	Insulin [Cleaved into: Insulin B chain; Insulin A chain]	INS	P01308
MOL000675	oleic acid	TAR02928	Trypsin-1	PRSS1	P07477
MOL000675	oleic acid	TAR03018	Peptidyl-glycine alpha-amidating monooxygenase	PAM	P19021
MOL000675	oleic acid	TAR03202	Sterol O-acyltransferase 1	SOAT1	P35610
MOL000675	oleic acid	TAR03754	Aspartyl aminopeptidase	DNPEP	Q9ULA0
MOL000675	oleic acid	TAR00006	Prostaglandin G/H synthase 1	PTGS1	P23219
MOL000675	oleic acid	TAR00017	Prothrombin	F2	P00734
MOL000675	oleic acid	TAR00078	Peroxisome proliferator-activated receptor gamma	PPARG	P37231
MOL000675	oleic acid	TAR00094	Prostaglandin G/H synthase 2	PTGS2	P35354
MOL000675	oleic acid	TAR00095	Nitric oxide synthase, endothelial	NOS3	P29474
MOL000675	oleic acid	TAR00117	Carbonic anhydrase 2	CA2	P00918
MOL000675	oleic acid	TAR00158	Retinoic acid receptor RXR-alpha	RXRA	P19793
MOL000675	oleic acid	TAR00165	Acetylcholinesterase	ACHE	P22303
MOL000675	oleic acid	TAR00332	Dipeptidyl peptidase 4	DPP4	P27487
MOL000675	oleic acid	TAR00482	Cyclin-dependent kinase 2	CDK2	P24941
MOL000675	oleic acid	TAR00726	Alcohol dehydrogenase 1B	ADH1B	P00325
MOL000675	oleic acid	TAR00727	Alcohol dehydrogenase 1C	ADH1C	P00326
MOL000675	oleic acid	TAR00729	Alcohol dehydrogenase 1A	ADH1A	P07327
MOL000675	oleic acid	TAR01172	Lysozyme C	LYZ	P61626
MOL000675	oleic acid	TAR03276	Nuclear receptor coactivator 2	NCOA2	Q15596
MOL000675	oleic acid	TAR03952	Trypsin-3	PRSS3	P35030
MOL000714	Hyacinthin	TAR00117	Carbonic anhydrase 2	CA2	P00918
MOL000714	Hyacinthin	TAR00726	Alcohol dehydrogenase 1B	ADH1B	P00325
MOL000714	Hyacinthin	TAR00727	Alcohol dehydrogenase 1C	ADH1C	P00326
MOL000714	Hyacinthin	TAR00729	Alcohol dehydrogenase 1A	ADH1A	P07327
MOL000714	Hyacinthin	TAR02928	Trypsin-1	PRSS1	P07477
MOL000714	Hyacinthin	TAR03952	Trypsin-3	PRSS3	P35030
MOL000748	HMF	TAR00006	Prostaglandin G/H synthase 1	PTGS1	P23219
MOL000748	HMF	TAR00016	Muscarinic acetylcholine receptor M3	CHRM3	P20309
MOL000748	HMF	TAR00017	Prothrombin	F2	P00734
MOL000748	HMF	TAR00038	Muscarinic acetylcholine receptor M1	CHRM1	P11229
MOL000748	HMF	TAR00094	Prostaglandin G/H synthase 2	PTGS2	P35354
MOL000748	HMF	TAR00095	Nitric oxide synthase, endothelial	NOS3	P29474
MOL000748	HMF	TAR00117	Carbonic anhydrase 2	CA2	P00918
MOL000748	HMF	TAR00141	Gamma-aminobutyric acid receptor subunit alpha-2	GABRA2	P47869
MOL000748	HMF	TAR00165	Acetylcholinesterase	ACHE	P22303
MOL000748	HMF	TAR00181	Gamma-aminobutyric acid receptor subunit alpha-5	GABRA5	P31644
MOL000748	HMF	TAR00200	Gamma-aminobutyric acid receptor subunit alpha-3	GABRA3	P34903
MOL000748	HMF	TAR00210	Muscarinic acetylcholine receptor M2	CHRM2	P08172
MOL000748	HMF	TAR00309	Gamma-aminobutyric acid receptor subunit alpha-1	GABRA1	P14867
MOL000748	HMF	TAR00332	Dipeptidyl peptidase 4	DPP4	P27487
MOL000748	HMF	TAR00499	Endoribonuclease LACTB2	LACTB2	Q53H82
MOL000748	HMF	TAR00726	Alcohol dehydrogenase 1B	ADH1B	P00325
MOL000748	HMF	TAR00727	Alcohol dehydrogenase 1C	ADH1C	P00326
MOL000748	HMF	TAR01172	Lysozyme C	LYZ	P61626
MOL000748	HMF	TAR01201	Immunoglobulin heavy constant gamma 1	IGHG1	P01857
MOL000748	HMF	TAR02928	Trypsin-1	PRSS1	P07477
MOL000748	HMF	TAR03216	Glutamate receptor 2	GRIA2	P42262
MOL000748	HMF	TAR03284	Gamma-aminobutyric acid receptor subunit alpha-6	GABRA6	Q16445
MOL000953	CLR	TAR00046	Estrogen receptor	ESR1	P03372
MOL000953	CLR	TAR00048	Androgen receptor	AR	P10275
MOL000953	CLR	TAR00209	Progesterone receptor	PGR	P06401
MOL000953	CLR	TAR00252	Mineralocorticoid receptor	NR3C2	P08235
MOL000953	CLR	TAR00308	Glucocorticoid receptor	NR3C1	P04150
MOL000953	CLR	TAR00332	Dipeptidyl peptidase 4	DPP4	P27487
MOL000953	CLR	TAR02928	Trypsin-1	PRSS1	P07477
MOL000953	CLR	TAR03276	Nuclear receptor coactivator 2	NCOA2	Q15596
MOL001129	l-Verbenone	TAR00016	Muscarinic acetylcholine receptor M3	CHRM3	P20309
MOL001129	l-Verbenone	TAR00046	Estrogen receptor	ESR1	P03372
MOL001129	l-Verbenone	TAR00048	Androgen receptor	AR	P10275
MOL001129	l-Verbenone	TAR00141	Gamma-aminobutyric acid receptor subunit alpha-2	GABRA2	P47869
MOL001129	l-Verbenone	TAR00165	Acetylcholinesterase	ACHE	P22303
MOL001129	l-Verbenone	TAR00181	Gamma-aminobutyric acid receptor subunit alpha-5	GABRA5	P31644
MOL001129	l-Verbenone	TAR00209	Progesterone receptor	PGR	P06401
MOL001129	l-Verbenone	TAR00210	Muscarinic acetylcholine receptor M2	CHRM2	P08172
MOL001129	l-Verbenone	TAR00252	Mineralocorticoid receptor	NR3C2	P08235
MOL001129	l-Verbenone	TAR00308	Glucocorticoid receptor	NR3C1	P04150
MOL001129	l-Verbenone	TAR00309	Gamma-aminobutyric acid receptor subunit alpha-1	GABRA1	P14867
MOL001129	l-Verbenone	TAR02928	Trypsin-1	PRSS1	P07477
MOL001387	(7aS)-4,4,7a-trimethyl-6,7-dihydro-5H-benzofuran-2-one	TAR00141	Gamma-aminobutyric acid receptor subunit alpha-2	GABRA2	P47869
MOL001387	(7aS)-4,4,7a-trimethyl-6,7-dihydro-5H-benzofuran-2-one	TAR00181	Gamma-aminobutyric acid receptor subunit alpha-5	GABRA5	P31644
MOL001387	(7aS)-4,4,7a-trimethyl-6,7-dihydro-5H-benzofuran-2-one	TAR00200	Gamma-aminobutyric acid receptor subunit alpha-3	GABRA3	P34903
MOL001387	(7aS)-4,4,7a-trimethyl-6,7-dihydro-5H-benzofuran-2-one	TAR00309	Gamma-aminobutyric acid receptor subunit alpha-1	GABRA1	P14867
MOL001387	(7aS)-4,4,7a-trimethyl-6,7-dihydro-5H-benzofuran-2-one	TAR00581	Neuronal acetylcholine receptor subunit alpha-7	CHRNA7	P36544
MOL001387	(7aS)-4,4,7a-trimethyl-6,7-dihydro-5H-benzofuran-2-one	TAR02928	Trypsin-1	PRSS1	P07477
MOL001387	(7aS)-4,4,7a-trimethyl-6,7-dihydro-5H-benzofuran-2-one	TAR03284	Gamma-aminobutyric acid receptor subunit alpha-6	GABRA6	Q16445
MOL000223	caffeic acid	TAR00006	Prostaglandin G/H synthase 1	PTGS1	P23219
MOL000223	caffeic acid	TAR00094	Prostaglandin G/H synthase 2	PTGS2	P35354
MOL000223	caffeic acid	TAR00165	Acetylcholinesterase	ACHE	P22303
MOL000223	caffeic acid	TAR00265	Tumor necrosis factor	TNF	P01375
MOL000223	caffeic acid	TAR00462	P-selectin	SELP	P16109
MOL000223	caffeic acid	TAR00488	Tyrosine-protein kinase BTK	BTK	Q06187
MOL000223	caffeic acid	TAR03828	Ras-related C3 botulinum toxin substrate 1	RAC1	P63000
MOL000223	caffeic acid	TAR00003	Nitric oxide synthase, inducible	NOS2	P35228
MOL000223	caffeic acid	TAR00017	Prothrombin	F2	P00734
MOL000223	caffeic acid	TAR00063	Beta-1 adrenergic receptor	ADRB1	P08588
MOL000223	caffeic acid	TAR00095	Nitric oxide synthase, endothelial	NOS3	P29474
MOL000223	caffeic acid	TAR00105	Alpha-2A adrenergic receptor	ADRA2A	P08913
MOL000223	caffeic acid	TAR00117	Carbonic anhydrase 2	CA2	P00918
MOL000223	caffeic acid	TAR00126	Alpha-2C adrenergic receptor	ADRA2C	P18825
MOL000223	caffeic acid	TAR00191	Alpha-1A adrenergic receptor	ADRA1A	P35348
MOL000223	caffeic acid	TAR00239	Sodium-dependent dopamine transporter	SLC6A3	Q01959
MOL000223	caffeic acid	TAR00261	Beta-2 adrenergic receptor	ADRB2	P07550
MOL000223	caffeic acid	TAR00272	Alpha-1D adrenergic receptor	ADRA1D	P25100
MOL000223	caffeic acid	TAR00288	Aldose reductase	AKR1B1	P15121
MOL000223	caffeic acid	TAR00332	Dipeptidyl peptidase 4	DPP4	P27487
MOL000223	caffeic acid	TAR00346	Urokinase-type plasminogen activator	PLAU	P00749
MOL000223	caffeic acid	TAR00482	Cyclin-dependent kinase 2	CDK2	P24941
MOL000223	caffeic acid	TAR00499	Endoribonuclease LACTB2	LACTB2	Q53H82
MOL000223	caffeic acid	TAR00565	Amine oxidase [flavin-containing] B	MAOB	P27338
MOL000223	caffeic acid	TAR00566	Amine oxidase [flavin-containing] A	MAOA	P21397
MOL000223	caffeic acid	TAR01172	Lysozyme C	LYZ	P61626
MOL000223	caffeic acid	TAR01696	Chymotrypsinogen B	CTRB1	P17538
MOL000223	caffeic acid	TAR02928	Trypsin-1	PRSS1	P07477
MOL001398	Methyllinolenate	TAR00006	Prostaglandin G/H synthase 1	PTGS1	P23219
MOL001398	Methyllinolenate	TAR00017	Prothrombin	F2	P00734
MOL001398	Methyllinolenate	TAR00046	Estrogen receptor	ESR1	P03372
MOL001398	Methyllinolenate	TAR00078	Peroxisome proliferator-activated receptor gamma	PPARG	P37231
MOL001398	Methyllinolenate	TAR00094	Prostaglandin G/H synthase 2	PTGS2	P35354
MOL001398	Methyllinolenate	TAR00095	Nitric oxide synthase, endothelial	NOS3	P29474
MOL001398	Methyllinolenate	TAR00158	Retinoic acid receptor RXR-alpha	RXRA	P19793
MOL001398	Methyllinolenate	TAR00165	Acetylcholinesterase	ACHE	P22303
MOL001398	Methyllinolenate	TAR00186	Sodium-dependent noradrenaline transporter	SLC6A2	P23975
MOL001398	Methyllinolenate	TAR00332	Dipeptidyl peptidase 4	DPP4	P27487
MOL001398	Methyllinolenate	TAR03276	Nuclear receptor coactivator 2	NCOA2	Q15596
MOL001442	phytol	TAR00003	Nitric oxide synthase, inducible	NOS2	P35228
MOL001442	phytol	TAR00016	Muscarinic acetylcholine receptor M3	CHRM3	P20309
MOL001442	phytol	TAR00017	Prothrombin	F2	P00734
MOL001442	phytol	TAR00038	Muscarinic acetylcholine receptor M1	CHRM1	P11229
MOL001442	phytol	TAR00046	Estrogen receptor	ESR1	P03372
MOL001442	phytol	TAR00094	Prostaglandin G/H synthase 2	PTGS2	P35354
MOL001442	phytol	TAR00095	Nitric oxide synthase, endothelial	NOS3	P29474
MOL001442	phytol	TAR00158	Retinoic acid receptor RXR-alpha	RXRA	P19793
MOL001442	phytol	TAR00165	Acetylcholinesterase	ACHE	P22303
MOL001442	phytol	TAR00309	Gamma-aminobutyric acid receptor subunit alpha-1	GABRA1	P14867
MOL001442	phytol	TAR00332	Dipeptidyl peptidase 4	DPP4	P27487
MOL001695	Quercimeritrin (6CI,7CI,8CI)	TAR00117	Carbonic anhydrase 2	CA2	P00918
MOL001771	poriferast-5-en-3beta-ol	TAR00046	Estrogen receptor	ESR1	P03372
MOL001771	poriferast-5-en-3beta-ol	TAR00048	Androgen receptor	AR	P10275
MOL001771	poriferast-5-en-3beta-ol	TAR00209	Progesterone receptor	PGR	P06401
MOL001771	poriferast-5-en-3beta-ol	TAR00308	Glucocorticoid receptor	NR3C1	P04150
MOL001771	poriferast-5-en-3beta-ol	TAR03276	Nuclear receptor coactivator 2	NCOA2	Q15596
MOL001787	ADO	TAR00003	Nitric oxide synthase, inducible	NOS2	P35228
MOL001787	ADO	TAR00006	Prostaglandin G/H synthase 1	PTGS1	P23219
MOL001787	ADO	TAR00017	Prothrombin	F2	P00734
MOL001787	ADO	TAR00046	Estrogen receptor	ESR1	P03372
MOL001787	ADO	TAR00090	Purine nucleoside phosphorylase	PNP	P00491
MOL001787	ADO	TAR00094	Prostaglandin G/H synthase 2	PTGS2	P35354
MOL001787	ADO	TAR00095	Nitric oxide synthase, endothelial	NOS3	P29474
MOL001787	ADO	TAR00229	Tyrosine-protein phosphatase non-receptor type 1	PTPN1	P18031
MOL001787	ADO	TAR00355	Adenosine receptor A2a	ADORA2A	P29274
MOL001787	ADO	TAR00482	Cyclin-dependent kinase 2	CDK2	P24941
MOL001787	ADO	TAR00572	Adenosine deaminase	ADA	P00813
MOL001787	ADO	TAR02966	Serine/threonine-protein kinase pim-1	PIM1	P11309
MOL001787	ADO	TAR03025	Cyclin-A2	CCNA2	P20248
MOL001788	adenine	TAR00090	Purine nucleoside phosphorylase	PNP	P00491
MOL001788	adenine	TAR00482	Cyclin-dependent kinase 2	CDK2	P24941
MOL001801	salicylic acid	TAR00076	Plasminogen	PLG	P00747
MOL001801	salicylic acid	TAR00088	Arachidonate 5-lipoxygenase	ALOX5	P09917
MOL001801	salicylic acid	TAR00194	Thyroid peroxidase	TPO	P07202
MOL001801	salicylic acid	TAR00357	Serum paraoxonase/arylesterase 1	PON1	P27169
MOL001801	salicylic acid	TAR00374	Fatty acid synthase	FASN	P49327
MOL001801	salicylic acid	TAR00597	Superoxide dismutase [Cu-Zn]	SOD1	P00441
MOL001801	salicylic acid	TAR00733	Glutathione S-transferase P	GSTP1	P09211
MOL001801	salicylic acid	TAR00735	Catalase	CAT	P04040
MOL001801	salicylic acid	TAR00755	Pyruvate kinase PKLR	PKLR	P30613
MOL001801	salicylic acid	TAR00761	Prostacyclin synthase	PTGIS	Q16647
MOL001801	salicylic acid	TAR00777	Interferon beta	IFNB1	P01574
MOL001801	salicylic acid	TAR01883	Tyrosine aminotransferase	TAT	P17735
MOL001801	salicylic acid	TAR02938	Beta-glucuronidase	GUSB	P08236
MOL001801	salicylic acid	TAR03023	Nuclear factor NF-kappa-B p105 subunit	NFKB1	P19838
MOL001801	salicylic acid	TAR03236	Aldo-keto reductase family 1 member C1	AKR1C1	Q04828
MOL001801	salicylic acid	TAR00006	Prostaglandin G/H synthase 1	PTGS1	P23219
MOL001801	salicylic acid	TAR00017	Prothrombin	F2	P00734
MOL001801	salicylic acid	TAR00094	Prostaglandin G/H synthase 2	PTGS2	P35354
MOL001801	salicylic acid	TAR00117	Carbonic anhydrase 2	CA2	P00918
MOL001801	salicylic acid	TAR00165	Acetylcholinesterase	ACHE	P22303
MOL001801	salicylic acid	TAR00482	Cyclin-dependent kinase 2	CDK2	P24941
MOL001801	salicylic acid	TAR00499	Endoribonuclease LACTB2	LACTB2	Q53H82
MOL001801	salicylic acid	TAR00565	Amine oxidase [flavin-containing] B	MAOB	P27338
MOL001801	salicylic acid	TAR00726	Alcohol dehydrogenase 1B	ADH1B	P00325
MOL001801	salicylic acid	TAR00727	Alcohol dehydrogenase 1C	ADH1C	P00326
MOL001801	salicylic acid	TAR00729	Alcohol dehydrogenase 1A	ADH1A	P07327
MOL001801	salicylic acid	TAR01172	Lysozyme C	LYZ	P61626
MOL001801	salicylic acid	TAR01696	Chymotrypsinogen B	CTRB1	P17538
MOL001801	salicylic acid	TAR02928	Trypsin-1	PRSS1	P07477
MOL001801	salicylic acid	TAR03952	Trypsin-3	PRSS3	P35030
MOL001955	Heriguard	TAR00046	Estrogen receptor	ESR1	P03372
MOL001955	Heriguard	TAR00117	Carbonic anhydrase 2	CA2	P00918
MOL001955	Heriguard	TAR00332	Dipeptidyl peptidase 4	DPP4	P27487
MOL001955	Heriguard	TAR00422	Glycogen synthase kinase-3 beta	GSK3B	P49841
MOL001955	Heriguard	TAR00499	Endoribonuclease LACTB2	LACTB2	Q53H82
MOL001955	Heriguard	TAR02928	Trypsin-1	PRSS1	P07477
MOL002003	(-)-Caryophyllene oxide	TAR00016	Muscarinic acetylcholine receptor M3	CHRM3	P20309
MOL002003	(-)-Caryophyllene oxide	TAR00017	Prothrombin	F2	P00734
MOL002003	(-)-Caryophyllene oxide	TAR00038	Muscarinic acetylcholine receptor M1	CHRM1	P11229
MOL002003	(-)-Caryophyllene oxide	TAR00094	Prostaglandin G/H synthase 2	PTGS2	P35354
MOL002003	(-)-Caryophyllene oxide	TAR00165	Acetylcholinesterase	ACHE	P22303
MOL002003	(-)-Caryophyllene oxide	TAR00210	Muscarinic acetylcholine receptor M2	CHRM2	P08172
MOL002003	(-)-Caryophyllene oxide	TAR00216	Alpha-1B adrenergic receptor	ADRA1B	P35368
MOL002003	(-)-Caryophyllene oxide	TAR00309	Gamma-aminobutyric acid receptor subunit alpha-1	GABRA1	P14867
MOL002003	(-)-Caryophyllene oxide	TAR00332	Dipeptidyl peptidase 4	DPP4	P27487
MOL002003	(-)-Caryophyllene oxide	TAR03284	Gamma-aminobutyric acid receptor subunit alpha-6	GABRA6	Q16445
MOL002008	myricetin	TAR00046	Estrogen receptor	ESR1	P03372
MOL002008	myricetin	TAR00094	Prostaglandin G/H synthase 2	PTGS2	P35354
MOL002008	myricetin	TAR00140	Vitamin K-dependent protein C	PROC	P04070
MOL002008	myricetin	TAR00228	Tyrosine 3-monooxygenase	TH	P07101
MOL002008	myricetin	TAR00238	72 kDa type IV collagenase	MMP2	P08253
MOL002008	myricetin	TAR00265	Tumor necrosis factor	TNF	P01375
MOL002008	myricetin	TAR00351	Interleukin-6	IL6	P05231
MOL002008	myricetin	TAR00414	Transcription factor AP-1	JUN	P05412
MOL002008	myricetin	TAR00418	Interleukin-1 beta	IL1B	P01584
MOL002008	myricetin	TAR00568	Xanthine dehydrogenase/oxidase [Includes: Xanthine dehydrogenase	XDH	P47989
MOL002008	myricetin	TAR01293	DNA topoisomerase 1	TOP1	P11387
MOL002008	myricetin	TAR03201	Phosphoenolpyruvate carboxykinase, cytosolic [GTP]	PCK1	P35558
MOL002008	myricetin	TAR00003	Nitric oxide synthase, inducible	NOS2	P35228
MOL002008	myricetin	TAR00006	Prostaglandin G/H synthase 1	PTGS1	P23219
MOL002008	myricetin	TAR00048	Androgen receptor	AR	P10275
MOL002008	myricetin	TAR00078	Peroxisome proliferator-activated receptor gamma	PPARG	P37231
MOL002008	myricetin	TAR00117	Carbonic anhydrase 2	CA2	P00918
MOL002008	myricetin	TAR00229	Tyrosine-protein phosphatase non-receptor type 1	PTPN1	P18031
MOL002008	myricetin	TAR00288	Aldose reductase	AKR1B1	P15121
MOL002008	myricetin	TAR00307	Estrogen receptor beta	ESR2	Q92731
MOL002008	myricetin	TAR00332	Dipeptidyl peptidase 4	DPP4	P27487
MOL002008	myricetin	TAR00402	Mitogen-activated protein kinase 14	MAPK14	Q16539
MOL002008	myricetin	TAR00422	Glycogen synthase kinase-3 beta	GSK3B	P49841
MOL002008	myricetin	TAR00482	Cyclin-dependent kinase 2	CDK2	P24941
MOL002008	myricetin	TAR00491	Phosphatidylinositol 4,5-bisphosphate 3-kinase catalytic subunit gamma isoform	PIK3CG	P48736
MOL002008	myricetin	TAR00499	Endoribonuclease LACTB2	LACTB2	Q53H82
MOL002008	myricetin	TAR02966	Serine/threonine-protein kinase pim-1	PIM1	P11309
MOL002008	myricetin	TAR03025	Cyclin-A2	CCNA2	P20248
MOL002008	myricetin	TAR03276	Nuclear receptor coactivator 2	NCOA2	Q15596
MOL002683	Ligla	TAR00003	Nitric oxide synthase, inducible	NOS2	P35228
MOL002683	Ligla	TAR00006	Prostaglandin G/H synthase 1	PTGS1	P23219
MOL002683	Ligla	TAR00017	Prothrombin	F2	P00734
MOL002683	Ligla	TAR00046	Estrogen receptor	ESR1	P03372
MOL002683	Ligla	TAR00078	Peroxisome proliferator-activated receptor gamma	PPARG	P37231
MOL002683	Ligla	TAR00094	Prostaglandin G/H synthase 2	PTGS2	P35354
MOL002683	Ligla	TAR00095	Nitric oxide synthase, endothelial	NOS3	P29474
MOL002683	Ligla	TAR00158	Retinoic acid receptor RXR-alpha	RXRA	P19793
MOL002683	Ligla	TAR00165	Acetylcholinesterase	ACHE	P22303
MOL002683	Ligla	TAR00186	Sodium-dependent noradrenaline transporter	SLC6A2	P23975
MOL002683	Ligla	TAR00210	Muscarinic acetylcholine receptor M2	CHRM2	P08172
MOL002683	Ligla	TAR00267	Retinoic acid receptor RXR-gamma	RXRG	P48443
MOL002683	Ligla	TAR00332	Dipeptidyl peptidase 4	DPP4	P27487
MOL002684	gamma-Tocotrienol	TAR00017	Prothrombin	F2	P00734
MOL002684	gamma-Tocotrienol	TAR00046	Estrogen receptor	ESR1	P03372
MOL002684	gamma-Tocotrienol	TAR00048	Androgen receptor	AR	P10275
MOL002684	gamma-Tocotrienol	TAR00094	Prostaglandin G/H synthase 2	PTGS2	P35354
MOL002684	gamma-Tocotrienol	TAR00117	Carbonic anhydrase 2	CA2	P00918
MOL002684	gamma-Tocotrienol	TAR02928	Trypsin-1	PRSS1	P07477
MOL002684	gamma-Tocotrienol	TAR03276	Nuclear receptor coactivator 2	NCOA2	Q15596
MOL002692	Amoenin A3	TAR00079	Coagulation factor X	F10	P00742
MOL002692	Amoenin A3	TAR00094	Prostaglandin G/H synthase 2	PTGS2	P35354
MOL002692	Amoenin A3	TAR00117	Carbonic anhydrase 2	CA2	P00918
MOL002692	Amoenin A3	TAR00229	Tyrosine-protein phosphatase non-receptor type 1	PTPN1	P18031
MOL002692	Amoenin A3	TAR02966	Serine/threonine-protein kinase pim-1	PIM1	P11309
MOL002693	nicotiflorin	TAR00597	Superoxide dismutase [Cu-Zn]	SOD1	P00441
MOL002694	4-[(E)-4-(3,5-dimethoxy-4-oxo-1-cyclohexa-2,5-dienylidene)but-2-enylidene]-2,6-dimethoxycyclohexa-2,5-dien-1-one	TAR00003	Nitric oxide synthase, inducible	NOS2	P35228
MOL002694	4-[(E)-4-(3,5-dimethoxy-4-oxo-1-cyclohexa-2,5-dienylidene)but-2-enylidene]-2,6-dimethoxycyclohexa-2,5-dien-1-one	TAR00017	Prothrombin	F2	P00734
MOL002694	4-[(E)-4-(3,5-dimethoxy-4-oxo-1-cyclohexa-2,5-dienylidene)but-2-enylidene]-2,6-dimethoxycyclohexa-2,5-dien-1-one	TAR00046	Estrogen receptor	ESR1	P03372
MOL002694	4-[(E)-4-(3,5-dimethoxy-4-oxo-1-cyclohexa-2,5-dienylidene)but-2-enylidene]-2,6-dimethoxycyclohexa-2,5-dien-1-one	TAR00048	Androgen receptor	AR	P10275
MOL002694	4-[(E)-4-(3,5-dimethoxy-4-oxo-1-cyclohexa-2,5-dienylidene)but-2-enylidene]-2,6-dimethoxycyclohexa-2,5-dien-1-one	TAR00094	Prostaglandin G/H synthase 2	PTGS2	P35354
MOL002694	4-[(E)-4-(3,5-dimethoxy-4-oxo-1-cyclohexa-2,5-dienylidene)but-2-enylidene]-2,6-dimethoxycyclohexa-2,5-dien-1-one	TAR00095	Nitric oxide synthase, endothelial	NOS3	P29474
MOL002694	4-[(E)-4-(3,5-dimethoxy-4-oxo-1-cyclohexa-2,5-dienylidene)but-2-enylidene]-2,6-dimethoxycyclohexa-2,5-dien-1-one	TAR00117	Carbonic anhydrase 2	CA2	P00918
MOL002694	4-[(E)-4-(3,5-dimethoxy-4-oxo-1-cyclohexa-2,5-dienylidene)but-2-enylidene]-2,6-dimethoxycyclohexa-2,5-dien-1-one	TAR03276	Nuclear receptor coactivator 2	NCOA2	Q15596
MOL002695	lignan	TAR00017	Prothrombin	F2	P00734
MOL002695	lignan	TAR00046	Estrogen receptor	ESR1	P03372
MOL002695	lignan	TAR00048	Androgen receptor	AR	P10275
MOL002695	lignan	TAR00079	Coagulation factor X	F10	P00742
MOL002695	lignan	TAR00094	Prostaglandin G/H synthase 2	PTGS2	P35354
MOL002695	lignan	TAR00117	Carbonic anhydrase 2	CA2	P00918
MOL002695	lignan	TAR02928	Trypsin-1	PRSS1	P07477
MOL002695	lignan	TAR02966	Serine/threonine-protein kinase pim-1	PIM1	P11309
MOL002695	lignan	TAR03276	Nuclear receptor coactivator 2	NCOA2	Q15596
MOL002695	lignan	TAR03727	Calcium-activated potassium channel subunit alpha-1	KCNMA1	Q12791
MOL002697	junipene	TAR00016	Muscarinic acetylcholine receptor M3	CHRM3	P20309
MOL002697	junipene	TAR00017	Prothrombin	F2	P00734
MOL002697	junipene	TAR00046	Estrogen receptor	ESR1	P03372
MOL002697	junipene	TAR00141	Gamma-aminobutyric acid receptor subunit alpha-2	GABRA2	P47869
MOL002697	junipene	TAR00165	Acetylcholinesterase	ACHE	P22303
MOL002697	junipene	TAR00210	Muscarinic acetylcholine receptor M2	CHRM2	P08172
MOL002697	junipene	TAR00216	Alpha-1B adrenergic receptor	ADRA1B	P35368
MOL002697	junipene	TAR00284	Neuronal acetylcholine receptor subunit alpha-2	CHRNA2	Q15822
MOL002697	junipene	TAR00309	Gamma-aminobutyric acid receptor subunit alpha-1	GABRA1	P14867
MOL002697	junipene	TAR00332	Dipeptidyl peptidase 4	DPP4	P27487
MOL002701	neocarthamin	TAR00117	Carbonic anhydrase 2	CA2	P00918
MOL002701	neocarthamin	TAR00229	Tyrosine-protein phosphatase non-receptor type 1	PTPN1	P18031
MOL002704	D-Phenylalanine	TAR00003	Nitric oxide synthase, inducible	NOS2	P35228
MOL002704	D-Phenylalanine	TAR00006	Prostaglandin G/H synthase 1	PTGS1	P23219
MOL002704	D-Phenylalanine	TAR00017	Prothrombin	F2	P00734
MOL002704	D-Phenylalanine	TAR00038	Muscarinic acetylcholine receptor M1	CHRM1	P11229
MOL002704	D-Phenylalanine	TAR00063	Beta-1 adrenergic receptor	ADRB1	P08588
MOL002704	D-Phenylalanine	TAR00094	Prostaglandin G/H synthase 2	PTGS2	P35354
MOL002704	D-Phenylalanine	TAR00095	Nitric oxide synthase, endothelial	NOS3	P29474
MOL002704	D-Phenylalanine	TAR00105	Alpha-2A adrenergic receptor	ADRA2A	P08913
MOL002704	D-Phenylalanine	TAR00117	Carbonic anhydrase 2	CA2	P00918
MOL002704	D-Phenylalanine	TAR00126	Alpha-2C adrenergic receptor	ADRA2C	P18825
MOL002704	D-Phenylalanine	TAR00165	Acetylcholinesterase	ACHE	P22303
MOL002704	D-Phenylalanine	TAR00186	Sodium-dependent noradrenaline transporter	SLC6A2	P23975
MOL002704	D-Phenylalanine	TAR00191	Alpha-1A adrenergic receptor	ADRA1A	P35348
MOL002704	D-Phenylalanine	TAR00216	Alpha-1B adrenergic receptor	ADRA1B	P35368
MOL002704	D-Phenylalanine	TAR00239	Sodium-dependent dopamine transporter	SLC6A3	Q01959
MOL002704	D-Phenylalanine	TAR00261	Beta-2 adrenergic receptor	ADRB2	P07550
MOL002704	D-Phenylalanine	TAR00332	Dipeptidyl peptidase 4	DPP4	P27487
MOL002704	D-Phenylalanine	TAR00499	Endoribonuclease LACTB2	LACTB2	Q53H82
MOL002704	D-Phenylalanine	TAR00565	Amine oxidase [flavin-containing] B	MAOB	P27338
MOL002704	D-Phenylalanine	TAR00566	Amine oxidase [flavin-containing] A	MAOA	P21397
MOL002704	D-Phenylalanine	TAR01172	Lysozyme C	LYZ	P61626
MOL002704	D-Phenylalanine	TAR01696	Chymotrypsinogen B	CTRB1	P17538
MOL002704	D-Phenylalanine	TAR02928	Trypsin-1	PRSS1	P07477
MOL002710	Pyrethrin II	TAR00017	Prothrombin	F2	P00734
MOL002710	Pyrethrin II	TAR00046	Estrogen receptor	ESR1	P03372
MOL002710	Pyrethrin II	TAR00048	Androgen receptor	AR	P10275
MOL002710	Pyrethrin II	TAR00094	Prostaglandin G/H synthase 2	PTGS2	P35354
MOL002710	Pyrethrin II	TAR03276	Nuclear receptor coactivator 2	NCOA2	Q15596
MOL002712	6-Hydroxykaempferol	TAR00003	Nitric oxide synthase, inducible	NOS2	P35228
MOL002712	6-Hydroxykaempferol	TAR00006	Prostaglandin G/H synthase 1	PTGS1	P23219
MOL002712	6-Hydroxykaempferol	TAR00046	Estrogen receptor	ESR1	P03372
MOL002712	6-Hydroxykaempferol	TAR00048	Androgen receptor	AR	P10275
MOL002712	6-Hydroxykaempferol	TAR00078	Peroxisome proliferator-activated receptor gamma	PPARG	P37231
MOL002712	6-Hydroxykaempferol	TAR00094	Prostaglandin G/H synthase 2	PTGS2	P35354
MOL002712	6-Hydroxykaempferol	TAR00117	Carbonic anhydrase 2	CA2	P00918
MOL002712	6-Hydroxykaempferol	TAR00229	Tyrosine-protein phosphatase non-receptor type 1	PTPN1	P18031
MOL002712	6-Hydroxykaempferol	TAR00307	Estrogen receptor beta	ESR2	Q92731
MOL002712	6-Hydroxykaempferol	TAR00332	Dipeptidyl peptidase 4	DPP4	P27487
MOL002712	6-Hydroxykaempferol	TAR00402	Mitogen-activated protein kinase 14	MAPK14	Q16539
MOL002712	6-Hydroxykaempferol	TAR00482	Cyclin-dependent kinase 2	CDK2	P24941
MOL002712	6-Hydroxykaempferol	TAR00491	Phosphatidylinositol 4,5-bisphosphate 3-kinase catalytic subunit gamma isoform	PIK3CG	P48736
MOL002712	6-Hydroxykaempferol	TAR00499	Endoribonuclease LACTB2	LACTB2	Q53H82
MOL002712	6-Hydroxykaempferol	TAR02928	Trypsin-1	PRSS1	P07477
MOL002712	6-Hydroxykaempferol	TAR02966	Serine/threonine-protein kinase pim-1	PIM1	P11309
MOL002712	6-Hydroxykaempferol	TAR03276	Nuclear receptor coactivator 2	NCOA2	Q15596
MOL002714	baicalein	TAR00086	Apoptosis regulator Bcl-2	BCL2	P10415
MOL002714	baicalein	TAR00094	Prostaglandin G/H synthase 2	PTGS2	P35354
MOL002714	baicalein	TAR00428	Myeloperoxidase	MPO	P05164
MOL002714	baicalein	TAR00431	Cyclin-dependent kinase 1	CDK1	P06493
MOL002714	baicalein	TAR00646	Cellular tumor antigen p53	TP53	P04637
MOL002714	baicalein	TAR00740	Vascular endothelial growth factor A	VEGFA	P15692
MOL002714	baicalein	TAR03204	Aryl hydrocarbon receptor	AHR	P35869
MOL002714	baicalein	TAR03433	Egl nine homolog 1	EGLN1	Q9GZT9
MOL002714	baicalein	TAR00003	Nitric oxide synthase, inducible	NOS2	P35228
MOL002714	baicalein	TAR00006	Prostaglandin G/H synthase 1	PTGS1	P23219
MOL002714	baicalein	TAR00046	Estrogen receptor	ESR1	P03372
MOL002714	baicalein	TAR00048	Androgen receptor	AR	P10275
MOL002714	baicalein	TAR00078	Peroxisome proliferator-activated receptor gamma	PPARG	P37231
MOL002714	baicalein	TAR00117	Carbonic anhydrase 2	CA2	P00918
MOL002714	baicalein	TAR00172	cGMP-inhibited 3',5'-cyclic phosphodiesterase A	PDE3A	Q14432
MOL002714	baicalein	TAR00229	Tyrosine-protein phosphatase non-receptor type 1	PTPN1	P18031
MOL002714	baicalein	TAR00307	Estrogen receptor beta	ESR2	Q92731
MOL002714	baicalein	TAR00332	Dipeptidyl peptidase 4	DPP4	P27487
MOL002714	baicalein	TAR00402	Mitogen-activated protein kinase 14	MAPK14	Q16539
MOL002714	baicalein	TAR00422	Glycogen synthase kinase-3 beta	GSK3B	P49841
MOL002714	baicalein	TAR00482	Cyclin-dependent kinase 2	CDK2	P24941
MOL002714	baicalein	TAR00491	Phosphatidylinositol 4,5-bisphosphate 3-kinase catalytic subunit gamma isoform	PIK3CG	P48736
MOL002714	baicalein	TAR00499	Endoribonuclease LACTB2	LACTB2	Q53H82
MOL002714	baicalein	TAR00647	Serine/threonine-protein kinase Chk1	CHEK1	O14757
MOL002714	baicalein	TAR00699	cAMP-dependent protein kinase catalytic subunit alpha	PRKACA	P17612
MOL002714	baicalein	TAR02928	Trypsin-1	PRSS1	P07477
MOL002714	baicalein	TAR02966	Serine/threonine-protein kinase pim-1	PIM1	P11309
MOL002714	baicalein	TAR03025	Cyclin-A2	CCNA2	P20248
MOL002714	baicalein	TAR03276	Nuclear receptor coactivator 2	NCOA2	Q15596
MOL002714	baicalein	TAR03279	Nuclear receptor coactivator 1	NCOA1	Q15788
MOL002717	qt_carthamone	TAR00003	Nitric oxide synthase, inducible	NOS2	P35228
MOL002717	qt_carthamone	TAR00006	Prostaglandin G/H synthase 1	PTGS1	P23219
MOL002717	qt_carthamone	TAR00017	Prothrombin	F2	P00734
MOL002717	qt_carthamone	TAR00046	Estrogen receptor	ESR1	P03372
MOL002717	qt_carthamone	TAR00048	Androgen receptor	AR	P10275
MOL002717	qt_carthamone	TAR00078	Peroxisome proliferator-activated receptor gamma	PPARG	P37231
MOL002717	qt_carthamone	TAR00094	Prostaglandin G/H synthase 2	PTGS2	P35354
MOL002717	qt_carthamone	TAR00095	Nitric oxide synthase, endothelial	NOS3	P29474
MOL002717	qt_carthamone	TAR00117	Carbonic anhydrase 2	CA2	P00918
MOL002717	qt_carthamone	TAR00229	Tyrosine-protein phosphatase non-receptor type 1	PTPN1	P18031
MOL002717	qt_carthamone	TAR00332	Dipeptidyl peptidase 4	DPP4	P27487
MOL002717	qt_carthamone	TAR00402	Mitogen-activated protein kinase 14	MAPK14	Q16539
MOL002717	qt_carthamone	TAR00482	Cyclin-dependent kinase 2	CDK2	P24941
MOL002717	qt_carthamone	TAR00499	Endoribonuclease LACTB2	LACTB2	Q53H82
MOL002717	qt_carthamone	TAR03025	Cyclin-A2	CCNA2	P20248
MOL002721	quercetagetin	TAR00003	Nitric oxide synthase, inducible	NOS2	P35228
MOL002721	quercetagetin	TAR00046	Estrogen receptor	ESR1	P03372
MOL002721	quercetagetin	TAR00048	Androgen receptor	AR	P10275
MOL002721	quercetagetin	TAR00078	Peroxisome proliferator-activated receptor gamma	PPARG	P37231
MOL002721	quercetagetin	TAR00094	Prostaglandin G/H synthase 2	PTGS2	P35354
MOL002721	quercetagetin	TAR00117	Carbonic anhydrase 2	CA2	P00918
MOL002721	quercetagetin	TAR00229	Tyrosine-protein phosphatase non-receptor type 1	PTPN1	P18031
MOL002721	quercetagetin	TAR00307	Estrogen receptor beta	ESR2	Q92731
MOL002721	quercetagetin	TAR00332	Dipeptidyl peptidase 4	DPP4	P27487
MOL002721	quercetagetin	TAR00402	Mitogen-activated protein kinase 14	MAPK14	Q16539
MOL002721	quercetagetin	TAR00482	Cyclin-dependent kinase 2	CDK2	P24941
MOL002721	quercetagetin	TAR00491	Phosphatidylinositol 4,5-bisphosphate 3-kinase catalytic subunit gamma isoform	PIK3CG	P48736
MOL002721	quercetagetin	TAR00499	Endoribonuclease LACTB2	LACTB2	Q53H82
MOL002721	quercetagetin	TAR02928	Trypsin-1	PRSS1	P07477
MOL002721	quercetagetin	TAR02966	Serine/threonine-protein kinase pim-1	PIM1	P11309
MOL002731	(4S)-4-hydroxy-3,5,5-trimethyl-4-[(E,3R)-3-[(2R,3R,4S,5S,6R)-3,4,5-trihydroxy-6-(hydroxymethyl)tetrahydropyran-2-yl]oxybut-1-enyl]cyclohex-2-en-1-one	TAR00017	Prothrombin	F2	P00734
MOL002731	(4S)-4-hydroxy-3,5,5-trimethyl-4-[(E,3R)-3-[(2R,3R,4S,5S,6R)-3,4,5-trihydroxy-6-(hydroxymethyl)tetrahydropyran-2-yl]oxybut-1-enyl]cyclohex-2-en-1-one	TAR00046	Estrogen receptor	ESR1	P03372
MOL002731	(4S)-4-hydroxy-3,5,5-trimethyl-4-[(E,3R)-3-[(2R,3R,4S,5S,6R)-3,4,5-trihydroxy-6-(hydroxymethyl)tetrahydropyran-2-yl]oxybut-1-enyl]cyclohex-2-en-1-one	TAR00048	Androgen receptor	AR	P10275
MOL002731	(4S)-4-hydroxy-3,5,5-trimethyl-4-[(E,3R)-3-[(2R,3R,4S,5S,6R)-3,4,5-trihydroxy-6-(hydroxymethyl)tetrahydropyran-2-yl]oxybut-1-enyl]cyclohex-2-en-1-one	TAR00117	Carbonic anhydrase 2	CA2	P00918
MOL002731	(4S)-4-hydroxy-3,5,5-trimethyl-4-[(E,3R)-3-[(2R,3R,4S,5S,6R)-3,4,5-trihydroxy-6-(hydroxymethyl)tetrahydropyran-2-yl]oxybut-1-enyl]cyclohex-2-en-1-one	TAR00332	Dipeptidyl peptidase 4	DPP4	P27487
MOL002737	scutellarein	TAR00740	Vascular endothelial growth factor A	VEGFA	P15692
MOL002737	scutellarein	TAR00003	Nitric oxide synthase, inducible	NOS2	P35228
MOL002737	scutellarein	TAR00006	Prostaglandin G/H synthase 1	PTGS1	P23219
MOL002737	scutellarein	TAR00046	Estrogen receptor	ESR1	P03372
MOL002737	scutellarein	TAR00048	Androgen receptor	AR	P10275
MOL002737	scutellarein	TAR00078	Peroxisome proliferator-activated receptor gamma	PPARG	P37231
MOL002737	scutellarein	TAR00094	Prostaglandin G/H synthase 2	PTGS2	P35354
MOL002737	scutellarein	TAR00117	Carbonic anhydrase 2	CA2	P00918
MOL002737	scutellarein	TAR00229	Tyrosine-protein phosphatase non-receptor type 1	PTPN1	P18031
MOL002737	scutellarein	TAR00307	Estrogen receptor beta	ESR2	Q92731
MOL002737	scutellarein	TAR00402	Mitogen-activated protein kinase 14	MAPK14	Q16539
MOL002737	scutellarein	TAR00422	Glycogen synthase kinase-3 beta	GSK3B	P49841
MOL002737	scutellarein	TAR00482	Cyclin-dependent kinase 2	CDK2	P24941
MOL002737	scutellarein	TAR00491	Phosphatidylinositol 4,5-bisphosphate 3-kinase catalytic subunit gamma isoform	PIK3CG	P48736
MOL002737	scutellarein	TAR00699	cAMP-dependent protein kinase catalytic subunit alpha	PRKACA	P17612
MOL002737	scutellarein	TAR02928	Trypsin-1	PRSS1	P07477
MOL002737	scutellarein	TAR02966	Serine/threonine-protein kinase pim-1	PIM1	P11309
MOL002737	scutellarein	TAR03025	Cyclin-A2	CCNA2	P20248
MOL002737	scutellarein	TAR03276	Nuclear receptor coactivator 2	NCOA2	Q15596
MOL002746	L-2-Amino-3-(5-hydroxyindolyl)propionic acid	TAR00003	Nitric oxide synthase, inducible	NOS2	P35228
MOL002746	L-2-Amino-3-(5-hydroxyindolyl)propionic acid	TAR00006	Prostaglandin G/H synthase 1	PTGS1	P23219
MOL002746	L-2-Amino-3-(5-hydroxyindolyl)propionic acid	TAR00017	Prothrombin	F2	P00734
MOL002746	L-2-Amino-3-(5-hydroxyindolyl)propionic acid	TAR00046	Estrogen receptor	ESR1	P03372
MOL002746	L-2-Amino-3-(5-hydroxyindolyl)propionic acid	TAR00078	Peroxisome proliferator-activated receptor gamma	PPARG	P37231
MOL002746	L-2-Amino-3-(5-hydroxyindolyl)propionic acid	TAR00094	Prostaglandin G/H synthase 2	PTGS2	P35354
MOL002746	L-2-Amino-3-(5-hydroxyindolyl)propionic acid	TAR00095	Nitric oxide synthase, endothelial	NOS3	P29474
MOL002746	L-2-Amino-3-(5-hydroxyindolyl)propionic acid	TAR00117	Carbonic anhydrase 2	CA2	P00918
MOL002746	L-2-Amino-3-(5-hydroxyindolyl)propionic acid	TAR00229	Tyrosine-protein phosphatase non-receptor type 1	PTPN1	P18031
MOL002746	L-2-Amino-3-(5-hydroxyindolyl)propionic acid	TAR00332	Dipeptidyl peptidase 4	DPP4	P27487
MOL002746	L-2-Amino-3-(5-hydroxyindolyl)propionic acid	TAR00402	Mitogen-activated protein kinase 14	MAPK14	Q16539
MOL002746	L-2-Amino-3-(5-hydroxyindolyl)propionic acid	TAR00482	Cyclin-dependent kinase 2	CDK2	P24941
MOL002746	L-2-Amino-3-(5-hydroxyindolyl)propionic acid	TAR00499	Endoribonuclease LACTB2	LACTB2	Q53H82
MOL002746	L-2-Amino-3-(5-hydroxyindolyl)propionic acid	TAR00521	Leukotriene A-4 hydrolase	LTA4H	P09960
MOL002746	L-2-Amino-3-(5-hydroxyindolyl)propionic acid	TAR00565	Amine oxidase [flavin-containing] B	MAOB	P27338
MOL002746	L-2-Amino-3-(5-hydroxyindolyl)propionic acid	TAR00699	cAMP-dependent protein kinase catalytic subunit alpha	PRKACA	P17612
MOL002746	L-2-Amino-3-(5-hydroxyindolyl)propionic acid	TAR02966	Serine/threonine-protein kinase pim-1	PIM1	P11309
MOL002746	L-2-Amino-3-(5-hydroxyindolyl)propionic acid	TAR03586	cAMP-dependent protein kinase inhibitor alpha	PKIA	P61925
MOL002753	6-hydroxykaempferol-3-O-glucoside	TAR00229	Tyrosine-protein phosphatase non-receptor type 1	PTPN1	P18031
MOL002753	6-hydroxykaempferol-3-O-glucoside	TAR02966	Serine/threonine-protein kinase pim-1	PIM1	P11309
MOL002757	7,8-dimethyl-1H-pyrimido[5,6-g]quinoxaline-2,4-dione	TAR00003	Nitric oxide synthase, inducible	NOS2	P35228
MOL002757	7,8-dimethyl-1H-pyrimido[5,6-g]quinoxaline-2,4-dione	TAR00006	Prostaglandin G/H synthase 1	PTGS1	P23219
MOL002757	7,8-dimethyl-1H-pyrimido[5,6-g]quinoxaline-2,4-dione	TAR00017	Prothrombin	F2	P00734
MOL002757	7,8-dimethyl-1H-pyrimido[5,6-g]quinoxaline-2,4-dione	TAR00046	Estrogen receptor	ESR1	P03372
MOL002757	7,8-dimethyl-1H-pyrimido[5,6-g]quinoxaline-2,4-dione	TAR00048	Androgen receptor	AR	P10275
MOL002757	7,8-dimethyl-1H-pyrimido[5,6-g]quinoxaline-2,4-dione	TAR00094	Prostaglandin G/H synthase 2	PTGS2	P35354
MOL002757	7,8-dimethyl-1H-pyrimido[5,6-g]quinoxaline-2,4-dione	TAR00117	Carbonic anhydrase 2	CA2	P00918
MOL002757	7,8-dimethyl-1H-pyrimido[5,6-g]quinoxaline-2,4-dione	TAR00229	Tyrosine-protein phosphatase non-receptor type 1	PTPN1	P18031
MOL002757	7,8-dimethyl-1H-pyrimido[5,6-g]quinoxaline-2,4-dione	TAR00309	Gamma-aminobutyric acid receptor subunit alpha-1	GABRA1	P14867
MOL002757	7,8-dimethyl-1H-pyrimido[5,6-g]quinoxaline-2,4-dione	TAR00332	Dipeptidyl peptidase 4	DPP4	P27487
MOL002757	7,8-dimethyl-1H-pyrimido[5,6-g]quinoxaline-2,4-dione	TAR00402	Mitogen-activated protein kinase 14	MAPK14	Q16539
MOL002757	7,8-dimethyl-1H-pyrimido[5,6-g]quinoxaline-2,4-dione	TAR00482	Cyclin-dependent kinase 2	CDK2	P24941
MOL002757	7,8-dimethyl-1H-pyrimido[5,6-g]quinoxaline-2,4-dione	TAR00699	cAMP-dependent protein kinase catalytic subunit alpha	PRKACA	P17612
MOL002757	7,8-dimethyl-1H-pyrimido[5,6-g]quinoxaline-2,4-dione	TAR02966	Serine/threonine-protein kinase pim-1	PIM1	P11309
MOL002757	7,8-dimethyl-1H-pyrimido[5,6-g]quinoxaline-2,4-dione	TAR03025	Cyclin-A2	CCNA2	P20248
MOL002764	MEGxp0_000365	TAR00017	Prothrombin	F2	P00734
MOL002765	N1,N5-(Z)-N10-(E)-tri-p-coumaroylspermidine	TAR00017	Prothrombin	F2	P00734
MOL002771	VIV	TAR00017	Prothrombin	F2	P00734
MOL002771	VIV	TAR00046	Estrogen receptor	ESR1	P03372
MOL002771	VIV	TAR00048	Androgen receptor	AR	P10275
MOL002771	VIV	TAR00094	Prostaglandin G/H synthase 2	PTGS2	P35354
MOL002771	VIV	TAR00165	Acetylcholinesterase	ACHE	P22303
MOL002771	VIV	TAR02928	Trypsin-1	PRSS1	P07477
MOL002773	beta-carotene	TAR00086	Apoptosis regulator Bcl-2	BCL2	P10415
MOL002773	beta-carotene	TAR00094	Prostaglandin G/H synthase 2	PTGS2	P35354
MOL002773	beta-carotene	TAR00238	72 kDa type IV collagenase	MMP2	P08253
MOL002773	beta-carotene	TAR00353	Interstitial collagenase	MMP1	P03956
MOL002773	beta-carotene	TAR00414	Transcription factor AP-1	JUN	P05412
MOL002773	beta-carotene	TAR00436	Gap junction alpha-1 protein	GJA1	P17302
MOL002773	beta-carotene	TAR00466	Tissue factor	F3	P13726
MOL002773	beta-carotene	TAR00621	Cytochrome P450 3A4	CYP3A4	P08684
MOL002773	beta-carotene	TAR00724	Cytochrome P450 1A2	CYP1A2	P05177
MOL002773	beta-carotene	TAR00725	Stromelysin-2	MMP10	P09238
MOL002773	beta-carotene	TAR00740	Vascular endothelial growth factor A	VEGFA	P15692
MOL002773	beta-carotene	TAR02132	Heme oxygenase 1	HMOX1	P09601
MOL002773	beta-carotene	TAR03575	Caspase-7	CASP7	P55210
MOL002775	5,8-dimethyltocol	TAR00017	Prothrombin	F2	P00734
MOL002775	5,8-dimethyltocol	TAR00046	Estrogen receptor	ESR1	P03372
MOL002775	5,8-dimethyltocol	TAR00048	Androgen receptor	AR	P10275
MOL002775	5,8-dimethyltocol	TAR00094	Prostaglandin G/H synthase 2	PTGS2	P35354
MOL002775	5,8-dimethyltocol	TAR02928	Trypsin-1	PRSS1	P07477
MOL002776	Baicalin	TAR00079	Coagulation factor X	F10	P00742
MOL002776	Baicalin	TAR00117	Carbonic anhydrase 2	CA2	P00918
MOL002776	Baicalin	TAR00229	Tyrosine-protein phosphatase non-receptor type 1	PTPN1	P18031
MOL002776	Baicalin	TAR00422	Glycogen synthase kinase-3 beta	GSK3B	P49841
MOL002776	Baicalin	TAR02966	Serine/threonine-protein kinase pim-1	PIM1	P11309
MOL002776	Baicalin	TAR03025	Cyclin-A2	CCNA2	P20248
MOL002778	THZ	TAR01172	Lysozyme C	LYZ	P61626
MOL002783	Cumalic acid	TAR00117	Carbonic anhydrase 2	CA2	P00918
MOL002783	Cumalic acid	TAR00309	Gamma-aminobutyric acid receptor subunit alpha-1	GABRA1	P14867
MOL002783	Cumalic acid	TAR00482	Cyclin-dependent kinase 2	CDK2	P24941
MOL002783	Cumalic acid	TAR00727	Alcohol dehydrogenase 1C	ADH1C	P00326
MOL002783	Cumalic acid	TAR02928	Trypsin-1	PRSS1	P07477
MOL002722	Vomifoliol	TAR00003	Nitric oxide synthase, inducible	NOS2	P35228
MOL002722	Vomifoliol	TAR00017	Prothrombin	F2	P00734
MOL002722	Vomifoliol	TAR00141	Gamma-aminobutyric acid receptor subunit alpha-2	GABRA2	P47869
MOL002722	Vomifoliol	TAR00165	Acetylcholinesterase	ACHE	P22303
MOL002722	Vomifoliol	TAR00200	Gamma-aminobutyric acid receptor subunit alpha-3	GABRA3	P34903
MOL002722	Vomifoliol	TAR00309	Gamma-aminobutyric acid receptor subunit alpha-1	GABRA1	P14867
MOL002722	Vomifoliol	TAR00332	Dipeptidyl peptidase 4	DPP4	P27487
MOL002722	Vomifoliol	TAR00468	Neutrophil collagenase	MMP8	P22894
MOL002722	Vomifoliol	TAR00499	Endoribonuclease LACTB2	LACTB2	Q53H82
MOL002722	Vomifoliol	TAR00581	Neuronal acetylcholine receptor subunit alpha-7	CHRNA7	P36544
MOL002722	Vomifoliol	TAR02928	Trypsin-1	PRSS1	P07477
MOL002722	Vomifoliol	TAR03216	Glutamate receptor 2	GRIA2	P42262
MOL002722	Vomifoliol	TAR03284	Gamma-aminobutyric acid receptor subunit alpha-6	GABRA6	Q16445

## Sheet: Bibo
The details of targets from compounds in Bibo
Molecule ID	Molecule Name	Target ID	Target Protein Name	Gene Symbol	Uniprot ID
MOL000018	(+/-)-Isoborneol	TAR00016	Muscarinic acetylcholine receptor M3	CHRM3	P20309
MOL000018	(+/-)-Isoborneol	TAR00017	Prothrombin	F2	P00734
MOL000018	(+/-)-Isoborneol	TAR00038	Muscarinic acetylcholine receptor M1	CHRM1	P11229
MOL000018	(+/-)-Isoborneol	TAR00046	Estrogen receptor	ESR1	P03372
MOL000018	(+/-)-Isoborneol	TAR00048	Androgen receptor	AR	P10275
MOL000018	(+/-)-Isoborneol	TAR00094	Prostaglandin G/H synthase 2	PTGS2	P35354
MOL000018	(+/-)-Isoborneol	TAR00117	Carbonic anhydrase 2	CA2	P00918
MOL000018	(+/-)-Isoborneol	TAR00141	Gamma-aminobutyric acid receptor subunit alpha-2	GABRA2	P47869
MOL000018	(+/-)-Isoborneol	TAR00165	Acetylcholinesterase	ACHE	P22303
MOL000018	(+/-)-Isoborneol	TAR00181	Gamma-aminobutyric acid receptor subunit alpha-5	GABRA5	P31644
MOL000018	(+/-)-Isoborneol	TAR00186	Sodium-dependent noradrenaline transporter	SLC6A2	P23975
MOL000018	(+/-)-Isoborneol	TAR00191	Alpha-1A adrenergic receptor	ADRA1A	P35348
MOL000018	(+/-)-Isoborneol	TAR00200	Gamma-aminobutyric acid receptor subunit alpha-3	GABRA3	P34903
MOL000018	(+/-)-Isoborneol	TAR00209	Progesterone receptor	PGR	P06401
MOL000018	(+/-)-Isoborneol	TAR00210	Muscarinic acetylcholine receptor M2	CHRM2	P08172
MOL000018	(+/-)-Isoborneol	TAR00309	Gamma-aminobutyric acid receptor subunit alpha-1	GABRA1	P14867
MOL000018	(+/-)-Isoborneol	TAR00332	Dipeptidyl peptidase 4	DPP4	P27487
MOL000018	(+/-)-Isoborneol	TAR02928	Trypsin-1	PRSS1	P07477
MOL000018	(+/-)-Isoborneol	TAR03284	Gamma-aminobutyric acid receptor subunit alpha-6	GABRA6	Q16445
MOL000024	alpha-humulene	TAR00265	Tumor necrosis factor	TNF	P01375
MOL000024	alpha-humulene	TAR00418	Interleukin-1 beta	IL1B	P01584
MOL000024	alpha-humulene	TAR00017	Prothrombin	F2	P00734
MOL000024	alpha-humulene	TAR00094	Prostaglandin G/H synthase 2	PTGS2	P35354
MOL000024	alpha-humulene	TAR00095	Nitric oxide synthase, endothelial	NOS3	P29474
MOL000024	alpha-humulene	TAR00099	Renin	REN	P00797
MOL000024	alpha-humulene	TAR00117	Carbonic anhydrase 2	CA2	P00918
MOL000024	alpha-humulene	TAR00165	Acetylcholinesterase	ACHE	P22303
MOL000024	alpha-humulene	TAR00186	Sodium-dependent noradrenaline transporter	SLC6A2	P23975
MOL000024	alpha-humulene	TAR00309	Gamma-aminobutyric acid receptor subunit alpha-1	GABRA1	P14867
MOL000024	alpha-humulene	TAR00332	Dipeptidyl peptidase 4	DPP4	P27487
MOL000024	alpha-humulene	TAR00726	Alcohol dehydrogenase 1B	ADH1B	P00325
MOL000024	alpha-humulene	TAR00727	Alcohol dehydrogenase 1C	ADH1C	P00326
MOL000024	alpha-humulene	TAR02928	Trypsin-1	PRSS1	P07477
MOL000024	alpha-humulene	TAR03276	Nuclear receptor coactivator 2	NCOA2	Q15596
MOL000122	1,8-cineole	TAR00017	Prothrombin	F2	P00734
MOL000122	1,8-cineole	TAR00094	Prostaglandin G/H synthase 2	PTGS2	P35354
MOL000122	1,8-cineole	TAR00095	Nitric oxide synthase, endothelial	NOS3	P29474
MOL000122	1,8-cineole	TAR00117	Carbonic anhydrase 2	CA2	P00918
MOL000122	1,8-cineole	TAR00141	Gamma-aminobutyric acid receptor subunit alpha-2	GABRA2	P47869
MOL000122	1,8-cineole	TAR00165	Acetylcholinesterase	ACHE	P22303
MOL000122	1,8-cineole	TAR00181	Gamma-aminobutyric acid receptor subunit alpha-5	GABRA5	P31644
MOL000122	1,8-cineole	TAR00200	Gamma-aminobutyric acid receptor subunit alpha-3	GABRA3	P34903
MOL000122	1,8-cineole	TAR00284	Neuronal acetylcholine receptor subunit alpha-2	CHRNA2	Q15822
MOL000122	1,8-cineole	TAR00309	Gamma-aminobutyric acid receptor subunit alpha-1	GABRA1	P14867
MOL000122	1,8-cineole	TAR00332	Dipeptidyl peptidase 4	DPP4	P27487
MOL000122	1,8-cineole	TAR00726	Alcohol dehydrogenase 1B	ADH1B	P00325
MOL000122	1,8-cineole	TAR00727	Alcohol dehydrogenase 1C	ADH1C	P00326
MOL000122	1,8-cineole	TAR02928	Trypsin-1	PRSS1	P07477
MOL000125	(-)-alpha-Pinene	TAR00141	Gamma-aminobutyric acid receptor subunit alpha-2	GABRA2	P47869
MOL000125	(-)-alpha-Pinene	TAR00165	Acetylcholinesterase	ACHE	P22303
MOL000125	(-)-alpha-Pinene	TAR00309	Gamma-aminobutyric acid receptor subunit alpha-1	GABRA1	P14867
MOL000125	(-)-alpha-Pinene	TAR00332	Dipeptidyl peptidase 4	DPP4	P27487
MOL000125	(-)-alpha-Pinene	TAR00422	Glycogen synthase kinase-3 beta	GSK3B	P49841
MOL000125	(-)-alpha-Pinene	TAR02928	Trypsin-1	PRSS1	P07477
MOL000126	(-)-nopinene	TAR00006	Prostaglandin G/H synthase 1	PTGS1	P23219
MOL000126	(-)-nopinene	TAR00016	Muscarinic acetylcholine receptor M3	CHRM3	P20309
MOL000126	(-)-nopinene	TAR00017	Prothrombin	F2	P00734
MOL000126	(-)-nopinene	TAR00038	Muscarinic acetylcholine receptor M1	CHRM1	P11229
MOL000126	(-)-nopinene	TAR00046	Estrogen receptor	ESR1	P03372
MOL000126	(-)-nopinene	TAR00094	Prostaglandin G/H synthase 2	PTGS2	P35354
MOL000126	(-)-nopinene	TAR00117	Carbonic anhydrase 2	CA2	P00918
MOL000126	(-)-nopinene	TAR00126	Alpha-2C adrenergic receptor	ADRA2C	P18825
MOL000126	(-)-nopinene	TAR00141	Gamma-aminobutyric acid receptor subunit alpha-2	GABRA2	P47869
MOL000126	(-)-nopinene	TAR00158	Retinoic acid receptor RXR-alpha	RXRA	P19793
MOL000126	(-)-nopinene	TAR00165	Acetylcholinesterase	ACHE	P22303
MOL000126	(-)-nopinene	TAR00181	Gamma-aminobutyric acid receptor subunit alpha-5	GABRA5	P31644
MOL000126	(-)-nopinene	TAR00186	Sodium-dependent noradrenaline transporter	SLC6A2	P23975
MOL000126	(-)-nopinene	TAR00191	Alpha-1A adrenergic receptor	ADRA1A	P35348
MOL000126	(-)-nopinene	TAR00200	Gamma-aminobutyric acid receptor subunit alpha-3	GABRA3	P34903
MOL000126	(-)-nopinene	TAR00210	Muscarinic acetylcholine receptor M2	CHRM2	P08172
MOL000126	(-)-nopinene	TAR00216	Alpha-1B adrenergic receptor	ADRA1B	P35368
MOL000126	(-)-nopinene	TAR00239	Sodium-dependent dopamine transporter	SLC6A3	Q01959
MOL000126	(-)-nopinene	TAR00284	Neuronal acetylcholine receptor subunit alpha-2	CHRNA2	Q15822
MOL000126	(-)-nopinene	TAR00309	Gamma-aminobutyric acid receptor subunit alpha-1	GABRA1	P14867
MOL000126	(-)-nopinene	TAR00332	Dipeptidyl peptidase 4	DPP4	P27487
MOL000126	(-)-nopinene	TAR00499	Endoribonuclease LACTB2	LACTB2	Q53H82
MOL000126	(-)-nopinene	TAR00566	Amine oxidase [flavin-containing] A	MAOA	P21397
MOL000126	(-)-nopinene	TAR01172	Lysozyme C	LYZ	P61626
MOL000126	(-)-nopinene	TAR02928	Trypsin-1	PRSS1	P07477
MOL000126	(-)-nopinene	TAR03276	Nuclear receptor coactivator 2	NCOA2	Q15596
MOL000126	(-)-nopinene	TAR03284	Gamma-aminobutyric acid receptor subunit alpha-6	GABRA6	Q16445
MOL000202	Moslene	TAR00094	Prostaglandin G/H synthase 2	PTGS2	P35354
MOL000202	Moslene	TAR00095	Nitric oxide synthase, endothelial	NOS3	P29474
MOL000202	Moslene	TAR00165	Acetylcholinesterase	ACHE	P22303
MOL000202	Moslene	TAR00309	Gamma-aminobutyric acid receptor subunit alpha-1	GABRA1	P14867
MOL000202	Moslene	TAR00332	Dipeptidyl peptidase 4	DPP4	P27487
MOL000202	Moslene	TAR00726	Alcohol dehydrogenase 1B	ADH1B	P00325
MOL000202	Moslene	TAR00727	Alcohol dehydrogenase 1C	ADH1C	P00326
MOL000202	Moslene	TAR00729	Alcohol dehydrogenase 1A	ADH1A	P07327
MOL000202	Moslene	TAR02928	Trypsin-1	PRSS1	P07477
MOL000204	-cis-.beta.-Elemene diastereomer	TAR00006	Prostaglandin G/H synthase 1	PTGS1	P23219
MOL000204	-cis-.beta.-Elemene diastereomer	TAR00016	Muscarinic acetylcholine receptor M3	CHRM3	P20309
MOL000204	-cis-.beta.-Elemene diastereomer	TAR00017	Prothrombin	F2	P00734
MOL000204	-cis-.beta.-Elemene diastereomer	TAR00038	Muscarinic acetylcholine receptor M1	CHRM1	P11229
MOL000204	-cis-.beta.-Elemene diastereomer	TAR00046	Estrogen receptor	ESR1	P03372
MOL000204	-cis-.beta.-Elemene diastereomer	TAR00094	Prostaglandin G/H synthase 2	PTGS2	P35354
MOL000204	-cis-.beta.-Elemene diastereomer	TAR00095	Nitric oxide synthase, endothelial	NOS3	P29474
MOL000204	-cis-.beta.-Elemene diastereomer	TAR00117	Carbonic anhydrase 2	CA2	P00918
MOL000204	-cis-.beta.-Elemene diastereomer	TAR00141	Gamma-aminobutyric acid receptor subunit alpha-2	GABRA2	P47869
MOL000204	-cis-.beta.-Elemene diastereomer	TAR00158	Retinoic acid receptor RXR-alpha	RXRA	P19793
MOL000204	-cis-.beta.-Elemene diastereomer	TAR00165	Acetylcholinesterase	ACHE	P22303
MOL000204	-cis-.beta.-Elemene diastereomer	TAR00186	Sodium-dependent noradrenaline transporter	SLC6A2	P23975
MOL000204	-cis-.beta.-Elemene diastereomer	TAR00191	Alpha-1A adrenergic receptor	ADRA1A	P35348
MOL000204	-cis-.beta.-Elemene diastereomer	TAR00200	Gamma-aminobutyric acid receptor subunit alpha-3	GABRA3	P34903
MOL000204	-cis-.beta.-Elemene diastereomer	TAR00210	Muscarinic acetylcholine receptor M2	CHRM2	P08172
MOL000204	-cis-.beta.-Elemene diastereomer	TAR00309	Gamma-aminobutyric acid receptor subunit alpha-1	GABRA1	P14867
MOL000204	-cis-.beta.-Elemene diastereomer	TAR00332	Dipeptidyl peptidase 4	DPP4	P27487
MOL000204	-cis-.beta.-Elemene diastereomer	TAR00581	Neuronal acetylcholine receptor subunit alpha-7	CHRNA7	P36544
MOL000204	-cis-.beta.-Elemene diastereomer	TAR02928	Trypsin-1	PRSS1	P07477
MOL000204	-cis-.beta.-Elemene diastereomer	TAR03276	Nuclear receptor coactivator 2	NCOA2	Q15596
MOL000204	-cis-.beta.-Elemene diastereomer	TAR03284	Gamma-aminobutyric acid receptor subunit alpha-6	GABRA6	Q16445
MOL000206	isoeugenol	TAR03978	Interleukin-2	IL2	P60568
MOL000206	isoeugenol	TAR00003	Nitric oxide synthase, inducible	NOS2	P35228
MOL000206	isoeugenol	TAR00006	Prostaglandin G/H synthase 1	PTGS1	P23219
MOL000206	isoeugenol	TAR00016	Muscarinic acetylcholine receptor M3	CHRM3	P20309
MOL000206	isoeugenol	TAR00017	Prothrombin	F2	P00734
MOL000206	isoeugenol	TAR00038	Muscarinic acetylcholine receptor M1	CHRM1	P11229
MOL000206	isoeugenol	TAR00063	Beta-1 adrenergic receptor	ADRB1	P08588
MOL000206	isoeugenol	TAR00094	Prostaglandin G/H synthase 2	PTGS2	P35354
MOL000206	isoeugenol	TAR00095	Nitric oxide synthase, endothelial	NOS3	P29474
MOL000206	isoeugenol	TAR00105	Alpha-2A adrenergic receptor	ADRA2A	P08913
MOL000206	isoeugenol	TAR00117	Carbonic anhydrase 2	CA2	P00918
MOL000206	isoeugenol	TAR00126	Alpha-2C adrenergic receptor	ADRA2C	P18825
MOL000206	isoeugenol	TAR00165	Acetylcholinesterase	ACHE	P22303
MOL000206	isoeugenol	TAR00186	Sodium-dependent noradrenaline transporter	SLC6A2	P23975
MOL000206	isoeugenol	TAR00191	Alpha-1A adrenergic receptor	ADRA1A	P35348
MOL000206	isoeugenol	TAR00210	Muscarinic acetylcholine receptor M2	CHRM2	P08172
MOL000206	isoeugenol	TAR00216	Alpha-1B adrenergic receptor	ADRA1B	P35368
MOL000206	isoeugenol	TAR00239	Sodium-dependent dopamine transporter	SLC6A3	Q01959
MOL000206	isoeugenol	TAR00261	Beta-2 adrenergic receptor	ADRB2	P07550
MOL000206	isoeugenol	TAR00272	Alpha-1D adrenergic receptor	ADRA1D	P25100
MOL000206	isoeugenol	TAR00332	Dipeptidyl peptidase 4	DPP4	P27487
MOL000206	isoeugenol	TAR00499	Endoribonuclease LACTB2	LACTB2	Q53H82
MOL000206	isoeugenol	TAR00521	Leukotriene A-4 hydrolase	LTA4H	P09960
MOL000206	isoeugenol	TAR00565	Amine oxidase [flavin-containing] B	MAOB	P27338
MOL000206	isoeugenol	TAR00566	Amine oxidase [flavin-containing] A	MAOA	P21397
MOL000206	isoeugenol	TAR01172	Lysozyme C	LYZ	P61626
MOL000206	isoeugenol	TAR02928	Trypsin-1	PRSS1	P07477
MOL000268	(1S,5S)-1-isopropyl-4-methylenebicyclo[3.1.0]hexane	TAR00017	Prothrombin	F2	P00734
MOL000268	(1S,5S)-1-isopropyl-4-methylenebicyclo[3.1.0]hexane	TAR00046	Estrogen receptor	ESR1	P03372
MOL000268	(1S,5S)-1-isopropyl-4-methylenebicyclo[3.1.0]hexane	TAR00048	Androgen receptor	AR	P10275
MOL000268	(1S,5S)-1-isopropyl-4-methylenebicyclo[3.1.0]hexane	TAR00094	Prostaglandin G/H synthase 2	PTGS2	P35354
MOL000268	(1S,5S)-1-isopropyl-4-methylenebicyclo[3.1.0]hexane	TAR00117	Carbonic anhydrase 2	CA2	P00918
MOL000268	(1S,5S)-1-isopropyl-4-methylenebicyclo[3.1.0]hexane	TAR00141	Gamma-aminobutyric acid receptor subunit alpha-2	GABRA2	P47869
MOL000268	(1S,5S)-1-isopropyl-4-methylenebicyclo[3.1.0]hexane	TAR00158	Retinoic acid receptor RXR-alpha	RXRA	P19793
MOL000268	(1S,5S)-1-isopropyl-4-methylenebicyclo[3.1.0]hexane	TAR00165	Acetylcholinesterase	ACHE	P22303
MOL000268	(1S,5S)-1-isopropyl-4-methylenebicyclo[3.1.0]hexane	TAR00209	Progesterone receptor	PGR	P06401
MOL000268	(1S,5S)-1-isopropyl-4-methylenebicyclo[3.1.0]hexane	TAR00308	Glucocorticoid receptor	NR3C1	P04150
MOL000268	(1S,5S)-1-isopropyl-4-methylenebicyclo[3.1.0]hexane	TAR00309	Gamma-aminobutyric acid receptor subunit alpha-1	GABRA1	P14867
MOL000268	(1S,5S)-1-isopropyl-4-methylenebicyclo[3.1.0]hexane	TAR00332	Dipeptidyl peptidase 4	DPP4	P27487
MOL000268	(1S,5S)-1-isopropyl-4-methylenebicyclo[3.1.0]hexane	TAR02928	Trypsin-1	PRSS1	P07477
MOL000268	(1S,5S)-1-isopropyl-4-methylenebicyclo[3.1.0]hexane	TAR03276	Nuclear receptor coactivator 2	NCOA2	Q15596
MOL000340	HCI	TAR00006	Prostaglandin G/H synthase 1	PTGS1	P23219
MOL000340	HCI	TAR00017	Prothrombin	F2	P00734
MOL000340	HCI	TAR00094	Prostaglandin G/H synthase 2	PTGS2	P35354
MOL000340	HCI	TAR00095	Nitric oxide synthase, endothelial	NOS3	P29474
MOL000340	HCI	TAR00117	Carbonic anhydrase 2	CA2	P00918
MOL000340	HCI	TAR00186	Sodium-dependent noradrenaline transporter	SLC6A2	P23975
MOL000340	HCI	TAR00239	Sodium-dependent dopamine transporter	SLC6A3	Q01959
MOL000340	HCI	TAR00332	Dipeptidyl peptidase 4	DPP4	P27487
MOL000340	HCI	TAR00499	Endoribonuclease LACTB2	LACTB2	Q53H82
MOL000340	HCI	TAR00565	Amine oxidase [flavin-containing] B	MAOB	P27338
MOL000340	HCI	TAR00566	Amine oxidase [flavin-containing] A	MAOA	P21397
MOL000340	HCI	TAR00727	Alcohol dehydrogenase 1C	ADH1C	P00326
MOL000340	HCI	TAR01172	Lysozyme C	LYZ	P61626
MOL000340	HCI	TAR02928	Trypsin-1	PRSS1	P07477
MOL000475	anethole	TAR00414	Transcription factor AP-1	JUN	P05412
MOL000475	anethole	TAR03978	Interleukin-2	IL2	P60568
MOL000475	anethole	TAR00038	Muscarinic acetylcholine receptor M1	CHRM1	P11229
MOL000475	anethole	TAR00099	Renin	REN	P00797
MOL000475	anethole	TAR00117	Carbonic anhydrase 2	CA2	P00918
MOL000475	anethole	TAR00126	Alpha-2C adrenergic receptor	ADRA2C	P18825
MOL000475	anethole	TAR00186	Sodium-dependent noradrenaline transporter	SLC6A2	P23975
MOL000475	anethole	TAR00191	Alpha-1A adrenergic receptor	ADRA1A	P35348
MOL000475	anethole	TAR00239	Sodium-dependent dopamine transporter	SLC6A3	Q01959
MOL000475	anethole	TAR00261	Beta-2 adrenergic receptor	ADRB2	P07550
MOL000475	anethole	TAR00332	Dipeptidyl peptidase 4	DPP4	P27487
MOL000475	anethole	TAR00499	Endoribonuclease LACTB2	LACTB2	Q53H82
MOL000475	anethole	TAR00565	Amine oxidase [flavin-containing] B	MAOB	P27338
MOL000475	anethole	TAR00566	Amine oxidase [flavin-containing] A	MAOA	P21397
MOL000475	anethole	TAR01172	Lysozyme C	LYZ	P61626
MOL000475	anethole	TAR02928	Trypsin-1	PRSS1	P07477
MOL000475	anethole	TAR03952	Trypsin-3	PRSS3	P35030
MOL000608	()-Terpinen-4-ol	TAR00016	Muscarinic acetylcholine receptor M3	CHRM3	P20309
MOL000608	()-Terpinen-4-ol	TAR00017	Prothrombin	F2	P00734
MOL000608	()-Terpinen-4-ol	TAR00038	Muscarinic acetylcholine receptor M1	CHRM1	P11229
MOL000608	()-Terpinen-4-ol	TAR00141	Gamma-aminobutyric acid receptor subunit alpha-2	GABRA2	P47869
MOL000608	()-Terpinen-4-ol	TAR00165	Acetylcholinesterase	ACHE	P22303
MOL000608	()-Terpinen-4-ol	TAR00181	Gamma-aminobutyric acid receptor subunit alpha-5	GABRA5	P31644
MOL000608	()-Terpinen-4-ol	TAR00186	Sodium-dependent noradrenaline transporter	SLC6A2	P23975
MOL000608	()-Terpinen-4-ol	TAR00200	Gamma-aminobutyric acid receptor subunit alpha-3	GABRA3	P34903
MOL000608	()-Terpinen-4-ol	TAR00210	Muscarinic acetylcholine receptor M2	CHRM2	P08172
MOL000608	()-Terpinen-4-ol	TAR00216	Alpha-1B adrenergic receptor	ADRA1B	P35368
MOL000608	()-Terpinen-4-ol	TAR00284	Neuronal acetylcholine receptor subunit alpha-2	CHRNA2	Q15822
MOL000608	()-Terpinen-4-ol	TAR00309	Gamma-aminobutyric acid receptor subunit alpha-1	GABRA1	P14867
MOL000608	()-Terpinen-4-ol	TAR00332	Dipeptidyl peptidase 4	DPP4	P27487
MOL000608	()-Terpinen-4-ol	TAR01201	Immunoglobulin heavy constant gamma 1	IGHG1	P01857
MOL000608	()-Terpinen-4-ol	TAR02928	Trypsin-1	PRSS1	P07477
MOL000608	()-Terpinen-4-ol	TAR03284	Gamma-aminobutyric acid receptor subunit alpha-6	GABRA6	Q16445
MOL000968	beta-Bisabolene	TAR00017	Prothrombin	F2	P00734
MOL000968	beta-Bisabolene	TAR00094	Prostaglandin G/H synthase 2	PTGS2	P35354
MOL000968	beta-Bisabolene	TAR00095	Nitric oxide synthase, endothelial	NOS3	P29474
MOL000968	beta-Bisabolene	TAR00117	Carbonic anhydrase 2	CA2	P00918
MOL000968	beta-Bisabolene	TAR00165	Acetylcholinesterase	ACHE	P22303
MOL000968	beta-Bisabolene	TAR00186	Sodium-dependent noradrenaline transporter	SLC6A2	P23975
MOL000968	beta-Bisabolene	TAR00309	Gamma-aminobutyric acid receptor subunit alpha-1	GABRA1	P14867
MOL000968	beta-Bisabolene	TAR00332	Dipeptidyl peptidase 4	DPP4	P27487
MOL000968	beta-Bisabolene	TAR00565	Amine oxidase [flavin-containing] B	MAOB	P27338
MOL000968	beta-Bisabolene	TAR00726	Alcohol dehydrogenase 1B	ADH1B	P00325
MOL000968	beta-Bisabolene	TAR00727	Alcohol dehydrogenase 1C	ADH1C	P00326
MOL000968	beta-Bisabolene	TAR02928	Trypsin-1	PRSS1	P07477
MOL000968	beta-Bisabolene	TAR03276	Nuclear receptor coactivator 2	NCOA2	Q15596
MOL001201	(1R,5R,7S)-4,7-dimethyl-7-(4-methylpent-3-enyl)bicyclo[3.1.1]hept-3-ene	TAR00016	Muscarinic acetylcholine receptor M3	CHRM3	P20309
MOL001201	(1R,5R,7S)-4,7-dimethyl-7-(4-methylpent-3-enyl)bicyclo[3.1.1]hept-3-ene	TAR00017	Prothrombin	F2	P00734
MOL001201	(1R,5R,7S)-4,7-dimethyl-7-(4-methylpent-3-enyl)bicyclo[3.1.1]hept-3-ene	TAR00038	Muscarinic acetylcholine receptor M1	CHRM1	P11229
MOL001201	(1R,5R,7S)-4,7-dimethyl-7-(4-methylpent-3-enyl)bicyclo[3.1.1]hept-3-ene	TAR00046	Estrogen receptor	ESR1	P03372
MOL001201	(1R,5R,7S)-4,7-dimethyl-7-(4-methylpent-3-enyl)bicyclo[3.1.1]hept-3-ene	TAR00048	Androgen receptor	AR	P10275
MOL001201	(1R,5R,7S)-4,7-dimethyl-7-(4-methylpent-3-enyl)bicyclo[3.1.1]hept-3-ene	TAR00094	Prostaglandin G/H synthase 2	PTGS2	P35354
MOL001201	(1R,5R,7S)-4,7-dimethyl-7-(4-methylpent-3-enyl)bicyclo[3.1.1]hept-3-ene	TAR00095	Nitric oxide synthase, endothelial	NOS3	P29474
MOL001201	(1R,5R,7S)-4,7-dimethyl-7-(4-methylpent-3-enyl)bicyclo[3.1.1]hept-3-ene	TAR00117	Carbonic anhydrase 2	CA2	P00918
MOL001201	(1R,5R,7S)-4,7-dimethyl-7-(4-methylpent-3-enyl)bicyclo[3.1.1]hept-3-ene	TAR00158	Retinoic acid receptor RXR-alpha	RXRA	P19793
MOL001201	(1R,5R,7S)-4,7-dimethyl-7-(4-methylpent-3-enyl)bicyclo[3.1.1]hept-3-ene	TAR00165	Acetylcholinesterase	ACHE	P22303
MOL001201	(1R,5R,7S)-4,7-dimethyl-7-(4-methylpent-3-enyl)bicyclo[3.1.1]hept-3-ene	TAR00186	Sodium-dependent noradrenaline transporter	SLC6A2	P23975
MOL001201	(1R,5R,7S)-4,7-dimethyl-7-(4-methylpent-3-enyl)bicyclo[3.1.1]hept-3-ene	TAR00210	Muscarinic acetylcholine receptor M2	CHRM2	P08172
MOL001201	(1R,5R,7S)-4,7-dimethyl-7-(4-methylpent-3-enyl)bicyclo[3.1.1]hept-3-ene	TAR00239	Sodium-dependent dopamine transporter	SLC6A3	Q01959
MOL001201	(1R,5R,7S)-4,7-dimethyl-7-(4-methylpent-3-enyl)bicyclo[3.1.1]hept-3-ene	TAR00309	Gamma-aminobutyric acid receptor subunit alpha-1	GABRA1	P14867
MOL001201	(1R,5R,7S)-4,7-dimethyl-7-(4-methylpent-3-enyl)bicyclo[3.1.1]hept-3-ene	TAR00332	Dipeptidyl peptidase 4	DPP4	P27487
MOL001201	(1R,5R,7S)-4,7-dimethyl-7-(4-methylpent-3-enyl)bicyclo[3.1.1]hept-3-ene	TAR03276	Nuclear receptor coactivator 2	NCOA2	Q15596
MOL001201	(1R,5R,7S)-4,7-dimethyl-7-(4-methylpent-3-enyl)bicyclo[3.1.1]hept-3-ene	TAR03284	Gamma-aminobutyric acid receptor subunit alpha-6	GABRA6	Q16445
MOL000130	CAM	TAR00038	Muscarinic acetylcholine receptor M1	CHRM1	P11229
MOL000130	CAM	TAR00141	Gamma-aminobutyric acid receptor subunit alpha-2	GABRA2	P47869
MOL000130	CAM	TAR00210	Muscarinic acetylcholine receptor M2	CHRM2	P08172
MOL000130	CAM	TAR02928	Trypsin-1	PRSS1	P07477
MOL001556	Isocaryophyllene	TAR00006	Prostaglandin G/H synthase 1	PTGS1	P23219
MOL001556	Isocaryophyllene	TAR00016	Muscarinic acetylcholine receptor M3	CHRM3	P20309
MOL001556	Isocaryophyllene	TAR00017	Prothrombin	F2	P00734
MOL001556	Isocaryophyllene	TAR00038	Muscarinic acetylcholine receptor M1	CHRM1	P11229
MOL001556	Isocaryophyllene	TAR00046	Estrogen receptor	ESR1	P03372
MOL001556	Isocaryophyllene	TAR00094	Prostaglandin G/H synthase 2	PTGS2	P35354
MOL001556	Isocaryophyllene	TAR00095	Nitric oxide synthase, endothelial	NOS3	P29474
MOL001556	Isocaryophyllene	TAR00117	Carbonic anhydrase 2	CA2	P00918
MOL001556	Isocaryophyllene	TAR00141	Gamma-aminobutyric acid receptor subunit alpha-2	GABRA2	P47869
MOL001556	Isocaryophyllene	TAR00165	Acetylcholinesterase	ACHE	P22303
MOL001556	Isocaryophyllene	TAR00186	Sodium-dependent noradrenaline transporter	SLC6A2	P23975
MOL001556	Isocaryophyllene	TAR00191	Alpha-1A adrenergic receptor	ADRA1A	P35348
MOL001556	Isocaryophyllene	TAR00210	Muscarinic acetylcholine receptor M2	CHRM2	P08172
MOL001556	Isocaryophyllene	TAR00216	Alpha-1B adrenergic receptor	ADRA1B	P35368
MOL001556	Isocaryophyllene	TAR00309	Gamma-aminobutyric acid receptor subunit alpha-1	GABRA1	P14867
MOL001556	Isocaryophyllene	TAR00332	Dipeptidyl peptidase 4	DPP4	P27487
MOL001556	Isocaryophyllene	TAR03276	Nuclear receptor coactivator 2	NCOA2	Q15596
MOL001556	Isocaryophyllene	TAR03284	Gamma-aminobutyric acid receptor subunit alpha-6	GABRA6	Q16445
MOL000266	beta-Cubebene	TAR00003	Nitric oxide synthase, inducible	NOS2	P35228
MOL000266	beta-Cubebene	TAR00017	Prothrombin	F2	P00734
MOL000266	beta-Cubebene	TAR00038	Muscarinic acetylcholine receptor M1	CHRM1	P11229
MOL000266	beta-Cubebene	TAR00094	Prostaglandin G/H synthase 2	PTGS2	P35354
MOL000266	beta-Cubebene	TAR00095	Nitric oxide synthase, endothelial	NOS3	P29474
MOL000266	beta-Cubebene	TAR00165	Acetylcholinesterase	ACHE	P22303
MOL000266	beta-Cubebene	TAR00186	Sodium-dependent noradrenaline transporter	SLC6A2	P23975
MOL000266	beta-Cubebene	TAR00210	Muscarinic acetylcholine receptor M2	CHRM2	P08172
MOL000266	beta-Cubebene	TAR00284	Neuronal acetylcholine receptor subunit alpha-2	CHRNA2	Q15822
MOL000266	beta-Cubebene	TAR00309	Gamma-aminobutyric acid receptor subunit alpha-1	GABRA1	P14867
MOL000266	beta-Cubebene	TAR00332	Dipeptidyl peptidase 4	DPP4	P27487
MOL000266	beta-Cubebene	TAR00499	Endoribonuclease LACTB2	LACTB2	Q53H82
MOL000270	CHEBI:7	TAR00016	Muscarinic acetylcholine receptor M3	CHRM3	P20309
MOL000270	CHEBI:7	TAR00038	Muscarinic acetylcholine receptor M1	CHRM1	P11229
MOL000270	CHEBI:7	TAR00046	Estrogen receptor	ESR1	P03372
MOL000270	CHEBI:7	TAR00048	Androgen receptor	AR	P10275
MOL000270	CHEBI:7	TAR00079	Coagulation factor X	F10	P00742
MOL000270	CHEBI:7	TAR00094	Prostaglandin G/H synthase 2	PTGS2	P35354
MOL000270	CHEBI:7	TAR00117	Carbonic anhydrase 2	CA2	P00918
MOL000270	CHEBI:7	TAR00154	Muscarinic acetylcholine receptor M4	CHRM4	P08173
MOL000270	CHEBI:7	TAR00165	Acetylcholinesterase	ACHE	P22303
MOL000270	CHEBI:7	TAR00172	cGMP-inhibited 3',5'-cyclic phosphodiesterase A	PDE3A	Q14432
MOL000270	CHEBI:7	TAR00175	5-hydroxytryptamine receptor 2A	HTR2A	P28223
MOL000270	CHEBI:7	TAR00210	Muscarinic acetylcholine receptor M2	CHRM2	P08172
MOL000270	CHEBI:7	TAR00216	Alpha-1B adrenergic receptor	ADRA1B	P35368
MOL000270	CHEBI:7	TAR00261	Beta-2 adrenergic receptor	ADRB2	P07550
MOL000270	CHEBI:7	TAR00290	Sodium-dependent serotonin transporter	SLC6A4	P31645
MOL000270	CHEBI:7	TAR00309	Gamma-aminobutyric acid receptor subunit alpha-1	GABRA1	P14867
MOL000270	CHEBI:7	TAR02966	Serine/threonine-protein kinase pim-1	PIM1	P11309
MOL000270	CHEBI:7	TAR03276	Nuclear receptor coactivator 2	NCOA2	Q15596
MOL001587	(E)-5-(4-hydroxy-3-methoxy-phenyl)-1-piperidino-pent-2-en-1-one	TAR00003	Nitric oxide synthase, inducible	NOS2	P35228
MOL001587	(E)-5-(4-hydroxy-3-methoxy-phenyl)-1-piperidino-pent-2-en-1-one	TAR00016	Muscarinic acetylcholine receptor M3	CHRM3	P20309
MOL001587	(E)-5-(4-hydroxy-3-methoxy-phenyl)-1-piperidino-pent-2-en-1-one	TAR00017	Prothrombin	F2	P00734
MOL001587	(E)-5-(4-hydroxy-3-methoxy-phenyl)-1-piperidino-pent-2-en-1-one	TAR00038	Muscarinic acetylcholine receptor M1	CHRM1	P11229
MOL001587	(E)-5-(4-hydroxy-3-methoxy-phenyl)-1-piperidino-pent-2-en-1-one	TAR00046	Estrogen receptor	ESR1	P03372
MOL001587	(E)-5-(4-hydroxy-3-methoxy-phenyl)-1-piperidino-pent-2-en-1-one	TAR00048	Androgen receptor	AR	P10275
MOL001587	(E)-5-(4-hydroxy-3-methoxy-phenyl)-1-piperidino-pent-2-en-1-one	TAR00064	Sodium channel protein type 10 subunit alpha	SCN10A	Q9Y5Y9
MOL001587	(E)-5-(4-hydroxy-3-methoxy-phenyl)-1-piperidino-pent-2-en-1-one	TAR00070	Sodium channel protein type 5 subunit alpha	SCN5A	Q14524
MOL001587	(E)-5-(4-hydroxy-3-methoxy-phenyl)-1-piperidino-pent-2-en-1-one	TAR00078	Peroxisome proliferator-activated receptor gamma	PPARG	P37231
MOL001587	(E)-5-(4-hydroxy-3-methoxy-phenyl)-1-piperidino-pent-2-en-1-one	TAR00094	Prostaglandin G/H synthase 2	PTGS2	P35354
MOL001587	(E)-5-(4-hydroxy-3-methoxy-phenyl)-1-piperidino-pent-2-en-1-one	TAR00095	Nitric oxide synthase, endothelial	NOS3	P29474
MOL001587	(E)-5-(4-hydroxy-3-methoxy-phenyl)-1-piperidino-pent-2-en-1-one	TAR00117	Carbonic anhydrase 2	CA2	P00918
MOL001587	(E)-5-(4-hydroxy-3-methoxy-phenyl)-1-piperidino-pent-2-en-1-one	TAR00126	Alpha-2C adrenergic receptor	ADRA2C	P18825
MOL001587	(E)-5-(4-hydroxy-3-methoxy-phenyl)-1-piperidino-pent-2-en-1-one	TAR00158	Retinoic acid receptor RXR-alpha	RXRA	P19793
MOL001587	(E)-5-(4-hydroxy-3-methoxy-phenyl)-1-piperidino-pent-2-en-1-one	TAR00165	Acetylcholinesterase	ACHE	P22303
MOL001587	(E)-5-(4-hydroxy-3-methoxy-phenyl)-1-piperidino-pent-2-en-1-one	TAR00172	cGMP-inhibited 3',5'-cyclic phosphodiesterase A	PDE3A	Q14432
MOL001587	(E)-5-(4-hydroxy-3-methoxy-phenyl)-1-piperidino-pent-2-en-1-one	TAR00186	Sodium-dependent noradrenaline transporter	SLC6A2	P23975
MOL001587	(E)-5-(4-hydroxy-3-methoxy-phenyl)-1-piperidino-pent-2-en-1-one	TAR00210	Muscarinic acetylcholine receptor M2	CHRM2	P08172
MOL001587	(E)-5-(4-hydroxy-3-methoxy-phenyl)-1-piperidino-pent-2-en-1-one	TAR00214	Alpha-2B adrenergic receptor	ADRA2B	P18089
MOL001587	(E)-5-(4-hydroxy-3-methoxy-phenyl)-1-piperidino-pent-2-en-1-one	TAR00216	Alpha-1B adrenergic receptor	ADRA1B	P35368
MOL001587	(E)-5-(4-hydroxy-3-methoxy-phenyl)-1-piperidino-pent-2-en-1-one	TAR00239	Sodium-dependent dopamine transporter	SLC6A3	Q01959
MOL001587	(E)-5-(4-hydroxy-3-methoxy-phenyl)-1-piperidino-pent-2-en-1-one	TAR00261	Beta-2 adrenergic receptor	ADRB2	P07550
MOL001587	(E)-5-(4-hydroxy-3-methoxy-phenyl)-1-piperidino-pent-2-en-1-one	TAR00290	Sodium-dependent serotonin transporter	SLC6A4	P31645
MOL001587	(E)-5-(4-hydroxy-3-methoxy-phenyl)-1-piperidino-pent-2-en-1-one	TAR00332	Dipeptidyl peptidase 4	DPP4	P27487
MOL001587	(E)-5-(4-hydroxy-3-methoxy-phenyl)-1-piperidino-pent-2-en-1-one	TAR00521	Leukotriene A-4 hydrolase	LTA4H	P09960
MOL001587	(E)-5-(4-hydroxy-3-methoxy-phenyl)-1-piperidino-pent-2-en-1-one	TAR00565	Amine oxidase [flavin-containing] B	MAOB	P27338
MOL001587	(E)-5-(4-hydroxy-3-methoxy-phenyl)-1-piperidino-pent-2-en-1-one	TAR02928	Trypsin-1	PRSS1	P07477
MOL001587	(E)-5-(4-hydroxy-3-methoxy-phenyl)-1-piperidino-pent-2-en-1-one	TAR03025	Cyclin-A2	CCNA2	P20248
MOL001593	Piperitenone	TAR00017	Prothrombin	F2	P00734
MOL001593	Piperitenone	TAR00038	Muscarinic acetylcholine receptor M1	CHRM1	P11229
MOL001593	Piperitenone	TAR00141	Gamma-aminobutyric acid receptor subunit alpha-2	GABRA2	P47869
MOL001593	Piperitenone	TAR00165	Acetylcholinesterase	ACHE	P22303
MOL001593	Piperitenone	TAR00181	Gamma-aminobutyric acid receptor subunit alpha-5	GABRA5	P31644
MOL001593	Piperitenone	TAR00200	Gamma-aminobutyric acid receptor subunit alpha-3	GABRA3	P34903
MOL001593	Piperitenone	TAR00210	Muscarinic acetylcholine receptor M2	CHRM2	P08172
MOL001593	Piperitenone	TAR00216	Alpha-1B adrenergic receptor	ADRA1B	P35368
MOL001593	Piperitenone	TAR00309	Gamma-aminobutyric acid receptor subunit alpha-1	GABRA1	P14867
MOL001593	Piperitenone	TAR00332	Dipeptidyl peptidase 4	DPP4	P27487
MOL001593	Piperitenone	TAR02928	Trypsin-1	PRSS1	P07477
MOL001593	Piperitenone	TAR03284	Gamma-aminobutyric acid receptor subunit alpha-6	GABRA6	Q16445
MOL000612	(-)-alpha-cedrene	TAR00016	Muscarinic acetylcholine receptor M3	CHRM3	P20309
MOL000612	(-)-alpha-cedrene	TAR00017	Prothrombin	F2	P00734
MOL000612	(-)-alpha-cedrene	TAR00038	Muscarinic acetylcholine receptor M1	CHRM1	P11229
MOL000612	(-)-alpha-cedrene	TAR00046	Estrogen receptor	ESR1	P03372
MOL000612	(-)-alpha-cedrene	TAR00094	Prostaglandin G/H synthase 2	PTGS2	P35354
MOL000612	(-)-alpha-cedrene	TAR00117	Carbonic anhydrase 2	CA2	P00918
MOL000612	(-)-alpha-cedrene	TAR00141	Gamma-aminobutyric acid receptor subunit alpha-2	GABRA2	P47869
MOL000612	(-)-alpha-cedrene	TAR00158	Retinoic acid receptor RXR-alpha	RXRA	P19793
MOL000612	(-)-alpha-cedrene	TAR00165	Acetylcholinesterase	ACHE	P22303
MOL000612	(-)-alpha-cedrene	TAR00309	Gamma-aminobutyric acid receptor subunit alpha-1	GABRA1	P14867
MOL000612	(-)-alpha-cedrene	TAR00332	Dipeptidyl peptidase 4	DPP4	P27487
MOL000612	(-)-alpha-cedrene	TAR00499	Endoribonuclease LACTB2	LACTB2	Q53H82
MOL000612	(-)-alpha-cedrene	TAR00726	Alcohol dehydrogenase 1B	ADH1B	P00325
MOL000612	(-)-alpha-cedrene	TAR00727	Alcohol dehydrogenase 1C	ADH1C	P00326
MOL000612	(-)-alpha-cedrene	TAR03276	Nuclear receptor coactivator 2	NCOA2	Q15596
MOL001555	ZINC03996196	TAR00003	Nitric oxide synthase, inducible	NOS2	P35228
MOL001555	ZINC03996196	TAR00017	Prothrombin	F2	P00734
MOL001555	ZINC03996196	TAR00037	Potassium voltage-gated channel subfamily H member 2	KCNH2	Q12809
MOL001555	ZINC03996196	TAR00046	Estrogen receptor	ESR1	P03372
MOL001555	ZINC03996196	TAR00048	Androgen receptor	AR	P10275
MOL001555	ZINC03996196	TAR00070	Sodium channel protein type 5 subunit alpha	SCN5A	Q14524
MOL001555	ZINC03996196	TAR00078	Peroxisome proliferator-activated receptor gamma	PPARG	P37231
MOL001555	ZINC03996196	TAR00079	Coagulation factor X	F10	P00742
MOL001555	ZINC03996196	TAR00094	Prostaglandin G/H synthase 2	PTGS2	P35354
MOL001555	ZINC03996196	TAR00095	Nitric oxide synthase, endothelial	NOS3	P29474
MOL001555	ZINC03996196	TAR00117	Carbonic anhydrase 2	CA2	P00918
MOL001555	ZINC03996196	TAR00158	Retinoic acid receptor RXR-alpha	RXRA	P19793
MOL001555	ZINC03996196	TAR00165	Acetylcholinesterase	ACHE	P22303
MOL001555	ZINC03996196	TAR00261	Beta-2 adrenergic receptor	ADRB2	P07550
MOL001555	ZINC03996196	TAR00272	Alpha-1D adrenergic receptor	ADRA1D	P25100
MOL001555	ZINC03996196	TAR00307	Estrogen receptor beta	ESR2	Q92731
MOL001555	ZINC03996196	TAR00332	Dipeptidyl peptidase 4	DPP4	P27487
MOL001555	ZINC03996196	TAR00422	Glycogen synthase kinase-3 beta	GSK3B	P49841
MOL001555	ZINC03996196	TAR00647	Serine/threonine-protein kinase Chk1	CHEK1	O14757
MOL001555	ZINC03996196	TAR02928	Trypsin-1	PRSS1	P07477
MOL001555	ZINC03996196	TAR02966	Serine/threonine-protein kinase pim-1	PIM1	P11309
MOL001555	ZINC03996196	TAR03276	Nuclear receptor coactivator 2	NCOA2	Q15596
MOL001605	cis-2-Decalone	TAR00017	Prothrombin	F2	P00734
MOL001605	cis-2-Decalone	TAR00095	Nitric oxide synthase, endothelial	NOS3	P29474
MOL001605	cis-2-Decalone	TAR00117	Carbonic anhydrase 2	CA2	P00918
MOL001605	cis-2-Decalone	TAR00165	Acetylcholinesterase	ACHE	P22303
MOL001605	cis-2-Decalone	TAR00332	Dipeptidyl peptidase 4	DPP4	P27487
MOL001605	cis-2-Decalone	TAR02928	Trypsin-1	PRSS1	P07477
MOL001606	BB_NC-0668	TAR00006	Prostaglandin G/H synthase 1	PTGS1	P23219
MOL001606	BB_NC-0668	TAR00016	Muscarinic acetylcholine receptor M3	CHRM3	P20309
MOL001606	BB_NC-0668	TAR00017	Prothrombin	F2	P00734
MOL001606	BB_NC-0668	TAR00038	Muscarinic acetylcholine receptor M1	CHRM1	P11229
MOL001606	BB_NC-0668	TAR00046	Estrogen receptor	ESR1	P03372
MOL001606	BB_NC-0668	TAR00094	Prostaglandin G/H synthase 2	PTGS2	P35354
MOL001606	BB_NC-0668	TAR00095	Nitric oxide synthase, endothelial	NOS3	P29474
MOL001606	BB_NC-0668	TAR00117	Carbonic anhydrase 2	CA2	P00918
MOL001606	BB_NC-0668	TAR00141	Gamma-aminobutyric acid receptor subunit alpha-2	GABRA2	P47869
MOL001606	BB_NC-0668	TAR00158	Retinoic acid receptor RXR-alpha	RXRA	P19793
MOL001606	BB_NC-0668	TAR00165	Acetylcholinesterase	ACHE	P22303
MOL001606	BB_NC-0668	TAR00186	Sodium-dependent noradrenaline transporter	SLC6A2	P23975
MOL001606	BB_NC-0668	TAR00210	Muscarinic acetylcholine receptor M2	CHRM2	P08172
MOL001606	BB_NC-0668	TAR00216	Alpha-1B adrenergic receptor	ADRA1B	P35368
MOL001606	BB_NC-0668	TAR00309	Gamma-aminobutyric acid receptor subunit alpha-1	GABRA1	P14867
MOL001606	BB_NC-0668	TAR00332	Dipeptidyl peptidase 4	DPP4	P27487
MOL001606	BB_NC-0668	TAR00499	Endoribonuclease LACTB2	LACTB2	Q53H82
MOL001606	BB_NC-0668	TAR00565	Amine oxidase [flavin-containing] B	MAOB	P27338
MOL001606	BB_NC-0668	TAR02928	Trypsin-1	PRSS1	P07477
MOL001606	BB_NC-0668	TAR03276	Nuclear receptor coactivator 2	NCOA2	Q15596
MOL001606	BB_NC-0668	TAR03284	Gamma-aminobutyric acid receptor subunit alpha-6	GABRA6	Q16445
MOL001558	sesamin	TAR00003	Nitric oxide synthase, inducible	NOS2	P35228
MOL001558	sesamin	TAR00231	Acetyl-CoA carboxylase 1	ACACA	Q13085
MOL001558	sesamin	TAR00374	Fatty acid synthase	FASN	P49327
MOL001558	sesamin	TAR00670	Cytochrome P450 2B6	CYP2B6	P20813
MOL001558	sesamin	TAR00706	Endothelin-converting enzyme 1	ECE1	P42892
MOL001558	sesamin	TAR01604	Glucose-6-phosphate 1-dehydrogenase	G6PD	P11413
MOL001558	sesamin	TAR02967	Medium-chain specific acyl-CoA dehydrogenase, mitochondrial	ACADM	P11310
MOL001558	sesamin	TAR03215	Enoyl-CoA delta isomerase 1, mitochondrial	ECI1	P42126
MOL001558	sesamin	TAR03290	2,4-dienoyl-CoA reductase, mitochondrial	DECR1	Q16698
MOL001558	sesamin	TAR03981	Peroxisomal bifunctional enzyme	EHHADH	Q08426
MOL001558	sesamin	TAR00046	Estrogen receptor	ESR1	P03372
MOL001558	sesamin	TAR00048	Androgen receptor	AR	P10275
MOL001558	sesamin	TAR00070	Sodium channel protein type 5 subunit alpha	SCN5A	Q14524
MOL001558	sesamin	TAR00079	Coagulation factor X	F10	P00742
MOL001558	sesamin	TAR00094	Prostaglandin G/H synthase 2	PTGS2	P35354
MOL001558	sesamin	TAR00165	Acetylcholinesterase	ACHE	P22303
MOL001558	sesamin	TAR00229	Tyrosine-protein phosphatase non-receptor type 1	PTPN1	P18031
MOL001558	sesamin	TAR00307	Estrogen receptor beta	ESR2	Q92731
MOL001558	sesamin	TAR00332	Dipeptidyl peptidase 4	DPP4	P27487
MOL001558	sesamin	TAR00402	Mitogen-activated protein kinase 14	MAPK14	Q16539
MOL001558	sesamin	TAR00422	Glycogen synthase kinase-3 beta	GSK3B	P49841
MOL001558	sesamin	TAR02928	Trypsin-1	PRSS1	P07477
MOL001558	sesamin	TAR02966	Serine/threonine-protein kinase pim-1	PIM1	P11309
MOL001559	piperlonguminine	TAR02889	Serum amyloid A-1 protein	SAA1	P0DJI8
MOL001559	piperlonguminine	TAR00003	Nitric oxide synthase, inducible	NOS2	P35228
MOL001559	piperlonguminine	TAR00017	Prothrombin	F2	P00734
MOL001559	piperlonguminine	TAR00038	Muscarinic acetylcholine receptor M1	CHRM1	P11229
MOL001559	piperlonguminine	TAR00046	Estrogen receptor	ESR1	P03372
MOL001559	piperlonguminine	TAR00048	Androgen receptor	AR	P10275
MOL001559	piperlonguminine	TAR00078	Peroxisome proliferator-activated receptor gamma	PPARG	P37231
MOL001559	piperlonguminine	TAR00095	Nitric oxide synthase, endothelial	NOS3	P29474
MOL001559	piperlonguminine	TAR00117	Carbonic anhydrase 2	CA2	P00918
MOL001559	piperlonguminine	TAR00158	Retinoic acid receptor RXR-alpha	RXRA	P19793
MOL001559	piperlonguminine	TAR00172	cGMP-inhibited 3',5'-cyclic phosphodiesterase A	PDE3A	Q14432
MOL001559	piperlonguminine	TAR00216	Alpha-1B adrenergic receptor	ADRA1B	P35368
MOL001559	piperlonguminine	TAR00239	Sodium-dependent dopamine transporter	SLC6A3	Q01959
MOL001559	piperlonguminine	TAR00261	Beta-2 adrenergic receptor	ADRB2	P07550
MOL001559	piperlonguminine	TAR00290	Sodium-dependent serotonin transporter	SLC6A4	P31645
MOL001559	piperlonguminine	TAR00332	Dipeptidyl peptidase 4	DPP4	P27487
MOL001559	piperlonguminine	TAR00402	Mitogen-activated protein kinase 14	MAPK14	Q16539
MOL001559	piperlonguminine	TAR00422	Glycogen synthase kinase-3 beta	GSK3B	P49841
MOL001559	piperlonguminine	TAR00482	Cyclin-dependent kinase 2	CDK2	P24941
MOL001559	piperlonguminine	TAR00521	Leukotriene A-4 hydrolase	LTA4H	P09960
MOL001559	piperlonguminine	TAR00565	Amine oxidase [flavin-containing] B	MAOB	P27338
MOL001559	piperlonguminine	TAR02928	Trypsin-1	PRSS1	P07477
MOL001559	piperlonguminine	TAR03025	Cyclin-A2	CCNA2	P20248
MOL001560	pipernonaline	TAR00003	Nitric oxide synthase, inducible	NOS2	P35228
MOL001560	pipernonaline	TAR00016	Muscarinic acetylcholine receptor M3	CHRM3	P20309
MOL001560	pipernonaline	TAR00017	Prothrombin	F2	P00734
MOL001560	pipernonaline	TAR00038	Muscarinic acetylcholine receptor M1	CHRM1	P11229
MOL001560	pipernonaline	TAR00046	Estrogen receptor	ESR1	P03372
MOL001560	pipernonaline	TAR00048	Androgen receptor	AR	P10275
MOL001560	pipernonaline	TAR00063	Beta-1 adrenergic receptor	ADRB1	P08588
MOL001560	pipernonaline	TAR00070	Sodium channel protein type 5 subunit alpha	SCN5A	Q14524
MOL001560	pipernonaline	TAR00078	Peroxisome proliferator-activated receptor gamma	PPARG	P37231
MOL001560	pipernonaline	TAR00095	Nitric oxide synthase, endothelial	NOS3	P29474
MOL001560	pipernonaline	TAR00126	Alpha-2C adrenergic receptor	ADRA2C	P18825
MOL001560	pipernonaline	TAR00172	cGMP-inhibited 3',5'-cyclic phosphodiesterase A	PDE3A	Q14432
MOL001560	pipernonaline	TAR00186	Sodium-dependent noradrenaline transporter	SLC6A2	P23975
MOL001560	pipernonaline	TAR00216	Alpha-1B adrenergic receptor	ADRA1B	P35368
MOL001560	pipernonaline	TAR00239	Sodium-dependent dopamine transporter	SLC6A3	Q01959
MOL001560	pipernonaline	TAR00261	Beta-2 adrenergic receptor	ADRB2	P07550
MOL001560	pipernonaline	TAR02928	Trypsin-1	PRSS1	P07477
MOL001561	dehydropipernonaline	TAR00003	Nitric oxide synthase, inducible	NOS2	P35228
MOL001561	dehydropipernonaline	TAR00016	Muscarinic acetylcholine receptor M3	CHRM3	P20309
MOL001561	dehydropipernonaline	TAR00017	Prothrombin	F2	P00734
MOL001561	dehydropipernonaline	TAR00038	Muscarinic acetylcholine receptor M1	CHRM1	P11229
MOL001561	dehydropipernonaline	TAR00046	Estrogen receptor	ESR1	P03372
MOL001561	dehydropipernonaline	TAR00048	Androgen receptor	AR	P10275
MOL001561	dehydropipernonaline	TAR00070	Sodium channel protein type 5 subunit alpha	SCN5A	Q14524
MOL001561	dehydropipernonaline	TAR00078	Peroxisome proliferator-activated receptor gamma	PPARG	P37231
MOL001561	dehydropipernonaline	TAR00095	Nitric oxide synthase, endothelial	NOS3	P29474
MOL001561	dehydropipernonaline	TAR00126	Alpha-2C adrenergic receptor	ADRA2C	P18825
MOL001561	dehydropipernonaline	TAR00216	Alpha-1B adrenergic receptor	ADRA1B	P35368
MOL001561	dehydropipernonaline	TAR00239	Sodium-dependent dopamine transporter	SLC6A3	Q01959
MOL001561	dehydropipernonaline	TAR00261	Beta-2 adrenergic receptor	ADRB2	P07550
MOL001561	dehydropipernonaline	TAR02928	Trypsin-1	PRSS1	P07477
MOL001561	dehydropipernonaline	TAR03025	Cyclin-A2	CCNA2	P20248
MOL001566	calarene	TAR00016	Muscarinic acetylcholine receptor M3	CHRM3	P20309
MOL001566	calarene	TAR00165	Acetylcholinesterase	ACHE	P22303
MOL001575	cedryl acetate	TAR00017	Prothrombin	F2	P00734
MOL001575	cedryl acetate	TAR00046	Estrogen receptor	ESR1	P03372
MOL001575	cedryl acetate	TAR00048	Androgen receptor	AR	P10275
MOL001575	cedryl acetate	TAR00094	Prostaglandin G/H synthase 2	PTGS2	P35354
MOL001575	cedryl acetate	TAR00141	Gamma-aminobutyric acid receptor subunit alpha-2	GABRA2	P47869
MOL001575	cedryl acetate	TAR00165	Acetylcholinesterase	ACHE	P22303
MOL001575	cedryl acetate	TAR00200	Gamma-aminobutyric acid receptor subunit alpha-3	GABRA3	P34903
MOL001575	cedryl acetate	TAR00210	Muscarinic acetylcholine receptor M2	CHRM2	P08172
MOL001575	cedryl acetate	TAR00309	Gamma-aminobutyric acid receptor subunit alpha-1	GABRA1	P14867
MOL001575	cedryl acetate	TAR00332	Dipeptidyl peptidase 4	DPP4	P27487
MOL001575	cedryl acetate	TAR00581	Neuronal acetylcholine receptor subunit alpha-7	CHRNA7	P36544
MOL001575	cedryl acetate	TAR03284	Gamma-aminobutyric acid receptor subunit alpha-6	GABRA6	Q16445
MOL001608	delta-elemene	TAR00006	Prostaglandin G/H synthase 1	PTGS1	P23219
MOL001608	delta-elemene	TAR00016	Muscarinic acetylcholine receptor M3	CHRM3	P20309
MOL001608	delta-elemene	TAR00017	Prothrombin	F2	P00734
MOL001608	delta-elemene	TAR00038	Muscarinic acetylcholine receptor M1	CHRM1	P11229
MOL001608	delta-elemene	TAR00094	Prostaglandin G/H synthase 2	PTGS2	P35354
MOL001608	delta-elemene	TAR00095	Nitric oxide synthase, endothelial	NOS3	P29474
MOL001608	delta-elemene	TAR00141	Gamma-aminobutyric acid receptor subunit alpha-2	GABRA2	P47869
MOL001608	delta-elemene	TAR00158	Retinoic acid receptor RXR-alpha	RXRA	P19793
MOL001608	delta-elemene	TAR00165	Acetylcholinesterase	ACHE	P22303
MOL001608	delta-elemene	TAR00186	Sodium-dependent noradrenaline transporter	SLC6A2	P23975
MOL001608	delta-elemene	TAR00191	Alpha-1A adrenergic receptor	ADRA1A	P35348
MOL001608	delta-elemene	TAR00200	Gamma-aminobutyric acid receptor subunit alpha-3	GABRA3	P34903
MOL001608	delta-elemene	TAR00210	Muscarinic acetylcholine receptor M2	CHRM2	P08172
MOL001608	delta-elemene	TAR00216	Alpha-1B adrenergic receptor	ADRA1B	P35368
MOL001608	delta-elemene	TAR00309	Gamma-aminobutyric acid receptor subunit alpha-1	GABRA1	P14867
MOL001608	delta-elemene	TAR00332	Dipeptidyl peptidase 4	DPP4	P27487
MOL001608	delta-elemene	TAR00581	Neuronal acetylcholine receptor subunit alpha-7	CHRNA7	P36544
MOL001608	delta-elemene	TAR02928	Trypsin-1	PRSS1	P07477
MOL001608	delta-elemene	TAR03276	Nuclear receptor coactivator 2	NCOA2	Q15596
MOL001608	delta-elemene	TAR03284	Gamma-aminobutyric acid receptor subunit alpha-6	GABRA6	Q16445
MOL001577	Dodecahydropyrido [1,2-b]isoquinolin -6-one	TAR00016	Muscarinic acetylcholine receptor M3	CHRM3	P20309
MOL001577	Dodecahydropyrido [1,2-b]isoquinolin -6-one	TAR00017	Prothrombin	F2	P00734
MOL001577	Dodecahydropyrido [1,2-b]isoquinolin -6-one	TAR00038	Muscarinic acetylcholine receptor M1	CHRM1	P11229
MOL001577	Dodecahydropyrido [1,2-b]isoquinolin -6-one	TAR00141	Gamma-aminobutyric acid receptor subunit alpha-2	GABRA2	P47869
MOL001577	Dodecahydropyrido [1,2-b]isoquinolin -6-one	TAR00165	Acetylcholinesterase	ACHE	P22303
MOL001577	Dodecahydropyrido [1,2-b]isoquinolin -6-one	TAR00200	Gamma-aminobutyric acid receptor subunit alpha-3	GABRA3	P34903
MOL001577	Dodecahydropyrido [1,2-b]isoquinolin -6-one	TAR00210	Muscarinic acetylcholine receptor M2	CHRM2	P08172
MOL001577	Dodecahydropyrido [1,2-b]isoquinolin -6-one	TAR00309	Gamma-aminobutyric acid receptor subunit alpha-1	GABRA1	P14867
MOL001577	Dodecahydropyrido [1,2-b]isoquinolin -6-one	TAR00332	Dipeptidyl peptidase 4	DPP4	P27487
MOL001578	Hypnon	TAR00117	Carbonic anhydrase 2	CA2	P00918
MOL001578	Hypnon	TAR00482	Cyclin-dependent kinase 2	CDK2	P24941
MOL001578	Hypnon	TAR00726	Alcohol dehydrogenase 1B	ADH1B	P00325
MOL001578	Hypnon	TAR00727	Alcohol dehydrogenase 1C	ADH1C	P00326
MOL001578	Hypnon	TAR00729	Alcohol dehydrogenase 1A	ADH1A	P07327
MOL001578	Hypnon	TAR01172	Lysozyme C	LYZ	P61626
MOL001578	Hypnon	TAR02928	Trypsin-1	PRSS1	P07477
MOL001578	Hypnon	TAR03952	Trypsin-3	PRSS3	P35030
MOL001580	Piperonal	TAR00017	Prothrombin	F2	P00734
MOL001580	Piperonal	TAR00094	Prostaglandin G/H synthase 2	PTGS2	P35354
MOL001580	Piperonal	TAR00095	Nitric oxide synthase, endothelial	NOS3	P29474
MOL001580	Piperonal	TAR00117	Carbonic anhydrase 2	CA2	P00918
MOL001580	Piperonal	TAR00482	Cyclin-dependent kinase 2	CDK2	P24941
MOL001580	Piperonal	TAR00499	Endoribonuclease LACTB2	LACTB2	Q53H82
MOL001580	Piperonal	TAR00565	Amine oxidase [flavin-containing] B	MAOB	P27338
MOL001580	Piperonal	TAR00566	Amine oxidase [flavin-containing] A	MAOA	P21397
MOL001580	Piperonal	TAR02928	Trypsin-1	PRSS1	P07477
MOL001586	N-(2,5-dimethoxyphenyl)-4-methoxybenzamide	TAR00003	Nitric oxide synthase, inducible	NOS2	P35228
MOL001586	N-(2,5-dimethoxyphenyl)-4-methoxybenzamide	TAR00006	Prostaglandin G/H synthase 1	PTGS1	P23219
MOL001586	N-(2,5-dimethoxyphenyl)-4-methoxybenzamide	TAR00016	Muscarinic acetylcholine receptor M3	CHRM3	P20309
MOL001586	N-(2,5-dimethoxyphenyl)-4-methoxybenzamide	TAR00017	Prothrombin	F2	P00734
MOL001586	N-(2,5-dimethoxyphenyl)-4-methoxybenzamide	TAR00038	Muscarinic acetylcholine receptor M1	CHRM1	P11229
MOL001586	N-(2,5-dimethoxyphenyl)-4-methoxybenzamide	TAR00046	Estrogen receptor	ESR1	P03372
MOL001586	N-(2,5-dimethoxyphenyl)-4-methoxybenzamide	TAR00048	Androgen receptor	AR	P10275
MOL001586	N-(2,5-dimethoxyphenyl)-4-methoxybenzamide	TAR00070	Sodium channel protein type 5 subunit alpha	SCN5A	Q14524
MOL001586	N-(2,5-dimethoxyphenyl)-4-methoxybenzamide	TAR00078	Peroxisome proliferator-activated receptor gamma	PPARG	P37231
MOL001586	N-(2,5-dimethoxyphenyl)-4-methoxybenzamide	TAR00094	Prostaglandin G/H synthase 2	PTGS2	P35354
MOL001586	N-(2,5-dimethoxyphenyl)-4-methoxybenzamide	TAR00117	Carbonic anhydrase 2	CA2	P00918
MOL001586	N-(2,5-dimethoxyphenyl)-4-methoxybenzamide	TAR00154	Muscarinic acetylcholine receptor M4	CHRM4	P08173
MOL001586	N-(2,5-dimethoxyphenyl)-4-methoxybenzamide	TAR00158	Retinoic acid receptor RXR-alpha	RXRA	P19793
MOL001586	N-(2,5-dimethoxyphenyl)-4-methoxybenzamide	TAR00172	cGMP-inhibited 3',5'-cyclic phosphodiesterase A	PDE3A	Q14432
MOL001586	N-(2,5-dimethoxyphenyl)-4-methoxybenzamide	TAR00210	Muscarinic acetylcholine receptor M2	CHRM2	P08172
MOL001586	N-(2,5-dimethoxyphenyl)-4-methoxybenzamide	TAR00216	Alpha-1B adrenergic receptor	ADRA1B	P35368
MOL001586	N-(2,5-dimethoxyphenyl)-4-methoxybenzamide	TAR00239	Sodium-dependent dopamine transporter	SLC6A3	Q01959
MOL001586	N-(2,5-dimethoxyphenyl)-4-methoxybenzamide	TAR00261	Beta-2 adrenergic receptor	ADRB2	P07550
MOL001586	N-(2,5-dimethoxyphenyl)-4-methoxybenzamide	TAR00290	Sodium-dependent serotonin transporter	SLC6A4	P31645
MOL001586	N-(2,5-dimethoxyphenyl)-4-methoxybenzamide	TAR00307	Estrogen receptor beta	ESR2	Q92731
MOL001586	N-(2,5-dimethoxyphenyl)-4-methoxybenzamide	TAR00309	Gamma-aminobutyric acid receptor subunit alpha-1	GABRA1	P14867
MOL001586	N-(2,5-dimethoxyphenyl)-4-methoxybenzamide	TAR00332	Dipeptidyl peptidase 4	DPP4	P27487
MOL001586	N-(2,5-dimethoxyphenyl)-4-methoxybenzamide	TAR00402	Mitogen-activated protein kinase 14	MAPK14	Q16539
MOL001586	N-(2,5-dimethoxyphenyl)-4-methoxybenzamide	TAR00422	Glycogen synthase kinase-3 beta	GSK3B	P49841
MOL001586	N-(2,5-dimethoxyphenyl)-4-methoxybenzamide	TAR00482	Cyclin-dependent kinase 2	CDK2	P24941
MOL001586	N-(2,5-dimethoxyphenyl)-4-methoxybenzamide	TAR00521	Leukotriene A-4 hydrolase	LTA4H	P09960
MOL001586	N-(2,5-dimethoxyphenyl)-4-methoxybenzamide	TAR00647	Serine/threonine-protein kinase Chk1	CHEK1	O14757
MOL001586	N-(2,5-dimethoxyphenyl)-4-methoxybenzamide	TAR00699	cAMP-dependent protein kinase catalytic subunit alpha	PRKACA	P17612
MOL001586	N-(2,5-dimethoxyphenyl)-4-methoxybenzamide	TAR02928	Trypsin-1	PRSS1	P07477
MOL001586	N-(2,5-dimethoxyphenyl)-4-methoxybenzamide	TAR02966	Serine/threonine-protein kinase pim-1	PIM1	P11309
MOL001586	N-(2,5-dimethoxyphenyl)-4-methoxybenzamide	TAR03025	Cyclin-A2	CCNA2	P20248
MOL001588	N-isobutyleicosa-2(E),4(E),8(Z)-trienamide	TAR00017	Prothrombin	F2	P00734
MOL001589	N-Isobutyl-2,4-icosadienamide	TAR00017	Prothrombin	F2	P00734
MOL001591	p-Amino-o-cresol	TAR00727	Alcohol dehydrogenase 1C	ADH1C	P00326
MOL001591	p-Amino-o-cresol	TAR01172	Lysozyme C	LYZ	P61626
MOL001591	p-Amino-o-cresol	TAR02928	Trypsin-1	PRSS1	P07477
MOL001592	piperine	TAR00265	Tumor necrosis factor	TNF	P01375
MOL001592	piperine	TAR00351	Interleukin-6	IL6	P05231
MOL001592	piperine	TAR00404	Transient receptor potential cation channel subfamily V member 1	TRPV1	Q8NER1
MOL001592	piperine	TAR00408	Multidrug resistance protein 1	ABCB1	P08183
MOL001592	piperine	TAR00418	Interleukin-1 beta	IL1B	P01584
MOL001592	piperine	TAR00565	Amine oxidase [flavin-containing] B	MAOB	P27338
MOL001592	piperine	TAR00566	Amine oxidase [flavin-containing] A	MAOA	P21397
MOL001592	piperine	TAR03171	Interleukin-12 subunit beta	IL12B	P29460
MOL001592	piperine	TAR03202	Sterol O-acyltransferase 1	SOAT1	P35610
MOL001592	piperine	TAR00003	Nitric oxide synthase, inducible	NOS2	P35228
MOL001592	piperine	TAR00016	Muscarinic acetylcholine receptor M3	CHRM3	P20309
MOL001592	piperine	TAR00017	Prothrombin	F2	P00734
MOL001592	piperine	TAR00038	Muscarinic acetylcholine receptor M1	CHRM1	P11229
MOL001592	piperine	TAR00046	Estrogen receptor	ESR1	P03372
MOL001592	piperine	TAR00048	Androgen receptor	AR	P10275
MOL001592	piperine	TAR00070	Sodium channel protein type 5 subunit alpha	SCN5A	Q14524
MOL001592	piperine	TAR00078	Peroxisome proliferator-activated receptor gamma	PPARG	P37231
MOL001592	piperine	TAR00094	Prostaglandin G/H synthase 2	PTGS2	P35354
MOL001592	piperine	TAR00095	Nitric oxide synthase, endothelial	NOS3	P29474
MOL001592	piperine	TAR00117	Carbonic anhydrase 2	CA2	P00918
MOL001592	piperine	TAR00126	Alpha-2C adrenergic receptor	ADRA2C	P18825
MOL001592	piperine	TAR00165	Acetylcholinesterase	ACHE	P22303
MOL001592	piperine	TAR00172	cGMP-inhibited 3',5'-cyclic phosphodiesterase A	PDE3A	Q14432
MOL001592	piperine	TAR00216	Alpha-1B adrenergic receptor	ADRA1B	P35368
MOL001592	piperine	TAR00239	Sodium-dependent dopamine transporter	SLC6A3	Q01959
MOL001592	piperine	TAR00261	Beta-2 adrenergic receptor	ADRB2	P07550
MOL001592	piperine	TAR00332	Dipeptidyl peptidase 4	DPP4	P27487
MOL001592	piperine	TAR00422	Glycogen synthase kinase-3 beta	GSK3B	P49841
MOL001592	piperine	TAR00482	Cyclin-dependent kinase 2	CDK2	P24941
MOL001592	piperine	TAR00521	Leukotriene A-4 hydrolase	LTA4H	P09960
MOL001592	piperine	TAR02928	Trypsin-1	PRSS1	P07477
MOL001592	piperine	TAR03025	Cyclin-A2	CCNA2	P20248
MOL001594	Pisatin	TAR00003	Nitric oxide synthase, inducible	NOS2	P35228
MOL001594	Pisatin	TAR00006	Prostaglandin G/H synthase 1	PTGS1	P23219
MOL001594	Pisatin	TAR00017	Prothrombin	F2	P00734
MOL001594	Pisatin	TAR00046	Estrogen receptor	ESR1	P03372
MOL001594	Pisatin	TAR00048	Androgen receptor	AR	P10275
MOL001594	Pisatin	TAR00070	Sodium channel protein type 5 subunit alpha	SCN5A	Q14524
MOL001594	Pisatin	TAR00094	Prostaglandin G/H synthase 2	PTGS2	P35354
MOL001594	Pisatin	TAR00117	Carbonic anhydrase 2	CA2	P00918
MOL001594	Pisatin	TAR00165	Acetylcholinesterase	ACHE	P22303
MOL001594	Pisatin	TAR00229	Tyrosine-protein phosphatase non-receptor type 1	PTPN1	P18031
MOL001594	Pisatin	TAR00307	Estrogen receptor beta	ESR2	Q92731
MOL001594	Pisatin	TAR00332	Dipeptidyl peptidase 4	DPP4	P27487
MOL001594	Pisatin	TAR00422	Glycogen synthase kinase-3 beta	GSK3B	P49841
MOL001594	Pisatin	TAR00482	Cyclin-dependent kinase 2	CDK2	P24941
MOL001594	Pisatin	TAR00647	Serine/threonine-protein kinase Chk1	CHEK1	O14757
MOL001594	Pisatin	TAR02928	Trypsin-1	PRSS1	P07477
MOL001594	Pisatin	TAR02966	Serine/threonine-protein kinase pim-1	PIM1	P11309
MOL001594	Pisatin	TAR03025	Cyclin-A2	CCNA2	P20248
MOL001595	sesamol	TAR00003	Nitric oxide synthase, inducible	NOS2	P35228
MOL001595	sesamol	TAR00202	Aspartate aminotransferase, cytoplasmic	GOT1	P17174
MOL001595	sesamol	TAR00346	Urokinase-type plasminogen activator	PLAU	P00749
MOL001595	sesamol	TAR00434	Tissue-type plasminogen activator	PLAT	P00750
MOL001595	sesamol	TAR00568	Xanthine dehydrogenase/oxidase [Includes: Xanthine dehydrogenase	XDH	P47989
MOL001595	sesamol	TAR00735	Catalase	CAT	P04040
MOL001595	sesamol	TAR00727	Alcohol dehydrogenase 1C	ADH1C	P00326
MOL001595	sesamol	TAR01172	Lysozyme C	LYZ	P61626
MOL001595	sesamol	TAR02928	Trypsin-1	PRSS1	P07477
MOL001597	Tetradecahydro-1-methylphenanthrene	TAR00016	Muscarinic acetylcholine receptor M3	CHRM3	P20309
MOL001597	Tetradecahydro-1-methylphenanthrene	TAR00038	Muscarinic acetylcholine receptor M1	CHRM1	P11229
MOL001597	Tetradecahydro-1-methylphenanthrene	TAR00094	Prostaglandin G/H synthase 2	PTGS2	P35354
MOL001597	Tetradecahydro-1-methylphenanthrene	TAR00117	Carbonic anhydrase 2	CA2	P00918
MOL001597	Tetradecahydro-1-methylphenanthrene	TAR00158	Retinoic acid receptor RXR-alpha	RXRA	P19793
MOL001597	Tetradecahydro-1-methylphenanthrene	TAR00165	Acetylcholinesterase	ACHE	P22303
MOL001597	Tetradecahydro-1-methylphenanthrene	TAR00309	Gamma-aminobutyric acid receptor subunit alpha-1	GABRA1	P14867
MOL001597	Tetradecahydro-1-methylphenanthrene	TAR00332	Dipeptidyl peptidase 4	DPP4	P27487
MOL001597	Tetradecahydro-1-methylphenanthrene	TAR02928	Trypsin-1	PRSS1	P07477
MOL001597	Tetradecahydro-1-methylphenanthrene	TAR03276	Nuclear receptor coactivator 2	NCOA2	Q15596
MOL001601	1,2,5,6-tetrahydrotanshinone	TAR00003	Nitric oxide synthase, inducible	NOS2	P35228
MOL001601	1,2,5,6-tetrahydrotanshinone	TAR00006	Prostaglandin G/H synthase 1	PTGS1	P23219
MOL001601	1,2,5,6-tetrahydrotanshinone	TAR00007	D	DRD1	P21728
MOL001601	1,2,5,6-tetrahydrotanshinone	TAR00016	Muscarinic acetylcholine receptor M3	CHRM3	P20309
MOL001601	1,2,5,6-tetrahydrotanshinone	TAR00017	Prothrombin	F2	P00734
MOL001601	1,2,5,6-tetrahydrotanshinone	TAR00038	Muscarinic acetylcholine receptor M1	CHRM1	P11229
MOL001601	1,2,5,6-tetrahydrotanshinone	TAR00046	Estrogen receptor	ESR1	P03372
MOL001601	1,2,5,6-tetrahydrotanshinone	TAR00048	Androgen receptor	AR	P10275
MOL001601	1,2,5,6-tetrahydrotanshinone	TAR00070	Sodium channel protein type 5 subunit alpha	SCN5A	Q14524
MOL001601	1,2,5,6-tetrahydrotanshinone	TAR00078	Peroxisome proliferator-activated receptor gamma	PPARG	P37231
MOL001601	1,2,5,6-tetrahydrotanshinone	TAR00087	Muscarinic acetylcholine receptor M5	CHRM5	P08912
MOL001601	1,2,5,6-tetrahydrotanshinone	TAR00094	Prostaglandin G/H synthase 2	PTGS2	P35354
MOL001601	1,2,5,6-tetrahydrotanshinone	TAR00095	Nitric oxide synthase, endothelial	NOS3	P29474
MOL001601	1,2,5,6-tetrahydrotanshinone	TAR00113	5-hydroxytryptamine receptor 3A	HTR3A	P46098
MOL001601	1,2,5,6-tetrahydrotanshinone	TAR00117	Carbonic anhydrase 2	CA2	P00918
MOL001601	1,2,5,6-tetrahydrotanshinone	TAR00154	Muscarinic acetylcholine receptor M4	CHRM4	P08173
MOL001601	1,2,5,6-tetrahydrotanshinone	TAR00158	Retinoic acid receptor RXR-alpha	RXRA	P19793
MOL001601	1,2,5,6-tetrahydrotanshinone	TAR00163	Delta-type opioid receptor	OPRD1	P41143
MOL001601	1,2,5,6-tetrahydrotanshinone	TAR00165	Acetylcholinesterase	ACHE	P22303
MOL001601	1,2,5,6-tetrahydrotanshinone	TAR00172	cGMP-inhibited 3',5'-cyclic phosphodiesterase A	PDE3A	Q14432
MOL001601	1,2,5,6-tetrahydrotanshinone	TAR00175	5-hydroxytryptamine receptor 2A	HTR2A	P28223
MOL001601	1,2,5,6-tetrahydrotanshinone	TAR00191	Alpha-1A adrenergic receptor	ADRA1A	P35348
MOL001601	1,2,5,6-tetrahydrotanshinone	TAR00210	Muscarinic acetylcholine receptor M2	CHRM2	P08172
MOL001601	1,2,5,6-tetrahydrotanshinone	TAR00216	Alpha-1B adrenergic receptor	ADRA1B	P35368
MOL001601	1,2,5,6-tetrahydrotanshinone	TAR00229	Tyrosine-protein phosphatase non-receptor type 1	PTPN1	P18031
MOL001601	1,2,5,6-tetrahydrotanshinone	TAR00239	Sodium-dependent dopamine transporter	SLC6A3	Q01959
MOL001601	1,2,5,6-tetrahydrotanshinone	TAR00261	Beta-2 adrenergic receptor	ADRB2	P07550
MOL001601	1,2,5,6-tetrahydrotanshinone	TAR00272	Alpha-1D adrenergic receptor	ADRA1D	P25100
MOL001601	1,2,5,6-tetrahydrotanshinone	TAR00290	Sodium-dependent serotonin transporter	SLC6A4	P31645
MOL001601	1,2,5,6-tetrahydrotanshinone	TAR00299	Mu-type opioid receptor	OPRM1	P35372
MOL001601	1,2,5,6-tetrahydrotanshinone	TAR00307	Estrogen receptor beta	ESR2	Q92731
MOL001601	1,2,5,6-tetrahydrotanshinone	TAR00309	Gamma-aminobutyric acid receptor subunit alpha-1	GABRA1	P14867
MOL001601	1,2,5,6-tetrahydrotanshinone	TAR00332	Dipeptidyl peptidase 4	DPP4	P27487
MOL001601	1,2,5,6-tetrahydrotanshinone	TAR00402	Mitogen-activated protein kinase 14	MAPK14	Q16539
MOL001601	1,2,5,6-tetrahydrotanshinone	TAR00422	Glycogen synthase kinase-3 beta	GSK3B	P49841
MOL001601	1,2,5,6-tetrahydrotanshinone	TAR00482	Cyclin-dependent kinase 2	CDK2	P24941
MOL001601	1,2,5,6-tetrahydrotanshinone	TAR00581	Neuronal acetylcholine receptor subunit alpha-7	CHRNA7	P36544
MOL001601	1,2,5,6-tetrahydrotanshinone	TAR00647	Serine/threonine-protein kinase Chk1	CHEK1	O14757
MOL001601	1,2,5,6-tetrahydrotanshinone	TAR01201	Immunoglobulin heavy constant gamma 1	IGHG1	P01857
MOL001601	1,2,5,6-tetrahydrotanshinone	TAR02928	Trypsin-1	PRSS1	P07477
MOL001601	1,2,5,6-tetrahydrotanshinone	TAR02966	Serine/threonine-protein kinase pim-1	PIM1	P11309
MOL001601	1,2,5,6-tetrahydrotanshinone	TAR03025	Cyclin-A2	CCNA2	P20248
MOL001601	1,2,5,6-tetrahydrotanshinone	TAR03276	Nuclear receptor coactivator 2	NCOA2	Q15596
MOL001601	1,2,5,6-tetrahydrotanshinone	TAR03279	Nuclear receptor coactivator 1	NCOA1	Q15788
MOL001607	ZINC03982454	TAR00046	Estrogen receptor	ESR1	P03372
MOL001607	ZINC03982454	TAR00048	Androgen receptor	AR	P10275
MOL001607	ZINC03982454	TAR00209	Progesterone receptor	PGR	P06401
MOL001607	ZINC03982454	TAR03276	Nuclear receptor coactivator 2	NCOA2	Q15596
MOL001610	sylvatine	TAR00003	Nitric oxide synthase, inducible	NOS2	P35228
MOL001610	sylvatine	TAR00017	Prothrombin	F2	P00734
MOL001610	sylvatine	TAR00046	Estrogen receptor	ESR1	P03372
MOL001610	sylvatine	TAR00070	Sodium channel protein type 5 subunit alpha	SCN5A	Q14524
MOL001610	sylvatine	TAR00079	Coagulation factor X	F10	P00742
MOL001610	sylvatine	TAR00261	Beta-2 adrenergic receptor	ADRB2	P07550
MOL001611	dihydropiperlonguminine	TAR02889	Serum amyloid A-1 protein	SAA1	P0DJI8
MOL001612	PIPERONYLIC ACID	TAR00017	Prothrombin	F2	P00734
MOL001612	PIPERONYLIC ACID	TAR00094	Prostaglandin G/H synthase 2	PTGS2	P35354
MOL001612	PIPERONYLIC ACID	TAR00117	Carbonic anhydrase 2	CA2	P00918
MOL001612	PIPERONYLIC ACID	TAR00565	Amine oxidase [flavin-containing] B	MAOB	P27338
MOL001612	PIPERONYLIC ACID	TAR00566	Amine oxidase [flavin-containing] A	MAOA	P21397
MOL001612	PIPERONYLIC ACID	TAR02928	Trypsin-1	PRSS1	P07477
MOL001614	(E,E,E)-11-(1,3-Benzodioxol-5-yl)-N-(2-methylpropyl)-2,4,10-undecatrienenamide	TAR00003	Nitric oxide synthase, inducible	NOS2	P35228
MOL001614	(E,E,E)-11-(1,3-Benzodioxol-5-yl)-N-(2-methylpropyl)-2,4,10-undecatrienenamide	TAR00017	Prothrombin	F2	P00734
MOL001614	(E,E,E)-11-(1,3-Benzodioxol-5-yl)-N-(2-methylpropyl)-2,4,10-undecatrienenamide	TAR00046	Estrogen receptor	ESR1	P03372
MOL001614	(E,E,E)-11-(1,3-Benzodioxol-5-yl)-N-(2-methylpropyl)-2,4,10-undecatrienenamide	TAR00048	Androgen receptor	AR	P10275
MOL001614	(E,E,E)-11-(1,3-Benzodioxol-5-yl)-N-(2-methylpropyl)-2,4,10-undecatrienenamide	TAR00070	Sodium channel protein type 5 subunit alpha	SCN5A	Q14524
MOL001614	(E,E,E)-11-(1,3-Benzodioxol-5-yl)-N-(2-methylpropyl)-2,4,10-undecatrienenamide	TAR00078	Peroxisome proliferator-activated receptor gamma	PPARG	P37231
MOL001614	(E,E,E)-11-(1,3-Benzodioxol-5-yl)-N-(2-methylpropyl)-2,4,10-undecatrienenamide	TAR00095	Nitric oxide synthase, endothelial	NOS3	P29474
MOL001614	(E,E,E)-11-(1,3-Benzodioxol-5-yl)-N-(2-methylpropyl)-2,4,10-undecatrienenamide	TAR00216	Alpha-1B adrenergic receptor	ADRA1B	P35368
MOL001614	(E,E,E)-11-(1,3-Benzodioxol-5-yl)-N-(2-methylpropyl)-2,4,10-undecatrienenamide	TAR00261	Beta-2 adrenergic receptor	ADRB2	P07550
MOL001614	(E,E,E)-11-(1,3-Benzodioxol-5-yl)-N-(2-methylpropyl)-2,4,10-undecatrienenamide	TAR00332	Dipeptidyl peptidase 4	DPP4	P27487
MOL001614	(E,E,E)-11-(1,3-Benzodioxol-5-yl)-N-(2-methylpropyl)-2,4,10-undecatrienenamide	TAR03025	Cyclin-A2	CCNA2	P20248
MOL001616	1-[1-oxo-9(3, 4-methylenedioxyphenyl)-2E,8E-nonadienyl] pyrrolidine	TAR00016	Muscarinic acetylcholine receptor M3	CHRM3	P20309
MOL001616	1-[1-oxo-9(3, 4-methylenedioxyphenyl)-2E,8E-nonadienyl] pyrrolidine	TAR00017	Prothrombin	F2	P00734
MOL001616	1-[1-oxo-9(3, 4-methylenedioxyphenyl)-2E,8E-nonadienyl] pyrrolidine	TAR00038	Muscarinic acetylcholine receptor M1	CHRM1	P11229
MOL001616	1-[1-oxo-9(3, 4-methylenedioxyphenyl)-2E,8E-nonadienyl] pyrrolidine	TAR00046	Estrogen receptor	ESR1	P03372
MOL001616	1-[1-oxo-9(3, 4-methylenedioxyphenyl)-2E,8E-nonadienyl] pyrrolidine	TAR00048	Androgen receptor	AR	P10275
MOL001616	1-[1-oxo-9(3, 4-methylenedioxyphenyl)-2E,8E-nonadienyl] pyrrolidine	TAR00078	Peroxisome proliferator-activated receptor gamma	PPARG	P37231
MOL001616	1-[1-oxo-9(3, 4-methylenedioxyphenyl)-2E,8E-nonadienyl] pyrrolidine	TAR00126	Alpha-2C adrenergic receptor	ADRA2C	P18825
MOL001616	1-[1-oxo-9(3, 4-methylenedioxyphenyl)-2E,8E-nonadienyl] pyrrolidine	TAR00261	Beta-2 adrenergic receptor	ADRB2	P07550
MOL001616	1-[1-oxo-9(3, 4-methylenedioxyphenyl)-2E,8E-nonadienyl] pyrrolidine	TAR00332	Dipeptidyl peptidase 4	DPP4	P27487
MOL001616	1-[1-oxo-9(3, 4-methylenedioxyphenyl)-2E,8E-nonadienyl] pyrrolidine	TAR00482	Cyclin-dependent kinase 2	CDK2	P24941
MOL001616	1-[1-oxo-9(3, 4-methylenedioxyphenyl)-2E,8E-nonadienyl] pyrrolidine	TAR02928	Trypsin-1	PRSS1	P07477
MOL001621	l-undecylenyl-3,4-methylenedioxybenzene	TAR00003	Nitric oxide synthase, inducible	NOS2	P35228
		TAR00016	Muscarinic acetylcholine receptor M3	CHRM3	P20309
		TAR00017	Prothrombin	F2	P00734
		TAR00038	Muscarinic acetylcholine receptor M1	CHRM1	P11229
		TAR00046	Estrogen receptor	ESR1	P03372
		TAR00070	Sodium channel protein type 5 subunit alpha	SCN5A	Q14524
		TAR00095	Nitric oxide synthase, endothelial	NOS3	P29474
		TAR00126	Alpha-2C adrenergic receptor	ADRA2C	P18825
		TAR00158	Retinoic acid receptor RXR-alpha	RXRA	P19793
		TAR00186	Sodium-dependent noradrenaline transporter	SLC6A2	P23975
		TAR00216	Alpha-1B adrenergic receptor	ADRA1B	P35368
		TAR00239	Sodium-dependent dopamine transporter	SLC6A3	Q01959
		TAR00261	Beta-2 adrenergic receptor	ADRB2	P07550
		TAR00290	Sodium-dependent serotonin transporter	SLC6A4	P31645
		TAR00332	Dipeptidyl peptidase 4	DPP4	P27487
MOL002003	(-)-Caryophyllene oxide	TAR00016	Muscarinic acetylcholine receptor M3	CHRM3	P20309
MOL002003	(-)-Caryophyllene oxide	TAR00017	Prothrombin	F2	P00734
MOL002003	(-)-Caryophyllene oxide	TAR00038	Muscarinic acetylcholine receptor M1	CHRM1	P11229
MOL002003	(-)-Caryophyllene oxide	TAR00094	Prostaglandin G/H synthase 2	PTGS2	P35354
MOL002003	(-)-Caryophyllene oxide	TAR00165	Acetylcholinesterase	ACHE	P22303
MOL002003	(-)-Caryophyllene oxide	TAR00210	Muscarinic acetylcholine receptor M2	CHRM2	P08172
MOL002003	(-)-Caryophyllene oxide	TAR00216	Alpha-1B adrenergic receptor	ADRA1B	P35368
MOL002003	(-)-Caryophyllene oxide	TAR00309	Gamma-aminobutyric acid receptor subunit alpha-1	GABRA1	P14867
MOL002003	(-)-Caryophyllene oxide	TAR00332	Dipeptidyl peptidase 4	DPP4	P27487
MOL002003	(-)-Caryophyllene oxide	TAR03284	Gamma-aminobutyric acid receptor subunit alpha-6	GABRA6	Q16445

## Sheet: Doukou
The details of targets from compounds in Doukou
Molecule ID	Molecule Name	Target ID	Target Protein Name	Gene Symbol	Uniprot ID
MOL000006	luteolin	TAR00003	Nitric oxide synthase, inducible	NOS2	P35228
MOL000006	luteolin	TAR00011	Insulin receptor	INSR	P06213
MOL000006	luteolin	TAR00048	Androgen receptor	AR	P10275
MOL000006	luteolin	TAR00094	Prostaglandin G/H synthase 2	PTGS2	P35354
MOL000006	luteolin	TAR00238	72 kDa type IV collagenase	MMP2	P08253
MOL000006	luteolin	TAR00265	Tumor necrosis factor	TNF	P01375
MOL000006	luteolin	TAR00298	Epidermal growth factor receptor	EGFR	P00533
MOL000006	luteolin	TAR00349	Hepatocyte growth factor receptor	MET	P08581
MOL000006	luteolin	TAR00351	Interleukin-6	IL6	P05231
MOL000006	luteolin	TAR00353	Interstitial collagenase	MMP1	P03956
MOL000006	luteolin	TAR00354	Mitogen-activated protein kinase 1	MAPK1	P28482
MOL000006	luteolin	TAR00365	Interferon gamma	IFNG	P01579
MOL000006	luteolin	TAR00414	Transcription factor AP-1	JUN	P05412
MOL000006	luteolin	TAR00482	Cyclin-dependent kinase 2	CDK2	P24941
MOL000006	luteolin	TAR00568	Xanthine dehydrogenase/oxidase [Includes: Xanthine dehydrogenase	XDH	P47989
MOL000006	luteolin	TAR00573	Cyclin-dependent kinase 4	CDK4	P11802
MOL000006	luteolin	TAR00646	Cellular tumor antigen p53	TP53	P04637
MOL000006	luteolin	TAR00648	Amyloid-beta A4 protein	APP	P05067
MOL000006	luteolin	TAR00733	Glutathione S-transferase P	GSTP1	P09211
MOL000006	luteolin	TAR00740	Vascular endothelial growth factor A	VEGFA	P15692
MOL000006	luteolin	TAR01293	DNA topoisomerase 1	TOP1	P11387
MOL000006	luteolin	TAR02132	Heme oxygenase 1	HMOX1	P09601
MOL000006	luteolin	TAR02915	Retinoblastoma-associated protein	RB1	P06400
MOL000006	luteolin	TAR03575	Caspase-7	CASP7	P55210
MOL000006	luteolin	TAR03978	Interleukin-2	IL2	P60568
MOL000006	luteolin	TAR00006	Prostaglandin G/H synthase 1	PTGS1	P23219
MOL000006	luteolin	TAR00046	Estrogen receptor	ESR1	P03372
MOL000006	luteolin	TAR00078	Peroxisome proliferator-activated receptor gamma	PPARG	P37231
MOL000006	luteolin	TAR00117	Carbonic anhydrase 2	CA2	P00918
MOL000006	luteolin	TAR00229	Tyrosine-protein phosphatase non-receptor type 1	PTPN1	P18031
MOL000006	luteolin	TAR00307	Estrogen receptor beta	ESR2	Q92731
MOL000006	luteolin	TAR00332	Dipeptidyl peptidase 4	DPP4	P27487
MOL000006	luteolin	TAR00402	Mitogen-activated protein kinase 14	MAPK14	Q16539
MOL000006	luteolin	TAR00422	Glycogen synthase kinase-3 beta	GSK3B	P49841
MOL000006	luteolin	TAR00491	Phosphatidylinositol 4,5-bisphosphate 3-kinase catalytic subunit gamma isoform	PIK3CG	P48736
MOL000006	luteolin	TAR00699	cAMP-dependent protein kinase catalytic subunit alpha	PRKACA	P17612
MOL000006	luteolin	TAR02928	Trypsin-1	PRSS1	P07477
MOL000006	luteolin	TAR02966	Serine/threonine-protein kinase pim-1	PIM1	P11309
MOL000006	luteolin	TAR03025	Cyclin-A2	CCNA2	P20248
MOL000006	luteolin	TAR03276	Nuclear receptor coactivator 2	NCOA2	Q15596
MOL000019	D-Camphene	TAR00017	Prothrombin	F2	P00734
MOL000019	D-Camphene	TAR00037	Potassium voltage-gated channel subfamily H member 2	KCNH2	Q12809
MOL000019	D-Camphene	TAR00046	Estrogen receptor	ESR1	P03372
MOL000019	D-Camphene	TAR00048	Androgen receptor	AR	P10275
MOL000019	D-Camphene	TAR00070	Sodium channel protein type 5 subunit alpha	SCN5A	Q14524
MOL000019	D-Camphene	TAR00079	Coagulation factor X	F10	P00742
MOL000019	D-Camphene	TAR00094	Prostaglandin G/H synthase 2	PTGS2	P35354
MOL000019	D-Camphene	TAR00141	Gamma-aminobutyric acid receptor subunit alpha-2	GABRA2	P47869
MOL000019	D-Camphene	TAR00165	Acetylcholinesterase	ACHE	P22303
MOL000019	D-Camphene	TAR00307	Estrogen receptor beta	ESR2	Q92731
MOL000019	D-Camphene	TAR00309	Gamma-aminobutyric acid receptor subunit alpha-1	GABRA1	P14867
MOL000019	D-Camphene	TAR00332	Dipeptidyl peptidase 4	DPP4	P27487
MOL000019	D-Camphene	TAR00422	Glycogen synthase kinase-3 beta	GSK3B	P49841
MOL000019	D-Camphene	TAR02928	Trypsin-1	PRSS1	P07477
MOL000019	D-Camphene	TAR02966	Serine/threonine-protein kinase pim-1	PIM1	P11309
MOL000019	D-Camphene	TAR03276	Nuclear receptor coactivator 2	NCOA2	Q15596
MOL000019	D-Camphene	TAR03727	Calcium-activated potassium channel subunit alpha-1	KCNMA1	Q12791
MOL000086	(24S)-5beta-Stigmastan-3beta-ol	TAR00046	Estrogen receptor	ESR1	P03372
MOL000086	(24S)-5beta-Stigmastan-3beta-ol	TAR00048	Androgen receptor	AR	P10275
MOL000086	(24S)-5beta-Stigmastan-3beta-ol	TAR00209	Progesterone receptor	PGR	P06401
MOL000098	quercetin	TAR00003	Nitric oxide synthase, inducible	NOS2	P35228
MOL000098	quercetin	TAR00006	Prostaglandin G/H synthase 1	PTGS1	P23219
MOL000098	quercetin	TAR00011	Insulin receptor	INSR	P06213
MOL000098	quercetin	TAR00046	Estrogen receptor	ESR1	P03372
MOL000098	quercetin	TAR00048	Androgen receptor	AR	P10275
MOL000098	quercetin	TAR00086	Apoptosis regulator Bcl-2	BCL2	P10415
MOL000098	quercetin	TAR00088	Arachidonate 5-lipoxygenase	ALOX5	P09917
MOL000098	quercetin	TAR00094	Prostaglandin G/H synthase 2	PTGS2	P35354
MOL000098	quercetin	TAR00153	Ornithine decarboxylase	ODC1	P11926
MOL000098	quercetin	TAR00231	Acetyl-CoA carboxylase 1	ACACA	Q13085
MOL000098	quercetin	TAR00238	72 kDa type IV collagenase	MMP2	P08253
MOL000098	quercetin	TAR00265	Tumor necrosis factor	TNF	P01375
MOL000098	quercetin	TAR00298	Epidermal growth factor receptor	EGFR	P00533
MOL000098	quercetin	TAR00307	Estrogen receptor beta	ESR2	Q92731
MOL000098	quercetin	TAR00318	Maltase-glucoamylase, intestinal [Includes: Maltase	MGAM	O43451
MOL000098	quercetin	TAR00346	Urokinase-type plasminogen activator	PLAU	P00749
MOL000098	quercetin	TAR00351	Interleukin-6	IL6	P05231
MOL000098	quercetin	TAR00353	Interstitial collagenase	MMP1	P03956
MOL000098	quercetin	TAR00354	Mitogen-activated protein kinase 1	MAPK1	P28482
MOL000098	quercetin	TAR00357	Serum paraoxonase/arylesterase 1	PON1	P27169
MOL000098	quercetin	TAR00363	Cathepsin D	CTSD	P07339
MOL000098	quercetin	TAR00365	Interferon gamma	IFNG	P01579
MOL000098	quercetin	TAR00414	Transcription factor AP-1	JUN	P05412
MOL000098	quercetin	TAR00417	C-C motif chemokine 2	CCL2	P13500
MOL000098	quercetin	TAR00418	Interleukin-1 beta	IL1B	P01584
MOL000098	quercetin	TAR00422	Glycogen synthase kinase-3 beta	GSK3B	P49841
MOL000098	quercetin	TAR00427	E-selectin	SELE	P16581
MOL000098	quercetin	TAR00428	Myeloperoxidase	MPO	P05164
MOL000098	quercetin	TAR00431	Cyclin-dependent kinase 1	CDK1	P06493
MOL000098	quercetin	TAR00434	Tissue-type plasminogen activator	PLAT	P00750
MOL000098	quercetin	TAR00436	Gap junction alpha-1 protein	GJA1	P17302
MOL000098	quercetin	TAR00440	Vascular cell adhesion protein 1	VCAM1	P19320
MOL000098	quercetin	TAR00457	Thrombomodulin	THBD	P07204
MOL000098	quercetin	TAR00466	Tissue factor	F3	P13726
MOL000098	quercetin	TAR00470	NAD	NQO1	P15559
MOL000098	quercetin	TAR00568	Xanthine dehydrogenase/oxidase [Includes: Xanthine dehydrogenase	XDH	P47989
MOL000098	quercetin	TAR00593	Prostaglandin E2 receptor EP3 subtype	PTGER3	P43115
MOL000098	quercetin	TAR00597	Superoxide dismutase [Cu-Zn]	SOD1	P00441
MOL000098	quercetin	TAR00621	Cytochrome P450 3A4	CYP3A4	P08684
MOL000098	quercetin	TAR00646	Cellular tumor antigen p53	TP53	P04637
MOL000098	quercetin	TAR00724	Cytochrome P450 1A2	CYP1A2	P05177
MOL000098	quercetin	TAR00731	Collagen alpha-1	COL1A1	P02452
MOL000098	quercetin	TAR00733	Glutathione S-transferase P	GSTP1	P09211
MOL000098	quercetin	TAR00734	Pro-epidermal growth factor	EGF	P01133
MOL000098	quercetin	TAR00740	Vascular endothelial growth factor A	VEGFA	P15692
MOL000098	quercetin	TAR00744	NADPH--cytochrome P450 reductase	POR	P16435
MOL000098	quercetin	TAR00781	Estrogen sulfotransferase	SULT1E1	P49888
MOL000098	quercetin	TAR01293	DNA topoisomerase 1	TOP1	P11387
MOL000098	quercetin	TAR02132	Heme oxygenase 1	HMOX1	P09601
MOL000098	quercetin	TAR02885	Collagen alpha-1	COL3A1	P02461
MOL000098	quercetin	TAR02915	Retinoblastoma-associated protein	RB1	P06400
MOL000098	quercetin	TAR02952	Glutathione S-transferase Mu 1	GSTM1	P09488
MOL000098	quercetin	TAR02963	Endoplasmic reticulum chaperone BiP	HSPA5	P11021
MOL000098	quercetin	TAR02998	Prostatic acid phosphatase	ACPP	P15309
MOL000098	quercetin	TAR03204	Aryl hydrocarbon receptor	AHR	P35869
MOL000098	quercetin	TAR03688	Glutathione S-transferase Mu 2	GSTM2	P28161
MOL000098	quercetin	TAR03978	Interleukin-2	IL2	P60568
MOL000098	quercetin	TAR00017	Prothrombin	F2	P00734
MOL000098	quercetin	TAR00037	Potassium voltage-gated channel subfamily H member 2	KCNH2	Q12809
MOL000098	quercetin	TAR00070	Sodium channel protein type 5 subunit alpha	SCN5A	Q14524
MOL000098	quercetin	TAR00078	Peroxisome proliferator-activated receptor gamma	PPARG	P37231
MOL000098	quercetin	TAR00079	Coagulation factor X	F10	P00742
MOL000098	quercetin	TAR00095	Nitric oxide synthase, endothelial	NOS3	P29474
MOL000098	quercetin	TAR00117	Carbonic anhydrase 2	CA2	P00918
MOL000098	quercetin	TAR00123	Coagulation factor VII	F7	P08709
MOL000098	quercetin	TAR00158	Retinoic acid receptor RXR-alpha	RXRA	P19793
MOL000098	quercetin	TAR00165	Acetylcholinesterase	ACHE	P22303
MOL000098	quercetin	TAR00229	Tyrosine-protein phosphatase non-receptor type 1	PTPN1	P18031
MOL000098	quercetin	TAR00261	Beta-2 adrenergic receptor	ADRB2	P07550
MOL000098	quercetin	TAR00288	Aldose reductase	AKR1B1	P15121
MOL000098	quercetin	TAR00309	Gamma-aminobutyric acid receptor subunit alpha-1	GABRA1	P14867
MOL000098	quercetin	TAR00332	Dipeptidyl peptidase 4	DPP4	P27487
MOL000098	quercetin	TAR00402	Mitogen-activated protein kinase 14	MAPK14	Q16539
MOL000098	quercetin	TAR00441	Stromelysin-1	MMP3	P08254
MOL000098	quercetin	TAR00482	Cyclin-dependent kinase 2	CDK2	P24941
MOL000098	quercetin	TAR00491	Phosphatidylinositol 4,5-bisphosphate 3-kinase catalytic subunit gamma isoform	PIK3CG	P48736
MOL000098	quercetin	TAR00499	Endoribonuclease LACTB2	LACTB2	Q53H82
MOL000098	quercetin	TAR00565	Amine oxidase [flavin-containing] B	MAOB	P27338
MOL000098	quercetin	TAR00647	Serine/threonine-protein kinase Chk1	CHEK1	O14757
MOL000098	quercetin	TAR00699	cAMP-dependent protein kinase catalytic subunit alpha	PRKACA	P17612
MOL000098	quercetin	TAR02928	Trypsin-1	PRSS1	P07477
MOL000098	quercetin	TAR02966	Serine/threonine-protein kinase pim-1	PIM1	P11309
MOL000098	quercetin	TAR03025	Cyclin-A2	CCNA2	P20248
MOL000098	quercetin	TAR03276	Nuclear receptor coactivator 2	NCOA2	Q15596
MOL000024	alpha-humulene	TAR00265	Tumor necrosis factor	TNF	P01375
MOL000024	alpha-humulene	TAR00418	Interleukin-1 beta	IL1B	P01584
MOL000024	alpha-humulene	TAR00017	Prothrombin	F2	P00734
MOL000024	alpha-humulene	TAR00094	Prostaglandin G/H synthase 2	PTGS2	P35354
MOL000024	alpha-humulene	TAR00095	Nitric oxide synthase, endothelial	NOS3	P29474
MOL000024	alpha-humulene	TAR00099	Renin	REN	P00797
MOL000024	alpha-humulene	TAR00117	Carbonic anhydrase 2	CA2	P00918
MOL000024	alpha-humulene	TAR00165	Acetylcholinesterase	ACHE	P22303
MOL000024	alpha-humulene	TAR00186	Sodium-dependent noradrenaline transporter	SLC6A2	P23975
MOL000024	alpha-humulene	TAR00309	Gamma-aminobutyric acid receptor subunit alpha-1	GABRA1	P14867
MOL000024	alpha-humulene	TAR00332	Dipeptidyl peptidase 4	DPP4	P27487
MOL000024	alpha-humulene	TAR00726	Alcohol dehydrogenase 1B	ADH1B	P00325
MOL000024	alpha-humulene	TAR00727	Alcohol dehydrogenase 1C	ADH1C	P00326
MOL000024	alpha-humulene	TAR02928	Trypsin-1	PRSS1	P07477
MOL000024	alpha-humulene	TAR03276	Nuclear receptor coactivator 2	NCOA2	Q15596
MOL000130	CAM	TAR00038	Muscarinic acetylcholine receptor M1	CHRM1	P11229
MOL000130	CAM	TAR00141	Gamma-aminobutyric acid receptor subunit alpha-2	GABRA2	P47869
MOL000130	CAM	TAR00210	Muscarinic acetylcholine receptor M2	CHRM2	P08172
MOL000130	CAM	TAR02928	Trypsin-1	PRSS1	P07477
MOL000105	protocatechuic acid	TAR00318	Maltase-glucoamylase, intestinal [Includes: Maltase	MGAM	O43451
MOL000105	protocatechuic acid	TAR00006	Prostaglandin G/H synthase 1	PTGS1	P23219
MOL000105	protocatechuic acid	TAR00017	Prothrombin	F2	P00734
MOL000105	protocatechuic acid	TAR00088	Arachidonate 5-lipoxygenase	ALOX5	P09917
MOL000105	protocatechuic acid	TAR00094	Prostaglandin G/H synthase 2	PTGS2	P35354
MOL000105	protocatechuic acid	TAR00117	Carbonic anhydrase 2	CA2	P00918
MOL000105	protocatechuic acid	TAR00165	Acetylcholinesterase	ACHE	P22303
MOL000105	protocatechuic acid	TAR00482	Cyclin-dependent kinase 2	CDK2	P24941
MOL000105	protocatechuic acid	TAR00499	Endoribonuclease LACTB2	LACTB2	Q53H82
MOL000105	protocatechuic acid	TAR00565	Amine oxidase [flavin-containing] B	MAOB	P27338
MOL000105	protocatechuic acid	TAR00727	Alcohol dehydrogenase 1C	ADH1C	P00326
MOL000105	protocatechuic acid	TAR01172	Lysozyme C	LYZ	P61626
MOL000105	protocatechuic acid	TAR02928	Trypsin-1	PRSS1	P07477
MOL000105	protocatechuic acid	TAR03952	Trypsin-3	PRSS3	P35030
MOL000224	(4E,6E)-1,7-bis(3,4-dihydroxyphenyl)hepta-4,6-dien-3-one	TAR00003	Nitric oxide synthase, inducible	NOS2	P35228
MOL000224	(4E,6E)-1,7-bis(3,4-dihydroxyphenyl)hepta-4,6-dien-3-one	TAR00017	Prothrombin	F2	P00734
MOL000224	(4E,6E)-1,7-bis(3,4-dihydroxyphenyl)hepta-4,6-dien-3-one	TAR00046	Estrogen receptor	ESR1	P03372
MOL000224	(4E,6E)-1,7-bis(3,4-dihydroxyphenyl)hepta-4,6-dien-3-one	TAR00048	Androgen receptor	AR	P10275
MOL000224	(4E,6E)-1,7-bis(3,4-dihydroxyphenyl)hepta-4,6-dien-3-one	TAR00078	Peroxisome proliferator-activated receptor gamma	PPARG	P37231
MOL000224	(4E,6E)-1,7-bis(3,4-dihydroxyphenyl)hepta-4,6-dien-3-one	TAR00094	Prostaglandin G/H synthase 2	PTGS2	P35354
MOL000224	(4E,6E)-1,7-bis(3,4-dihydroxyphenyl)hepta-4,6-dien-3-one	TAR00261	Beta-2 adrenergic receptor	ADRB2	P07550
MOL000224	(4E,6E)-1,7-bis(3,4-dihydroxyphenyl)hepta-4,6-dien-3-one	TAR00307	Estrogen receptor beta	ESR2	Q92731
MOL000224	(4E,6E)-1,7-bis(3,4-dihydroxyphenyl)hepta-4,6-dien-3-one	TAR00332	Dipeptidyl peptidase 4	DPP4	P27487
MOL000224	(4E,6E)-1,7-bis(3,4-dihydroxyphenyl)hepta-4,6-dien-3-one	TAR00402	Mitogen-activated protein kinase 14	MAPK14	Q16539
MOL000224	(4E,6E)-1,7-bis(3,4-dihydroxyphenyl)hepta-4,6-dien-3-one	TAR00422	Glycogen synthase kinase-3 beta	GSK3B	P49841
MOL000224	(4E,6E)-1,7-bis(3,4-dihydroxyphenyl)hepta-4,6-dien-3-one	TAR00482	Cyclin-dependent kinase 2	CDK2	P24941
MOL000224	(4E,6E)-1,7-bis(3,4-dihydroxyphenyl)hepta-4,6-dien-3-one	TAR00647	Serine/threonine-protein kinase Chk1	CHEK1	O14757
MOL000224	(4E,6E)-1,7-bis(3,4-dihydroxyphenyl)hepta-4,6-dien-3-one	TAR00699	cAMP-dependent protein kinase catalytic subunit alpha	PRKACA	P17612
MOL000224	(4E,6E)-1,7-bis(3,4-dihydroxyphenyl)hepta-4,6-dien-3-one	TAR02928	Trypsin-1	PRSS1	P07477
MOL000224	(4E,6E)-1,7-bis(3,4-dihydroxyphenyl)hepta-4,6-dien-3-one	TAR02966	Serine/threonine-protein kinase pim-1	PIM1	P11309
MOL000224	(4E,6E)-1,7-bis(3,4-dihydroxyphenyl)hepta-4,6-dien-3-one	TAR03025	Cyclin-A2	CCNA2	P20248
MOL000118	(L)-alpha-Terpineol	TAR00003	Nitric oxide synthase, inducible	NOS2	P35228
MOL000118	(L)-alpha-Terpineol	TAR00006	Prostaglandin G/H synthase 1	PTGS1	P23219
MOL000118	(L)-alpha-Terpineol	TAR00016	Muscarinic acetylcholine receptor M3	CHRM3	P20309
MOL000118	(L)-alpha-Terpineol	TAR00017	Prothrombin	F2	P00734
MOL000118	(L)-alpha-Terpineol	TAR00038	Muscarinic acetylcholine receptor M1	CHRM1	P11229
MOL000118	(L)-alpha-Terpineol	TAR00046	Estrogen receptor	ESR1	P03372
MOL000118	(L)-alpha-Terpineol	TAR00048	Androgen receptor	AR	P10275
MOL000118	(L)-alpha-Terpineol	TAR00070	Sodium channel protein type 5 subunit alpha	SCN5A	Q14524
MOL000118	(L)-alpha-Terpineol	TAR00078	Peroxisome proliferator-activated receptor gamma	PPARG	P37231
MOL000118	(L)-alpha-Terpineol	TAR00079	Coagulation factor X	F10	P00742
MOL000118	(L)-alpha-Terpineol	TAR00094	Prostaglandin G/H synthase 2	PTGS2	P35354
MOL000118	(L)-alpha-Terpineol	TAR00095	Nitric oxide synthase, endothelial	NOS3	P29474
MOL000118	(L)-alpha-Terpineol	TAR00141	Gamma-aminobutyric acid receptor subunit alpha-2	GABRA2	P47869
MOL000118	(L)-alpha-Terpineol	TAR00165	Acetylcholinesterase	ACHE	P22303
MOL000118	(L)-alpha-Terpineol	TAR00181	Gamma-aminobutyric acid receptor subunit alpha-5	GABRA5	P31644
MOL000118	(L)-alpha-Terpineol	TAR00186	Sodium-dependent noradrenaline transporter	SLC6A2	P23975
MOL000118	(L)-alpha-Terpineol	TAR00191	Alpha-1A adrenergic receptor	ADRA1A	P35348
MOL000118	(L)-alpha-Terpineol	TAR00200	Gamma-aminobutyric acid receptor subunit alpha-3	GABRA3	P34903
MOL000118	(L)-alpha-Terpineol	TAR00210	Muscarinic acetylcholine receptor M2	CHRM2	P08172
MOL000118	(L)-alpha-Terpineol	TAR00216	Alpha-1B adrenergic receptor	ADRA1B	P35368
MOL000118	(L)-alpha-Terpineol	TAR00239	Sodium-dependent dopamine transporter	SLC6A3	Q01959
MOL000118	(L)-alpha-Terpineol	TAR00307	Estrogen receptor beta	ESR2	Q92731
MOL000118	(L)-alpha-Terpineol	TAR00309	Gamma-aminobutyric acid receptor subunit alpha-1	GABRA1	P14867
MOL000118	(L)-alpha-Terpineol	TAR00332	Dipeptidyl peptidase 4	DPP4	P27487
MOL000118	(L)-alpha-Terpineol	TAR00422	Glycogen synthase kinase-3 beta	GSK3B	P49841
MOL000118	(L)-alpha-Terpineol	TAR00647	Serine/threonine-protein kinase Chk1	CHEK1	O14757
MOL000118	(L)-alpha-Terpineol	TAR01201	Immunoglobulin heavy constant gamma 1	IGHG1	P01857
MOL000118	(L)-alpha-Terpineol	TAR02928	Trypsin-1	PRSS1	P07477
MOL000118	(L)-alpha-Terpineol	TAR02966	Serine/threonine-protein kinase pim-1	PIM1	P11309
MOL000118	(L)-alpha-Terpineol	TAR03025	Cyclin-A2	CCNA2	P20248
MOL000118	(L)-alpha-Terpineol	TAR03276	Nuclear receptor coactivator 2	NCOA2	Q15596
MOL000118	(L)-alpha-Terpineol	TAR03284	Gamma-aminobutyric acid receptor subunit alpha-6	GABRA6	Q16445
MOL000118	(L)-alpha-Terpineol	TAR03727	Calcium-activated potassium channel subunit alpha-1	KCNMA1	Q12791
MOL000227	Alnusone	TAR00017	Prothrombin	F2	P00734
MOL000227	Alnusone	TAR00038	Muscarinic acetylcholine receptor M1	CHRM1	P11229
MOL000227	Alnusone	TAR00046	Estrogen receptor	ESR1	P03372
MOL000227	Alnusone	TAR00126	Alpha-2C adrenergic receptor	ADRA2C	P18825
MOL000227	Alnusone	TAR00216	Alpha-1B adrenergic receptor	ADRA1B	P35368
MOL000227	Alnusone	TAR00261	Beta-2 adrenergic receptor	ADRB2	P07550
MOL000227	Alnusone	TAR00332	Dipeptidyl peptidase 4	DPP4	P27487
MOL000227	Alnusone	TAR00565	Amine oxidase [flavin-containing] B	MAOB	P27338
MOL000227	Alnusone	TAR02928	Trypsin-1	PRSS1	P07477
MOL000228	(2R)-7-hydroxy-5-methoxy-2-phenylchroman-4-one	TAR00003	Nitric oxide synthase, inducible	NOS2	P35228
MOL000228	(2R)-7-hydroxy-5-methoxy-2-phenylchroman-4-one	TAR00006	Prostaglandin G/H synthase 1	PTGS1	P23219
MOL000228	(2R)-7-hydroxy-5-methoxy-2-phenylchroman-4-one	TAR00007	D	DRD1	P21728
MOL000228	(2R)-7-hydroxy-5-methoxy-2-phenylchroman-4-one	TAR00016	Muscarinic acetylcholine receptor M3	CHRM3	P20309
MOL000228	(2R)-7-hydroxy-5-methoxy-2-phenylchroman-4-one	TAR00038	Muscarinic acetylcholine receptor M1	CHRM1	P11229
MOL000228	(2R)-7-hydroxy-5-methoxy-2-phenylchroman-4-one	TAR00046	Estrogen receptor	ESR1	P03372
MOL000228	(2R)-7-hydroxy-5-methoxy-2-phenylchroman-4-one	TAR00048	Androgen receptor	AR	P10275
MOL000228	(2R)-7-hydroxy-5-methoxy-2-phenylchroman-4-one	TAR00070	Sodium channel protein type 5 subunit alpha	SCN5A	Q14524
MOL000228	(2R)-7-hydroxy-5-methoxy-2-phenylchroman-4-one	TAR00078	Peroxisome proliferator-activated receptor gamma	PPARG	P37231
MOL000228	(2R)-7-hydroxy-5-methoxy-2-phenylchroman-4-one	TAR00094	Prostaglandin G/H synthase 2	PTGS2	P35354
MOL000228	(2R)-7-hydroxy-5-methoxy-2-phenylchroman-4-one	TAR00117	Carbonic anhydrase 2	CA2	P00918
MOL000228	(2R)-7-hydroxy-5-methoxy-2-phenylchroman-4-one	TAR00158	Retinoic acid receptor RXR-alpha	RXRA	P19793
MOL000228	(2R)-7-hydroxy-5-methoxy-2-phenylchroman-4-one	TAR00172	cGMP-inhibited 3',5'-cyclic phosphodiesterase A	PDE3A	Q14432
MOL000228	(2R)-7-hydroxy-5-methoxy-2-phenylchroman-4-one	TAR00191	Alpha-1A adrenergic receptor	ADRA1A	P35348
MOL000228	(2R)-7-hydroxy-5-methoxy-2-phenylchroman-4-one	TAR00216	Alpha-1B adrenergic receptor	ADRA1B	P35368
MOL000228	(2R)-7-hydroxy-5-methoxy-2-phenylchroman-4-one	TAR00229	Tyrosine-protein phosphatase non-receptor type 1	PTPN1	P18031
MOL000228	(2R)-7-hydroxy-5-methoxy-2-phenylchroman-4-one	TAR00239	Sodium-dependent dopamine transporter	SLC6A3	Q01959
MOL000228	(2R)-7-hydroxy-5-methoxy-2-phenylchroman-4-one	TAR00261	Beta-2 adrenergic receptor	ADRB2	P07550
MOL000228	(2R)-7-hydroxy-5-methoxy-2-phenylchroman-4-one	TAR00290	Sodium-dependent serotonin transporter	SLC6A4	P31645
MOL000228	(2R)-7-hydroxy-5-methoxy-2-phenylchroman-4-one	TAR00307	Estrogen receptor beta	ESR2	Q92731
MOL000228	(2R)-7-hydroxy-5-methoxy-2-phenylchroman-4-one	TAR00309	Gamma-aminobutyric acid receptor subunit alpha-1	GABRA1	P14867
MOL000228	(2R)-7-hydroxy-5-methoxy-2-phenylchroman-4-one	TAR00332	Dipeptidyl peptidase 4	DPP4	P27487
MOL000228	(2R)-7-hydroxy-5-methoxy-2-phenylchroman-4-one	TAR00402	Mitogen-activated protein kinase 14	MAPK14	Q16539
MOL000228	(2R)-7-hydroxy-5-methoxy-2-phenylchroman-4-one	TAR00422	Glycogen synthase kinase-3 beta	GSK3B	P49841
MOL000228	(2R)-7-hydroxy-5-methoxy-2-phenylchroman-4-one	TAR00482	Cyclin-dependent kinase 2	CDK2	P24941
MOL000228	(2R)-7-hydroxy-5-methoxy-2-phenylchroman-4-one	TAR00491	Phosphatidylinositol 4,5-bisphosphate 3-kinase catalytic subunit gamma isoform	PIK3CG	P48736
MOL000228	(2R)-7-hydroxy-5-methoxy-2-phenylchroman-4-one	TAR00565	Amine oxidase [flavin-containing] B	MAOB	P27338
MOL000228	(2R)-7-hydroxy-5-methoxy-2-phenylchroman-4-one	TAR00581	Neuronal acetylcholine receptor subunit alpha-7	CHRNA7	P36544
MOL000228	(2R)-7-hydroxy-5-methoxy-2-phenylchroman-4-one	TAR00647	Serine/threonine-protein kinase Chk1	CHEK1	O14757
MOL000228	(2R)-7-hydroxy-5-methoxy-2-phenylchroman-4-one	TAR00699	cAMP-dependent protein kinase catalytic subunit alpha	PRKACA	P17612
MOL000228	(2R)-7-hydroxy-5-methoxy-2-phenylchroman-4-one	TAR02928	Trypsin-1	PRSS1	P07477
MOL000228	(2R)-7-hydroxy-5-methoxy-2-phenylchroman-4-one	TAR02966	Serine/threonine-protein kinase pim-1	PIM1	P11309
MOL000228	(2R)-7-hydroxy-5-methoxy-2-phenylchroman-4-one	TAR03025	Cyclin-A2	CCNA2	P20248
MOL000228	(2R)-7-hydroxy-5-methoxy-2-phenylchroman-4-one	TAR03586	cAMP-dependent protein kinase inhibitor alpha	PKIA	P61925
MOL000229	cardamomin	TAR00003	Nitric oxide synthase, inducible	NOS2	P35228
MOL000229	cardamomin	TAR00094	Prostaglandin G/H synthase 2	PTGS2	P35354
MOL000229	cardamomin	TAR00006	Prostaglandin G/H synthase 1	PTGS1	P23219
MOL000229	cardamomin	TAR00017	Prothrombin	F2	P00734
MOL000229	cardamomin	TAR00046	Estrogen receptor	ESR1	P03372
MOL000229	cardamomin	TAR00048	Androgen receptor	AR	P10275
MOL000229	cardamomin	TAR00078	Peroxisome proliferator-activated receptor gamma	PPARG	P37231
MOL000229	cardamomin	TAR00117	Carbonic anhydrase 2	CA2	P00918
MOL000229	cardamomin	TAR00158	Retinoic acid receptor RXR-alpha	RXRA	P19793
MOL000229	cardamomin	TAR00172	cGMP-inhibited 3',5'-cyclic phosphodiesterase A	PDE3A	Q14432
MOL000229	cardamomin	TAR00261	Beta-2 adrenergic receptor	ADRB2	P07550
MOL000229	cardamomin	TAR00288	Aldose reductase	AKR1B1	P15121
MOL000229	cardamomin	TAR00290	Sodium-dependent serotonin transporter	SLC6A4	P31645
MOL000229	cardamomin	TAR00307	Estrogen receptor beta	ESR2	Q92731
MOL000229	cardamomin	TAR00332	Dipeptidyl peptidase 4	DPP4	P27487
MOL000229	cardamomin	TAR00402	Mitogen-activated protein kinase 14	MAPK14	Q16539
MOL000229	cardamomin	TAR00422	Glycogen synthase kinase-3 beta	GSK3B	P49841
MOL000229	cardamomin	TAR00482	Cyclin-dependent kinase 2	CDK2	P24941
MOL000229	cardamomin	TAR00499	Endoribonuclease LACTB2	LACTB2	Q53H82
MOL000229	cardamomin	TAR00565	Amine oxidase [flavin-containing] B	MAOB	P27338
MOL000229	cardamomin	TAR00647	Serine/threonine-protein kinase Chk1	CHEK1	O14757
MOL000229	cardamomin	TAR00699	cAMP-dependent protein kinase catalytic subunit alpha	PRKACA	P17612
MOL000229	cardamomin	TAR02928	Trypsin-1	PRSS1	P07477
MOL000229	cardamomin	TAR02966	Serine/threonine-protein kinase pim-1	PIM1	P11309
MOL000229	cardamomin	TAR03025	Cyclin-A2	CCNA2	P20248
MOL000229	cardamomin	TAR03586	cAMP-dependent protein kinase inhibitor alpha	PKIA	P61925
MOL000229	cardamomin	TAR03758	#N/A	HBA1	#N/A
MOL000230	Pinocembrin	TAR00003	Nitric oxide synthase, inducible	NOS2	P35228
MOL000230	Pinocembrin	TAR00006	Prostaglandin G/H synthase 1	PTGS1	P23219
MOL000230	Pinocembrin	TAR00038	Muscarinic acetylcholine receptor M1	CHRM1	P11229
MOL000230	Pinocembrin	TAR00046	Estrogen receptor	ESR1	P03372
MOL000230	Pinocembrin	TAR00048	Androgen receptor	AR	P10275
MOL000230	Pinocembrin	TAR00078	Peroxisome proliferator-activated receptor gamma	PPARG	P37231
MOL000230	Pinocembrin	TAR00094	Prostaglandin G/H synthase 2	PTGS2	P35354
MOL000230	Pinocembrin	TAR00117	Carbonic anhydrase 2	CA2	P00918
MOL000230	Pinocembrin	TAR00158	Retinoic acid receptor RXR-alpha	RXRA	P19793
MOL000230	Pinocembrin	TAR00172	cGMP-inhibited 3',5'-cyclic phosphodiesterase A	PDE3A	Q14432
MOL000230	Pinocembrin	TAR00261	Beta-2 adrenergic receptor	ADRB2	P07550
MOL000230	Pinocembrin	TAR00307	Estrogen receptor beta	ESR2	Q92731
MOL000230	Pinocembrin	TAR00332	Dipeptidyl peptidase 4	DPP4	P27487
MOL000230	Pinocembrin	TAR00402	Mitogen-activated protein kinase 14	MAPK14	Q16539
MOL000230	Pinocembrin	TAR00422	Glycogen synthase kinase-3 beta	GSK3B	P49841
MOL000230	Pinocembrin	TAR00482	Cyclin-dependent kinase 2	CDK2	P24941
MOL000230	Pinocembrin	TAR00491	Phosphatidylinositol 4,5-bisphosphate 3-kinase catalytic subunit gamma isoform	PIK3CG	P48736
MOL000230	Pinocembrin	TAR00647	Serine/threonine-protein kinase Chk1	CHEK1	O14757
MOL000230	Pinocembrin	TAR00699	cAMP-dependent protein kinase catalytic subunit alpha	PRKACA	P17612
MOL000230	Pinocembrin	TAR02928	Trypsin-1	PRSS1	P07477
MOL000230	Pinocembrin	TAR02966	Serine/threonine-protein kinase pim-1	PIM1	P11309
MOL000230	Pinocembrin	TAR03025	Cyclin-A2	CCNA2	P20248
MOL000230	Pinocembrin	TAR03586	cAMP-dependent protein kinase inhibitor alpha	PKIA	P61925
MOL000231	trans-1,7-Diphenyl-1hepten-5-ol	TAR00017	Prothrombin	F2	P00734
MOL000231	trans-1,7-Diphenyl-1hepten-5-ol	TAR00038	Muscarinic acetylcholine receptor M1	CHRM1	P11229
MOL000231	trans-1,7-Diphenyl-1hepten-5-ol	TAR00046	Estrogen receptor	ESR1	P03372
MOL000231	trans-1,7-Diphenyl-1hepten-5-ol	TAR00261	Beta-2 adrenergic receptor	ADRB2	P07550
MOL000231	trans-1,7-Diphenyl-1hepten-5-ol	TAR00332	Dipeptidyl peptidase 4	DPP4	P27487
MOL000231	trans-1,7-Diphenyl-1hepten-5-ol	TAR02928	Trypsin-1	PRSS1	P07477
MOL000122	1,8-cineole	TAR00017	Prothrombin	F2	P00734
MOL000122	1,8-cineole	TAR00094	Prostaglandin G/H synthase 2	PTGS2	P35354
MOL000122	1,8-cineole	TAR00095	Nitric oxide synthase, endothelial	NOS3	P29474
MOL000122	1,8-cineole	TAR00117	Carbonic anhydrase 2	CA2	P00918
MOL000122	1,8-cineole	TAR00141	Gamma-aminobutyric acid receptor subunit alpha-2	GABRA2	P47869
MOL000122	1,8-cineole	TAR00165	Acetylcholinesterase	ACHE	P22303
MOL000122	1,8-cineole	TAR00181	Gamma-aminobutyric acid receptor subunit alpha-5	GABRA5	P31644
MOL000122	1,8-cineole	TAR00200	Gamma-aminobutyric acid receptor subunit alpha-3	GABRA3	P34903
MOL000122	1,8-cineole	TAR00284	Neuronal acetylcholine receptor subunit alpha-2	CHRNA2	Q15822
MOL000122	1,8-cineole	TAR00309	Gamma-aminobutyric acid receptor subunit alpha-1	GABRA1	P14867
MOL000122	1,8-cineole	TAR00332	Dipeptidyl peptidase 4	DPP4	P27487
MOL000122	1,8-cineole	TAR00726	Alcohol dehydrogenase 1B	ADH1B	P00325
MOL000122	1,8-cineole	TAR00727	Alcohol dehydrogenase 1C	ADH1C	P00326
MOL000122	1,8-cineole	TAR02928	Trypsin-1	PRSS1	P07477
MOL000125	(-)-alpha-Pinene	TAR00141	Gamma-aminobutyric acid receptor subunit alpha-2	GABRA2	P47869
MOL000125	(-)-alpha-Pinene	TAR00165	Acetylcholinesterase	ACHE	P22303
MOL000125	(-)-alpha-Pinene	TAR00309	Gamma-aminobutyric acid receptor subunit alpha-1	GABRA1	P14867
MOL000125	(-)-alpha-Pinene	TAR00332	Dipeptidyl peptidase 4	DPP4	P27487
MOL000125	(-)-alpha-Pinene	TAR00422	Glycogen synthase kinase-3 beta	GSK3B	P49841
MOL000125	(-)-alpha-Pinene	TAR02928	Trypsin-1	PRSS1	P07477
MOL000235	1,7-diphenyl-3,5-dihydroxy-1-heptene	TAR00016	Muscarinic acetylcholine receptor M3	CHRM3	P20309
MOL000235	1,7-diphenyl-3,5-dihydroxy-1-heptene	TAR00017	Prothrombin	F2	P00734
MOL000235	1,7-diphenyl-3,5-dihydroxy-1-heptene	TAR00038	Muscarinic acetylcholine receptor M1	CHRM1	P11229
MOL000235	1,7-diphenyl-3,5-dihydroxy-1-heptene	TAR00046	Estrogen receptor	ESR1	P03372
MOL000235	1,7-diphenyl-3,5-dihydroxy-1-heptene	TAR00063	Beta-1 adrenergic receptor	ADRB1	P08588
MOL000235	1,7-diphenyl-3,5-dihydroxy-1-heptene	TAR00216	Alpha-1B adrenergic receptor	ADRA1B	P35368
MOL000235	1,7-diphenyl-3,5-dihydroxy-1-heptene	TAR00239	Sodium-dependent dopamine transporter	SLC6A3	Q01959
MOL000235	1,7-diphenyl-3,5-dihydroxy-1-heptene	TAR00261	Beta-2 adrenergic receptor	ADRB2	P07550
MOL000235	1,7-diphenyl-3,5-dihydroxy-1-heptene	TAR00332	Dipeptidyl peptidase 4	DPP4	P27487
MOL000235	1,7-diphenyl-3,5-dihydroxy-1-heptene	TAR00402	Mitogen-activated protein kinase 14	MAPK14	Q16539
MOL000235	1,7-diphenyl-3,5-dihydroxy-1-heptene	TAR00521	Leukotriene A-4 hydrolase	LTA4H	P09960
MOL000235	1,7-diphenyl-3,5-dihydroxy-1-heptene	TAR03586	cAMP-dependent protein kinase inhibitor alpha	PKIA	P61925
MOL000236	1,7-diphenyl-4,6-heptadien-3-one	TAR00017	Prothrombin	F2	P00734
MOL000236	1,7-diphenyl-4,6-heptadien-3-one	TAR00046	Estrogen receptor	ESR1	P03372
MOL000236	1,7-diphenyl-4,6-heptadien-3-one	TAR00261	Beta-2 adrenergic receptor	ADRB2	P07550
MOL000236	1,7-diphenyl-4,6-heptadien-3-one	TAR00332	Dipeptidyl peptidase 4	DPP4	P27487
MOL000236	1,7-diphenyl-4,6-heptadien-3-one	TAR00565	Amine oxidase [flavin-containing] B	MAOB	P27338
MOL000236	1,7-diphenyl-4,6-heptadien-3-one	TAR02928	Trypsin-1	PRSS1	P07477
MOL000237	Trans-1,7-diphenyl-1-hepten-5-ol	TAR00017	Prothrombin	F2	P00734
MOL000237	Trans-1,7-diphenyl-1-hepten-5-ol	TAR00038	Muscarinic acetylcholine receptor M1	CHRM1	P11229
MOL000237	Trans-1,7-diphenyl-1-hepten-5-ol	TAR00046	Estrogen receptor	ESR1	P03372
MOL000237	Trans-1,7-diphenyl-1-hepten-5-ol	TAR00126	Alpha-2C adrenergic receptor	ADRA2C	P18825
MOL000237	Trans-1,7-diphenyl-1-hepten-5-ol	TAR00216	Alpha-1B adrenergic receptor	ADRA1B	P35368
MOL000237	Trans-1,7-diphenyl-1-hepten-5-ol	TAR00261	Beta-2 adrenergic receptor	ADRB2	P07550
MOL000238	1,7-diphenyl-5-hydroxy-6-hepten-3-one	TAR00016	Muscarinic acetylcholine receptor M3	CHRM3	P20309
MOL000238	1,7-diphenyl-5-hydroxy-6-hepten-3-one	TAR00017	Prothrombin	F2	P00734
MOL000238	1,7-diphenyl-5-hydroxy-6-hepten-3-one	TAR00038	Muscarinic acetylcholine receptor M1	CHRM1	P11229
MOL000238	1,7-diphenyl-5-hydroxy-6-hepten-3-one	TAR00046	Estrogen receptor	ESR1	P03372
MOL000238	1,7-diphenyl-5-hydroxy-6-hepten-3-one	TAR00063	Beta-1 adrenergic receptor	ADRB1	P08588
MOL000238	1,7-diphenyl-5-hydroxy-6-hepten-3-one	TAR00078	Peroxisome proliferator-activated receptor gamma	PPARG	P37231
MOL000238	1,7-diphenyl-5-hydroxy-6-hepten-3-one	TAR00094	Prostaglandin G/H synthase 2	PTGS2	P35354
MOL000238	1,7-diphenyl-5-hydroxy-6-hepten-3-one	TAR00172	cGMP-inhibited 3',5'-cyclic phosphodiesterase A	PDE3A	Q14432
MOL000238	1,7-diphenyl-5-hydroxy-6-hepten-3-one	TAR00216	Alpha-1B adrenergic receptor	ADRA1B	P35368
MOL000238	1,7-diphenyl-5-hydroxy-6-hepten-3-one	TAR00261	Beta-2 adrenergic receptor	ADRB2	P07550
MOL000238	1,7-diphenyl-5-hydroxy-6-hepten-3-one	TAR00521	Leukotriene A-4 hydrolase	LTA4H	P09960
MOL000239	Jaranol	TAR00003	Nitric oxide synthase, inducible	NOS2	P35228
MOL000239	Jaranol	TAR00006	Prostaglandin G/H synthase 1	PTGS1	P23219
MOL000239	Jaranol	TAR00046	Estrogen receptor	ESR1	P03372
MOL000239	Jaranol	TAR00048	Androgen receptor	AR	P10275
MOL000239	Jaranol	TAR00070	Sodium channel protein type 5 subunit alpha	SCN5A	Q14524
MOL000239	Jaranol	TAR00078	Peroxisome proliferator-activated receptor gamma	PPARG	P37231
MOL000239	Jaranol	TAR00094	Prostaglandin G/H synthase 2	PTGS2	P35354
MOL000239	Jaranol	TAR00117	Carbonic anhydrase 2	CA2	P00918
MOL000239	Jaranol	TAR00229	Tyrosine-protein phosphatase non-receptor type 1	PTPN1	P18031
MOL000239	Jaranol	TAR00307	Estrogen receptor beta	ESR2	Q92731
MOL000239	Jaranol	TAR00332	Dipeptidyl peptidase 4	DPP4	P27487
MOL000239	Jaranol	TAR00402	Mitogen-activated protein kinase 14	MAPK14	Q16539
MOL000239	Jaranol	TAR00422	Glycogen synthase kinase-3 beta	GSK3B	P49841
MOL000239	Jaranol	TAR00482	Cyclin-dependent kinase 2	CDK2	P24941
MOL000239	Jaranol	TAR00647	Serine/threonine-protein kinase Chk1	CHEK1	O14757
MOL000239	Jaranol	TAR02928	Trypsin-1	PRSS1	P07477
MOL000239	Jaranol	TAR02966	Serine/threonine-protein kinase pim-1	PIM1	P11309
MOL000239	Jaranol	TAR03025	Cyclin-A2	CCNA2	P20248
MOL000239	Jaranol	TAR03276	Nuclear receptor coactivator 2	NCOA2	Q15596
MOL000240	(3R,5S)-1,7-di(phenyl)heptane-3,5-diol	TAR00017	Prothrombin	F2	P00734
MOL000240	(3R,5S)-1,7-di(phenyl)heptane-3,5-diol	TAR00046	Estrogen receptor	ESR1	P03372
MOL000240	(3R,5S)-1,7-di(phenyl)heptane-3,5-diol	TAR00261	Beta-2 adrenergic receptor	ADRB2	P07550
MOL000240	(3R,5S)-1,7-di(phenyl)heptane-3,5-diol	TAR00521	Leukotriene A-4 hydrolase	LTA4H	P09960
MOL000241	2',4'-dihydroxy-6'-methhoxychalcone	TAR00003	Nitric oxide synthase, inducible	NOS2	P35228
MOL000241	2',4'-dihydroxy-6'-methhoxychalcone	TAR00006	Prostaglandin G/H synthase 1	PTGS1	P23219
MOL000241	2',4'-dihydroxy-6'-methhoxychalcone	TAR00017	Prothrombin	F2	P00734
MOL000241	2',4'-dihydroxy-6'-methhoxychalcone	TAR00038	Muscarinic acetylcholine receptor M1	CHRM1	P11229
MOL000241	2',4'-dihydroxy-6'-methhoxychalcone	TAR00046	Estrogen receptor	ESR1	P03372
MOL000241	2',4'-dihydroxy-6'-methhoxychalcone	TAR00048	Androgen receptor	AR	P10275
MOL000241	2',4'-dihydroxy-6'-methhoxychalcone	TAR00078	Peroxisome proliferator-activated receptor gamma	PPARG	P37231
MOL000241	2',4'-dihydroxy-6'-methhoxychalcone	TAR00094	Prostaglandin G/H synthase 2	PTGS2	P35354
MOL000241	2',4'-dihydroxy-6'-methhoxychalcone	TAR00158	Retinoic acid receptor RXR-alpha	RXRA	P19793
MOL000241	2',4'-dihydroxy-6'-methhoxychalcone	TAR00172	cGMP-inhibited 3',5'-cyclic phosphodiesterase A	PDE3A	Q14432
MOL000241	2',4'-dihydroxy-6'-methhoxychalcone	TAR00229	Tyrosine-protein phosphatase non-receptor type 1	PTPN1	P18031
MOL000241	2',4'-dihydroxy-6'-methhoxychalcone	TAR00239	Sodium-dependent dopamine transporter	SLC6A3	Q01959
MOL000241	2',4'-dihydroxy-6'-methhoxychalcone	TAR00261	Beta-2 adrenergic receptor	ADRB2	P07550
MOL000241	2',4'-dihydroxy-6'-methhoxychalcone	TAR00290	Sodium-dependent serotonin transporter	SLC6A4	P31645
MOL000241	2',4'-dihydroxy-6'-methhoxychalcone	TAR00309	Gamma-aminobutyric acid receptor subunit alpha-1	GABRA1	P14867
MOL000241	2',4'-dihydroxy-6'-methhoxychalcone	TAR00332	Dipeptidyl peptidase 4	DPP4	P27487
MOL000241	2',4'-dihydroxy-6'-methhoxychalcone	TAR00402	Mitogen-activated protein kinase 14	MAPK14	Q16539
MOL000241	2',4'-dihydroxy-6'-methhoxychalcone	TAR00422	Glycogen synthase kinase-3 beta	GSK3B	P49841
MOL000241	2',4'-dihydroxy-6'-methhoxychalcone	TAR00482	Cyclin-dependent kinase 2	CDK2	P24941
MOL000241	2',4'-dihydroxy-6'-methhoxychalcone	TAR00491	Phosphatidylinositol 4,5-bisphosphate 3-kinase catalytic subunit gamma isoform	PIK3CG	P48736
MOL000241	2',4'-dihydroxy-6'-methhoxychalcone	TAR00499	Endoribonuclease LACTB2	LACTB2	Q53H82
MOL000241	2',4'-dihydroxy-6'-methhoxychalcone	TAR00565	Amine oxidase [flavin-containing] B	MAOB	P27338
MOL000241	2',4'-dihydroxy-6'-methhoxychalcone	TAR00647	Serine/threonine-protein kinase Chk1	CHEK1	O14757
MOL000241	2',4'-dihydroxy-6'-methhoxychalcone	TAR00699	cAMP-dependent protein kinase catalytic subunit alpha	PRKACA	P17612
MOL000241	2',4'-dihydroxy-6'-methhoxychalcone	TAR02928	Trypsin-1	PRSS1	P07477
MOL000241	2',4'-dihydroxy-6'-methhoxychalcone	TAR02966	Serine/threonine-protein kinase pim-1	PIM1	P11309
MOL000241	2',4'-dihydroxy-6'-methhoxychalcone	TAR03025	Cyclin-A2	CCNA2	P20248
MOL000241	2',4'-dihydroxy-6'-methhoxychalcone	TAR03586	cAMP-dependent protein kinase inhibitor alpha	PKIA	P61925
MOL000242	7-O-Methyleriodictyol	TAR00003	Nitric oxide synthase, inducible	NOS2	P35228
MOL000242	7-O-Methyleriodictyol	TAR00006	Prostaglandin G/H synthase 1	PTGS1	P23219
MOL000242	7-O-Methyleriodictyol	TAR00046	Estrogen receptor	ESR1	P03372
MOL000242	7-O-Methyleriodictyol	TAR00048	Androgen receptor	AR	P10275
MOL000242	7-O-Methyleriodictyol	TAR00078	Peroxisome proliferator-activated receptor gamma	PPARG	P37231
MOL000242	7-O-Methyleriodictyol	TAR00094	Prostaglandin G/H synthase 2	PTGS2	P35354
MOL000242	7-O-Methyleriodictyol	TAR00117	Carbonic anhydrase 2	CA2	P00918
MOL000242	7-O-Methyleriodictyol	TAR00229	Tyrosine-protein phosphatase non-receptor type 1	PTPN1	P18031
MOL000242	7-O-Methyleriodictyol	TAR00307	Estrogen receptor beta	ESR2	Q92731
MOL000242	7-O-Methyleriodictyol	TAR00332	Dipeptidyl peptidase 4	DPP4	P27487
MOL000242	7-O-Methyleriodictyol	TAR00402	Mitogen-activated protein kinase 14	MAPK14	Q16539
MOL000242	7-O-Methyleriodictyol	TAR00422	Glycogen synthase kinase-3 beta	GSK3B	P49841
MOL000242	7-O-Methyleriodictyol	TAR00482	Cyclin-dependent kinase 2	CDK2	P24941
MOL000242	7-O-Methyleriodictyol	TAR00499	Endoribonuclease LACTB2	LACTB2	Q53H82
MOL000242	7-O-Methyleriodictyol	TAR00647	Serine/threonine-protein kinase Chk1	CHEK1	O14757
MOL000242	7-O-Methyleriodictyol	TAR00699	cAMP-dependent protein kinase catalytic subunit alpha	PRKACA	P17612
MOL000242	7-O-Methyleriodictyol	TAR02928	Trypsin-1	PRSS1	P07477
MOL000242	7-O-Methyleriodictyol	TAR02966	Serine/threonine-protein kinase pim-1	PIM1	P11309
MOL000242	7-O-Methyleriodictyol	TAR03025	Cyclin-A2	CCNA2	P20248
MOL000243	alpinolide peroxide	TAR00003	Nitric oxide synthase, inducible	NOS2	P35228
MOL000243	alpinolide peroxide	TAR00017	Prothrombin	F2	P00734
MOL000243	alpinolide peroxide	TAR00094	Prostaglandin G/H synthase 2	PTGS2	P35354
MOL000243	alpinolide peroxide	TAR00165	Acetylcholinesterase	ACHE	P22303
MOL000243	alpinolide peroxide	TAR00309	Gamma-aminobutyric acid receptor subunit alpha-1	GABRA1	P14867
MOL000243	alpinolide peroxide	TAR00332	Dipeptidyl peptidase 4	DPP4	P27487
MOL000243	alpinolide peroxide	TAR00499	Endoribonuclease LACTB2	LACTB2	Q53H82
MOL000243	alpinolide peroxide	TAR03216	Glutamate receptor 2	GRIA2	P42262
MOL000243	alpinolide peroxide	TAR03284	Gamma-aminobutyric acid receptor subunit alpha-6	GABRA6	Q16445
MOL000246	(2R)-5,7-dihydroxy-2-phenylchroman-4-one	TAR00003	Nitric oxide synthase, inducible	NOS2	P35228
MOL000246	(2R)-5,7-dihydroxy-2-phenylchroman-4-one	TAR00006	Prostaglandin G/H synthase 1	PTGS1	P23219
MOL000246	(2R)-5,7-dihydroxy-2-phenylchroman-4-one	TAR00046	Estrogen receptor	ESR1	P03372
MOL000246	(2R)-5,7-dihydroxy-2-phenylchroman-4-one	TAR00048	Androgen receptor	AR	P10275
MOL000246	(2R)-5,7-dihydroxy-2-phenylchroman-4-one	TAR00078	Peroxisome proliferator-activated receptor gamma	PPARG	P37231
MOL000246	(2R)-5,7-dihydroxy-2-phenylchroman-4-one	TAR00094	Prostaglandin G/H synthase 2	PTGS2	P35354
MOL000246	(2R)-5,7-dihydroxy-2-phenylchroman-4-one	TAR00117	Carbonic anhydrase 2	CA2	P00918
MOL000246	(2R)-5,7-dihydroxy-2-phenylchroman-4-one	TAR00158	Retinoic acid receptor RXR-alpha	RXRA	P19793
MOL000246	(2R)-5,7-dihydroxy-2-phenylchroman-4-one	TAR00172	cGMP-inhibited 3',5'-cyclic phosphodiesterase A	PDE3A	Q14432
MOL000246	(2R)-5,7-dihydroxy-2-phenylchroman-4-one	TAR00229	Tyrosine-protein phosphatase non-receptor type 1	PTPN1	P18031
MOL000246	(2R)-5,7-dihydroxy-2-phenylchroman-4-one	TAR00261	Beta-2 adrenergic receptor	ADRB2	P07550
MOL000246	(2R)-5,7-dihydroxy-2-phenylchroman-4-one	TAR00290	Sodium-dependent serotonin transporter	SLC6A4	P31645
MOL000246	(2R)-5,7-dihydroxy-2-phenylchroman-4-one	TAR00307	Estrogen receptor beta	ESR2	Q92731
MOL000246	(2R)-5,7-dihydroxy-2-phenylchroman-4-one	TAR00309	Gamma-aminobutyric acid receptor subunit alpha-1	GABRA1	P14867
MOL000246	(2R)-5,7-dihydroxy-2-phenylchroman-4-one	TAR00332	Dipeptidyl peptidase 4	DPP4	P27487
MOL000246	(2R)-5,7-dihydroxy-2-phenylchroman-4-one	TAR00402	Mitogen-activated protein kinase 14	MAPK14	Q16539
MOL000246	(2R)-5,7-dihydroxy-2-phenylchroman-4-one	TAR00422	Glycogen synthase kinase-3 beta	GSK3B	P49841
MOL000246	(2R)-5,7-dihydroxy-2-phenylchroman-4-one	TAR00482	Cyclin-dependent kinase 2	CDK2	P24941
MOL000246	(2R)-5,7-dihydroxy-2-phenylchroman-4-one	TAR00491	Phosphatidylinositol 4,5-bisphosphate 3-kinase catalytic subunit gamma isoform	PIK3CG	P48736
MOL000246	(2R)-5,7-dihydroxy-2-phenylchroman-4-one	TAR00499	Endoribonuclease LACTB2	LACTB2	Q53H82
MOL000246	(2R)-5,7-dihydroxy-2-phenylchroman-4-one	TAR00565	Amine oxidase [flavin-containing] B	MAOB	P27338
MOL000246	(2R)-5,7-dihydroxy-2-phenylchroman-4-one	TAR00647	Serine/threonine-protein kinase Chk1	CHEK1	O14757
MOL000246	(2R)-5,7-dihydroxy-2-phenylchroman-4-one	TAR00699	cAMP-dependent protein kinase catalytic subunit alpha	PRKACA	P17612
MOL000246	(2R)-5,7-dihydroxy-2-phenylchroman-4-one	TAR02966	Serine/threonine-protein kinase pim-1	PIM1	P11309
MOL000246	(2R)-5,7-dihydroxy-2-phenylchroman-4-one	TAR03025	Cyclin-A2	CCNA2	P20248
MOL000246	(2R)-5,7-dihydroxy-2-phenylchroman-4-one	TAR03586	cAMP-dependent protein kinase inhibitor alpha	PKIA	P61925
MOL000126	(-)-nopinene	TAR00006	Prostaglandin G/H synthase 1	PTGS1	P23219
MOL000126	(-)-nopinene	TAR00016	Muscarinic acetylcholine receptor M3	CHRM3	P20309
MOL000126	(-)-nopinene	TAR00017	Prothrombin	F2	P00734
MOL000126	(-)-nopinene	TAR00038	Muscarinic acetylcholine receptor M1	CHRM1	P11229
MOL000126	(-)-nopinene	TAR00046	Estrogen receptor	ESR1	P03372
MOL000126	(-)-nopinene	TAR00094	Prostaglandin G/H synthase 2	PTGS2	P35354
MOL000126	(-)-nopinene	TAR00117	Carbonic anhydrase 2	CA2	P00918
MOL000126	(-)-nopinene	TAR00126	Alpha-2C adrenergic receptor	ADRA2C	P18825
MOL000126	(-)-nopinene	TAR00141	Gamma-aminobutyric acid receptor subunit alpha-2	GABRA2	P47869
MOL000126	(-)-nopinene	TAR00158	Retinoic acid receptor RXR-alpha	RXRA	P19793
MOL000126	(-)-nopinene	TAR00165	Acetylcholinesterase	ACHE	P22303
MOL000126	(-)-nopinene	TAR00181	Gamma-aminobutyric acid receptor subunit alpha-5	GABRA5	P31644
MOL000126	(-)-nopinene	TAR00186	Sodium-dependent noradrenaline transporter	SLC6A2	P23975
MOL000126	(-)-nopinene	TAR00191	Alpha-1A adrenergic receptor	ADRA1A	P35348
MOL000126	(-)-nopinene	TAR00200	Gamma-aminobutyric acid receptor subunit alpha-3	GABRA3	P34903
MOL000126	(-)-nopinene	TAR00210	Muscarinic acetylcholine receptor M2	CHRM2	P08172
MOL000126	(-)-nopinene	TAR00216	Alpha-1B adrenergic receptor	ADRA1B	P35368
MOL000126	(-)-nopinene	TAR00239	Sodium-dependent dopamine transporter	SLC6A3	Q01959
MOL000126	(-)-nopinene	TAR00284	Neuronal acetylcholine receptor subunit alpha-2	CHRNA2	Q15822
MOL000126	(-)-nopinene	TAR00309	Gamma-aminobutyric acid receptor subunit alpha-1	GABRA1	P14867
MOL000126	(-)-nopinene	TAR00332	Dipeptidyl peptidase 4	DPP4	P27487
MOL000126	(-)-nopinene	TAR00499	Endoribonuclease LACTB2	LACTB2	Q53H82
MOL000126	(-)-nopinene	TAR00566	Amine oxidase [flavin-containing] A	MAOA	P21397
MOL000126	(-)-nopinene	TAR01172	Lysozyme C	LYZ	P61626
MOL000126	(-)-nopinene	TAR02928	Trypsin-1	PRSS1	P07477
MOL000126	(-)-nopinene	TAR03276	Nuclear receptor coactivator 2	NCOA2	Q15596
MOL000126	(-)-nopinene	TAR03284	Gamma-aminobutyric acid receptor subunit alpha-6	GABRA6	Q16445
MOL000248	(5S)-5-isopropyl-2-methyl-1-cyclohex-2-enone	TAR00141	Gamma-aminobutyric acid receptor subunit alpha-2	GABRA2	P47869
MOL000248	(5S)-5-isopropyl-2-methyl-1-cyclohex-2-enone	TAR00186	Sodium-dependent noradrenaline transporter	SLC6A2	P23975
MOL000248	(5S)-5-isopropyl-2-methyl-1-cyclohex-2-enone	TAR00210	Muscarinic acetylcholine receptor M2	CHRM2	P08172
MOL000248	(5S)-5-isopropyl-2-methyl-1-cyclohex-2-enone	TAR00309	Gamma-aminobutyric acid receptor subunit alpha-1	GABRA1	P14867
MOL000248	(5S)-5-isopropyl-2-methyl-1-cyclohex-2-enone	TAR02928	Trypsin-1	PRSS1	P07477
MOL000253	Styrene, 3,4-dimethyl-	TAR01172	Lysozyme C	LYZ	P61626
MOL000253	Styrene, 3,4-dimethyl-	TAR02928	Trypsin-1	PRSS1	P07477
MOL000258	dehydrodiisoeugenol	TAR00003	Nitric oxide synthase, inducible	NOS2	P35228
MOL000258	dehydrodiisoeugenol	TAR00006	Prostaglandin G/H synthase 1	PTGS1	P23219
MOL000258	dehydrodiisoeugenol	TAR00016	Muscarinic acetylcholine receptor M3	CHRM3	P20309
MOL000258	dehydrodiisoeugenol	TAR00017	Prothrombin	F2	P00734
MOL000258	dehydrodiisoeugenol	TAR00038	Muscarinic acetylcholine receptor M1	CHRM1	P11229
MOL000258	dehydrodiisoeugenol	TAR00046	Estrogen receptor	ESR1	P03372
MOL000258	dehydrodiisoeugenol	TAR00048	Androgen receptor	AR	P10275
MOL000258	dehydrodiisoeugenol	TAR00070	Sodium channel protein type 5 subunit alpha	SCN5A	Q14524
MOL000258	dehydrodiisoeugenol	TAR00078	Peroxisome proliferator-activated receptor gamma	PPARG	P37231
MOL000258	dehydrodiisoeugenol	TAR00079	Coagulation factor X	F10	P00742
MOL000258	dehydrodiisoeugenol	TAR00087	Muscarinic acetylcholine receptor M5	CHRM5	P08912
MOL000258	dehydrodiisoeugenol	TAR00094	Prostaglandin G/H synthase 2	PTGS2	P35354
MOL000258	dehydrodiisoeugenol	TAR00095	Nitric oxide synthase, endothelial	NOS3	P29474
MOL000258	dehydrodiisoeugenol	TAR00117	Carbonic anhydrase 2	CA2	P00918
MOL000258	dehydrodiisoeugenol	TAR00158	Retinoic acid receptor RXR-alpha	RXRA	P19793
MOL000258	dehydrodiisoeugenol	TAR00165	Acetylcholinesterase	ACHE	P22303
MOL000258	dehydrodiisoeugenol	TAR00216	Alpha-1B adrenergic receptor	ADRA1B	P35368
MOL000258	dehydrodiisoeugenol	TAR00239	Sodium-dependent dopamine transporter	SLC6A3	Q01959
MOL000258	dehydrodiisoeugenol	TAR00261	Beta-2 adrenergic receptor	ADRB2	P07550
MOL000258	dehydrodiisoeugenol	TAR00307	Estrogen receptor beta	ESR2	Q92731
MOL000258	dehydrodiisoeugenol	TAR00332	Dipeptidyl peptidase 4	DPP4	P27487
MOL000258	dehydrodiisoeugenol	TAR00402	Mitogen-activated protein kinase 14	MAPK14	Q16539
MOL000258	dehydrodiisoeugenol	TAR00422	Glycogen synthase kinase-3 beta	GSK3B	P49841
MOL000258	dehydrodiisoeugenol	TAR00482	Cyclin-dependent kinase 2	CDK2	P24941
MOL000258	dehydrodiisoeugenol	TAR00647	Serine/threonine-protein kinase Chk1	CHEK1	O14757
MOL000258	dehydrodiisoeugenol	TAR02928	Trypsin-1	PRSS1	P07477
MOL000258	dehydrodiisoeugenol	TAR02966	Serine/threonine-protein kinase pim-1	PIM1	P11309
MOL000258	dehydrodiisoeugenol	TAR03025	Cyclin-A2	CCNA2	P20248
MOL000258	dehydrodiisoeugenol	TAR03276	Nuclear receptor coactivator 2	NCOA2	Q15596
MOL000259	o-Thymol	TAR00038	Muscarinic acetylcholine receptor M1	CHRM1	P11229
MOL000259	o-Thymol	TAR00063	Beta-1 adrenergic receptor	ADRB1	P08588
MOL000259	o-Thymol	TAR00126	Alpha-2C adrenergic receptor	ADRA2C	P18825
MOL000259	o-Thymol	TAR00186	Sodium-dependent noradrenaline transporter	SLC6A2	P23975
MOL000259	o-Thymol	TAR00191	Alpha-1A adrenergic receptor	ADRA1A	P35348
MOL000259	o-Thymol	TAR00210	Muscarinic acetylcholine receptor M2	CHRM2	P08172
MOL000259	o-Thymol	TAR00216	Alpha-1B adrenergic receptor	ADRA1B	P35368
MOL000259	o-Thymol	TAR00239	Sodium-dependent dopamine transporter	SLC6A3	Q01959
MOL000259	o-Thymol	TAR00261	Beta-2 adrenergic receptor	ADRB2	P07550
MOL000259	o-Thymol	TAR00272	Alpha-1D adrenergic receptor	ADRA1D	P25100
MOL000259	o-Thymol	TAR02928	Trypsin-1	PRSS1	P07477
MOL000260	5-[(2R,3R)-7-methoxy-3-methyl-5-[(E)-prop-1-enyl]-2,3-dihydrobenzofuran-2-yl]-1,3-benzodioxole	TAR00003	Nitric oxide synthase, inducible	NOS2	P35228
MOL000260	5-[(2R,3R)-7-methoxy-3-methyl-5-[(E)-prop-1-enyl]-2,3-dihydrobenzofuran-2-yl]-1,3-benzodioxole	TAR00006	Prostaglandin G/H synthase 1	PTGS1	P23219
MOL000260	5-[(2R,3R)-7-methoxy-3-methyl-5-[(E)-prop-1-enyl]-2,3-dihydrobenzofuran-2-yl]-1,3-benzodioxole	TAR00016	Muscarinic acetylcholine receptor M3	CHRM3	P20309
MOL000260	5-[(2R,3R)-7-methoxy-3-methyl-5-[(E)-prop-1-enyl]-2,3-dihydrobenzofuran-2-yl]-1,3-benzodioxole	TAR00017	Prothrombin	F2	P00734
MOL000260	5-[(2R,3R)-7-methoxy-3-methyl-5-[(E)-prop-1-enyl]-2,3-dihydrobenzofuran-2-yl]-1,3-benzodioxole	TAR00037	Potassium voltage-gated channel subfamily H member 2	KCNH2	Q12809
MOL000260	5-[(2R,3R)-7-methoxy-3-methyl-5-[(E)-prop-1-enyl]-2,3-dihydrobenzofuran-2-yl]-1,3-benzodioxole	TAR00038	Muscarinic acetylcholine receptor M1	CHRM1	P11229
MOL000260	5-[(2R,3R)-7-methoxy-3-methyl-5-[(E)-prop-1-enyl]-2,3-dihydrobenzofuran-2-yl]-1,3-benzodioxole	TAR00046	Estrogen receptor	ESR1	P03372
MOL000260	5-[(2R,3R)-7-methoxy-3-methyl-5-[(E)-prop-1-enyl]-2,3-dihydrobenzofuran-2-yl]-1,3-benzodioxole	TAR00048	Androgen receptor	AR	P10275
MOL000260	5-[(2R,3R)-7-methoxy-3-methyl-5-[(E)-prop-1-enyl]-2,3-dihydrobenzofuran-2-yl]-1,3-benzodioxole	TAR00070	Sodium channel protein type 5 subunit alpha	SCN5A	Q14524
MOL000260	5-[(2R,3R)-7-methoxy-3-methyl-5-[(E)-prop-1-enyl]-2,3-dihydrobenzofuran-2-yl]-1,3-benzodioxole	TAR00078	Peroxisome proliferator-activated receptor gamma	PPARG	P37231
MOL000260	5-[(2R,3R)-7-methoxy-3-methyl-5-[(E)-prop-1-enyl]-2,3-dihydrobenzofuran-2-yl]-1,3-benzodioxole	TAR00094	Prostaglandin G/H synthase 2	PTGS2	P35354
MOL000260	5-[(2R,3R)-7-methoxy-3-methyl-5-[(E)-prop-1-enyl]-2,3-dihydrobenzofuran-2-yl]-1,3-benzodioxole	TAR00095	Nitric oxide synthase, endothelial	NOS3	P29474
MOL000260	5-[(2R,3R)-7-methoxy-3-methyl-5-[(E)-prop-1-enyl]-2,3-dihydrobenzofuran-2-yl]-1,3-benzodioxole	TAR00158	Retinoic acid receptor RXR-alpha	RXRA	P19793
MOL000260	5-[(2R,3R)-7-methoxy-3-methyl-5-[(E)-prop-1-enyl]-2,3-dihydrobenzofuran-2-yl]-1,3-benzodioxole	TAR00165	Acetylcholinesterase	ACHE	P22303
MOL000260	5-[(2R,3R)-7-methoxy-3-methyl-5-[(E)-prop-1-enyl]-2,3-dihydrobenzofuran-2-yl]-1,3-benzodioxole	TAR00172	cGMP-inhibited 3',5'-cyclic phosphodiesterase A	PDE3A	Q14432
MOL000260	5-[(2R,3R)-7-methoxy-3-methyl-5-[(E)-prop-1-enyl]-2,3-dihydrobenzofuran-2-yl]-1,3-benzodioxole	TAR00216	Alpha-1B adrenergic receptor	ADRA1B	P35368
MOL000260	5-[(2R,3R)-7-methoxy-3-methyl-5-[(E)-prop-1-enyl]-2,3-dihydrobenzofuran-2-yl]-1,3-benzodioxole	TAR00229	Tyrosine-protein phosphatase non-receptor type 1	PTPN1	P18031
MOL000260	5-[(2R,3R)-7-methoxy-3-methyl-5-[(E)-prop-1-enyl]-2,3-dihydrobenzofuran-2-yl]-1,3-benzodioxole	TAR00261	Beta-2 adrenergic receptor	ADRB2	P07550
MOL000260	5-[(2R,3R)-7-methoxy-3-methyl-5-[(E)-prop-1-enyl]-2,3-dihydrobenzofuran-2-yl]-1,3-benzodioxole	TAR00272	Alpha-1D adrenergic receptor	ADRA1D	P25100
MOL000260	5-[(2R,3R)-7-methoxy-3-methyl-5-[(E)-prop-1-enyl]-2,3-dihydrobenzofuran-2-yl]-1,3-benzodioxole	TAR00307	Estrogen receptor beta	ESR2	Q92731
MOL000260	5-[(2R,3R)-7-methoxy-3-methyl-5-[(E)-prop-1-enyl]-2,3-dihydrobenzofuran-2-yl]-1,3-benzodioxole	TAR00332	Dipeptidyl peptidase 4	DPP4	P27487
MOL000260	5-[(2R,3R)-7-methoxy-3-methyl-5-[(E)-prop-1-enyl]-2,3-dihydrobenzofuran-2-yl]-1,3-benzodioxole	TAR00402	Mitogen-activated protein kinase 14	MAPK14	Q16539
MOL000260	5-[(2R,3R)-7-methoxy-3-methyl-5-[(E)-prop-1-enyl]-2,3-dihydrobenzofuran-2-yl]-1,3-benzodioxole	TAR00422	Glycogen synthase kinase-3 beta	GSK3B	P49841
MOL000260	5-[(2R,3R)-7-methoxy-3-methyl-5-[(E)-prop-1-enyl]-2,3-dihydrobenzofuran-2-yl]-1,3-benzodioxole	TAR00482	Cyclin-dependent kinase 2	CDK2	P24941
MOL000260	5-[(2R,3R)-7-methoxy-3-methyl-5-[(E)-prop-1-enyl]-2,3-dihydrobenzofuran-2-yl]-1,3-benzodioxole	TAR00647	Serine/threonine-protein kinase Chk1	CHEK1	O14757
MOL000260	5-[(2R,3R)-7-methoxy-3-methyl-5-[(E)-prop-1-enyl]-2,3-dihydrobenzofuran-2-yl]-1,3-benzodioxole	TAR00699	cAMP-dependent protein kinase catalytic subunit alpha	PRKACA	P17612
MOL000260	5-[(2R,3R)-7-methoxy-3-methyl-5-[(E)-prop-1-enyl]-2,3-dihydrobenzofuran-2-yl]-1,3-benzodioxole	TAR02928	Trypsin-1	PRSS1	P07477
MOL000260	5-[(2R,3R)-7-methoxy-3-methyl-5-[(E)-prop-1-enyl]-2,3-dihydrobenzofuran-2-yl]-1,3-benzodioxole	TAR02966	Serine/threonine-protein kinase pim-1	PIM1	P11309
MOL000260	5-[(2R,3R)-7-methoxy-3-methyl-5-[(E)-prop-1-enyl]-2,3-dihydrobenzofuran-2-yl]-1,3-benzodioxole	TAR03025	Cyclin-A2	CCNA2	P20248
MOL000260	5-[(2R,3R)-7-methoxy-3-methyl-5-[(E)-prop-1-enyl]-2,3-dihydrobenzofuran-2-yl]-1,3-benzodioxole	TAR03727	Calcium-activated potassium channel subunit alpha-1	KCNMA1	Q12791
MOL000196	L-Bornyl acetate	TAR00007	D	DRD1	P21728
MOL000196	L-Bornyl acetate	TAR00016	Muscarinic acetylcholine receptor M3	CHRM3	P20309
MOL000196	L-Bornyl acetate	TAR00017	Prothrombin	F2	P00734
MOL000196	L-Bornyl acetate	TAR00038	Muscarinic acetylcholine receptor M1	CHRM1	P11229
MOL000196	L-Bornyl acetate	TAR00094	Prostaglandin G/H synthase 2	PTGS2	P35354
MOL000196	L-Bornyl acetate	TAR00105	Alpha-2A adrenergic receptor	ADRA2A	P08913
MOL000196	L-Bornyl acetate	TAR00141	Gamma-aminobutyric acid receptor subunit alpha-2	GABRA2	P47869
MOL000196	L-Bornyl acetate	TAR00165	Acetylcholinesterase	ACHE	P22303
MOL000196	L-Bornyl acetate	TAR00181	Gamma-aminobutyric acid receptor subunit alpha-5	GABRA5	P31644
MOL000196	L-Bornyl acetate	TAR00186	Sodium-dependent noradrenaline transporter	SLC6A2	P23975
MOL000196	L-Bornyl acetate	TAR00200	Gamma-aminobutyric acid receptor subunit alpha-3	GABRA3	P34903
MOL000196	L-Bornyl acetate	TAR00210	Muscarinic acetylcholine receptor M2	CHRM2	P08172
MOL000196	L-Bornyl acetate	TAR00216	Alpha-1B adrenergic receptor	ADRA1B	P35368
MOL000196	L-Bornyl acetate	TAR00284	Neuronal acetylcholine receptor subunit alpha-2	CHRNA2	Q15822
MOL000196	L-Bornyl acetate	TAR00309	Gamma-aminobutyric acid receptor subunit alpha-1	GABRA1	P14867
MOL000196	L-Bornyl acetate	TAR00332	Dipeptidyl peptidase 4	DPP4	P27487
MOL000196	L-Bornyl acetate	TAR02966	Serine/threonine-protein kinase pim-1	PIM1	P11309
MOL000196	L-Bornyl acetate	TAR03216	Glutamate receptor 2	GRIA2	P42262
MOL000196	L-Bornyl acetate	TAR03284	Gamma-aminobutyric acid receptor subunit alpha-6	GABRA6	Q16445
MOL000196	L-Bornyl acetate	TAR03529	Gamma-aminobutyric acid receptor subunit alpha-4	GABRA4	P48169
MOL000266	beta-Cubebene	TAR00003	Nitric oxide synthase, inducible	NOS2	P35228
MOL000266	beta-Cubebene	TAR00017	Prothrombin	F2	P00734
MOL000266	beta-Cubebene	TAR00038	Muscarinic acetylcholine receptor M1	CHRM1	P11229
MOL000266	beta-Cubebene	TAR00094	Prostaglandin G/H synthase 2	PTGS2	P35354
MOL000266	beta-Cubebene	TAR00095	Nitric oxide synthase, endothelial	NOS3	P29474
MOL000266	beta-Cubebene	TAR00165	Acetylcholinesterase	ACHE	P22303
MOL000266	beta-Cubebene	TAR00186	Sodium-dependent noradrenaline transporter	SLC6A2	P23975
MOL000266	beta-Cubebene	TAR00210	Muscarinic acetylcholine receptor M2	CHRM2	P08172
MOL000266	beta-Cubebene	TAR00284	Neuronal acetylcholine receptor subunit alpha-2	CHRNA2	Q15822
MOL000266	beta-Cubebene	TAR00309	Gamma-aminobutyric acid receptor subunit alpha-1	GABRA1	P14867
MOL000266	beta-Cubebene	TAR00332	Dipeptidyl peptidase 4	DPP4	P27487
MOL000266	beta-Cubebene	TAR00499	Endoribonuclease LACTB2	LACTB2	Q53H82
MOL000270	CHEBI:7	TAR00016	Muscarinic acetylcholine receptor M3	CHRM3	P20309
MOL000270	CHEBI:7	TAR00038	Muscarinic acetylcholine receptor M1	CHRM1	P11229
MOL000270	CHEBI:7	TAR00046	Estrogen receptor	ESR1	P03372
MOL000270	CHEBI:7	TAR00048	Androgen receptor	AR	P10275
MOL000270	CHEBI:7	TAR00079	Coagulation factor X	F10	P00742
MOL000270	CHEBI:7	TAR00094	Prostaglandin G/H synthase 2	PTGS2	P35354
MOL000270	CHEBI:7	TAR00117	Carbonic anhydrase 2	CA2	P00918
MOL000270	CHEBI:7	TAR00154	Muscarinic acetylcholine receptor M4	CHRM4	P08173
MOL000270	CHEBI:7	TAR00165	Acetylcholinesterase	ACHE	P22303
MOL000270	CHEBI:7	TAR00172	cGMP-inhibited 3',5'-cyclic phosphodiesterase A	PDE3A	Q14432
MOL000270	CHEBI:7	TAR00175	5-hydroxytryptamine receptor 2A	HTR2A	P28223
MOL000270	CHEBI:7	TAR00210	Muscarinic acetylcholine receptor M2	CHRM2	P08172
MOL000270	CHEBI:7	TAR00216	Alpha-1B adrenergic receptor	ADRA1B	P35368
MOL000270	CHEBI:7	TAR00261	Beta-2 adrenergic receptor	ADRB2	P07550
MOL000270	CHEBI:7	TAR00290	Sodium-dependent serotonin transporter	SLC6A4	P31645
MOL000270	CHEBI:7	TAR00309	Gamma-aminobutyric acid receptor subunit alpha-1	GABRA1	P14867
MOL000270	CHEBI:7	TAR02966	Serine/threonine-protein kinase pim-1	PIM1	P11309
MOL000270	CHEBI:7	TAR03276	Nuclear receptor coactivator 2	NCOA2	Q15596
MOL000271	l-carvone	TAR00016	Muscarinic acetylcholine receptor M3	CHRM3	P20309
MOL000271	l-carvone	TAR00017	Prothrombin	F2	P00734
MOL000271	l-carvone	TAR00094	Prostaglandin G/H synthase 2	PTGS2	P35354
MOL000271	l-carvone	TAR00141	Gamma-aminobutyric acid receptor subunit alpha-2	GABRA2	P47869
MOL000271	l-carvone	TAR00165	Acetylcholinesterase	ACHE	P22303
MOL000271	l-carvone	TAR00309	Gamma-aminobutyric acid receptor subunit alpha-1	GABRA1	P14867
MOL000271	l-carvone	TAR02928	Trypsin-1	PRSS1	P07477
MOL000199	Safrol	TAR00003	Nitric oxide synthase, inducible	NOS2	P35228
MOL000199	Safrol	TAR00006	Prostaglandin G/H synthase 1	PTGS1	P23219
MOL000199	Safrol	TAR00017	Prothrombin	F2	P00734
MOL000199	Safrol	TAR00038	Muscarinic acetylcholine receptor M1	CHRM1	P11229
MOL000199	Safrol	TAR00063	Beta-1 adrenergic receptor	ADRB1	P08588
MOL000199	Safrol	TAR00094	Prostaglandin G/H synthase 2	PTGS2	P35354
MOL000199	Safrol	TAR00095	Nitric oxide synthase, endothelial	NOS3	P29474
MOL000199	Safrol	TAR00105	Alpha-2A adrenergic receptor	ADRA2A	P08913
MOL000199	Safrol	TAR00117	Carbonic anhydrase 2	CA2	P00918
MOL000199	Safrol	TAR00126	Alpha-2C adrenergic receptor	ADRA2C	P18825
MOL000199	Safrol	TAR00186	Sodium-dependent noradrenaline transporter	SLC6A2	P23975
MOL000199	Safrol	TAR00191	Alpha-1A adrenergic receptor	ADRA1A	P35348
MOL000199	Safrol	TAR00210	Muscarinic acetylcholine receptor M2	CHRM2	P08172
MOL000199	Safrol	TAR00214	Alpha-2B adrenergic receptor	ADRA2B	P18089
MOL000199	Safrol	TAR00216	Alpha-1B adrenergic receptor	ADRA1B	P35368
MOL000199	Safrol	TAR00239	Sodium-dependent dopamine transporter	SLC6A3	Q01959
MOL000199	Safrol	TAR00261	Beta-2 adrenergic receptor	ADRB2	P07550
MOL000199	Safrol	TAR00272	Alpha-1D adrenergic receptor	ADRA1D	P25100
MOL000199	Safrol	TAR00332	Dipeptidyl peptidase 4	DPP4	P27487
MOL000199	Safrol	TAR00482	Cyclin-dependent kinase 2	CDK2	P24941
MOL000199	Safrol	TAR00499	Endoribonuclease LACTB2	LACTB2	Q53H82
MOL000199	Safrol	TAR00521	Leukotriene A-4 hydrolase	LTA4H	P09960
MOL000199	Safrol	TAR00565	Amine oxidase [flavin-containing] B	MAOB	P27338
MOL000199	Safrol	TAR00566	Amine oxidase [flavin-containing] A	MAOA	P21397
MOL000199	Safrol	TAR01172	Lysozyme C	LYZ	P61626
MOL000199	Safrol	TAR01696	Chymotrypsinogen B	CTRB1	P17538
MOL000199	Safrol	TAR02928	Trypsin-1	PRSS1	P07477
MOL000200	(S)-(+)-alpha-Phellandrene	TAR00165	Acetylcholinesterase	ACHE	P22303
MOL000200	(S)-(+)-alpha-Phellandrene	TAR00309	Gamma-aminobutyric acid receptor subunit alpha-1	GABRA1	P14867
MOL000200	(S)-(+)-alpha-Phellandrene	TAR00332	Dipeptidyl peptidase 4	DPP4	P27487
MOL000200	(S)-(+)-alpha-Phellandrene	TAR02928	Trypsin-1	PRSS1	P07477
MOL000202	Moslene	TAR00094	Prostaglandin G/H synthase 2	PTGS2	P35354
MOL000202	Moslene	TAR00095	Nitric oxide synthase, endothelial	NOS3	P29474
MOL000202	Moslene	TAR00165	Acetylcholinesterase	ACHE	P22303
MOL000202	Moslene	TAR00309	Gamma-aminobutyric acid receptor subunit alpha-1	GABRA1	P14867
MOL000202	Moslene	TAR00332	Dipeptidyl peptidase 4	DPP4	P27487
MOL000202	Moslene	TAR00726	Alcohol dehydrogenase 1B	ADH1B	P00325
MOL000202	Moslene	TAR00727	Alcohol dehydrogenase 1C	ADH1C	P00326
MOL000202	Moslene	TAR00729	Alcohol dehydrogenase 1A	ADH1A	P07327
MOL000202	Moslene	TAR02928	Trypsin-1	PRSS1	P07477
MOL000207	Methyleugenol	TAR00006	Prostaglandin G/H synthase 1	PTGS1	P23219
MOL000207	Methyleugenol	TAR00007	D	DRD1	P21728
MOL000207	Methyleugenol	TAR00016	Muscarinic acetylcholine receptor M3	CHRM3	P20309
MOL000207	Methyleugenol	TAR00017	Prothrombin	F2	P00734
MOL000207	Methyleugenol	TAR00038	Muscarinic acetylcholine receptor M1	CHRM1	P11229
MOL000207	Methyleugenol	TAR00063	Beta-1 adrenergic receptor	ADRB1	P08588
MOL000207	Methyleugenol	TAR00070	Sodium channel protein type 5 subunit alpha	SCN5A	Q14524
MOL000207	Methyleugenol	TAR00094	Prostaglandin G/H synthase 2	PTGS2	P35354
MOL000207	Methyleugenol	TAR00095	Nitric oxide synthase, endothelial	NOS3	P29474
MOL000207	Methyleugenol	TAR00105	Alpha-2A adrenergic receptor	ADRA2A	P08913
MOL000207	Methyleugenol	TAR00117	Carbonic anhydrase 2	CA2	P00918
MOL000207	Methyleugenol	TAR00126	Alpha-2C adrenergic receptor	ADRA2C	P18825
MOL000207	Methyleugenol	TAR00165	Acetylcholinesterase	ACHE	P22303
MOL000207	Methyleugenol	TAR00175	5-hydroxytryptamine receptor 2A	HTR2A	P28223
MOL000207	Methyleugenol	TAR00186	Sodium-dependent noradrenaline transporter	SLC6A2	P23975
MOL000207	Methyleugenol	TAR00191	Alpha-1A adrenergic receptor	ADRA1A	P35348
MOL000207	Methyleugenol	TAR00210	Muscarinic acetylcholine receptor M2	CHRM2	P08172
MOL000207	Methyleugenol	TAR00214	Alpha-2B adrenergic receptor	ADRA2B	P18089
MOL000207	Methyleugenol	TAR00216	Alpha-1B adrenergic receptor	ADRA1B	P35368
MOL000207	Methyleugenol	TAR00239	Sodium-dependent dopamine transporter	SLC6A3	Q01959
MOL000207	Methyleugenol	TAR00261	Beta-2 adrenergic receptor	ADRB2	P07550
MOL000207	Methyleugenol	TAR00272	Alpha-1D adrenergic receptor	ADRA1D	P25100
MOL000207	Methyleugenol	TAR00290	Sodium-dependent serotonin transporter	SLC6A4	P31645
MOL000207	Methyleugenol	TAR00332	Dipeptidyl peptidase 4	DPP4	P27487
MOL000207	Methyleugenol	TAR00346	Urokinase-type plasminogen activator	PLAU	P00749
MOL000207	Methyleugenol	TAR00499	Endoribonuclease LACTB2	LACTB2	Q53H82
MOL000207	Methyleugenol	TAR00521	Leukotriene A-4 hydrolase	LTA4H	P09960
MOL000207	Methyleugenol	TAR00565	Amine oxidase [flavin-containing] B	MAOB	P27338
MOL000207	Methyleugenol	TAR02928	Trypsin-1	PRSS1	P07477
MOL000207	Methyleugenol	TAR03586	cAMP-dependent protein kinase inhibitor alpha	PKIA	P61925
MOL000232	()-alpha-Terpineol	TAR00016	Muscarinic acetylcholine receptor M3	CHRM3	P20309
MOL000232	()-alpha-Terpineol	TAR00017	Prothrombin	F2	P00734
MOL000232	()-alpha-Terpineol	TAR00038	Muscarinic acetylcholine receptor M1	CHRM1	P11229
MOL000232	()-alpha-Terpineol	TAR00063	Beta-1 adrenergic receptor	ADRB1	P08588
MOL000232	()-alpha-Terpineol	TAR00141	Gamma-aminobutyric acid receptor subunit alpha-2	GABRA2	P47869
MOL000232	()-alpha-Terpineol	TAR00158	Retinoic acid receptor RXR-alpha	RXRA	P19793
MOL000232	()-alpha-Terpineol	TAR00172	cGMP-inhibited 3',5'-cyclic phosphodiesterase A	PDE3A	Q14432
MOL000232	()-alpha-Terpineol	TAR00175	5-hydroxytryptamine receptor 2A	HTR2A	P28223
MOL000232	()-alpha-Terpineol	TAR00181	Gamma-aminobutyric acid receptor subunit alpha-5	GABRA5	P31644
MOL000232	()-alpha-Terpineol	TAR00186	Sodium-dependent noradrenaline transporter	SLC6A2	P23975
MOL000232	()-alpha-Terpineol	TAR00191	Alpha-1A adrenergic receptor	ADRA1A	P35348
MOL000232	()-alpha-Terpineol	TAR00200	Gamma-aminobutyric acid receptor subunit alpha-3	GABRA3	P34903
MOL000232	()-alpha-Terpineol	TAR00210	Muscarinic acetylcholine receptor M2	CHRM2	P08172
MOL000232	()-alpha-Terpineol	TAR00216	Alpha-1B adrenergic receptor	ADRA1B	P35368
MOL000232	()-alpha-Terpineol	TAR00239	Sodium-dependent dopamine transporter	SLC6A3	Q01959
MOL000232	()-alpha-Terpineol	TAR00261	Beta-2 adrenergic receptor	ADRB2	P07550
MOL000232	()-alpha-Terpineol	TAR00290	Sodium-dependent serotonin transporter	SLC6A4	P31645
MOL000232	()-alpha-Terpineol	TAR00309	Gamma-aminobutyric acid receptor subunit alpha-1	GABRA1	P14867
MOL000232	()-alpha-Terpineol	TAR00332	Dipeptidyl peptidase 4	DPP4	P27487
MOL000232	()-alpha-Terpineol	TAR00565	Amine oxidase [flavin-containing] B	MAOB	P27338
MOL000232	()-alpha-Terpineol	TAR00566	Amine oxidase [flavin-containing] A	MAOA	P21397
MOL000232	()-alpha-Terpineol	TAR01201	Immunoglobulin heavy constant gamma 1	IGHG1	P01857
MOL000232	()-alpha-Terpineol	TAR02928	Trypsin-1	PRSS1	P07477
MOL000232	()-alpha-Terpineol	TAR03284	Gamma-aminobutyric acid receptor subunit alpha-6	GABRA6	Q16445
MOL000233	delta-Terpineol	TAR00016	Muscarinic acetylcholine receptor M3	CHRM3	P20309
MOL000233	delta-Terpineol	TAR00038	Muscarinic acetylcholine receptor M1	CHRM1	P11229
MOL000233	delta-Terpineol	TAR00141	Gamma-aminobutyric acid receptor subunit alpha-2	GABRA2	P47869
MOL000233	delta-Terpineol	TAR00181	Gamma-aminobutyric acid receptor subunit alpha-5	GABRA5	P31644
MOL000233	delta-Terpineol	TAR00186	Sodium-dependent noradrenaline transporter	SLC6A2	P23975
MOL000233	delta-Terpineol	TAR00200	Gamma-aminobutyric acid receptor subunit alpha-3	GABRA3	P34903
MOL000233	delta-Terpineol	TAR00210	Muscarinic acetylcholine receptor M2	CHRM2	P08172
MOL000233	delta-Terpineol	TAR00216	Alpha-1B adrenergic receptor	ADRA1B	P35368
MOL000233	delta-Terpineol	TAR00284	Neuronal acetylcholine receptor subunit alpha-2	CHRNA2	Q15822
MOL000233	delta-Terpineol	TAR00309	Gamma-aminobutyric acid receptor subunit alpha-1	GABRA1	P14867
MOL000233	delta-Terpineol	TAR00332	Dipeptidyl peptidase 4	DPP4	P27487
MOL000233	delta-Terpineol	TAR02928	Trypsin-1	PRSS1	P07477
MOL000233	delta-Terpineol	TAR03284	Gamma-aminobutyric acid receptor subunit alpha-6	GABRA6	Q16445
MOL000234	L-Limonen	TAR00094	Prostaglandin G/H synthase 2	PTGS2	P35354
MOL000234	L-Limonen	TAR00095	Nitric oxide synthase, endothelial	NOS3	P29474
MOL000234	L-Limonen	TAR00165	Acetylcholinesterase	ACHE	P22303
MOL000234	L-Limonen	TAR00309	Gamma-aminobutyric acid receptor subunit alpha-1	GABRA1	P14867
MOL000234	L-Limonen	TAR00332	Dipeptidyl peptidase 4	DPP4	P27487
MOL000234	L-Limonen	TAR00726	Alcohol dehydrogenase 1B	ADH1B	P00325
MOL000234	L-Limonen	TAR00727	Alcohol dehydrogenase 1C	ADH1C	P00326
MOL000234	L-Limonen	TAR02928	Trypsin-1	PRSS1	P07477
MOL000244	()-Borneol	TAR00003	Nitric oxide synthase, inducible	NOS2	P35228
MOL000244	()-Borneol	TAR00006	Prostaglandin G/H synthase 1	PTGS1	P23219
MOL000244	()-Borneol	TAR00017	Prothrombin	F2	P00734
MOL000244	()-Borneol	TAR00046	Estrogen receptor	ESR1	P03372
MOL000244	()-Borneol	TAR00094	Prostaglandin G/H synthase 2	PTGS2	P35354
MOL000244	()-Borneol	TAR00095	Nitric oxide synthase, endothelial	NOS3	P29474
MOL000244	()-Borneol	TAR00117	Carbonic anhydrase 2	CA2	P00918
MOL000244	()-Borneol	TAR00141	Gamma-aminobutyric acid receptor subunit alpha-2	GABRA2	P47869
MOL000244	()-Borneol	TAR00165	Acetylcholinesterase	ACHE	P22303
MOL000244	()-Borneol	TAR00181	Gamma-aminobutyric acid receptor subunit alpha-5	GABRA5	P31644
MOL000244	()-Borneol	TAR00186	Sodium-dependent noradrenaline transporter	SLC6A2	P23975
MOL000244	()-Borneol	TAR00200	Gamma-aminobutyric acid receptor subunit alpha-3	GABRA3	P34903
MOL000244	()-Borneol	TAR00210	Muscarinic acetylcholine receptor M2	CHRM2	P08172
MOL000244	()-Borneol	TAR00309	Gamma-aminobutyric acid receptor subunit alpha-1	GABRA1	P14867
MOL000244	()-Borneol	TAR00332	Dipeptidyl peptidase 4	DPP4	P27487
MOL000244	()-Borneol	TAR00499	Endoribonuclease LACTB2	LACTB2	Q53H82
MOL000244	()-Borneol	TAR00565	Amine oxidase [flavin-containing] B	MAOB	P27338
MOL000244	()-Borneol	TAR01201	Immunoglobulin heavy constant gamma 1	IGHG1	P01857
MOL000244	()-Borneol	TAR02928	Trypsin-1	PRSS1	P07477
MOL000244	()-Borneol	TAR03276	Nuclear receptor coactivator 2	NCOA2	Q15596
MOL000244	()-Borneol	TAR03284	Gamma-aminobutyric acid receptor subunit alpha-6	GABRA6	Q16445
MOL000251	Rhamnocitrin	TAR00003	Nitric oxide synthase, inducible	NOS2	P35228
MOL000251	Rhamnocitrin	TAR00006	Prostaglandin G/H synthase 1	PTGS1	P23219
MOL000251	Rhamnocitrin	TAR00046	Estrogen receptor	ESR1	P03372
MOL000251	Rhamnocitrin	TAR00048	Androgen receptor	AR	P10275
MOL000251	Rhamnocitrin	TAR00078	Peroxisome proliferator-activated receptor gamma	PPARG	P37231
MOL000251	Rhamnocitrin	TAR00094	Prostaglandin G/H synthase 2	PTGS2	P35354
MOL000251	Rhamnocitrin	TAR00117	Carbonic anhydrase 2	CA2	P00918
MOL000251	Rhamnocitrin	TAR00229	Tyrosine-protein phosphatase non-receptor type 1	PTPN1	P18031
MOL000251	Rhamnocitrin	TAR00288	Aldose reductase	AKR1B1	P15121
MOL000251	Rhamnocitrin	TAR00307	Estrogen receptor beta	ESR2	Q92731
MOL000251	Rhamnocitrin	TAR00332	Dipeptidyl peptidase 4	DPP4	P27487
MOL000251	Rhamnocitrin	TAR00402	Mitogen-activated protein kinase 14	MAPK14	Q16539
MOL000251	Rhamnocitrin	TAR00422	Glycogen synthase kinase-3 beta	GSK3B	P49841
MOL000251	Rhamnocitrin	TAR00482	Cyclin-dependent kinase 2	CDK2	P24941
MOL000251	Rhamnocitrin	TAR00491	Phosphatidylinositol 4,5-bisphosphate 3-kinase catalytic subunit gamma isoform	PIK3CG	P48736
MOL000251	Rhamnocitrin	TAR00499	Endoribonuclease LACTB2	LACTB2	Q53H82
MOL000251	Rhamnocitrin	TAR00647	Serine/threonine-protein kinase Chk1	CHEK1	O14757
MOL000251	Rhamnocitrin	TAR00699	cAMP-dependent protein kinase catalytic subunit alpha	PRKACA	P17612
MOL000251	Rhamnocitrin	TAR02928	Trypsin-1	PRSS1	P07477
MOL000251	Rhamnocitrin	TAR02966	Serine/threonine-protein kinase pim-1	PIM1	P11309
MOL000251	Rhamnocitrin	TAR03025	Cyclin-A2	CCNA2	P20248
MOL000251	Rhamnocitrin	TAR03276	Nuclear receptor coactivator 2	NCOA2	Q15596
MOL000254	eugenol	TAR00003	Nitric oxide synthase, inducible	NOS2	P35228
MOL000254	eugenol	TAR00088	Arachidonate 5-lipoxygenase	ALOX5	P09917
MOL000254	eugenol	TAR00094	Prostaglandin G/H synthase 2	PTGS2	P35354
MOL000254	eugenol	TAR00325	T-lymphocyte activation antigen CD86	CD86	P42081
MOL000254	eugenol	TAR00565	Amine oxidase [flavin-containing] B	MAOB	P27338
MOL000254	eugenol	TAR00566	Amine oxidase [flavin-containing] A	MAOA	P21397
MOL000254	eugenol	TAR00651	Transient receptor potential cation channel subfamily V member 3	TRPV3	Q8NET8
MOL000254	eugenol	TAR03204	Aryl hydrocarbon receptor	AHR	P35869
MOL000254	eugenol	TAR03610	Calcium-transporting ATPase type 2C member 1	ATP2C1	P98194
MOL000254	eugenol	TAR03779	Quinone oxidoreductase	CRYZ	Q08257
MOL000254	eugenol	TAR03971	Serine/threonine-protein phosphatase 2B catalytic subunit alpha isoform	PPP3CA	Q08209
MOL000254	eugenol	TAR00006	Prostaglandin G/H synthase 1	PTGS1	P23219
MOL000254	eugenol	TAR00007	D	DRD1	P21728
MOL000254	eugenol	TAR00016	Muscarinic acetylcholine receptor M3	CHRM3	P20309
MOL000254	eugenol	TAR00017	Prothrombin	F2	P00734
MOL000254	eugenol	TAR00038	Muscarinic acetylcholine receptor M1	CHRM1	P11229
MOL000254	eugenol	TAR00063	Beta-1 adrenergic receptor	ADRB1	P08588
MOL000254	eugenol	TAR00070	Sodium channel protein type 5 subunit alpha	SCN5A	Q14524
MOL000254	eugenol	TAR00095	Nitric oxide synthase, endothelial	NOS3	P29474
MOL000254	eugenol	TAR00105	Alpha-2A adrenergic receptor	ADRA2A	P08913
MOL000254	eugenol	TAR00117	Carbonic anhydrase 2	CA2	P00918
MOL000254	eugenol	TAR00126	Alpha-2C adrenergic receptor	ADRA2C	P18825
MOL000254	eugenol	TAR00165	Acetylcholinesterase	ACHE	P22303
MOL000254	eugenol	TAR00186	Sodium-dependent noradrenaline transporter	SLC6A2	P23975
MOL000254	eugenol	TAR00191	Alpha-1A adrenergic receptor	ADRA1A	P35348
MOL000254	eugenol	TAR00210	Muscarinic acetylcholine receptor M2	CHRM2	P08172
MOL000254	eugenol	TAR00214	Alpha-2B adrenergic receptor	ADRA2B	P18089
MOL000254	eugenol	TAR00216	Alpha-1B adrenergic receptor	ADRA1B	P35368
MOL000254	eugenol	TAR00239	Sodium-dependent dopamine transporter	SLC6A3	Q01959
MOL000254	eugenol	TAR00261	Beta-2 adrenergic receptor	ADRB2	P07550
MOL000254	eugenol	TAR00272	Alpha-1D adrenergic receptor	ADRA1D	P25100
MOL000254	eugenol	TAR00332	Dipeptidyl peptidase 4	DPP4	P27487
MOL000254	eugenol	TAR00346	Urokinase-type plasminogen activator	PLAU	P00749
MOL000254	eugenol	TAR00499	Endoribonuclease LACTB2	LACTB2	Q53H82
MOL000254	eugenol	TAR00521	Leukotriene A-4 hydrolase	LTA4H	P09960
MOL000254	eugenol	TAR01172	Lysozyme C	LYZ	P61626
MOL000254	eugenol	TAR01696	Chymotrypsinogen B	CTRB1	P17538
MOL000254	eugenol	TAR02928	Trypsin-1	PRSS1	P07477
MOL000257	(-)-beta-Phellandrene	TAR00165	Acetylcholinesterase	ACHE	P22303
MOL000257	(-)-beta-Phellandrene	TAR00308	Glucocorticoid receptor	NR3C1	P04150
MOL000257	(-)-beta-Phellandrene	TAR00309	Gamma-aminobutyric acid receptor subunit alpha-1	GABRA1	P14867
MOL000257	(-)-beta-Phellandrene	TAR00332	Dipeptidyl peptidase 4	DPP4	P27487
MOL000257	(-)-beta-Phellandrene	TAR02928	Trypsin-1	PRSS1	P07477
MOL000261	Myristicin	TAR00003	Nitric oxide synthase, inducible	NOS2	P35228
MOL000261	Myristicin	TAR00006	Prostaglandin G/H synthase 1	PTGS1	P23219
MOL000261	Myristicin	TAR00007	D	DRD1	P21728
MOL000261	Myristicin	TAR00016	Muscarinic acetylcholine receptor M3	CHRM3	P20309
MOL000261	Myristicin	TAR00017	Prothrombin	F2	P00734
MOL000261	Myristicin	TAR00038	Muscarinic acetylcholine receptor M1	CHRM1	P11229
MOL000261	Myristicin	TAR00063	Beta-1 adrenergic receptor	ADRB1	P08588
MOL000261	Myristicin	TAR00070	Sodium channel protein type 5 subunit alpha	SCN5A	Q14524
MOL000261	Myristicin	TAR00094	Prostaglandin G/H synthase 2	PTGS2	P35354
MOL000261	Myristicin	TAR00095	Nitric oxide synthase, endothelial	NOS3	P29474
MOL000261	Myristicin	TAR00105	Alpha-2A adrenergic receptor	ADRA2A	P08913
MOL000261	Myristicin	TAR00117	Carbonic anhydrase 2	CA2	P00918
MOL000261	Myristicin	TAR00126	Alpha-2C adrenergic receptor	ADRA2C	P18825
MOL000261	Myristicin	TAR00141	Gamma-aminobutyric acid receptor subunit alpha-2	GABRA2	P47869
MOL000261	Myristicin	TAR00165	Acetylcholinesterase	ACHE	P22303
MOL000261	Myristicin	TAR00172	cGMP-inhibited 3',5'-cyclic phosphodiesterase A	PDE3A	Q14432
MOL000261	Myristicin	TAR00175	5-hydroxytryptamine receptor 2A	HTR2A	P28223
MOL000261	Myristicin	TAR00186	Sodium-dependent noradrenaline transporter	SLC6A2	P23975
MOL000261	Myristicin	TAR00191	Alpha-1A adrenergic receptor	ADRA1A	P35348
MOL000261	Myristicin	TAR00200	Gamma-aminobutyric acid receptor subunit alpha-3	GABRA3	P34903
MOL000261	Myristicin	TAR00210	Muscarinic acetylcholine receptor M2	CHRM2	P08172
MOL000261	Myristicin	TAR00214	Alpha-2B adrenergic receptor	ADRA2B	P18089
MOL000261	Myristicin	TAR00216	Alpha-1B adrenergic receptor	ADRA1B	P35368
MOL000261	Myristicin	TAR00239	Sodium-dependent dopamine transporter	SLC6A3	Q01959
MOL000261	Myristicin	TAR00261	Beta-2 adrenergic receptor	ADRB2	P07550
MOL000261	Myristicin	TAR00272	Alpha-1D adrenergic receptor	ADRA1D	P25100
MOL000261	Myristicin	TAR00290	Sodium-dependent serotonin transporter	SLC6A4	P31645
MOL000261	Myristicin	TAR00309	Gamma-aminobutyric acid receptor subunit alpha-1	GABRA1	P14867
MOL000261	Myristicin	TAR00332	Dipeptidyl peptidase 4	DPP4	P27487
MOL000261	Myristicin	TAR00482	Cyclin-dependent kinase 2	CDK2	P24941
MOL000261	Myristicin	TAR00499	Endoribonuclease LACTB2	LACTB2	Q53H82
MOL000261	Myristicin	TAR00521	Leukotriene A-4 hydrolase	LTA4H	P09960
MOL000261	Myristicin	TAR00565	Amine oxidase [flavin-containing] B	MAOB	P27338
MOL000261	Myristicin	TAR02928	Trypsin-1	PRSS1	P07477
MOL000261	Myristicin	TAR03586	cAMP-dependent protein kinase inhibitor alpha	PKIA	P61925
MOL000263	oleanolic acid	TAR00470	NAD	NQO1	P15559
MOL000263	oleanolic acid	TAR00622	Pancreatic alpha-amylase	AMY2A	P04746
MOL000263	oleanolic acid	TAR02132	Heme oxygenase 1	HMOX1	P09601
MOL000263	oleanolic acid	TAR00046	Estrogen receptor	ESR1	P03372
MOL000263	oleanolic acid	TAR00048	Androgen receptor	AR	P10275
MOL000263	oleanolic acid	TAR00308	Glucocorticoid receptor	NR3C1	P04150
MOL000264	Tereben	TAR00016	Muscarinic acetylcholine receptor M3	CHRM3	P20309
MOL000264	Tereben	TAR00017	Prothrombin	F2	P00734
MOL000264	Tereben	TAR00038	Muscarinic acetylcholine receptor M1	CHRM1	P11229
MOL000264	Tereben	TAR00048	Androgen receptor	AR	P10275
MOL000264	Tereben	TAR00094	Prostaglandin G/H synthase 2	PTGS2	P35354
MOL000264	Tereben	TAR00095	Nitric oxide synthase, endothelial	NOS3	P29474
MOL000264	Tereben	TAR00117	Carbonic anhydrase 2	CA2	P00918
MOL000264	Tereben	TAR00141	Gamma-aminobutyric acid receptor subunit alpha-2	GABRA2	P47869
MOL000264	Tereben	TAR00165	Acetylcholinesterase	ACHE	P22303
MOL000264	Tereben	TAR00181	Gamma-aminobutyric acid receptor subunit alpha-5	GABRA5	P31644
MOL000264	Tereben	TAR00186	Sodium-dependent noradrenaline transporter	SLC6A2	P23975
MOL000264	Tereben	TAR00200	Gamma-aminobutyric acid receptor subunit alpha-3	GABRA3	P34903
MOL000264	Tereben	TAR00210	Muscarinic acetylcholine receptor M2	CHRM2	P08172
MOL000264	Tereben	TAR00284	Neuronal acetylcholine receptor subunit alpha-2	CHRNA2	Q15822
MOL000264	Tereben	TAR00308	Glucocorticoid receptor	NR3C1	P04150
MOL000264	Tereben	TAR00309	Gamma-aminobutyric acid receptor subunit alpha-1	GABRA1	P14867
MOL000264	Tereben	TAR00332	Dipeptidyl peptidase 4	DPP4	P27487
MOL000264	Tereben	TAR00726	Alcohol dehydrogenase 1B	ADH1B	P00325
MOL000264	Tereben	TAR00727	Alcohol dehydrogenase 1C	ADH1C	P00326
MOL000264	Tereben	TAR00729	Alcohol dehydrogenase 1A	ADH1A	P07327
MOL000264	Tereben	TAR01201	Immunoglobulin heavy constant gamma 1	IGHG1	P01857
MOL000264	Tereben	TAR02928	Trypsin-1	PRSS1	P07477
MOL000264	Tereben	TAR03284	Gamma-aminobutyric acid receptor subunit alpha-6	GABRA6	Q16445
MOL000268	(1S,5S)-1-isopropyl-4-methylenebicyclo[3.1.0]hexane	TAR00017	Prothrombin	F2	P00734
MOL000268	(1S,5S)-1-isopropyl-4-methylenebicyclo[3.1.0]hexane	TAR00046	Estrogen receptor	ESR1	P03372
MOL000268	(1S,5S)-1-isopropyl-4-methylenebicyclo[3.1.0]hexane	TAR00048	Androgen receptor	AR	P10275
MOL000268	(1S,5S)-1-isopropyl-4-methylenebicyclo[3.1.0]hexane	TAR00094	Prostaglandin G/H synthase 2	PTGS2	P35354
MOL000268	(1S,5S)-1-isopropyl-4-methylenebicyclo[3.1.0]hexane	TAR00117	Carbonic anhydrase 2	CA2	P00918
MOL000268	(1S,5S)-1-isopropyl-4-methylenebicyclo[3.1.0]hexane	TAR00141	Gamma-aminobutyric acid receptor subunit alpha-2	GABRA2	P47869
MOL000268	(1S,5S)-1-isopropyl-4-methylenebicyclo[3.1.0]hexane	TAR00158	Retinoic acid receptor RXR-alpha	RXRA	P19793
MOL000268	(1S,5S)-1-isopropyl-4-methylenebicyclo[3.1.0]hexane	TAR00165	Acetylcholinesterase	ACHE	P22303
MOL000268	(1S,5S)-1-isopropyl-4-methylenebicyclo[3.1.0]hexane	TAR00209	Progesterone receptor	PGR	P06401
MOL000268	(1S,5S)-1-isopropyl-4-methylenebicyclo[3.1.0]hexane	TAR00308	Glucocorticoid receptor	NR3C1	P04150
MOL000268	(1S,5S)-1-isopropyl-4-methylenebicyclo[3.1.0]hexane	TAR00309	Gamma-aminobutyric acid receptor subunit alpha-1	GABRA1	P14867
MOL000268	(1S,5S)-1-isopropyl-4-methylenebicyclo[3.1.0]hexane	TAR00332	Dipeptidyl peptidase 4	DPP4	P27487
MOL000268	(1S,5S)-1-isopropyl-4-methylenebicyclo[3.1.0]hexane	TAR02928	Trypsin-1	PRSS1	P07477
MOL000268	(1S,5S)-1-isopropyl-4-methylenebicyclo[3.1.0]hexane	TAR03276	Nuclear receptor coactivator 2	NCOA2	Q15596
MOL000269	Elemicin	TAR00006	Prostaglandin G/H synthase 1	PTGS1	P23219
MOL000269	Elemicin	TAR00016	Muscarinic acetylcholine receptor M3	CHRM3	P20309
MOL000269	Elemicin	TAR00038	Muscarinic acetylcholine receptor M1	CHRM1	P11229
MOL000269	Elemicin	TAR00063	Beta-1 adrenergic receptor	ADRB1	P08588
MOL000269	Elemicin	TAR00070	Sodium channel protein type 5 subunit alpha	SCN5A	Q14524
MOL000269	Elemicin	TAR00094	Prostaglandin G/H synthase 2	PTGS2	P35354
MOL000269	Elemicin	TAR00105	Alpha-2A adrenergic receptor	ADRA2A	P08913
MOL000269	Elemicin	TAR00106	5-hydroxytryptamine receptor 1A	HTR1A	P08908
MOL000269	Elemicin	TAR00126	Alpha-2C adrenergic receptor	ADRA2C	P18825
MOL000269	Elemicin	TAR00172	cGMP-inhibited 3',5'-cyclic phosphodiesterase A	PDE3A	Q14432
MOL000269	Elemicin	TAR00175	5-hydroxytryptamine receptor 2A	HTR2A	P28223
MOL000269	Elemicin	TAR00186	Sodium-dependent noradrenaline transporter	SLC6A2	P23975
MOL000269	Elemicin	TAR00191	Alpha-1A adrenergic receptor	ADRA1A	P35348
MOL000269	Elemicin	TAR00210	Muscarinic acetylcholine receptor M2	CHRM2	P08172
MOL000269	Elemicin	TAR00214	Alpha-2B adrenergic receptor	ADRA2B	P18089
MOL000269	Elemicin	TAR00216	Alpha-1B adrenergic receptor	ADRA1B	P35368
MOL000269	Elemicin	TAR00239	Sodium-dependent dopamine transporter	SLC6A3	Q01959
MOL000269	Elemicin	TAR00261	Beta-2 adrenergic receptor	ADRB2	P07550
MOL000269	Elemicin	TAR00290	Sodium-dependent serotonin transporter	SLC6A4	P31645
MOL000269	Elemicin	TAR00309	Gamma-aminobutyric acid receptor subunit alpha-1	GABRA1	P14867
MOL000269	Elemicin	TAR00332	Dipeptidyl peptidase 4	DPP4	P27487
MOL000269	Elemicin	TAR00521	Leukotriene A-4 hydrolase	LTA4H	P09960
MOL000269	Elemicin	TAR03216	Glutamate receptor 2	GRIA2	P42262
12

## Sheet: Rougui
The details of targets from compounds in Rougui
Molecule ID	Molecule Name	Target ID	Target Protein Name	Gene Symbol	Uniprot ID
MOL000024	alpha-humulene	TAR00265	Tumor necrosis factor	TNF	P01375
MOL000024	alpha-humulene	TAR00418	Interleukin-1 beta	IL1B	P01584
MOL000024	alpha-humulene	TAR00017	Prothrombin	F2	P00734
MOL000024	alpha-humulene	TAR00094	Prostaglandin G/H synthase 2	PTGS2	P35354
MOL000024	alpha-humulene	TAR00095	Nitric oxide synthase, endothelial	NOS3	P29474
MOL000024	alpha-humulene	TAR00099	Renin	REN	P00797
MOL000024	alpha-humulene	TAR00117	Carbonic anhydrase 2	CA2	P00918
MOL000024	alpha-humulene	TAR00165	Acetylcholinesterase	ACHE	P22303
MOL000024	alpha-humulene	TAR00186	Sodium-dependent noradrenaline transporter	SLC6A2	P23975
MOL000024	alpha-humulene	TAR00309	Gamma-aminobutyric acid receptor subunit alpha-1	GABRA1	P14867
MOL000024	alpha-humulene	TAR00332	Dipeptidyl peptidase 4	DPP4	P27487
MOL000024	alpha-humulene	TAR00726	Alcohol dehydrogenase 1B	ADH1B	P00325
MOL000024	alpha-humulene	TAR00727	Alcohol dehydrogenase 1C	ADH1C	P00326
MOL000024	alpha-humulene	TAR02928	Trypsin-1	PRSS1	P07477
MOL000024	alpha-humulene	TAR03276	Nuclear receptor coactivator 2	NCOA2	Q15596
MOL000035	beta-Selinene	TAR00006	Prostaglandin G/H synthase 1	PTGS1	P23219
MOL000035	beta-Selinene	TAR00016	Muscarinic acetylcholine receptor M3	CHRM3	P20309
MOL000035	beta-Selinene	TAR00017	Prothrombin	F2	P00734
MOL000035	beta-Selinene	TAR00038	Muscarinic acetylcholine receptor M1	CHRM1	P11229
MOL000035	beta-Selinene	TAR00046	Estrogen receptor	ESR1	P03372
MOL000035	beta-Selinene	TAR00094	Prostaglandin G/H synthase 2	PTGS2	P35354
MOL000035	beta-Selinene	TAR00095	Nitric oxide synthase, endothelial	NOS3	P29474
MOL000035	beta-Selinene	TAR00141	Gamma-aminobutyric acid receptor subunit alpha-2	GABRA2	P47869
MOL000035	beta-Selinene	TAR00158	Retinoic acid receptor RXR-alpha	RXRA	P19793
MOL000035	beta-Selinene	TAR00165	Acetylcholinesterase	ACHE	P22303
MOL000035	beta-Selinene	TAR00186	Sodium-dependent noradrenaline transporter	SLC6A2	P23975
MOL000035	beta-Selinene	TAR00200	Gamma-aminobutyric acid receptor subunit alpha-3	GABRA3	P34903
MOL000035	beta-Selinene	TAR00210	Muscarinic acetylcholine receptor M2	CHRM2	P08172
MOL000035	beta-Selinene	TAR00216	Alpha-1B adrenergic receptor	ADRA1B	P35368
MOL000035	beta-Selinene	TAR00309	Gamma-aminobutyric acid receptor subunit alpha-1	GABRA1	P14867
MOL000035	beta-Selinene	TAR00332	Dipeptidyl peptidase 4	DPP4	P27487
MOL000035	beta-Selinene	TAR00499	Endoribonuclease LACTB2	LACTB2	Q53H82
MOL000035	beta-Selinene	TAR02928	Trypsin-1	PRSS1	P07477
MOL000035	beta-Selinene	TAR03276	Nuclear receptor coactivator 2	NCOA2	Q15596
MOL000035	beta-Selinene	TAR03284	Gamma-aminobutyric acid receptor subunit alpha-6	GABRA6	Q16445
MOL000019	D-Camphene	TAR00017	Prothrombin	F2	P00734
MOL000019	D-Camphene	TAR00037	Potassium voltage-gated channel subfamily H member 2	KCNH2	Q12809
MOL000019	D-Camphene	TAR00046	Estrogen receptor	ESR1	P03372
MOL000019	D-Camphene	TAR00048	Androgen receptor	AR	P10275
MOL000019	D-Camphene	TAR00070	Sodium channel protein type 5 subunit alpha	SCN5A	Q14524
MOL000019	D-Camphene	TAR00079	Coagulation factor X	F10	P00742
MOL000019	D-Camphene	TAR00094	Prostaglandin G/H synthase 2	PTGS2	P35354
MOL000019	D-Camphene	TAR00141	Gamma-aminobutyric acid receptor subunit alpha-2	GABRA2	P47869
MOL000019	D-Camphene	TAR00165	Acetylcholinesterase	ACHE	P22303
MOL000019	D-Camphene	TAR00307	Estrogen receptor beta	ESR2	Q92731
MOL000019	D-Camphene	TAR00309	Gamma-aminobutyric acid receptor subunit alpha-1	GABRA1	P14867
MOL000019	D-Camphene	TAR00332	Dipeptidyl peptidase 4	DPP4	P27487
MOL000019	D-Camphene	TAR00422	Glycogen synthase kinase-3 beta	GSK3B	P49841
MOL000019	D-Camphene	TAR02928	Trypsin-1	PRSS1	P07477
MOL000019	D-Camphene	TAR02966	Serine/threonine-protein kinase pim-1	PIM1	P11309
MOL000019	D-Camphene	TAR03276	Nuclear receptor coactivator 2	NCOA2	Q15596
MOL000019	D-Camphene	TAR03727	Calcium-activated potassium channel subunit alpha-1	KCNMA1	Q12791
MOL000057	DIBP	TAR00016	Muscarinic acetylcholine receptor M3	CHRM3	P20309
MOL000057	DIBP	TAR00038	Muscarinic acetylcholine receptor M1	CHRM1	P11229
MOL000057	DIBP	TAR00046	Estrogen receptor	ESR1	P03372
MOL000057	DIBP	TAR00048	Androgen receptor	AR	P10275
MOL000057	DIBP	TAR00158	Retinoic acid receptor RXR-alpha	RXRA	P19793
MOL000057	DIBP	TAR00175	5-hydroxytryptamine receptor 2A	HTR2A	P28223
MOL000057	DIBP	TAR00186	Sodium-dependent noradrenaline transporter	SLC6A2	P23975
MOL000057	DIBP	TAR00209	Progesterone receptor	PGR	P06401
MOL000057	DIBP	TAR00210	Muscarinic acetylcholine receptor M2	CHRM2	P08172
MOL000057	DIBP	TAR00239	Sodium-dependent dopamine transporter	SLC6A3	Q01959
MOL000057	DIBP	TAR00252	Mineralocorticoid receptor	NR3C2	P08235
MOL000057	DIBP	TAR00261	Beta-2 adrenergic receptor	ADRB2	P07550
MOL000057	DIBP	TAR00290	Sodium-dependent serotonin transporter	SLC6A4	P31645
MOL000057	DIBP	TAR00308	Glucocorticoid receptor	NR3C1	P04150
MOL000057	DIBP	TAR00309	Gamma-aminobutyric acid receptor subunit alpha-1	GABRA1	P14867
MOL000057	DIBP	TAR03276	Nuclear receptor coactivator 2	NCOA2	Q15596
MOL000118	(L)-alpha-Terpineol	TAR00003	Nitric oxide synthase, inducible	NOS2	P35228
MOL000118	(L)-alpha-Terpineol	TAR00006	Prostaglandin G/H synthase 1	PTGS1	P23219
MOL000118	(L)-alpha-Terpineol	TAR00016	Muscarinic acetylcholine receptor M3	CHRM3	P20309
MOL000118	(L)-alpha-Terpineol	TAR00017	Prothrombin	F2	P00734
MOL000118	(L)-alpha-Terpineol	TAR00038	Muscarinic acetylcholine receptor M1	CHRM1	P11229
MOL000118	(L)-alpha-Terpineol	TAR00046	Estrogen receptor	ESR1	P03372
MOL000118	(L)-alpha-Terpineol	TAR00048	Androgen receptor	AR	P10275
MOL000118	(L)-alpha-Terpineol	TAR00070	Sodium channel protein type 5 subunit alpha	SCN5A	Q14524
MOL000118	(L)-alpha-Terpineol	TAR00078	Peroxisome proliferator-activated receptor gamma	PPARG	P37231
MOL000118	(L)-alpha-Terpineol	TAR00079	Coagulation factor X	F10	P00742
MOL000118	(L)-alpha-Terpineol	TAR00094	Prostaglandin G/H synthase 2	PTGS2	P35354
MOL000118	(L)-alpha-Terpineol	TAR00095	Nitric oxide synthase, endothelial	NOS3	P29474
MOL000118	(L)-alpha-Terpineol	TAR00141	Gamma-aminobutyric acid receptor subunit alpha-2	GABRA2	P47869
MOL000118	(L)-alpha-Terpineol	TAR00165	Acetylcholinesterase	ACHE	P22303
MOL000118	(L)-alpha-Terpineol	TAR00181	Gamma-aminobutyric acid receptor subunit alpha-5	GABRA5	P31644
MOL000118	(L)-alpha-Terpineol	TAR00186	Sodium-dependent noradrenaline transporter	SLC6A2	P23975
MOL000118	(L)-alpha-Terpineol	TAR00191	Alpha-1A adrenergic receptor	ADRA1A	P35348
MOL000118	(L)-alpha-Terpineol	TAR00200	Gamma-aminobutyric acid receptor subunit alpha-3	GABRA3	P34903
MOL000118	(L)-alpha-Terpineol	TAR00210	Muscarinic acetylcholine receptor M2	CHRM2	P08172
MOL000118	(L)-alpha-Terpineol	TAR00216	Alpha-1B adrenergic receptor	ADRA1B	P35368
MOL000118	(L)-alpha-Terpineol	TAR00239	Sodium-dependent dopamine transporter	SLC6A3	Q01959
MOL000118	(L)-alpha-Terpineol	TAR00307	Estrogen receptor beta	ESR2	Q92731
MOL000118	(L)-alpha-Terpineol	TAR00309	Gamma-aminobutyric acid receptor subunit alpha-1	GABRA1	P14867
MOL000118	(L)-alpha-Terpineol	TAR00332	Dipeptidyl peptidase 4	DPP4	P27487
MOL000118	(L)-alpha-Terpineol	TAR00422	Glycogen synthase kinase-3 beta	GSK3B	P49841
MOL000118	(L)-alpha-Terpineol	TAR00647	Serine/threonine-protein kinase Chk1	CHEK1	O14757
MOL000118	(L)-alpha-Terpineol	TAR01201	Immunoglobulin heavy constant gamma 1	IGHG1	P01857
MOL000118	(L)-alpha-Terpineol	TAR02928	Trypsin-1	PRSS1	P07477
MOL000118	(L)-alpha-Terpineol	TAR02966	Serine/threonine-protein kinase pim-1	PIM1	P11309
MOL000118	(L)-alpha-Terpineol	TAR03025	Cyclin-A2	CCNA2	P20248
MOL000118	(L)-alpha-Terpineol	TAR03276	Nuclear receptor coactivator 2	NCOA2	Q15596
MOL000118	(L)-alpha-Terpineol	TAR03284	Gamma-aminobutyric acid receptor subunit alpha-6	GABRA6	Q16445
MOL000118	(L)-alpha-Terpineol	TAR03727	Calcium-activated potassium channel subunit alpha-1	KCNMA1	Q12791
MOL000122	1,8-cineole	TAR00017	Prothrombin	F2	P00734
MOL000122	1,8-cineole	TAR00094	Prostaglandin G/H synthase 2	PTGS2	P35354
MOL000122	1,8-cineole	TAR00095	Nitric oxide synthase, endothelial	NOS3	P29474
MOL000122	1,8-cineole	TAR00117	Carbonic anhydrase 2	CA2	P00918
MOL000122	1,8-cineole	TAR00141	Gamma-aminobutyric acid receptor subunit alpha-2	GABRA2	P47869
MOL000122	1,8-cineole	TAR00165	Acetylcholinesterase	ACHE	P22303
MOL000122	1,8-cineole	TAR00181	Gamma-aminobutyric acid receptor subunit alpha-5	GABRA5	P31644
MOL000122	1,8-cineole	TAR00200	Gamma-aminobutyric acid receptor subunit alpha-3	GABRA3	P34903
MOL000122	1,8-cineole	TAR00284	Neuronal acetylcholine receptor subunit alpha-2	CHRNA2	Q15822
MOL000122	1,8-cineole	TAR00309	Gamma-aminobutyric acid receptor subunit alpha-1	GABRA1	P14867
MOL000122	1,8-cineole	TAR00332	Dipeptidyl peptidase 4	DPP4	P27487
MOL000122	1,8-cineole	TAR00726	Alcohol dehydrogenase 1B	ADH1B	P00325
MOL000122	1,8-cineole	TAR00727	Alcohol dehydrogenase 1C	ADH1C	P00326
MOL000122	1,8-cineole	TAR02928	Trypsin-1	PRSS1	P07477
MOL000125	(-)-alpha-Pinene	TAR00141	Gamma-aminobutyric acid receptor subunit alpha-2	GABRA2	P47869
MOL000125	(-)-alpha-Pinene	TAR00165	Acetylcholinesterase	ACHE	P22303
MOL000125	(-)-alpha-Pinene	TAR00309	Gamma-aminobutyric acid receptor subunit alpha-1	GABRA1	P14867
MOL000125	(-)-alpha-Pinene	TAR00332	Dipeptidyl peptidase 4	DPP4	P27487
MOL000125	(-)-alpha-Pinene	TAR00422	Glycogen synthase kinase-3 beta	GSK3B	P49841
MOL000125	(-)-alpha-Pinene	TAR02928	Trypsin-1	PRSS1	P07477
MOL000126	(-)-nopinene	TAR00006	Prostaglandin G/H synthase 1	PTGS1	P23219
MOL000126	(-)-nopinene	TAR00016	Muscarinic acetylcholine receptor M3	CHRM3	P20309
MOL000126	(-)-nopinene	TAR00017	Prothrombin	F2	P00734
MOL000126	(-)-nopinene	TAR00038	Muscarinic acetylcholine receptor M1	CHRM1	P11229
MOL000126	(-)-nopinene	TAR00046	Estrogen receptor	ESR1	P03372
MOL000126	(-)-nopinene	TAR00094	Prostaglandin G/H synthase 2	PTGS2	P35354
MOL000126	(-)-nopinene	TAR00117	Carbonic anhydrase 2	CA2	P00918
MOL000126	(-)-nopinene	TAR00126	Alpha-2C adrenergic receptor	ADRA2C	P18825
MOL000126	(-)-nopinene	TAR00141	Gamma-aminobutyric acid receptor subunit alpha-2	GABRA2	P47869
MOL000126	(-)-nopinene	TAR00158	Retinoic acid receptor RXR-alpha	RXRA	P19793
MOL000126	(-)-nopinene	TAR00165	Acetylcholinesterase	ACHE	P22303
MOL000126	(-)-nopinene	TAR00181	Gamma-aminobutyric acid receptor subunit alpha-5	GABRA5	P31644
MOL000126	(-)-nopinene	TAR00186	Sodium-dependent noradrenaline transporter	SLC6A2	P23975
MOL000126	(-)-nopinene	TAR00191	Alpha-1A adrenergic receptor	ADRA1A	P35348
MOL000126	(-)-nopinene	TAR00200	Gamma-aminobutyric acid receptor subunit alpha-3	GABRA3	P34903
MOL000126	(-)-nopinene	TAR00210	Muscarinic acetylcholine receptor M2	CHRM2	P08172
MOL000126	(-)-nopinene	TAR00216	Alpha-1B adrenergic receptor	ADRA1B	P35368
MOL000126	(-)-nopinene	TAR00239	Sodium-dependent dopamine transporter	SLC6A3	Q01959
MOL000126	(-)-nopinene	TAR00284	Neuronal acetylcholine receptor subunit alpha-2	CHRNA2	Q15822
MOL000126	(-)-nopinene	TAR00309	Gamma-aminobutyric acid receptor subunit alpha-1	GABRA1	P14867
MOL000126	(-)-nopinene	TAR00332	Dipeptidyl peptidase 4	DPP4	P27487
MOL000126	(-)-nopinene	TAR00499	Endoribonuclease LACTB2	LACTB2	Q53H82
MOL000126	(-)-nopinene	TAR00566	Amine oxidase [flavin-containing] A	MAOA	P21397
MOL000126	(-)-nopinene	TAR01172	Lysozyme C	LYZ	P61626
MOL000126	(-)-nopinene	TAR02928	Trypsin-1	PRSS1	P07477
MOL000126	(-)-nopinene	TAR03276	Nuclear receptor coactivator 2	NCOA2	Q15596
MOL000126	(-)-nopinene	TAR03284	Gamma-aminobutyric acid receptor subunit alpha-6	GABRA6	Q16445
MOL000130	CAM	TAR00038	Muscarinic acetylcholine receptor M1	CHRM1	P11229
MOL000130	CAM	TAR00141	Gamma-aminobutyric acid receptor subunit alpha-2	GABRA2	P47869
MOL000130	CAM	TAR00210	Muscarinic acetylcholine receptor M2	CHRM2	P08172
MOL000130	CAM	TAR02928	Trypsin-1	PRSS1	P07477
MOL000131	EIC	TAR00003	Nitric oxide synthase, inducible	NOS2	P35228
MOL000131	EIC	TAR00006	Prostaglandin G/H synthase 1	PTGS1	P23219
MOL000131	EIC	TAR00017	Prothrombin	F2	P00734
MOL000131	EIC	TAR00038	Muscarinic acetylcholine receptor M1	CHRM1	P11229
MOL000131	EIC	TAR00046	Estrogen receptor	ESR1	P03372
MOL000131	EIC	TAR00078	Peroxisome proliferator-activated receptor gamma	PPARG	P37231
MOL000131	EIC	TAR00094	Prostaglandin G/H synthase 2	PTGS2	P35354
MOL000131	EIC	TAR00095	Nitric oxide synthase, endothelial	NOS3	P29474
MOL000131	EIC	TAR00117	Carbonic anhydrase 2	CA2	P00918
MOL000131	EIC	TAR00141	Gamma-aminobutyric acid receptor subunit alpha-2	GABRA2	P47869
MOL000131	EIC	TAR00158	Retinoic acid receptor RXR-alpha	RXRA	P19793
MOL000131	EIC	TAR00165	Acetylcholinesterase	ACHE	P22303
MOL000131	EIC	TAR00186	Sodium-dependent noradrenaline transporter	SLC6A2	P23975
MOL000131	EIC	TAR00210	Muscarinic acetylcholine receptor M2	CHRM2	P08172
MOL000131	EIC	TAR00309	Gamma-aminobutyric acid receptor subunit alpha-1	GABRA1	P14867
MOL000131	EIC	TAR00332	Dipeptidyl peptidase 4	DPP4	P27487
MOL000131	EIC	TAR00404	Transient receptor potential cation channel subfamily V member 1	TRPV1	Q8NER1
MOL000131	EIC	TAR01172	Lysozyme C	LYZ	P61626
MOL000131	EIC	TAR01201	Immunoglobulin heavy constant gamma 1	IGHG1	P01857
MOL000131	EIC	TAR02928	Trypsin-1	PRSS1	P07477
MOL000131	EIC	TAR03276	Nuclear receptor coactivator 2	NCOA2	Q15596
MOL000131	EIC	TAR03284	Gamma-aminobutyric acid receptor subunit alpha-6	GABRA6	Q16445
MOL000202	Moslene	TAR00094	Prostaglandin G/H synthase 2	PTGS2	P35354
MOL000202	Moslene	TAR00095	Nitric oxide synthase, endothelial	NOS3	P29474
MOL000202	Moslene	TAR00165	Acetylcholinesterase	ACHE	P22303
MOL000202	Moslene	TAR00309	Gamma-aminobutyric acid receptor subunit alpha-1	GABRA1	P14867
MOL000202	Moslene	TAR00332	Dipeptidyl peptidase 4	DPP4	P27487
MOL000202	Moslene	TAR00726	Alcohol dehydrogenase 1B	ADH1B	P00325
MOL000202	Moslene	TAR00727	Alcohol dehydrogenase 1C	ADH1C	P00326
MOL000202	Moslene	TAR00729	Alcohol dehydrogenase 1A	ADH1A	P07327
MOL000202	Moslene	TAR02928	Trypsin-1	PRSS1	P07477
MOL000208	()-Aromadendrene	TAR00016	Muscarinic acetylcholine receptor M3	CHRM3	P20309
MOL000208	()-Aromadendrene	TAR00038	Muscarinic acetylcholine receptor M1	CHRM1	P11229
MOL000208	()-Aromadendrene	TAR00046	Estrogen receptor	ESR1	P03372
MOL000208	()-Aromadendrene	TAR00117	Carbonic anhydrase 2	CA2	P00918
MOL000208	()-Aromadendrene	TAR00165	Acetylcholinesterase	ACHE	P22303
MOL000208	()-Aromadendrene	TAR00210	Muscarinic acetylcholine receptor M2	CHRM2	P08172
MOL000208	()-Aromadendrene	TAR00332	Dipeptidyl peptidase 4	DPP4	P27487
MOL000208	()-Aromadendrene	TAR00727	Alcohol dehydrogenase 1C	ADH1C	P00326
MOL000208	()-Aromadendrene	TAR01172	Lysozyme C	LYZ	P61626
MOL000208	()-Aromadendrene	TAR02928	Trypsin-1	PRSS1	P07477
MOL000219	BOX	TAR00016	Muscarinic acetylcholine receptor M3	CHRM3	P20309
MOL000219	BOX	TAR00017	Prothrombin	F2	P00734
MOL000219	BOX	TAR00046	Estrogen receptor	ESR1	P03372
MOL000219	BOX	TAR00094	Prostaglandin G/H synthase 2	PTGS2	P35354
MOL000219	BOX	TAR00117	Carbonic anhydrase 2	CA2	P00918
MOL000219	BOX	TAR00141	Gamma-aminobutyric acid receptor subunit alpha-2	GABRA2	P47869
MOL000219	BOX	TAR00158	Retinoic acid receptor RXR-alpha	RXRA	P19793
MOL000219	BOX	TAR00165	Acetylcholinesterase	ACHE	P22303
MOL000219	BOX	TAR00309	Gamma-aminobutyric acid receptor subunit alpha-1	GABRA1	P14867
MOL000219	BOX	TAR00332	Dipeptidyl peptidase 4	DPP4	P27487
MOL000219	BOX	TAR00482	Cyclin-dependent kinase 2	CDK2	P24941
MOL000219	BOX	TAR00565	Amine oxidase [flavin-containing] B	MAOB	P27338
MOL000219	BOX	TAR00726	Alcohol dehydrogenase 1B	ADH1B	P00325
MOL000219	BOX	TAR00727	Alcohol dehydrogenase 1C	ADH1C	P00326
MOL000219	BOX	TAR00729	Alcohol dehydrogenase 1A	ADH1A	P07327
MOL000219	BOX	TAR01172	Lysozyme C	LYZ	P61626
MOL000219	BOX	TAR02928	Trypsin-1	PRSS1	P07477
MOL000219	BOX	TAR02992	D-amino-acid oxidase	DAO	P14920
MOL000219	BOX	TAR03276	Nuclear receptor coactivator 2	NCOA2	Q15596
MOL000219	BOX	TAR03485	Group IIE secretory phospholipase A2	PLA2G2E	Q9NZK7
MOL000219	BOX	TAR03952	Trypsin-3	PRSS3	P35030
MOL000234	L-Limonen	TAR00094	Prostaglandin G/H synthase 2	PTGS2	P35354
MOL000234	L-Limonen	TAR00095	Nitric oxide synthase, endothelial	NOS3	P29474
MOL000234	L-Limonen	TAR00165	Acetylcholinesterase	ACHE	P22303
MOL000234	L-Limonen	TAR00309	Gamma-aminobutyric acid receptor subunit alpha-1	GABRA1	P14867
MOL000234	L-Limonen	TAR00332	Dipeptidyl peptidase 4	DPP4	P27487
MOL000234	L-Limonen	TAR00726	Alcohol dehydrogenase 1B	ADH1B	P00325
MOL000234	L-Limonen	TAR00727	Alcohol dehydrogenase 1C	ADH1C	P00326
MOL000234	L-Limonen	TAR02928	Trypsin-1	PRSS1	P07477
MOL000254	eugenol	TAR00003	Nitric oxide synthase, inducible	NOS2	P35228
MOL000254	eugenol	TAR00088	Arachidonate 5-lipoxygenase	ALOX5	P09917
MOL000254	eugenol	TAR00094	Prostaglandin G/H synthase 2	PTGS2	P35354
MOL000254	eugenol	TAR00325	T-lymphocyte activation antigen CD86	CD86	P42081
MOL000254	eugenol	TAR00565	Amine oxidase [flavin-containing] B	MAOB	P27338
MOL000254	eugenol	TAR00566	Amine oxidase [flavin-containing] A	MAOA	P21397
MOL000254	eugenol	TAR00651	Transient receptor potential cation channel subfamily V member 3	TRPV3	Q8NET8
MOL000254	eugenol	TAR03204	Aryl hydrocarbon receptor	AHR	P35869
MOL000254	eugenol	TAR03610	Calcium-transporting ATPase type 2C member 1	ATP2C1	P98194
MOL000254	eugenol	TAR03779	Quinone oxidoreductase	CRYZ	Q08257
MOL000254	eugenol	TAR03971	Serine/threonine-protein phosphatase 2B catalytic subunit alpha isoform	PPP3CA	Q08209
MOL000254	eugenol	TAR00006	Prostaglandin G/H synthase 1	PTGS1	P23219
MOL000254	eugenol	TAR00007	D	DRD1	P21728
MOL000254	eugenol	TAR00016	Muscarinic acetylcholine receptor M3	CHRM3	P20309
MOL000254	eugenol	TAR00017	Prothrombin	F2	P00734
MOL000254	eugenol	TAR00038	Muscarinic acetylcholine receptor M1	CHRM1	P11229
MOL000254	eugenol	TAR00063	Beta-1 adrenergic receptor	ADRB1	P08588
MOL000254	eugenol	TAR00070	Sodium channel protein type 5 subunit alpha	SCN5A	Q14524
MOL000254	eugenol	TAR00095	Nitric oxide synthase, endothelial	NOS3	P29474
MOL000254	eugenol	TAR00105	Alpha-2A adrenergic receptor	ADRA2A	P08913
MOL000254	eugenol	TAR00117	Carbonic anhydrase 2	CA2	P00918
MOL000254	eugenol	TAR00126	Alpha-2C adrenergic receptor	ADRA2C	P18825
MOL000254	eugenol	TAR00165	Acetylcholinesterase	ACHE	P22303
MOL000254	eugenol	TAR00186	Sodium-dependent noradrenaline transporter	SLC6A2	P23975
MOL000254	eugenol	TAR00191	Alpha-1A adrenergic receptor	ADRA1A	P35348
MOL000254	eugenol	TAR00210	Muscarinic acetylcholine receptor M2	CHRM2	P08172
MOL000254	eugenol	TAR00214	Alpha-2B adrenergic receptor	ADRA2B	P18089
MOL000254	eugenol	TAR00216	Alpha-1B adrenergic receptor	ADRA1B	P35368
MOL000254	eugenol	TAR00239	Sodium-dependent dopamine transporter	SLC6A3	Q01959
MOL000254	eugenol	TAR00261	Beta-2 adrenergic receptor	ADRB2	P07550
MOL000254	eugenol	TAR00272	Alpha-1D adrenergic receptor	ADRA1D	P25100
MOL000254	eugenol	TAR00332	Dipeptidyl peptidase 4	DPP4	P27487
MOL000254	eugenol	TAR00346	Urokinase-type plasminogen activator	PLAU	P00749
MOL000254	eugenol	TAR00499	Endoribonuclease LACTB2	LACTB2	Q53H82
MOL000254	eugenol	TAR00521	Leukotriene A-4 hydrolase	LTA4H	P09960
MOL000254	eugenol	TAR01172	Lysozyme C	LYZ	P61626
MOL000254	eugenol	TAR01696	Chymotrypsinogen B	CTRB1	P17538
MOL000254	eugenol	TAR02928	Trypsin-1	PRSS1	P07477
MOL000266	beta-Cubebene	TAR00003	Nitric oxide synthase, inducible	NOS2	P35228
MOL000266	beta-Cubebene	TAR00017	Prothrombin	F2	P00734
MOL000266	beta-Cubebene	TAR00038	Muscarinic acetylcholine receptor M1	CHRM1	P11229
MOL000266	beta-Cubebene	TAR00094	Prostaglandin G/H synthase 2	PTGS2	P35354
MOL000266	beta-Cubebene	TAR00095	Nitric oxide synthase, endothelial	NOS3	P29474
MOL000266	beta-Cubebene	TAR00165	Acetylcholinesterase	ACHE	P22303
MOL000266	beta-Cubebene	TAR00186	Sodium-dependent noradrenaline transporter	SLC6A2	P23975
MOL000266	beta-Cubebene	TAR00210	Muscarinic acetylcholine receptor M2	CHRM2	P08172
MOL000266	beta-Cubebene	TAR00284	Neuronal acetylcholine receptor subunit alpha-2	CHRNA2	Q15822
MOL000266	beta-Cubebene	TAR00309	Gamma-aminobutyric acid receptor subunit alpha-1	GABRA1	P14867
MOL000266	beta-Cubebene	TAR00332	Dipeptidyl peptidase 4	DPP4	P27487
MOL000266	beta-Cubebene	TAR00499	Endoribonuclease LACTB2	LACTB2	Q53H82
MOL000475	anethole	TAR00414	Transcription factor AP-1	JUN	P05412
MOL000475	anethole	TAR03978	Interleukin-2	IL2	P60568
MOL000475	anethole	TAR00038	Muscarinic acetylcholine receptor M1	CHRM1	P11229
MOL000475	anethole	TAR00099	Renin	REN	P00797
MOL000475	anethole	TAR00117	Carbonic anhydrase 2	CA2	P00918
MOL000475	anethole	TAR00126	Alpha-2C adrenergic receptor	ADRA2C	P18825
MOL000475	anethole	TAR00186	Sodium-dependent noradrenaline transporter	SLC6A2	P23975
MOL000475	anethole	TAR00191	Alpha-1A adrenergic receptor	ADRA1A	P35348
MOL000475	anethole	TAR00239	Sodium-dependent dopamine transporter	SLC6A3	Q01959
MOL000475	anethole	TAR00261	Beta-2 adrenergic receptor	ADRB2	P07550
MOL000475	anethole	TAR00332	Dipeptidyl peptidase 4	DPP4	P27487
MOL000475	anethole	TAR00499	Endoribonuclease LACTB2	LACTB2	Q53H82
MOL000475	anethole	TAR00565	Amine oxidase [flavin-containing] B	MAOB	P27338
MOL000475	anethole	TAR00566	Amine oxidase [flavin-containing] A	MAOA	P21397
MOL000475	anethole	TAR01172	Lysozyme C	LYZ	P61626
MOL000475	anethole	TAR02928	Trypsin-1	PRSS1	P07477
MOL000475	anethole	TAR03952	Trypsin-3	PRSS3	P35030
MOL000608	()-Terpinen-4-ol	TAR00016	Muscarinic acetylcholine receptor M3	CHRM3	P20309
MOL000608	()-Terpinen-4-ol	TAR00017	Prothrombin	F2	P00734
MOL000608	()-Terpinen-4-ol	TAR00038	Muscarinic acetylcholine receptor M1	CHRM1	P11229
MOL000608	()-Terpinen-4-ol	TAR00141	Gamma-aminobutyric acid receptor subunit alpha-2	GABRA2	P47869
MOL000608	()-Terpinen-4-ol	TAR00165	Acetylcholinesterase	ACHE	P22303
MOL000608	()-Terpinen-4-ol	TAR00181	Gamma-aminobutyric acid receptor subunit alpha-5	GABRA5	P31644
MOL000608	()-Terpinen-4-ol	TAR00186	Sodium-dependent noradrenaline transporter	SLC6A2	P23975
MOL000608	()-Terpinen-4-ol	TAR00200	Gamma-aminobutyric acid receptor subunit alpha-3	GABRA3	P34903
MOL000608	()-Terpinen-4-ol	TAR00210	Muscarinic acetylcholine receptor M2	CHRM2	P08172
MOL000608	()-Terpinen-4-ol	TAR00216	Alpha-1B adrenergic receptor	ADRA1B	P35368
MOL000608	()-Terpinen-4-ol	TAR00284	Neuronal acetylcholine receptor subunit alpha-2	CHRNA2	Q15822
MOL000608	()-Terpinen-4-ol	TAR00309	Gamma-aminobutyric acid receptor subunit alpha-1	GABRA1	P14867
MOL000608	()-Terpinen-4-ol	TAR00332	Dipeptidyl peptidase 4	DPP4	P27487
MOL000608	()-Terpinen-4-ol	TAR01201	Immunoglobulin heavy constant gamma 1	IGHG1	P01857
MOL000608	()-Terpinen-4-ol	TAR02928	Trypsin-1	PRSS1	P07477
MOL000608	()-Terpinen-4-ol	TAR03284	Gamma-aminobutyric acid receptor subunit alpha-6	GABRA6	Q16445
MOL000612	(-)-alpha-cedrene	TAR00016	Muscarinic acetylcholine receptor M3	CHRM3	P20309
MOL000612	(-)-alpha-cedrene	TAR00017	Prothrombin	F2	P00734
MOL000612	(-)-alpha-cedrene	TAR00038	Muscarinic acetylcholine receptor M1	CHRM1	P11229
MOL000612	(-)-alpha-cedrene	TAR00046	Estrogen receptor	ESR1	P03372
MOL000612	(-)-alpha-cedrene	TAR00094	Prostaglandin G/H synthase 2	PTGS2	P35354
MOL000612	(-)-alpha-cedrene	TAR00117	Carbonic anhydrase 2	CA2	P00918
MOL000612	(-)-alpha-cedrene	TAR00141	Gamma-aminobutyric acid receptor subunit alpha-2	GABRA2	P47869
MOL000612	(-)-alpha-cedrene	TAR00158	Retinoic acid receptor RXR-alpha	RXRA	P19793
MOL000612	(-)-alpha-cedrene	TAR00165	Acetylcholinesterase	ACHE	P22303
MOL000612	(-)-alpha-cedrene	TAR00309	Gamma-aminobutyric acid receptor subunit alpha-1	GABRA1	P14867
MOL000612	(-)-alpha-cedrene	TAR00332	Dipeptidyl peptidase 4	DPP4	P27487
MOL000612	(-)-alpha-cedrene	TAR00499	Endoribonuclease LACTB2	LACTB2	Q53H82
MOL000612	(-)-alpha-cedrene	TAR00726	Alcohol dehydrogenase 1B	ADH1B	P00325
MOL000612	(-)-alpha-cedrene	TAR00727	Alcohol dehydrogenase 1C	ADH1C	P00326
MOL000612	(-)-alpha-cedrene	TAR03276	Nuclear receptor coactivator 2	NCOA2	Q15596
MOL000675	oleic acid	TAR00003	Nitric oxide synthase, inducible	NOS2	P35228
MOL000675	oleic acid	TAR00076	Plasminogen	PLG	P00747
MOL000675	oleic acid	TAR00083	Lipoprotein lipase	LPL	P06858
MOL000675	oleic acid	TAR00346	Urokinase-type plasminogen activator	PLAU	P00749
MOL000675	oleic acid	TAR00357	Serum paraoxonase/arylesterase 1	PON1	P27169
MOL000675	oleic acid	TAR00428	Myeloperoxidase	MPO	P05164
MOL000675	oleic acid	TAR00578	Glutamyl aminopeptidase	ENPEP	Q07075
MOL000675	oleic acid	TAR00597	Superoxide dismutase [Cu-Zn]	SOD1	P00441
MOL000675	oleic acid	TAR00735	Catalase	CAT	P04040
MOL000675	oleic acid	TAR00768	BDNF/NT-3 growth factors receptor	NTRK2	Q16620
MOL000675	oleic acid	TAR01644	3-hydroxy-3-methylglutaryl-coenzyme A reductase	HMGCR	P04035
MOL000675	oleic acid	TAR02882	Insulin [Cleaved into: Insulin B chain; Insulin A chain]	INS	P01308
MOL000675	oleic acid	TAR02928	Trypsin-1	PRSS1	P07477
MOL000675	oleic acid	TAR03018	Peptidyl-glycine alpha-amidating monooxygenase	PAM	P19021
MOL000675	oleic acid	TAR03202	Sterol O-acyltransferase 1	SOAT1	P35610
MOL000675	oleic acid	TAR03754	Aspartyl aminopeptidase	DNPEP	Q9ULA0
MOL000675	oleic acid	TAR00006	Prostaglandin G/H synthase 1	PTGS1	P23219
MOL000675	oleic acid	TAR00017	Prothrombin	F2	P00734
MOL000675	oleic acid	TAR00078	Peroxisome proliferator-activated receptor gamma	PPARG	P37231
MOL000675	oleic acid	TAR00094	Prostaglandin G/H synthase 2	PTGS2	P35354
MOL000675	oleic acid	TAR00095	Nitric oxide synthase, endothelial	NOS3	P29474
MOL000675	oleic acid	TAR00117	Carbonic anhydrase 2	CA2	P00918
MOL000675	oleic acid	TAR00158	Retinoic acid receptor RXR-alpha	RXRA	P19793
MOL000675	oleic acid	TAR00165	Acetylcholinesterase	ACHE	P22303
MOL000675	oleic acid	TAR00332	Dipeptidyl peptidase 4	DPP4	P27487
MOL000675	oleic acid	TAR00482	Cyclin-dependent kinase 2	CDK2	P24941
MOL000675	oleic acid	TAR00726	Alcohol dehydrogenase 1B	ADH1B	P00325
MOL000675	oleic acid	TAR00727	Alcohol dehydrogenase 1C	ADH1C	P00326
MOL000675	oleic acid	TAR00729	Alcohol dehydrogenase 1A	ADH1A	P07327
MOL000675	oleic acid	TAR01172	Lysozyme C	LYZ	P61626
MOL000675	oleic acid	TAR03276	Nuclear receptor coactivator 2	NCOA2	Q15596
MOL000675	oleic acid	TAR03952	Trypsin-3	PRSS3	P35030
MOL000699	m-Cymol	TAR00186	Sodium-dependent noradrenaline transporter	SLC6A2	P23975
MOL000699	m-Cymol	TAR01172	Lysozyme C	LYZ	P61626
MOL000699	m-Cymol	TAR02928	Trypsin-1	PRSS1	P07477
MOL000911	Terpilene	TAR00003	Nitric oxide synthase, inducible	NOS2	P35228
MOL000911	Terpilene	TAR00006	Prostaglandin G/H synthase 1	PTGS1	P23219
MOL000911	Terpilene	TAR00017	Prothrombin	F2	P00734
MOL000911	Terpilene	TAR00038	Muscarinic acetylcholine receptor M1	CHRM1	P11229
MOL000911	Terpilene	TAR00046	Estrogen receptor	ESR1	P03372
MOL000911	Terpilene	TAR00048	Androgen receptor	AR	P10275
MOL000911	Terpilene	TAR00063	Beta-1 adrenergic receptor	ADRB1	P08588
MOL000911	Terpilene	TAR00094	Prostaglandin G/H synthase 2	PTGS2	P35354
MOL000911	Terpilene	TAR00095	Nitric oxide synthase, endothelial	NOS3	P29474
MOL000911	Terpilene	TAR00105	Alpha-2A adrenergic receptor	ADRA2A	P08913
MOL000911	Terpilene	TAR00117	Carbonic anhydrase 2	CA2	P00918
MOL000911	Terpilene	TAR00126	Alpha-2C adrenergic receptor	ADRA2C	P18825
MOL000911	Terpilene	TAR00158	Retinoic acid receptor RXR-alpha	RXRA	P19793
MOL000911	Terpilene	TAR00165	Acetylcholinesterase	ACHE	P22303
MOL000911	Terpilene	TAR00186	Sodium-dependent noradrenaline transporter	SLC6A2	P23975
MOL000911	Terpilene	TAR00191	Alpha-1A adrenergic receptor	ADRA1A	P35348
MOL000911	Terpilene	TAR00210	Muscarinic acetylcholine receptor M2	CHRM2	P08172
MOL000911	Terpilene	TAR00239	Sodium-dependent dopamine transporter	SLC6A3	Q01959
MOL000911	Terpilene	TAR00261	Beta-2 adrenergic receptor	ADRB2	P07550
MOL000911	Terpilene	TAR00308	Glucocorticoid receptor	NR3C1	P04150
MOL000911	Terpilene	TAR00309	Gamma-aminobutyric acid receptor subunit alpha-1	GABRA1	P14867
MOL000911	Terpilene	TAR00332	Dipeptidyl peptidase 4	DPP4	P27487
MOL000911	Terpilene	TAR00482	Cyclin-dependent kinase 2	CDK2	P24941
MOL000911	Terpilene	TAR00499	Endoribonuclease LACTB2	LACTB2	Q53H82
MOL000911	Terpilene	TAR00521	Leukotriene A-4 hydrolase	LTA4H	P09960
MOL000911	Terpilene	TAR00565	Amine oxidase [flavin-containing] B	MAOB	P27338
MOL000911	Terpilene	TAR00566	Amine oxidase [flavin-containing] A	MAOA	P21397
MOL000911	Terpilene	TAR00727	Alcohol dehydrogenase 1C	ADH1C	P00326
MOL000911	Terpilene	TAR01696	Chymotrypsinogen B	CTRB1	P17538
MOL000911	Terpilene	TAR02928	Trypsin-1	PRSS1	P07477
MOL000911	Terpilene	TAR03276	Nuclear receptor coactivator 2	NCOA2	Q15596
MOL000991	cinnamaldehyde	TAR00094	Prostaglandin G/H synthase 2	PTGS2	P35354
MOL000991	cinnamaldehyde	TAR00404	Transient receptor potential cation channel subfamily V member 1	TRPV1	Q8NER1
MOL000991	cinnamaldehyde	TAR00614	Toll-like receptor 4	TLR4	O00206
MOL000991	cinnamaldehyde	TAR00777	Interferon beta	IFNB1	P01574
MOL000991	cinnamaldehyde	TAR00726	Alcohol dehydrogenase 1B	ADH1B	P00325
MOL001237	o-Acetyltoluene	TAR00048	Androgen receptor	AR	P10275
MOL001237	o-Acetyltoluene	TAR00117	Carbonic anhydrase 2	CA2	P00918
MOL001237	o-Acetyltoluene	TAR00308	Glucocorticoid receptor	NR3C1	P04150
MOL001237	o-Acetyltoluene	TAR00727	Alcohol dehydrogenase 1C	ADH1C	P00326
MOL001237	o-Acetyltoluene	TAR01172	Lysozyme C	LYZ	P61626
MOL001237	o-Acetyltoluene	TAR02928	Trypsin-1	PRSS1	P07477
MOL001300	PEL	TAR00117	Carbonic anhydrase 2	CA2	P00918
MOL001300	PEL	TAR00566	Amine oxidase [flavin-containing] A	MAOA	P21397
MOL001300	PEL	TAR00726	Alcohol dehydrogenase 1B	ADH1B	P00325
MOL001300	PEL	TAR00727	Alcohol dehydrogenase 1C	ADH1C	P00326
MOL001300	PEL	TAR00729	Alcohol dehydrogenase 1A	ADH1A	P07327
MOL001300	PEL	TAR02928	Trypsin-1	PRSS1	P07477
MOL001300	PEL	TAR03952	Trypsin-3	PRSS3	P35030
MOL001578	Hypnon	TAR00117	Carbonic anhydrase 2	CA2	P00918
MOL001578	Hypnon	TAR00482	Cyclin-dependent kinase 2	CDK2	P24941
MOL001578	Hypnon	TAR00726	Alcohol dehydrogenase 1B	ADH1B	P00325
MOL001578	Hypnon	TAR00727	Alcohol dehydrogenase 1C	ADH1C	P00326
MOL001578	Hypnon	TAR00729	Alcohol dehydrogenase 1A	ADH1A	P07327
MOL001578	Hypnon	TAR01172	Lysozyme C	LYZ	P61626
MOL001578	Hypnon	TAR02928	Trypsin-1	PRSS1	P07477
MOL001578	Hypnon	TAR03952	Trypsin-3	PRSS3	P35030
MOL000431	coumarin	TAR00088	Arachidonate 5-lipoxygenase	ALOX5	P09917
MOL000431	coumarin	TAR00568	Xanthine dehydrogenase/oxidase [Includes: Xanthine dehydrogenase	XDH	P47989
MOL000431	coumarin	TAR00621	Cytochrome P450 3A4	CYP3A4	P08684
MOL000431	coumarin	TAR00642	Cytochrome P450 2A6	CYP2A6	P11509
MOL000431	coumarin	TAR00733	Glutathione S-transferase P	GSTP1	P09211
MOL000431	coumarin	TAR03236	Aldo-keto reductase family 1 member C1	AKR1C1	Q04828
MOL000431	coumarin	TAR03674	Glutathione S-transferase A2	GSTA2	P09210
MOL000431	coumarin	TAR03781	Glutamate--cysteine ligase catalytic subunit	GCLC	P48506
MOL000431	coumarin	TAR00003	Nitric oxide synthase, inducible	NOS2	P35228
MOL000431	coumarin	TAR00017	Prothrombin	F2	P00734
MOL000431	coumarin	TAR00094	Prostaglandin G/H synthase 2	PTGS2	P35354
MOL000431	coumarin	TAR00095	Nitric oxide synthase, endothelial	NOS3	P29474
MOL000431	coumarin	TAR00117	Carbonic anhydrase 2	CA2	P00918
MOL000431	coumarin	TAR00165	Acetylcholinesterase	ACHE	P22303
MOL000431	coumarin	TAR00499	Endoribonuclease LACTB2	LACTB2	Q53H82
MOL000431	coumarin	TAR00565	Amine oxidase [flavin-containing] B	MAOB	P27338
MOL000431	coumarin	TAR00566	Amine oxidase [flavin-containing] A	MAOA	P21397
MOL000431	coumarin	TAR02928	Trypsin-1	PRSS1	P07477
MOL002003	(-)-Caryophyllene oxide	TAR00016	Muscarinic acetylcholine receptor M3	CHRM3	P20309
MOL002003	(-)-Caryophyllene oxide	TAR00017	Prothrombin	F2	P00734
MOL002003	(-)-Caryophyllene oxide	TAR00038	Muscarinic acetylcholine receptor M1	CHRM1	P11229
MOL002003	(-)-Caryophyllene oxide	TAR00094	Prostaglandin G/H synthase 2	PTGS2	P35354
MOL002003	(-)-Caryophyllene oxide	TAR00165	Acetylcholinesterase	ACHE	P22303
MOL002003	(-)-Caryophyllene oxide	TAR00210	Muscarinic acetylcholine receptor M2	CHRM2	P08172
MOL002003	(-)-Caryophyllene oxide	TAR00216	Alpha-1B adrenergic receptor	ADRA1B	P35368
MOL002003	(-)-Caryophyllene oxide	TAR00309	Gamma-aminobutyric acid receptor subunit alpha-1	GABRA1	P14867
MOL002003	(-)-Caryophyllene oxide	TAR00332	Dipeptidyl peptidase 4	DPP4	P27487
MOL002003	(-)-Caryophyllene oxide	TAR03284	Gamma-aminobutyric acid receptor subunit alpha-6	GABRA6	Q16445
MOL002225	Styrone	TAR02928	Trypsin-1	PRSS1	P07477
MOL002458	ZINC01850974	TAR00141	Gamma-aminobutyric acid receptor subunit alpha-2	GABRA2	P47869
MOL002458	ZINC01850974	TAR00165	Acetylcholinesterase	ACHE	P22303
MOL002458	ZINC01850974	TAR00181	Gamma-aminobutyric acid receptor subunit alpha-5	GABRA5	P31644
MOL002458	ZINC01850974	TAR00200	Gamma-aminobutyric acid receptor subunit alpha-3	GABRA3	P34903
MOL002458	ZINC01850974	TAR00284	Neuronal acetylcholine receptor subunit alpha-2	CHRNA2	Q15822
MOL002458	ZINC01850974	TAR00309	Gamma-aminobutyric acid receptor subunit alpha-1	GABRA1	P14867
MOL002458	ZINC01850974	TAR00332	Dipeptidyl peptidase 4	DPP4	P27487
MOL002697	junipene	TAR00016	Muscarinic acetylcholine receptor M3	CHRM3	P20309
MOL002697	junipene	TAR00017	Prothrombin	F2	P00734
MOL002697	junipene	TAR00046	Estrogen receptor	ESR1	P03372
MOL002697	junipene	TAR00141	Gamma-aminobutyric acid receptor subunit alpha-2	GABRA2	P47869
MOL002697	junipene	TAR00165	Acetylcholinesterase	ACHE	P22303
MOL002697	junipene	TAR00210	Muscarinic acetylcholine receptor M2	CHRM2	P08172
MOL002697	junipene	TAR00216	Alpha-1B adrenergic receptor	ADRA1B	P35368
MOL002697	junipene	TAR00284	Neuronal acetylcholine receptor subunit alpha-2	CHRNA2	Q15822
MOL002697	junipene	TAR00309	Gamma-aminobutyric acid receptor subunit alpha-1	GABRA1	P14867
MOL002697	junipene	TAR00332	Dipeptidyl peptidase 4	DPP4	P27487
MOL002841	l-alpha-Fenchone	TAR00141	Gamma-aminobutyric acid receptor subunit alpha-2	GABRA2	P47869
MOL002841	l-alpha-Fenchone	TAR00165	Acetylcholinesterase	ACHE	P22303
MOL002841	l-alpha-Fenchone	TAR00200	Gamma-aminobutyric acid receptor subunit alpha-3	GABRA3	P34903
MOL002841	l-alpha-Fenchone	TAR00309	Gamma-aminobutyric acid receptor subunit alpha-1	GABRA1	P14867
MOL002841	l-alpha-Fenchone	TAR03284	Gamma-aminobutyric acid receptor subunit alpha-6	GABRA6	Q16445
MOL000489	(1S,4aR,8aR)-1-isopropyl-7-methyl-4-methylene-2,3,4a,5,6,8a-hexahydro-1H-naphthalene	TAR00006	Prostaglandin G/H synthase 1	PTGS1	P23219
MOL000489	(1S,4aR,8aR)-1-isopropyl-7-methyl-4-methylene-2,3,4a,5,6,8a-hexahydro-1H-naphthalene	TAR00016	Muscarinic acetylcholine receptor M3	CHRM3	P20309
MOL000489	(1S,4aR,8aR)-1-isopropyl-7-methyl-4-methylene-2,3,4a,5,6,8a-hexahydro-1H-naphthalene	TAR00017	Prothrombin	F2	P00734
MOL000489	(1S,4aR,8aR)-1-isopropyl-7-methyl-4-methylene-2,3,4a,5,6,8a-hexahydro-1H-naphthalene	TAR00038	Muscarinic acetylcholine receptor M1	CHRM1	P11229
MOL000489	(1S,4aR,8aR)-1-isopropyl-7-methyl-4-methylene-2,3,4a,5,6,8a-hexahydro-1H-naphthalene	TAR00094	Prostaglandin G/H synthase 2	PTGS2	P35354
MOL000489	(1S,4aR,8aR)-1-isopropyl-7-methyl-4-methylene-2,3,4a,5,6,8a-hexahydro-1H-naphthalene	TAR00095	Nitric oxide synthase, endothelial	NOS3	P29474
MOL000489	(1S,4aR,8aR)-1-isopropyl-7-methyl-4-methylene-2,3,4a,5,6,8a-hexahydro-1H-naphthalene	TAR00158	Retinoic acid receptor RXR-alpha	RXRA	P19793
MOL000489	(1S,4aR,8aR)-1-isopropyl-7-methyl-4-methylene-2,3,4a,5,6,8a-hexahydro-1H-naphthalene	TAR00165	Acetylcholinesterase	ACHE	P22303
MOL000489	(1S,4aR,8aR)-1-isopropyl-7-methyl-4-methylene-2,3,4a,5,6,8a-hexahydro-1H-naphthalene	TAR00186	Sodium-dependent noradrenaline transporter	SLC6A2	P23975
MOL000489	(1S,4aR,8aR)-1-isopropyl-7-methyl-4-methylene-2,3,4a,5,6,8a-hexahydro-1H-naphthalene	TAR00216	Alpha-1B adrenergic receptor	ADRA1B	P35368
MOL000489	(1S,4aR,8aR)-1-isopropyl-7-methyl-4-methylene-2,3,4a,5,6,8a-hexahydro-1H-naphthalene	TAR00309	Gamma-aminobutyric acid receptor subunit alpha-1	GABRA1	P14867
MOL000489	(1S,4aR,8aR)-1-isopropyl-7-methyl-4-methylene-2,3,4a,5,6,8a-hexahydro-1H-naphthalene	TAR00332	Dipeptidyl peptidase 4	DPP4	P27487
MOL000489	(1S,4aR,8aR)-1-isopropyl-7-methyl-4-methylene-2,3,4a,5,6,8a-hexahydro-1H-naphthalene	TAR00499	Endoribonuclease LACTB2	LACTB2	Q53H82
MOL000489	(1S,4aR,8aR)-1-isopropyl-7-methyl-4-methylene-2,3,4a,5,6,8a-hexahydro-1H-naphthalene	TAR02928	Trypsin-1	PRSS1	P07477
MOL000489	(1S,4aR,8aR)-1-isopropyl-7-methyl-4-methylene-2,3,4a,5,6,8a-hexahydro-1H-naphthalene	TAR03276	Nuclear receptor coactivator 2	NCOA2	Q15596
MOL003047	[(1S)-endo]-(-)-Borneol	TAR00141	Gamma-aminobutyric acid receptor subunit alpha-2	GABRA2	P47869
MOL003047	[(1S)-endo]-(-)-Borneol	TAR00165	Acetylcholinesterase	ACHE	P22303
MOL003047	[(1S)-endo]-(-)-Borneol	TAR00309	Gamma-aminobutyric acid receptor subunit alpha-1	GABRA1	P14867
MOL003047	[(1S)-endo]-(-)-Borneol	TAR02928	Trypsin-1	PRSS1	P07477
MOL003521	Isohomogenol	TAR00006	Prostaglandin G/H synthase 1	PTGS1	P23219
MOL003521	Isohomogenol	TAR00007	D	DRD1	P21728
MOL003521	Isohomogenol	TAR00016	Muscarinic acetylcholine receptor M3	CHRM3	P20309
MOL003521	Isohomogenol	TAR00017	Prothrombin	F2	P00734
MOL003521	Isohomogenol	TAR00038	Muscarinic acetylcholine receptor M1	CHRM1	P11229
MOL003521	Isohomogenol	TAR00063	Beta-1 adrenergic receptor	ADRB1	P08588
MOL003521	Isohomogenol	TAR00094	Prostaglandin G/H synthase 2	PTGS2	P35354
MOL003521	Isohomogenol	TAR00095	Nitric oxide synthase, endothelial	NOS3	P29474
MOL003521	Isohomogenol	TAR00105	Alpha-2A adrenergic receptor	ADRA2A	P08913
MOL003521	Isohomogenol	TAR00117	Carbonic anhydrase 2	CA2	P00918
MOL003521	Isohomogenol	TAR00126	Alpha-2C adrenergic receptor	ADRA2C	P18825
MOL003521	Isohomogenol	TAR00165	Acetylcholinesterase	ACHE	P22303
MOL003521	Isohomogenol	TAR00175	5-hydroxytryptamine receptor 2A	HTR2A	P28223
MOL003521	Isohomogenol	TAR00186	Sodium-dependent noradrenaline transporter	SLC6A2	P23975
MOL003521	Isohomogenol	TAR00191	Alpha-1A adrenergic receptor	ADRA1A	P35348
MOL003521	Isohomogenol	TAR00210	Muscarinic acetylcholine receptor M2	CHRM2	P08172
MOL003521	Isohomogenol	TAR00214	Alpha-2B adrenergic receptor	ADRA2B	P18089
MOL003521	Isohomogenol	TAR00216	Alpha-1B adrenergic receptor	ADRA1B	P35368
MOL003521	Isohomogenol	TAR00239	Sodium-dependent dopamine transporter	SLC6A3	Q01959
MOL003521	Isohomogenol	TAR00261	Beta-2 adrenergic receptor	ADRB2	P07550
MOL003521	Isohomogenol	TAR00272	Alpha-1D adrenergic receptor	ADRA1D	P25100
MOL003521	Isohomogenol	TAR00290	Sodium-dependent serotonin transporter	SLC6A4	P31645
MOL003521	Isohomogenol	TAR00332	Dipeptidyl peptidase 4	DPP4	P27487
MOL003521	Isohomogenol	TAR00499	Endoribonuclease LACTB2	LACTB2	Q53H82
MOL003521	Isohomogenol	TAR00521	Leukotriene A-4 hydrolase	LTA4H	P09960
MOL003521	Isohomogenol	TAR00565	Amine oxidase [flavin-containing] B	MAOB	P27338
MOL003521	Isohomogenol	TAR02928	Trypsin-1	PRSS1	P07477
MOL003521	Isohomogenol	TAR03586	cAMP-dependent protein kinase inhibitor alpha	PKIA	P61925
MOL003522	()-Sativene	TAR00016	Muscarinic acetylcholine receptor M3	CHRM3	P20309
MOL003522	()-Sativene	TAR00017	Prothrombin	F2	P00734
MOL003522	()-Sativene	TAR00038	Muscarinic acetylcholine receptor M1	CHRM1	P11229
MOL003522	()-Sativene	TAR00094	Prostaglandin G/H synthase 2	PTGS2	P35354
MOL003522	()-Sativene	TAR00141	Gamma-aminobutyric acid receptor subunit alpha-2	GABRA2	P47869
MOL003522	()-Sativene	TAR00165	Acetylcholinesterase	ACHE	P22303
MOL003522	()-Sativene	TAR00200	Gamma-aminobutyric acid receptor subunit alpha-3	GABRA3	P34903
MOL003522	()-Sativene	TAR00210	Muscarinic acetylcholine receptor M2	CHRM2	P08172
MOL003522	()-Sativene	TAR00216	Alpha-1B adrenergic receptor	ADRA1B	P35368
MOL003522	()-Sativene	TAR00284	Neuronal acetylcholine receptor subunit alpha-2	CHRNA2	Q15822
MOL003522	()-Sativene	TAR00309	Gamma-aminobutyric acid receptor subunit alpha-1	GABRA1	P14867
MOL003522	()-Sativene	TAR00332	Dipeptidyl peptidase 4	DPP4	P27487
MOL003522	()-Sativene	TAR00499	Endoribonuclease LACTB2	LACTB2	Q53H82
MOL003522	()-Sativene	TAR00581	Neuronal acetylcholine receptor subunit alpha-7	CHRNA7	P36544
MOL003522	()-Sativene	TAR03276	Nuclear receptor coactivator 2	NCOA2	Q15596
MOL003524	Benzenepropanol	TAR02928	Trypsin-1	PRSS1	P07477
MOL003525	Pyruvophenone	TAR00017	Prothrombin	F2	P00734
MOL003525	Pyruvophenone	TAR00063	Beta-1 adrenergic receptor	ADRB1	P08588
MOL003525	Pyruvophenone	TAR00095	Nitric oxide synthase, endothelial	NOS3	P29474
MOL003525	Pyruvophenone	TAR00117	Carbonic anhydrase 2	CA2	P00918
MOL003525	Pyruvophenone	TAR00126	Alpha-2C adrenergic receptor	ADRA2C	P18825
MOL003525	Pyruvophenone	TAR00165	Acetylcholinesterase	ACHE	P22303
MOL003525	Pyruvophenone	TAR00186	Sodium-dependent noradrenaline transporter	SLC6A2	P23975
MOL003525	Pyruvophenone	TAR00216	Alpha-1B adrenergic receptor	ADRA1B	P35368
MOL003525	Pyruvophenone	TAR00239	Sodium-dependent dopamine transporter	SLC6A3	Q01959
MOL003525	Pyruvophenone	TAR00499	Endoribonuclease LACTB2	LACTB2	Q53H82
MOL003525	Pyruvophenone	TAR00565	Amine oxidase [flavin-containing] B	MAOB	P27338
MOL003525	Pyruvophenone	TAR00566	Amine oxidase [flavin-containing] A	MAOA	P21397
MOL003525	Pyruvophenone	TAR01172	Lysozyme C	LYZ	P61626
MOL003525	Pyruvophenone	TAR02928	Trypsin-1	PRSS1	P07477
MOL003528	METHYLBENZOFURAN	TAR01172	Lysozyme C	LYZ	P61626
MOL003529	m-Methylacetophenone	TAR00117	Carbonic anhydrase 2	CA2	P00918
MOL003529	m-Methylacetophenone	TAR00727	Alcohol dehydrogenase 1C	ADH1C	P00326
MOL003529	m-Methylacetophenone	TAR01172	Lysozyme C	LYZ	P61626
MOL003529	m-Methylacetophenone	TAR02928	Trypsin-1	PRSS1	P07477
MOL003531	3-methoxycinnamaldehyde	TAR00006	Prostaglandin G/H synthase 1	PTGS1	P23219
MOL003531	3-methoxycinnamaldehyde	TAR00094	Prostaglandin G/H synthase 2	PTGS2	P35354
MOL003531	3-methoxycinnamaldehyde	TAR00117	Carbonic anhydrase 2	CA2	P00918
MOL003531	3-methoxycinnamaldehyde	TAR00332	Dipeptidyl peptidase 4	DPP4	P27487
MOL003531	3-methoxycinnamaldehyde	TAR00499	Endoribonuclease LACTB2	LACTB2	Q53H82
MOL003531	3-methoxycinnamaldehyde	TAR00565	Amine oxidase [flavin-containing] B	MAOB	P27338
MOL003531	3-methoxycinnamaldehyde	TAR01172	Lysozyme C	LYZ	P61626
MOL003531	3-methoxycinnamaldehyde	TAR02928	Trypsin-1	PRSS1	P07477
MOL000615	delta-amorphene	TAR00006	Prostaglandin G/H synthase 1	PTGS1	P23219
MOL000615	delta-amorphene	TAR00017	Prothrombin	F2	P00734
MOL000615	delta-amorphene	TAR00038	Muscarinic acetylcholine receptor M1	CHRM1	P11229
MOL000615	delta-amorphene	TAR00046	Estrogen receptor	ESR1	P03372
MOL000615	delta-amorphene	TAR00094	Prostaglandin G/H synthase 2	PTGS2	P35354
MOL000615	delta-amorphene	TAR00095	Nitric oxide synthase, endothelial	NOS3	P29474
MOL000615	delta-amorphene	TAR00117	Carbonic anhydrase 2	CA2	P00918
MOL000615	delta-amorphene	TAR00158	Retinoic acid receptor RXR-alpha	RXRA	P19793
MOL000615	delta-amorphene	TAR00165	Acetylcholinesterase	ACHE	P22303
MOL000615	delta-amorphene	TAR00186	Sodium-dependent noradrenaline transporter	SLC6A2	P23975
MOL000615	delta-amorphene	TAR00309	Gamma-aminobutyric acid receptor subunit alpha-1	GABRA1	P14867
MOL000615	delta-amorphene	TAR00332	Dipeptidyl peptidase 4	DPP4	P27487
MOL000615	delta-amorphene	TAR00499	Endoribonuclease LACTB2	LACTB2	Q53H82
MOL000615	delta-amorphene	TAR00565	Amine oxidase [flavin-containing] B	MAOB	P27338
MOL000615	delta-amorphene	TAR02928	Trypsin-1	PRSS1	P07477
MOL000615	delta-amorphene	TAR03276	Nuclear receptor coactivator 2	NCOA2	Q15596
MOL003537	T-Muurolol	TAR00016	Muscarinic acetylcholine receptor M3	CHRM3	P20309
MOL003537	T-Muurolol	TAR00017	Prothrombin	F2	P00734
MOL003537	T-Muurolol	TAR00038	Muscarinic acetylcholine receptor M1	CHRM1	P11229
MOL003537	T-Muurolol	TAR00141	Gamma-aminobutyric acid receptor subunit alpha-2	GABRA2	P47869
MOL003537	T-Muurolol	TAR00165	Acetylcholinesterase	ACHE	P22303
MOL003537	T-Muurolol	TAR00186	Sodium-dependent noradrenaline transporter	SLC6A2	P23975
MOL003537	T-Muurolol	TAR00216	Alpha-1B adrenergic receptor	ADRA1B	P35368
MOL003537	T-Muurolol	TAR00309	Gamma-aminobutyric acid receptor subunit alpha-1	GABRA1	P14867
MOL003537	T-Muurolol	TAR00332	Dipeptidyl peptidase 4	DPP4	P27487
MOL003537	T-Muurolol	TAR00581	Neuronal acetylcholine receptor subunit alpha-7	CHRNA7	P36544
MOL003537	T-Muurolol	TAR02928	Trypsin-1	PRSS1	P07477
MOL003537	T-Muurolol	TAR03284	Gamma-aminobutyric acid receptor subunit alpha-6	GABRA6	Q16445
MOL003538	()-Ledene	TAR00016	Muscarinic acetylcholine receptor M3	CHRM3	P20309
MOL003538	()-Ledene	TAR00038	Muscarinic acetylcholine receptor M1	CHRM1	P11229
MOL003538	()-Ledene	TAR00046	Estrogen receptor	ESR1	P03372
MOL003538	()-Ledene	TAR00165	Acetylcholinesterase	ACHE	P22303
MOL003538	()-Ledene	TAR03276	Nuclear receptor coactivator 2	NCOA2	Q15596
MOL000677	(1R,4R)-4-isopropyl-1,6-dimethyltetralin	TAR00006	Prostaglandin G/H synthase 1	PTGS1	P23219
MOL000677	(1R,4R)-4-isopropyl-1,6-dimethyltetralin	TAR00016	Muscarinic acetylcholine receptor M3	CHRM3	P20309
MOL000677	(1R,4R)-4-isopropyl-1,6-dimethyltetralin	TAR00017	Prothrombin	F2	P00734
MOL000677	(1R,4R)-4-isopropyl-1,6-dimethyltetralin	TAR00038	Muscarinic acetylcholine receptor M1	CHRM1	P11229
MOL000677	(1R,4R)-4-isopropyl-1,6-dimethyltetralin	TAR00046	Estrogen receptor	ESR1	P03372
MOL000677	(1R,4R)-4-isopropyl-1,6-dimethyltetralin	TAR00070	Sodium channel protein type 5 subunit alpha	SCN5A	Q14524
MOL000677	(1R,4R)-4-isopropyl-1,6-dimethyltetralin	TAR00094	Prostaglandin G/H synthase 2	PTGS2	P35354
MOL000677	(1R,4R)-4-isopropyl-1,6-dimethyltetralin	TAR00095	Nitric oxide synthase, endothelial	NOS3	P29474
MOL000677	(1R,4R)-4-isopropyl-1,6-dimethyltetralin	TAR00158	Retinoic acid receptor RXR-alpha	RXRA	P19793
MOL000677	(1R,4R)-4-isopropyl-1,6-dimethyltetralin	TAR00186	Sodium-dependent noradrenaline transporter	SLC6A2	P23975
MOL000677	(1R,4R)-4-isopropyl-1,6-dimethyltetralin	TAR00191	Alpha-1A adrenergic receptor	ADRA1A	P35348
MOL000677	(1R,4R)-4-isopropyl-1,6-dimethyltetralin	TAR00216	Alpha-1B adrenergic receptor	ADRA1B	P35368
MOL000677	(1R,4R)-4-isopropyl-1,6-dimethyltetralin	TAR00239	Sodium-dependent dopamine transporter	SLC6A3	Q01959
MOL000677	(1R,4R)-4-isopropyl-1,6-dimethyltetralin	TAR00272	Alpha-1D adrenergic receptor	ADRA1D	P25100
MOL000677	(1R,4R)-4-isopropyl-1,6-dimethyltetralin	TAR00290	Sodium-dependent serotonin transporter	SLC6A4	P31645
MOL000677	(1R,4R)-4-isopropyl-1,6-dimethyltetralin	TAR00309	Gamma-aminobutyric acid receptor subunit alpha-1	GABRA1	P14867
MOL000677	(1R,4R)-4-isopropyl-1,6-dimethyltetralin	TAR00332	Dipeptidyl peptidase 4	DPP4	P27487
MOL000698	(R)-(-)-alpha-Phellandrene	TAR00165	Acetylcholinesterase	ACHE	P22303
MOL000698	(R)-(-)-alpha-Phellandrene	TAR00186	Sodium-dependent noradrenaline transporter	SLC6A2	P23975
MOL000698	(R)-(-)-alpha-Phellandrene	TAR00284	Neuronal acetylcholine receptor subunit alpha-2	CHRNA2	Q15822
MOL000698	(R)-(-)-alpha-Phellandrene	TAR00309	Gamma-aminobutyric acid receptor subunit alpha-1	GABRA1	P14867
MOL000698	(R)-(-)-alpha-Phellandrene	TAR00332	Dipeptidyl peptidase 4	DPP4	P27487
MOL000698	(R)-(-)-alpha-Phellandrene	TAR02928	Trypsin-1	PRSS1	P07477
MOL001123	muurolene	TAR00003	Nitric oxide synthase, inducible	NOS2	P35228
MOL001123	muurolene	TAR00006	Prostaglandin G/H synthase 1	PTGS1	P23219
MOL001123	muurolene	TAR00017	Prothrombin	F2	P00734
MOL001123	muurolene	TAR00038	Muscarinic acetylcholine receptor M1	CHRM1	P11229
MOL001123	muurolene	TAR00046	Estrogen receptor	ESR1	P03372
MOL001123	muurolene	TAR00094	Prostaglandin G/H synthase 2	PTGS2	P35354
MOL001123	muurolene	TAR00095	Nitric oxide synthase, endothelial	NOS3	P29474
MOL001123	muurolene	TAR00117	Carbonic anhydrase 2	CA2	P00918
MOL001123	muurolene	TAR00141	Gamma-aminobutyric acid receptor subunit alpha-2	GABRA2	P47869
MOL001123	muurolene	TAR00158	Retinoic acid receptor RXR-alpha	RXRA	P19793
MOL001123	muurolene	TAR00165	Acetylcholinesterase	ACHE	P22303
MOL001123	muurolene	TAR00186	Sodium-dependent noradrenaline transporter	SLC6A2	P23975
MOL001123	muurolene	TAR00216	Alpha-1B adrenergic receptor	ADRA1B	P35368
MOL001123	muurolene	TAR00309	Gamma-aminobutyric acid receptor subunit alpha-1	GABRA1	P14867
MOL001123	muurolene	TAR00332	Dipeptidyl peptidase 4	DPP4	P27487
MOL001123	muurolene	TAR00565	Amine oxidase [flavin-containing] B	MAOB	P27338
MOL001123	muurolene	TAR02928	Trypsin-1	PRSS1	P07477
MOL001123	muurolene	TAR03276	Nuclear receptor coactivator 2	NCOA2	Q15596
MOL001201	(1R,5R,7S)-4,7-dimethyl-7-(4-methylpent-3-enyl)bicyclo[3.1.1]hept-3-ene	TAR00016	Muscarinic acetylcholine receptor M3	CHRM3	P20309
MOL001201	(1R,5R,7S)-4,7-dimethyl-7-(4-methylpent-3-enyl)bicyclo[3.1.1]hept-3-ene	TAR00017	Prothrombin	F2	P00734
MOL001201	(1R,5R,7S)-4,7-dimethyl-7-(4-methylpent-3-enyl)bicyclo[3.1.1]hept-3-ene	TAR00038	Muscarinic acetylcholine receptor M1	CHRM1	P11229
MOL001201	(1R,5R,7S)-4,7-dimethyl-7-(4-methylpent-3-enyl)bicyclo[3.1.1]hept-3-ene	TAR00046	Estrogen receptor	ESR1	P03372
MOL001201	(1R,5R,7S)-4,7-dimethyl-7-(4-methylpent-3-enyl)bicyclo[3.1.1]hept-3-ene	TAR00048	Androgen receptor	AR	P10275
MOL001201	(1R,5R,7S)-4,7-dimethyl-7-(4-methylpent-3-enyl)bicyclo[3.1.1]hept-3-ene	TAR00094	Prostaglandin G/H synthase 2	PTGS2	P35354
MOL001201	(1R,5R,7S)-4,7-dimethyl-7-(4-methylpent-3-enyl)bicyclo[3.1.1]hept-3-ene	TAR00095	Nitric oxide synthase, endothelial	NOS3	P29474
MOL001201	(1R,5R,7S)-4,7-dimethyl-7-(4-methylpent-3-enyl)bicyclo[3.1.1]hept-3-ene	TAR00117	Carbonic anhydrase 2	CA2	P00918
MOL001201	(1R,5R,7S)-4,7-dimethyl-7-(4-methylpent-3-enyl)bicyclo[3.1.1]hept-3-ene	TAR00158	Retinoic acid receptor RXR-alpha	RXRA	P19793
MOL001201	(1R,5R,7S)-4,7-dimethyl-7-(4-methylpent-3-enyl)bicyclo[3.1.1]hept-3-ene	TAR00165	Acetylcholinesterase	ACHE	P22303
MOL001201	(1R,5R,7S)-4,7-dimethyl-7-(4-methylpent-3-enyl)bicyclo[3.1.1]hept-3-ene	TAR00186	Sodium-dependent noradrenaline transporter	SLC6A2	P23975
MOL001201	(1R,5R,7S)-4,7-dimethyl-7-(4-methylpent-3-enyl)bicyclo[3.1.1]hept-3-ene	TAR00210	Muscarinic acetylcholine receptor M2	CHRM2	P08172
MOL001201	(1R,5R,7S)-4,7-dimethyl-7-(4-methylpent-3-enyl)bicyclo[3.1.1]hept-3-ene	TAR00239	Sodium-dependent dopamine transporter	SLC6A3	Q01959
MOL001201	(1R,5R,7S)-4,7-dimethyl-7-(4-methylpent-3-enyl)bicyclo[3.1.1]hept-3-ene	TAR00309	Gamma-aminobutyric acid receptor subunit alpha-1	GABRA1	P14867
MOL001201	(1R,5R,7S)-4,7-dimethyl-7-(4-methylpent-3-enyl)bicyclo[3.1.1]hept-3-ene	TAR00332	Dipeptidyl peptidase 4	DPP4	P27487
MOL001201	(1R,5R,7S)-4,7-dimethyl-7-(4-methylpent-3-enyl)bicyclo[3.1.1]hept-3-ene	TAR03276	Nuclear receptor coactivator 2	NCOA2	Q15596
MOL001201	(1R,5R,7S)-4,7-dimethyl-7-(4-methylpent-3-enyl)bicyclo[3.1.1]hept-3-ene	TAR03284	Gamma-aminobutyric acid receptor subunit alpha-6	GABRA6	Q16445
MOL001862	Cadalin	TAR00006	Prostaglandin G/H synthase 1	PTGS1	P23219
MOL001862	Cadalin	TAR00017	Prothrombin	F2	P00734
MOL001862	Cadalin	TAR00038	Muscarinic acetylcholine receptor M1	CHRM1	P11229
MOL001862	Cadalin	TAR00046	Estrogen receptor	ESR1	P03372
MOL001862	Cadalin	TAR00094	Prostaglandin G/H synthase 2	PTGS2	P35354
MOL001862	Cadalin	TAR00172	cGMP-inhibited 3',5'-cyclic phosphodiesterase A	PDE3A	Q14432
MOL001862	Cadalin	TAR00186	Sodium-dependent noradrenaline transporter	SLC6A2	P23975
MOL001862	Cadalin	TAR00191	Alpha-1A adrenergic receptor	ADRA1A	P35348
MOL001862	Cadalin	TAR00239	Sodium-dependent dopamine transporter	SLC6A3	Q01959
MOL002295	cinnamic acid	TAR00318	Maltase-glucoamylase, intestinal [Includes: Maltase	MGAM	O43451
MOL002295	cinnamic acid	TAR00466	Tissue factor	F3	P13726
MOL002295	cinnamic acid	TAR00006	Prostaglandin G/H synthase 1	PTGS1	P23219
MOL002295	cinnamic acid	TAR00017	Prothrombin	F2	P00734
MOL002295	cinnamic acid	TAR00094	Prostaglandin G/H synthase 2	PTGS2	P35354
MOL002295	cinnamic acid	TAR00095	Nitric oxide synthase, endothelial	NOS3	P29474
MOL002295	cinnamic acid	TAR00117	Carbonic anhydrase 2	CA2	P00918
MOL002295	cinnamic acid	TAR00165	Acetylcholinesterase	ACHE	P22303
MOL002295	cinnamic acid	TAR00482	Cyclin-dependent kinase 2	CDK2	P24941
MOL002295	cinnamic acid	TAR00499	Endoribonuclease LACTB2	LACTB2	Q53H82
MOL002295	cinnamic acid	TAR00565	Amine oxidase [flavin-containing] B	MAOB	P27338
MOL002295	cinnamic acid	TAR00566	Amine oxidase [flavin-containing] A	MAOA	P21397
MOL002295	cinnamic acid	TAR01172	Lysozyme C	LYZ	P61626
MOL002295	cinnamic acid	TAR02928	Trypsin-1	PRSS1	P07477
MOL002526	3691-11-0	TAR00003	Nitric oxide synthase, inducible	NOS2	P35228
MOL002526	3691-11-0	TAR00006	Prostaglandin G/H synthase 1	PTGS1	P23219
MOL002526	3691-11-0	TAR00016	Muscarinic acetylcholine receptor M3	CHRM3	P20309
MOL002526	3691-11-0	TAR00017	Prothrombin	F2	P00734
MOL002526	3691-11-0	TAR00038	Muscarinic acetylcholine receptor M1	CHRM1	P11229
MOL002526	3691-11-0	TAR00046	Estrogen receptor	ESR1	P03372
MOL002526	3691-11-0	TAR00094	Prostaglandin G/H synthase 2	PTGS2	P35354
MOL002526	3691-11-0	TAR00095	Nitric oxide synthase, endothelial	NOS3	P29474
MOL002526	3691-11-0	TAR00141	Gamma-aminobutyric acid receptor subunit alpha-2	GABRA2	P47869
MOL002526	3691-11-0	TAR00158	Retinoic acid receptor RXR-alpha	RXRA	P19793
MOL002526	3691-11-0	TAR00165	Acetylcholinesterase	ACHE	P22303
MOL002526	3691-11-0	TAR00186	Sodium-dependent noradrenaline transporter	SLC6A2	P23975
MOL002526	3691-11-0	TAR00191	Alpha-1A adrenergic receptor	ADRA1A	P35348
MOL002526	3691-11-0	TAR00200	Gamma-aminobutyric acid receptor subunit alpha-3	GABRA3	P34903
MOL002526	3691-11-0	TAR00210	Muscarinic acetylcholine receptor M2	CHRM2	P08172
MOL002526	3691-11-0	TAR00216	Alpha-1B adrenergic receptor	ADRA1B	P35368
MOL002526	3691-11-0	TAR00309	Gamma-aminobutyric acid receptor subunit alpha-1	GABRA1	P14867
MOL002526	3691-11-0	TAR00332	Dipeptidyl peptidase 4	DPP4	P27487
MOL002526	3691-11-0	TAR00499	Endoribonuclease LACTB2	LACTB2	Q53H82
MOL002526	3691-11-0	TAR00565	Amine oxidase [flavin-containing] B	MAOB	P27338
MOL002526	3691-11-0	TAR02928	Trypsin-1	PRSS1	P07477
MOL002526	3691-11-0	TAR03276	Nuclear receptor coactivator 2	NCOA2	Q15596
MOL002526	3691-11-0	TAR03284	Gamma-aminobutyric acid receptor subunit alpha-6	GABRA6	Q16445
MOL002972	(4S)-1-methyl-4-(6-methylhepta-1,5-dien-2-yl)cyclohexene	TAR00017	Prothrombin	F2	P00734
MOL002972	(4S)-1-methyl-4-(6-methylhepta-1,5-dien-2-yl)cyclohexene	TAR00094	Prostaglandin G/H synthase 2	PTGS2	P35354
MOL002972	(4S)-1-methyl-4-(6-methylhepta-1,5-dien-2-yl)cyclohexene	TAR00095	Nitric oxide synthase, endothelial	NOS3	P29474
MOL002972	(4S)-1-methyl-4-(6-methylhepta-1,5-dien-2-yl)cyclohexene	TAR00117	Carbonic anhydrase 2	CA2	P00918
MOL002972	(4S)-1-methyl-4-(6-methylhepta-1,5-dien-2-yl)cyclohexene	TAR00165	Acetylcholinesterase	ACHE	P22303
MOL002972	(4S)-1-methyl-4-(6-methylhepta-1,5-dien-2-yl)cyclohexene	TAR00186	Sodium-dependent noradrenaline transporter	SLC6A2	P23975
MOL002972	(4S)-1-methyl-4-(6-methylhepta-1,5-dien-2-yl)cyclohexene	TAR00210	Muscarinic acetylcholine receptor M2	CHRM2	P08172
MOL002972	(4S)-1-methyl-4-(6-methylhepta-1,5-dien-2-yl)cyclohexene	TAR00332	Dipeptidyl peptidase 4	DPP4	P27487
MOL002972	(4S)-1-methyl-4-(6-methylhepta-1,5-dien-2-yl)cyclohexene	TAR00565	Amine oxidase [flavin-containing] B	MAOB	P27338
MOL002972	(4S)-1-methyl-4-(6-methylhepta-1,5-dien-2-yl)cyclohexene	TAR02928	Trypsin-1	PRSS1	P07477
MOL002972	(4S)-1-methyl-4-(6-methylhepta-1,5-dien-2-yl)cyclohexene	TAR03276	Nuclear receptor coactivator 2	NCOA2	Q15596
MOL003032	BZM	TAR00038	Muscarinic acetylcholine receptor M1	CHRM1	P11229
MOL003032	BZM	TAR00063	Beta-1 adrenergic receptor	ADRB1	P08588
MOL003032	BZM	TAR00239	Sodium-dependent dopamine transporter	SLC6A3	Q01959
MOL003032	BZM	TAR00261	Beta-2 adrenergic receptor	ADRB2	P07550
MOL003032	BZM	TAR00290	Sodium-dependent serotonin transporter	SLC6A4	P31645
MOL003032	BZM	TAR00332	Dipeptidyl peptidase 4	DPP4	P27487
MOL003032	BZM	TAR03586	cAMP-dependent protein kinase inhibitor alpha	PKIA	P61925
MOL003534	CADINENE	TAR00017	Prothrombin	F2	P00734
MOL003534	CADINENE	TAR00038	Muscarinic acetylcholine receptor M1	CHRM1	P11229
MOL003534	CADINENE	TAR00046	Estrogen receptor	ESR1	P03372
MOL003534	CADINENE	TAR00094	Prostaglandin G/H synthase 2	PTGS2	P35354
MOL003534	CADINENE	TAR00095	Nitric oxide synthase, endothelial	NOS3	P29474
MOL003534	CADINENE	TAR00158	Retinoic acid receptor RXR-alpha	RXRA	P19793
MOL003534	CADINENE	TAR00165	Acetylcholinesterase	ACHE	P22303
MOL003534	CADINENE	TAR00186	Sodium-dependent noradrenaline transporter	SLC6A2	P23975
MOL003534	CADINENE	TAR00309	Gamma-aminobutyric acid receptor subunit alpha-1	GABRA1	P14867
MOL003534	CADINENE	TAR00332	Dipeptidyl peptidase 4	DPP4	P27487
MOL003534	CADINENE	TAR02928	Trypsin-1	PRSS1	P07477
MOL003534	CADINENE	TAR03276	Nuclear receptor coactivator 2	NCOA2	Q15596
MOL003536	T-Cadinol	TAR00016	Muscarinic acetylcholine receptor M3	CHRM3	P20309
MOL003536	T-Cadinol	TAR00017	Prothrombin	F2	P00734
MOL003536	T-Cadinol	TAR00038	Muscarinic acetylcholine receptor M1	CHRM1	P11229
MOL003536	T-Cadinol	TAR00165	Acetylcholinesterase	ACHE	P22303
MOL003536	T-Cadinol	TAR00216	Alpha-1B adrenergic receptor	ADRA1B	P35368
MOL003536	T-Cadinol	TAR00309	Gamma-aminobutyric acid receptor subunit alpha-1	GABRA1	P14867
MOL003536	T-Cadinol	TAR00332	Dipeptidyl peptidase 4	DPP4	P27487
MOL003536	T-Cadinol	TAR03284	Gamma-aminobutyric acid receptor subunit alpha-6	GABRA6	Q16445
