# Supplementary material for: The Potential Mechanism of Wuwei Qingzhuo San against Hyperlipidemia Based on TCM Network Pharmacology and Validation Experiments in Hyperlipidemia Hamster
Source: Evid Based Complement Alternat Med. 2020 May 10;2020:5369025. doi: 10.1155/2020/5369025 (PMC7212318; doi:10.1155/2020/5369025)
Supplement: Supplementary Materials — include the following. Supplementary Table 1: information of compounds from five herbal medicines in WWQZS collected from public data resources and Information of candidate compounds of five herbal medicines in WWQZS after screening. Supplementary Table 2: the details of targets from compounds in Shiliu, Honghua, Bibo, Doukou, and Rougui. Supplementary Table 3: known hyperlipidemia-related targets. WWQZS shared 43 potential targets with known anti-hyperlipidemia targets. Supplementary Table 4: the degrees and betweennesses of nodes in 45 candidate targets network. Supplementary Table 5: the BP, MF, and CC enrichment analyses for targets of WWQZS against hyperlipidemia. Supplementary Table 6: the KEGG pathways enrichment analysis for targets of WWQZS against hyperlipidemia. [file 5369025.f1.zip › 5369025.f1/supplement table 3.xlsx]

## Sheet: Sheet1
Known hyperlipidemia-related targets
Gene Symbol	Target Protein Name	Uniprot ID	Source
NR1I2	Nuclear receptor subfamily 1 group I member 2	O75469	Drugbank
ITGB2	Integrin beta-2	P05107	Drugbank
ANPEP	Aminopeptidase N	P15144	Drugbank
RXRA	Retinoic acid receptor RXR-alpha	P19793	Drugbank
ITGAL	Integrin alpha-L	P20701	Drugbank
DPP4	Dipeptidyl peptidase 4	P27487	Drugbank
RXRB	Retinoic acid receptor RXR-beta	P28702	Drugbank
NNMT	Nicotinamide N-methyltransferase	P40261	Drugbank
RXRG	Retinoic acid receptor RXR-gamma	P48443	Drugbank
HCAR3	Hydroxycarboxylic acid receptor 3	P49019	Drugbank
QPRT	Nicotinate-nucleotide pyrophosphorylase [carboxylating]	Q15274	Drugbank
INSIG1	Insulin-induced gene 1 protein	O15503	OMIM
CLOCK	Circadian locomoter output cycles protein kaput	O15516	OMIM
TLR5	Toll-like receptor 5	O60602	OMIM
LYPLA1	Acyl-protein thioesterase 1	O75608	OMIM
GP1BA	Platelet glycoprotein Ib alpha chain	P07359	OMIM
CCL3	C-C motif chemokine 3	P10147	OMIM
CXCL2	C-X-C motif chemokine 2	P19875	OMIM
TNFRSF1B	Tumor necrosis factor receptor superfamily member 1B	P20333	OMIM
HSD11B1	Corticosteroid 11-beta-dehydrogenase isozyme 1	P28845	OMIM
ADD1	Alpha-adducin	P35611	OMIM
CCR2	C-C chemokine receptor type 2	P41597	OMIM
NMU	Neuromedin-U [Cleaved into: Neuromedin-U-25	P48645	OMIM
JAK3	Tyrosine-protein kinase JAK3	P52333	OMIM
SEC61A1	Protein transport protein Sec61 subunit alpha isoform 1	P61619	OMIM
CYP24A1	1,25-dihydroxyvitamin D	Q07973	OMIM
RALBP1	RalA-binding protein 1	Q15311	OMIM
PPARGC1B	Peroxisome proliferator-activated receptor gamma coactivator 1-beta	Q86YN6	OMIM
KDM3A	Lysine-specific demethylase 3A	Q9Y4C1	OMIM
INSIG2	Insulin-induced gene 2 protein	Q9Y5U4	OMIM
HMOX1	Heme oxygenase 1	P09601	TTD
THRA	Thyroid hormone receptor alpha	P10827	TTD
THRB	Thyroid hormone receptor beta	P10828	TTD
ACAT1	Acetyl-CoA acetyltransferase, mitochondrial	P24752	TTD
ADORA2A	Adenosine receptor A2a	P29274	TTD
ADORA1	Adenosine receptor A1	P30542	TTD
DPYD	Dihydropyrimidine dehydrogenase [NADP	Q12882	TTD
ESR2	Estrogen receptor beta	Q92731	TTD
TLR4	Toll-like receptor 4	O00206	Genecards
MEN1	Menin	O00255	Genecards
PIK3C2A	Phosphatidylinositol 4-phosphate 3-kinase C2 domain-containing subunit alpha	O00443	Genecards
NFIB	Nuclear factor 1 B-type	O00712	Genecards
SCD	Acyl-CoA desaturase	O00767	Genecards
UNC13B	Protein unc-13 homolog B	O14795	Genecards
SHOX	Short stature homeobox protein	O15266	Genecards
KCNN4	Intermediate conductance calcium-activated potassium channel protein 4	O15554	Genecards
MGAM	Maltase-glucoamylase, intestinal [Includes: Maltase	O43451	Genecards
ACTN4	Alpha-actinin-4	O43707	Genecards
SLC37A4	Glucose-6-phosphate exchanger SLC37A4	O43826	Genecards
NPHS1	Nephrin	O60500	Genecards
TLR2	Toll-like receptor 2	O60603	Genecards
LPXN	Leupaxin	O60711	Genecards
SHOX2	Short stature homeobox protein 2	O60902	Genecards
ZMPSTE24	CAAX prenyl protease 1 homolog	O75844	Genecards
DGAT1	Diacylglycerol O-acyltransferase 1	O75907	Genecards
SOAT2	Sterol O-acyltransferase 2	O75908	Genecards
USP19	Ubiquitin carboxyl-terminal hydrolase 19	O94966	Genecards
ALX3	Homeobox protein aristaless-like 3	O95076	Genecards
ELP1	Elongator complex protein 1	O95163	Genecards
SGPL1	Sphingosine-1-phosphate lyase 1	O95470	Genecards
PPP1R17	Protein phosphatase 1 regulatory subunit 17	O96001	Genecards
SOD1	Superoxide dismutase [Cu-Zn]	P00441	Genecards
CP	Ceruloplasmin	P00450	Genecards
F2	Prothrombin	P00734	Genecards
HP	Haptoglobin	P00738	Genecards
PLAT	Tissue-type plasminogen activator	P00750	Genecards
SERPINC1	Antithrombin-III	P01008	Genecards
SERPINA3	Alpha-1-antichymotrypsin	P01011	Genecards
AGT	Angiotensinogen	P01019	Genecards
C3	Complement C3	P01024	Genecards
CST3	Cystatin-C	P01034	Genecards
FOS	Proto-oncogene c-Fos	P01100	Genecards
GNRH1	Progonadoliberin-1	P01148	Genecards
AVP	Vasopressin-neurophysin 2-copeptin	P01185	Genecards
GH1	Somatotropin	P01241	Genecards
CALCA	Calcitonin [Cleaved into: Calcitonin; Katacalcin	P01258	Genecards
TG	Thyroglobulin	P01266	Genecards
GCG	Glucagon [Cleaved into: Glicentin; Glicentin-related polypeptide	P01275	Genecards
INS	Insulin [Cleaved into: Insulin B chain; Insulin A chain]	P01308	Genecards
TNF	Tumor necrosis factor	P01375	Genecards
EPO	Erythropoietin	P01588	Genecards
MB	Myoglobin	P02144	Genecards
COL2A1	Collagen alpha-1	P02458	Genecards
APOA2	Apolipoprotein A-II	P02652	Genecards
FGA	Fibrinogen alpha chain [Cleaved into: Fibrinopeptide A; Fibrinogen alpha chain]	P02671	Genecards
CRP	C-reactive protein [Cleaved into: C-reactive protein	P02741	Genecards
FN1	Fibronectin	P02751	Genecards
TTR	Transthyretin	P02766	Genecards
AFP	Alpha-fetoprotein	P02771	Genecards
GC	Vitamin D-binding protein	P02774	Genecards
TF	Serotransferrin	P02787	Genecards
BGLAP	Osteocalcin	P02818	Genecards
ESR1	Estrogen receptor	P03372	Genecards
SLPI	Antileukoproteinase	P03973	Genecards
CAT	Catalase	P04040	Genecards
GBA	Glucosylceramidase	P04062	Genecards
FUCA1	Tissue alpha-L-fucosidase	P04066	Genecards
LCAT	Phosphatidylcholine-sterol acyltransferase	P04180	Genecards
VWF	von Willebrand factor	P04275	Genecards
SHBG	Sex hormone-binding globulin	P04278	Genecards
IGF1	Insulin-like growth factor I	P05019	Genecards
ALDOB	Fructose-bisphosphate aldolase B	P05062	Genecards
SERPINE1	Plasminogen activator inhibitor 1	P05121	Genecards
IL6	Interleukin-6	P05231	Genecards
EDN1	Endothelin-1	P05305	Genecards
ICAM1	Intercellular adhesion molecule 1	P05362	Genecards
UROD	Uroporphyrinogen decarboxylase	P06132	Genecards
GLA	Alpha-galactosidase A	P06280	Genecards
APOA4	Apolipoprotein A-IV	P06727	Genecards
PYGL	Glycogen phosphorylase, liver form	P06737	Genecards
TPO	Thyroid peroxidase	P07202	Genecards
THBD	Thrombomodulin	P07204	Genecards
PSAP	Prosaposin	P07602	Genecards
UMOD	Uromodulin	P07911	Genecards
CD55	Complement decay-accelerating factor	P08174	Genecards
ELANE	Neutrophil elastase	P08246	Genecards
HMBS	Porphobilinogen deaminase	P08397	Genecards
MGP	Matrix Gla protein	P08493	Genecards
LPA	Apolipoprotein	P08519	Genecards
CFH	Complement factor H	P08603	Genecards
CYP3A4	Cytochrome P450 3A4	P08684	Genecards
F7	Coagulation factor VII	P08709	Genecards
ANXA5	Annexin A5	P08758	Genecards
IGFBP1	Insulin-like growth factor-binding protein 1	P08833	Genecards
CXCL1	Growth-regulated alpha protein	P09341	Genecards
CGB3	Choriogonadotropin subunit beta 3	P0DN86	Genecards
GAA	Lysosomal alpha-glucosidase	P10253	Genecards
SPP1	Osteopontin	P10451	Genecards
CYP2D6	Cytochrome P450 2D6	P10635	Genecards
CHGA	Chromogranin-A	P10645	Genecards
UROS	Uroporphyrinogen-III synthase	P10746	Genecards
GHR	Growth hormone receptor	P10912	Genecards
LIPC	Hepatic triacylglycerol lipase	P11150	Genecards
PYGM	Glycogen phosphorylase, muscle form	P11217	Genecards
CYP19A1	Aromatase	P11511	Genecards
CDK4	Cyclin-dependent kinase 4	P11802	Genecards
CD79A	B-cell antigen receptor complex-associated protein alpha chain	P11912	Genecards
FABP2	Fatty acid-binding protein, intestinal	P12104	Genecards
ACE	Angiotensin-converting enzyme	P12821	Genecards
MYH7	Myosin-7	P12883	Genecards
PEPD	Xaa-Pro dipeptidase	P12955	Genecards
ALAS1	5-aminolevulinate synthase, nonspecific, mitochondrial	P13196	Genecards
LAMP2	Lysosome-associated membrane glycoprotein 2	P13473	Genecards
CCL2	C-C motif chemokine 2	P13500	Genecards
CCL5	C-C motif chemokine 5	P13501	Genecards
ALAD	Delta-aminolevulinic acid dehydratase	P13716	Genecards
F3	Tissue factor	P13726	Genecards
ADRB3	Beta-3 adrenergic receptor	P13945	Genecards
MMP9	Matrix metalloproteinase-9	P14780	Genecards
BRAF	Serine/threonine-protein kinase B-raf	P15056	Genecards
GLUL	Glutamine synthetase	P15104	Genecards
AKR1B1	Aldose reductase	P15121	Genecards
VEGFA	Vascular endothelial growth factor A	P15692	Genecards
TIMP2	Metalloproteinase inhibitor 2	P16035	Genecards
PNLIP	Pancreatic triacylglycerol lipase	P16233	Genecards
HIST1H1B	Histone H1.5	P16401	Genecards
GNB3	Guanine nucleotide-binding protein G	P16520	Genecards
SELE	E-selectin	P16581	Genecards
NAGA	Alpha-N-acetylgalactosaminidase	P17050	Genecards
HMGA1	High mobility group protein HMG-I/HMG-Y	P17096	Genecards
DES	Desmin	P17661	Genecards
IGFBP3	Insulin-like growth factor-binding protein 3	P17936	Genecards
VCAM1	Vascular cell adhesion protein 1	P19320	Genecards
TNNI3	Troponin I, cardiac muscle	P19429	Genecards
GGT1	Glutathione hydrolase 1 proenzyme	P19440	Genecards
WT1	Wilms tumor protein	P19544	Genecards
CEL	Bile salt-activated lipase	P19835	Genecards
COX5A	Cytochrome c oxidase subunit 5A, mitochondrial	P20674	Genecards
DDC	Aromatic-L-amino-acid decarboxylase	P20711	Genecards
AGA	N	P20933	Genecards
RPS4Y1	40S ribosomal protein S4, Y isoform 1	P22090	Genecards
IL10	Interleukin-10	P22301	Genecards
ACHE	Acetylcholinesterase	P22303	Genecards
FECH	Ferrochelatase, mitochondrial	P22830	Genecards
GPT	Alanine aminotransferase 1	P24298	Genecards
PON1	Serum paraoxonase/arylesterase 1	P27169	Genecards
NOS3	Nitric oxide synthase, endothelial	P29474	Genecards
AKT2	RAC-beta serine/threonine-protein kinase	P31751	Genecards
GK	Glycerol kinase	P32189	Genecards
SLC8A1	Sodium/calcium exchanger 1	P32418	Genecards
ICAM3	Intercellular adhesion molecule 3	P32942	Genecards
EPHX2	Bifunctional epoxide hydrolase 2 [Includes: Cytosolic epoxide hydrolase 2	P34913	Genecards
SERPINB6	Serpin B6	P35237	Genecards
IRS1	Insulin receptor substrate 1	P35568	Genecards
AGL	Glycogen debranching enzyme	P35573	Genecards
G6PC	Glucose-6-phosphatase	P35575	Genecards
FUS	RNA-binding protein FUS	P35637	Genecards
CHKA	Choline kinase alpha	P35790	Genecards
CPOX	Oxygen-dependent coproporphyrinogen-III oxidase, mitochondrial	P36551	Genecards
FDFT1	Squalene synthase	P37268	Genecards
LIPA	Lysosomal acid lipase/cholesteryl ester hydrolase	P38571	Genecards
APOBEC1	C->U-editing enzyme APOBEC-1	P41238	Genecards
MTHFR	Methylenetetrahydrofolate reductase	P42898	Genecards
PHKA2	Phosphorylase b kinase regulatory subunit alpha, liver isoform	P46019	Genecards
XDH	Xanthine dehydrogenase/oxidase [Includes: Xanthine dehydrogenase	P47989	Genecards
CXCL12	Stromal cell-derived factor 1	P48061	Genecards
TGM4	Protein-glutamine gamma-glutamyltransferase 4	P49221	Genecards
FASN	Fatty acid synthase	P49327	Genecards
MNX1	Motor neuron and pancreas homeobox protein 1	P50219	Genecards
PPOX	Protoporphyrinogen oxidase	P50336	Genecards
CPT1A	Carnitine O-palmitoyltransferase 1, liver isoform	P50416	Genecards
RAB27A	Ras-related protein Rab-27A	P51159	Genecards
CCR5	C-C chemokine receptor type 5	P51681	Genecards
DGKE	Diacylglycerol kinase epsilon	P52429	Genecards
ARHGDIA	Rho GDP-dissociation inhibitor 1	P52565	Genecards
HMGA2	High mobility group protein HMGI-C	P52926	Genecards
PRKAA2	5'-AMP-activated protein kinase catalytic subunit alpha-2	P54646	Genecards
GYS2	Glycogen [starch] synthase, liver	P54840	Genecards
EMP2	Epithelial membrane protein 2	P54851	Genecards
AIF1	Allograft inflammatory factor 1	P55008	Genecards
NR1H2	Oxysterols receptor LXR-beta	P55055	Genecards
CASP9	Caspase-9	P55211	Genecards
LAMB2	Laminin subunit beta-2	P55268	Genecards
NUP107	Nuclear pore complex protein Nup107	P57740	Genecards
PTEN	Phosphatidylinositol 3,4,5-trisphosphate 3-phosphatase and dual-specificity protein phosphatase PTEN	P60484	Genecards
RPS4X	40S ribosomal protein S4, X isoform	P62701	Genecards
GABRE	Gamma-aminobutyric acid receptor subunit epsilon	P78334	Genecards
OLR1	Oxidized low-density lipoprotein receptor 1	P78380	Genecards
VLDLR	Very low-density lipoprotein receptor	P98155	Genecards
LRP2	Low-density lipoprotein receptor-related protein 2	P98164	Genecards
CYCS	Cytochrome c	P99999	Genecards
MDM2	E3 ubiquitin-protein ligase Mdm2	Q00987	Genecards
TSPY1	Testis-specific Y-encoded protein 1	Q01534	Genecards
COL4A3	Collagen alpha-3	Q01955	Genecards
CYP27A1	Sterol 26-hydroxylase, mitochondrial	Q02318	Genecards
PAX2	Paired box protein Pax-2	Q02962	Genecards
CFHR3	Complement factor H-related protein 3	Q02985	Genecards
LMNB2	Lamin-B2	Q03252	Genecards
CFHR1	Complement factor H-related protein 1	Q03591	Genecards
GBE1	1,4-alpha-glucan-branching enzyme	Q04446	Genecards
SRY	Sex-determining region Y protein	Q05066	Genecards
LIPE	Hormone-sensitive lipase	Q05469	Genecards
TJP1	Tight junction protein ZO-1	Q07157	Genecards
C17orf67	Uncharacterized protein C17orf67	Q0P5P2	Genecards
ST3GAL4	CMP-N-acetylneuraminate-beta-galactosamide-alpha-2,3-sialyltransferase 4	Q11206	Genecards
SREBF2	Sterol regulatory element-binding protein 2	Q12772	Genecards
MYO1E	Unconventional myosin-Ie	Q12965	Genecards
PLA2G7	Platelet-activating factor acetylhydrolase	Q13093	Genecards
NR1H3	Oxysterols receptor LXR-alpha	Q13133	Genecards
BAAT	Bile acid-CoA:amino acid N-acyltransferase	Q14032	Genecards
ITIH4	Inter-alpha-trypsin inhibitor heavy chain H4	Q14624	Genecards
COG2	Conserved oligomeric Golgi complex subunit 2	Q14746	Genecards
OXA1L	Mitochondrial inner membrane protein OXA1L	Q15070	Genecards
AGER	Advanced glycosylation end product-specific receptor	Q15109	Genecards
PON2	Serum paraoxonase/arylesterase 2	Q15165	Genecards
PTGIS	Prostacyclin synthase	Q16647	Genecards
PTPRO	Receptor-type tyrosine-protein phosphatase O	Q16827	Genecards
INF2	Inverted formin-2	Q27J81	Genecards
DCAF17	DDB1- and CUL4-associated factor 17	Q5H9S7	Genecards
CRB2	Protein crumbs homolog 2	Q5IJ48	Genecards
EFHC2	EF-hand domain-containing family member C2	Q5JST6	Genecards
LDLRAP1	Low density lipoprotein receptor adapter protein 1	Q5SW96	Genecards
AXDND1	Axonemal dynein light chain domain-containing protein 1	Q5T1B0	Genecards
KANK2	KN motif and ankyrin repeat domain-containing protein 2	Q63ZY3	Genecards
CREB3L3	Cyclic AMP-responsive element-binding protein 3-like protein 3	Q68CJ9	Genecards
EDC4	Enhancer of mRNA-decapping protein 4	Q6P2E9	Genecards
CCBE1	Collagen and calcium-binding EGF domain-containing protein 1	Q6UXH8	Genecards
LIPI	Lipase member I	Q6XZB0	Genecards
UNC13D	Protein unc-13 homolog D	Q70J99	Genecards
ASXL2	Putative Polycomb group protein ASXL2	Q76L83	Genecards
APTX	Aprataxin	Q7Z2E3	Genecards
MAGI2	Membrane-associated guanylate kinase, WW and PDZ domain-containing protein 2	Q86UL8	Genecards
NUP93	Nuclear pore complex protein Nup93	Q8N1F7	Genecards
ARHGAP24	Rho GTPase-activating protein 24	Q8N264	Genecards
TSTD1	Thiosulfate:glutathione sulfurtransferase	Q8NFU3	Genecards
SCARB1	Scavenger receptor class B member 1	Q8WTV0	Genecards
CFHR4	Complement factor H-related protein 4	Q92496	Genecards
CPT1B	Carnitine O-palmitoyltransferase 1, muscle isoform	Q92523	Genecards
NUP205	Nuclear pore complex protein Nup205	Q92621	Genecards
TFG	Protein TFG	Q92734	Genecards
ARHGEF1	Rho guanine nucleotide exchange factor 1	Q92888	Genecards
LPP	Lipoma-preferred partner	Q93052	Genecards
PNPLA2	Patatin-like phospholipase domain-containing protein 2	Q96AD5	Genecards
CIDEC	Cell death activator CIDE-3	Q96AQ7	Genecards
COQ8B	Atypical kinase COQ8B, mitochondrial	Q96D53	Genecards
KIRREL1	Kin of IRRE-like protein 1	Q96J84	Genecards
LMF1	Lipase maturation factor 1	Q96S06	Genecards
LYST	Lysosomal-trafficking regulator	Q99698	Genecards
MTR	Methionine synthase	Q99707	Genecards
ALG1	Chitobiosyldiphosphodolichol beta-mannosyltransferase	Q9BT22	Genecards
MLPH	Melanophilin	Q9BV36	Genecards
CFHR5	Complement factor H-related protein 5	Q9BXR6	Genecards
ANGPTL4	Angiopoietin-related protein 4	Q9BY76	Genecards
TRPV6	Transient receptor potential cation channel subfamily V member 6	Q9H1D0	Genecards
ABCG8	ATP-binding cassette sub-family G member 8	Q9H221	Genecards
ABCG5	ATP-binding cassette sub-family G member 5	Q9H222	Genecards
TP63	Tumor protein 63	Q9H3D4	Genecards
TRPV4	Transient receptor potential cation channel subfamily V member 4	Q9HBA0	Genecards
SYTL2	Synaptotagmin-like protein 2	Q9HCH5	Genecards
NPHS2	Podocin	Q9NP85	Genecards
A4GALT	Lactosylceramide 4-alpha-galactosyltransferase	Q9NPC4	Genecards
TRPV5	Transient receptor potential cation channel subfamily V member 5	Q9NQA5	Genecards
ANLN	Anillin	Q9NQW6	Genecards
SLC17A5	Sialin	Q9NRA2	Genecards
PRMT7	Protein arginine N-methyltransferase 7	Q9NVM4	Genecards
PLCE1	1-phosphatidylinositol 4,5-bisphosphate phosphodiesterase epsilon-1	Q9P212	Genecards
C5AR2	C5a anaphylatoxin chemotactic receptor 2	Q9P296	Genecards
MTRR	Methionine synthase reductase	Q9UBK8	Genecards
GABBR1	Gamma-aminobutyric acid type B receptor subunit 1	Q9UBS5	Genecards
PRKAG2	5'-AMP-activated protein kinase subunit gamma-2	Q9UGJ0	Genecards
TRPC6	Short transient receptor potential channel 6	Q9Y210	Genecards
CHKB	Choline/ethanolamine kinase	Q9Y259	Genecards
GPSM3	G-protein-signaling modulator 3	Q9Y4H4	Genecards
MYO5A	Unconventional myosin-Va	Q9Y4I1	Genecards
CD2AP	CD2-associated protein	Q9Y5K6	Genecards
LHFPL6	LHFPL tetraspan subfamily member 6 protein	Q9Y693	Genecards
NUMBL	Numb-like protein	Q9Y6R0	Genecards
ABCA1	ATP-binding cassette sub-family A member 1	O95477	Drugbank,Genecards
SOAT1	Sterol O-acyltransferase 1	P35610	Drugbank,Genecards
NPC1L1	NPC1-like intracellular cholesterol transporter 1	Q9UHC9	Drugbank,OMIM,Genecards
HMGCR	3-hydroxy-3-methylglutaryl-coenzyme A reductase	P04035	Drugbank,TTD,Genecards
CES1	Liver carboxylesterase 1	P23141	Drugbank,TTD,Genecards
PPARG	Peroxisome proliferator-activated receptor gamma	P37231	Drugbank,TTD,Genecards
MTTP	Microsomal triglyceride transfer protein large subunit	P55157	Drugbank,TTD,Genecards
PPARA	Peroxisome proliferator-activated receptor alpha	Q07869	Drugbank,TTD,Genecards
PCSK9	Proprotein convertase subtilisin/kexin type 9	Q8NBP7	Drugbank,TTD,OMIM,Genecards
LRP6	Low-density lipoprotein receptor-related protein 6	O75581	OMIM,Genecards
LDLR	Low-density lipoprotein receptor	P01130	OMIM,Genecards
LMNA	Prelamin-A/C [Cleaved into: Lamin-A/C	P02545	OMIM,Genecards
APOC1	Apolipoprotein C-I	P02654	OMIM,Genecards
APOC2	Apolipoprotein C-II	P02655	OMIM,Genecards
APOC3	Apolipoprotein C-III	P02656	OMIM,Genecards
ALB	Serum albumin	P02768	OMIM,Genecards
ALOX5	Arachidonate 5-lipoxygenase	P09917	OMIM,Genecards
SELP	P-selectin	P16109	OMIM,Genecards
CD36	Platelet glycoprotein 4	P16671	OMIM,Genecards
USF1	Upstream stimulatory factor 1	P22415	OMIM,Genecards
SREBF1	Sterol regulatory element-binding protein 1	P36956	OMIM,Genecards
LEP	Leptin	P41159	OMIM,Genecards
LEPR	Leptin receptor	P48357	OMIM,Genecards
ADIPOQ	Adiponectin	Q15848	OMIM,Genecards
APOA5	Apolipoprotein A-V	Q6Q788	OMIM,Genecards
GPIHBP1	Glycosylphosphatidylinositol-anchored high density lipoprotein-binding protein 1	Q8IV16	OMIM,Genecards
NR1H4	Bile acid receptor	Q96RI1	OMIM,Genecards
TXNIP	Thioredoxin-interacting protein	Q9H3M7	OMIM,Genecards
SH2B1	SH2B adapter protein 1	Q9NRF2	OMIM,Genecards
APOA1	Apolipoprotein A-I	P02647	TTD,Genecards
APOB	Apolipoprotein B-100	P04114	TTD,Genecards
INSR	Insulin receptor	P06213	TTD,Genecards
LPL	Lipoprotein lipase	P06858	TTD,Genecards
CYP7A1	Cholesterol 7-alpha-monooxygenase	P22680	TTD,Genecards
PLTP	Phospholipid transfer protein	P55058	TTD,Genecards
PPARD	Peroxisome proliferator-activated receptor delta	Q03181	TTD,Genecards
SLC10A2	Ileal sodium/bile acid cotransporter	Q12908	TTD,Genecards
ANGPTL3	Angiopoietin-related protein 3	Q9Y5C1	TTD,Genecards
SCAP	Sterol regulatory element-binding protein cleavage-activating protein	Q12770	TTD,OMIM
HCAR2	Hydroxycarboxylic acid receptor 2	Q8TDS4	TTD,OMIM
APOE	Apolipoprotein E	P02649	TTD,OMIM,Genecards
CETP	Cholesteryl ester transfer protein	P11597	TTD,OMIM,Genecards
