# Supplementary material for: The Potential Mechanism of Wuwei Qingzhuo San against Hyperlipidemia Based on TCM Network Pharmacology and Validation Experiments in Hyperlipidemia Hamster
Source: Evid Based Complement Alternat Med. 2020 May 10;2020:5369025. doi: 10.1155/2020/5369025 (PMC7212318; doi:10.1155/2020/5369025)
Supplement: Supplementary Materials — include the following. Supplementary Table 1: information of compounds from five herbal medicines in WWQZS collected from public data resources and Information of candidate compounds of five herbal medicines in WWQZS after screening. Supplementary Table 2: the details of targets from compounds in Shiliu, Honghua, Bibo, Doukou, and Rougui. Supplementary Table 3: known hyperlipidemia-related targets. WWQZS shared 43 potential targets with known anti-hyperlipidemia targets. Supplementary Table 4: the degrees and betweennesses of nodes in 45 candidate targets network. Supplementary Table 5: the BP, MF, and CC enrichment analyses for targets of WWQZS against hyperlipidemia. Supplementary Table 6: the KEGG pathways enrichment analysis for targets of WWQZS against hyperlipidemia. [file 5369025.f1.zip › 5369025.f1/supplement table 4.xlsx]

## Sheet: potential targets
WWQZS shared 43 potential targets with known anti-hyperlipidemia targets
Gene Symbol	Target Protein Name	Uniprot ID
CYP3A4	Cytochrome P450 3A4	P08684
XDH	Xanthine dehydrogenase/oxidase [Includes: Xanthine dehydrogenase]	P47989
ACHE	Acetylcholinesterase	P22303
TNF	Tumor necrosis factor	P01375
CCL2	C-C motif chemokine 2	P13500
HMGCR	3-hydroxy-3-methylglutaryl-coenzyme A reductase	P04035
ADORA2A	Adenosine receptor A2a	P29274
PPARG	Peroxisome proliferator-activated receptor gamma	P37231
ITGB2	Integrin beta-2	P05107
TLR4	Toll-like receptor 4	O00206
VCAM1	Vascular cell adhesion protein 1	P19320
ACE	Angiotensin-converting enzyme	P12821
PTGIS	Prostacyclin synthase	Q16647
INS	Insulin [Cleaved into: Insulin B chain; Insulin A chain]	P01308
HMOX1	Heme oxygenase 1	P09601
FASN	Fatty acid synthase	P49327
TPO	Thyroid peroxidase	P07202
NOS3	Nitric oxide synthase, endothelial	P29474
CAT	Catalase	P04040
INSR	Insulin receptor	P06213
DPP4	Dipeptidyl peptidase 4	P27487
PLAT	Tissue-type plasminogen activator	P00750
SOAT1	Sterol O-acyltransferase 1	P35610
LPL	Lipoprotein lipase	P06858
SELP	P-selectin	P16109
IL6	Interleukin-6	P05231
RXRB	Retinoic acid receptor RXR-beta	P28702
RXRA	Retinoic acid receptor RXR-alpha	P19793
RXRG	Retinoic acid receptor RXR-gamma	P48443
ESR1	Estrogen receptor	P03372
F7	Coagulation factor VII	P08709
ESR2	Estrogen receptor beta	Q92731
SOD1	Superoxide dismutase [Cu-Zn]	P00441
CDK4	Cyclin-dependent kinase 4	P11802
THBD	Thrombomodulin	P07204
F3	Tissue factor	P13726
VEGFA	Vascular endothelial growth factor A	P15692
AKR1B1	Aldose reductase	P15121
MGAM	Maltase-glucoamylase, intestinal [Includes: Maltase	O43451
F2	Prothrombin	P00734
PON1	Serum paraoxonase/arylesterase 1	P27169
ALOX5	Arachidonate 5-lipoxygenase	P09917
SELE	E-selectin	P16581

## Sheet: candidate targets
The degrees and betweennesses of nodes in 45 candidate target network
Gene Symbol	Target Protein Name	Uniprot ID	Dgree	Betweenness Centrality
MAPK8	Mitogen-activated protein kinase 8	P45983	42	0.00811339
TP53	Cellular tumor antigen p53	P04637	43	0.00936866
F2	Prothrombin	P00734	39	0.00462486
CALM1	Calmodulin-1	P0DP23	34	0.00270655
EGF	Pro-epidermal growth factor	P01133	39	0.00373667
REN	Renin	P00797	34	0.00238045
VCAM1	Vascular cell adhesion protein 1	P19320	32	0.00226021
AGT	Angiotensinogen	P01019	24	0.00107176
INS	Insulin [Cleaved into: Insulin B chain; Insulin A chain]	P01308	42	0.00709207
HMOX1	Heme oxygenase 1	P09601	28	0.00132002
PIK3CB	Phosphatidylinositol 4,5-bisphosphate 3-kinase catalytic subunit beta isoform	P42338	41	0.00759086
INSR	Insulin receptor	P06213	38	0.00506928
PTPN11	Tyrosine-protein phosphatase non-receptor type 11	Q06124	23	0.00015294
CCL2	C-C motif chemokine 2	P13500	36	0.00387652
SERPINE1	Plasminogen activator inhibitor 1	P05121	31	0.00297126
NOS3	Nitric oxide synthase, endothelial	P29474	41	0.0063659
TLR4	Toll-like receptor 4	O00206	35	0.00479001
ACE	Angiotensin-converting enzyme	P12821	34	0.00369535
JUN	Transcription factor AP-1	P05412	44	0.0114526
PPARG	Peroxisome proliferator-activated receptor gamma	P37231	37	0.0041883
PPARA	Peroxisome proliferator-activated receptor alpha	Q07869	18	0.00022032
PIK3CG	Phosphatidylinositol 4,5-bisphosphate 3-kinase catalytic subunit gamma isoform	P48736	41	0.00759086
IGF1	Insulin-like growth factor I	P05019	41	0.00724558
PIK3CA	Phosphatidylinositol 4,5-bisphosphate 3-kinase catalytic subunit alpha isoform	P42336	42	0.00884612
MMP2	72 kDa type IV collagenase	P08253	30	0.0012008
MAPK3	Mitogen-activated protein kinase 3	P27361	42	0.00709207
CREB1	Cyclic AMP-responsive element-binding protein 1	P16220	35	0.0025944
CAT	Catalase	P04040	35	0.00356942
FOS	Proto-oncogene c-Fos	P01100	40	0.00463831
SOD2	Superoxide dismutase [Mn], mitochondrial	P04179	26	0.00059946
TNF	Tumor necrosis factor	P01375	44	0.0114526
HRAS	GTPase HRas	P01112	36	0.00404792
CALM3	Calmodulin-3	P0DP25	34	0.00270655
CASP3	Caspase-3	P42574	40	0.00651012
BIRC2	Baculoviral IAP repeat-containing protein 2	Q13490	15	0.00011436
BIRC3	Baculoviral IAP repeat-containing protein 3	Q13489	19	0.00076614
AKT1	RAC-alpha serine/threonine-protein kinase	P31749	44	0.0114526
MTOR	Serine/threonine-protein kinase mTOR	P42345	34	0.00197373
MAPK1	Mitogen-activated protein kinase 1	P28482	43	0.00962377
CYCS	Cytochrome c	P99999	36	0.00442978
KRAS	GTPase KRas	P01116	28	0.00067271
CALM2	Calmodulin-2	P0DP24	34	0.00270655
PLG	Plasminogen	P00747	32	0.00165121
BCL2	Apoptosis regulator Bcl-2	P10415	44	0.0114526
PTEN	Phosphatidylinositol 3,4,5-trisphosphate 3-phosphatase and dual-specificity protein phosphatase PTEN	P60484	34	0.00331664
