# Supplementary material for: The Potential Mechanism of Wuwei Qingzhuo San against Hyperlipidemia Based on TCM Network Pharmacology and Validation Experiments in Hyperlipidemia Hamster
Source: Evid Based Complement Alternat Med. 2020 May 10;2020:5369025. doi: 10.1155/2020/5369025 (PMC7212318; doi:10.1155/2020/5369025)
Supplement: Supplementary Materials — include the following. Supplementary Table 1: information of compounds from five herbal medicines in WWQZS collected from public data resources and Information of candidate compounds of five herbal medicines in WWQZS after screening. Supplementary Table 2: the details of targets from compounds in Shiliu, Honghua, Bibo, Doukou, and Rougui. Supplementary Table 3: known hyperlipidemia-related targets. WWQZS shared 43 potential targets with known anti-hyperlipidemia targets. Supplementary Table 4: the degrees and betweennesses of nodes in 45 candidate targets network. Supplementary Table 5: the BP, MF, and CC enrichment analyses for targets of WWQZS against hyperlipidemia. Supplementary Table 6: the KEGG pathways enrichment analysis for targets of WWQZS against hyperlipidemia. [file 5369025.f1.zip › 5369025.f1/supplement table 5.xlsx]

## Sheet: GO Biological Processes
The BP enrichment analysis for targets of WWQZS against hyperlipidemia
GroupID	Category	Term	Description	LogP	Belongs	Target Number	Gene Symbols
1 Summary	response to wounding
1 Member	GO Biological Processes	GO:0009611	response to wounding	-27.9891	shared	31	ACHE,ADORA2A,BCL2,CASP3,F2,F3,F7,MTOR,HMGCR,HMOX1,HRAS,IGF1,IL6,INS,JUN,NOS3,SERPINE1,PIK3CA,PIK3CB,PIK3CG,PLAT,PLG,PPARA,MAPK1,MAPK3,PTEN,PTPN11,SELP,SOD1,THBD,TLR4
1 Member	GO Biological Processes	GO:0010544	negative regulation of platelet activation	-4.61256	potential targets	3	F2,NOS3,THBD
1 Member	GO Biological Processes	GO:0050866	negative regulation of cell activation	-4.62488	shared	6	ADORA2A,CASP3,F2,HMOX1,NOS3,THBD
1 Member	GO Biological Processes	GO:0051917	regulation of fibrinolysis	-7.03447	candidate targets	4	F2,SERPINE1,PLG,THBD
1 Member	GO Biological Processes	GO:0010543	regulation of platelet activation	-7.41873	shared	5	F2,NOS3,SELP,THBD,TLR4
1 Member	GO Biological Processes	GO:0042730	fibrinolysis	-7.6623	shared	5	F2,SERPINE1,PLAT,PLG,THBD
1 Member	GO Biological Processes	GO:0050819	negative regulation of coagulation	-7.66433	shared	6	F2,NOS3,SERPINE1,PLAT,PLG,THBD
1 Member	GO Biological Processes	GO:0051918	negative regulation of fibrinolysis	-7.7085	candidate targets	4	F2,SERPINE1,PLG,THBD
1 Member	GO Biological Processes	GO:0030195	negative regulation of blood coagulation	-7.91998	shared	6	F2,NOS3,SERPINE1,PLAT,PLG,THBD
1 Member	GO Biological Processes	GO:1903035	negative regulation of response to wounding	-9.63355	shared	8	F2,HMGCR,NOS3,SERPINE1,PLAT,PLG,PTEN,THBD
1 Member	GO Biological Processes	GO:0061045	negative regulation of wound healing	-10.2403	shared	8	F2,HMGCR,NOS3,SERPINE1,PLAT,PLG,PTEN,THBD
1 Member	GO Biological Processes	GO:0050818	regulation of coagulation	-13.0508	shared	10	F2,F3,F7,NOS3,SERPINE1,PLAT,PLG,SELP,THBD,TLR4
1 Member	GO Biological Processes	GO:0030168	platelet activation	-13.2161	shared	12	F2,IL6,NOS3,PIK3CA,PIK3CB,PIK3CG,MAPK1,MAPK3,PTPN11,SELP,THBD,TLR4
1 Member	GO Biological Processes	GO:1900046	regulation of hemostasis	-13.3995	shared	10	F2,F3,F7,NOS3,SERPINE1,PLAT,PLG,SELP,THBD,TLR4
1 Member	GO Biological Processes	GO:1900047	negative regulation of hemostasis	-7.91998	shared	6	F2,NOS3,SERPINE1,PLAT,PLG,THBD
1 Member	GO Biological Processes	GO:0050820	positive regulation of coagulation	-13.8217	shared	8	F2,F3,F7,SERPINE1,PLG,SELP,THBD,TLR4
1 Member	GO Biological Processes	GO:0030193	regulation of blood coagulation	-13.3995	shared	10	F2,F3,F7,NOS3,SERPINE1,PLAT,PLG,SELP,THBD,TLR4
1 Member	GO Biological Processes	GO:0050878	regulation of body fluid levels	-18.7887	shared	22	ADORA2A,AKR1B1,CREB1,F2,F3,F7,IL6,NOS3,SERPINE1,PIK3CA,PIK3CB,PIK3CG,PLAT,PLG,MAPK1,MAPK3,PTPN11,SELP,THBD,TLR4,VEGFA,XDH
1 Member	GO Biological Processes	GO:0061041	regulation of wound healing	-17.2153	shared	14	F2,F3,F7,MTOR,HMGCR,HRAS,NOS3,SERPINE1,PLAT,PLG,PTEN,SELP,THBD,TLR4
1 Member	GO Biological Processes	GO:0007596	blood coagulation	-16.822	shared	18	ADORA2A,F2,F3,F7,IL6,NOS3,SERPINE1,PIK3CA,PIK3CB,PIK3CG,PLAT,PLG,MAPK1,MAPK3,PTPN11,SELP,THBD,TLR4
1 Member	GO Biological Processes	GO:0007599	hemostasis	-16.7078	shared	18	ADORA2A,F2,F3,F7,IL6,NOS3,SERPINE1,PIK3CA,PIK3CB,PIK3CG,PLAT,PLG,MAPK1,MAPK3,PTPN11,SELP,THBD,TLR4
1 Member	GO Biological Processes	GO:0050817	coagulation	-16.6852	shared	18	ADORA2A,F2,F3,F7,IL6,NOS3,SERPINE1,PIK3CA,PIK3CB,PIK3CG,PLAT,PLG,MAPK1,MAPK3,PTPN11,SELP,THBD,TLR4
1 Member	GO Biological Processes	GO:0042060	wound healing	-24.6838	shared	27	ADORA2A,CASP3,F2,F3,F7,MTOR,HMGCR,HMOX1,HRAS,IGF1,IL6,INS,NOS3,SERPINE1,PIK3CA,PIK3CB,PIK3CG,PLAT,PLG,PPARA,MAPK1,MAPK3,PTEN,PTPN11,SELP,THBD,TLR4
1 Member	GO Biological Processes	GO:0090303	positive regulation of wound healing	-14.7458	shared	10	F2,F3,F7,MTOR,HRAS,SERPINE1,PLG,SELP,THBD,TLR4
1 Member	GO Biological Processes	GO:1903036	positive regulation of response to wounding	-14.0543	shared	10	F2,F3,F7,MTOR,HRAS,SERPINE1,PLG,SELP,THBD,TLR4
1 Member	GO Biological Processes	GO:0030194	positive regulation of blood coagulation	-13.9732	shared	8	F2,F3,F7,SERPINE1,PLG,SELP,THBD,TLR4
1 Member	GO Biological Processes	GO:1900048	positive regulation of hemostasis	-13.9732	shared	8	F2,F3,F7,SERPINE1,PLG,SELP,THBD,TLR4
1 Member	GO Biological Processes	GO:1903034	regulation of response to wounding	-16.0969	shared	14	F2,F3,F7,MTOR,HMGCR,HRAS,NOS3,SERPINE1,PLAT,PLG,PTEN,SELP,THBD,TLR4
2 Summary	response to oxygen levels
2 Member	GO Biological Processes	GO:0070482	response to oxygen levels	-19.2014	shared	20	AKT1,BIRC2,BCL2,CASP3,CAT,CDK4,CREB1,DPP4,F7,MTOR,HMOX1,MMP2,PLAT,PPARA,PPARG,PTEN,PTGIS,TP53,VCAM1,VEGFA
2 Member	GO Biological Processes	GO:0071453	cellular response to oxygen levels	-8.14839	shared	9	AKT1,BCL2,MTOR,HMOX1,PPARG,PTEN,PTGIS,TP53,VEGFA
2 Member	GO Biological Processes	GO:0036293	response to decreased oxygen levels	-16.9742	shared	18	AKT1,BIRC2,BCL2,CASP3,CAT,CREB1,DPP4,F7,MTOR,HMOX1,MMP2,PLAT,PPARA,PTEN,PTGIS,TP53,VCAM1,VEGFA
2 Member	GO Biological Processes	GO:0001666	response to hypoxia	-17.2206	shared	18	AKT1,BIRC2,BCL2,CASP3,CAT,CREB1,DPP4,F7,MTOR,HMOX1,MMP2,PLAT,PPARA,PTEN,PTGIS,TP53,VCAM1,VEGFA
2 Member	GO Biological Processes	GO:0036294	cellular response to decreased oxygen levels	-7.19942	shared	8	AKT1,BCL2,MTOR,HMOX1,PTEN,PTGIS,TP53,VEGFA
2 Member	GO Biological Processes	GO:0071456	cellular response to hypoxia	-7.38506	shared	8	AKT1,BCL2,MTOR,HMOX1,PTEN,PTGIS,TP53,VEGFA
3 Summary	cytokine-mediated signaling pathway
3 Member	GO Biological Processes	GO:0019221	cytokine-mediated signaling pathway	-18.8379	shared	25	AKT1,ALOX5,BIRC2,BIRC3,BCL2,CASP3,F3,FOS,HMOX1,IL6,ITGB2,KRAS,MMP2,PIK3CA,PIK3CB,PPARG,MAPK3,PTPN11,CCL2,SOD1,SOD2,TNF,TP53,VCAM1,VEGFA
4 Summary	aging
4 Member	GO Biological Processes	GO:0007568	aging	-17.6505	shared	18	AGT,AKT1,BCL2,CAT,CREB1,FOS,MTOR,HMGCR,HRAS,ITGB2,JUN,KRAS,SERPINE1,PTEN,SOD1,SOD2,TP53,VCAM1
4 Member	GO Biological Processes	GO:0007569	cell aging	-8.61532	candidate targets	8	BCL2,MTOR,HRAS,KRAS,SERPINE1,PTEN,SOD1,TP53
4 Member	GO Biological Processes	GO:0007517	muscle organ development	-5.28597	candidate targets	9	ACHE,BCL2,CREB1,FOS,MTOR,HMGCR,IGF1,PTEN,RXRA
4 Member	GO Biological Processes	GO:0031647	regulation of protein stability	-3.76952	candidate targets	6	BCL2,CREB1,IGF1,KRAS,MAPK1,PTEN
4 Member	GO Biological Processes	GO:0007632	visual behavior	-4.71025	candidate targets	4	CREB1,MTOR,HMGCR,KRAS
4 Member	GO Biological Processes	GO:0008542	visual learning	-4.89415	candidate targets	4	CREB1,MTOR,HMGCR,KRAS
4 Member	GO Biological Processes	GO:0048634	regulation of muscle organ development	-5.05823	candidate targets	6	BCL2,CREB1,MTOR,HMGCR,IGF1,PTEN
4 Member	GO Biological Processes	GO:1901863	positive regulation of muscle tissue development	-5.06615	candidate targets	5	BCL2,CREB1,MTOR,HMGCR,IGF1
4 Member	GO Biological Processes	GO:0048636	positive regulation of muscle organ development	-5.09078	candidate targets	5	BCL2,CREB1,MTOR,HMGCR,IGF1
4 Member	GO Biological Processes	GO:0045844	positive regulation of striated muscle tissue development	-5.09078	candidate targets	5	BCL2,CREB1,MTOR,HMGCR,IGF1
4 Member	GO Biological Processes	GO:1901861	regulation of muscle tissue development	-5.09139	candidate targets	6	BCL2,CREB1,MTOR,HMGCR,IGF1,PTEN
4 Member	GO Biological Processes	GO:0016202	regulation of striated muscle tissue development	-5.12504	candidate targets	6	BCL2,CREB1,MTOR,HMGCR,IGF1,PTEN
4 Member	GO Biological Processes	GO:0060537	muscle tissue development	-6.28149	candidate targets	10	AGT,BCL2,CREB1,FOS,MTOR,HMGCR,IGF1,PTEN,RXRA,VEGFA
4 Member	GO Biological Processes	GO:0007610	behavior	-13.6693	shared	19	ADORA2A,AGT,BCL2,CASP3,CREB1,DPP4,FOS,MTOR,HMGCR,INS,INSR,JUN,KRAS,PPARA,MAPK1,PTEN,REN,SOD1,TP53
4 Member	GO Biological Processes	GO:0008306	associative learning	-6.84439	candidate targets	6	AGT,CREB1,FOS,MTOR,HMGCR,KRAS
4 Member	GO Biological Processes	GO:0007612	learning	-7.86618	candidate targets	8	AGT,CREB1,FOS,MTOR,HMGCR,INSR,JUN,KRAS
4 Member	GO Biological Processes	GO:0009314	response to radiation	-12.3236	shared	16	AKT1,BCL2,CALM1,CASP3,CAT,CREB1,FOS,MTOR,HMGCR,HRAS,JUN,KRAS,MAPK8,THBD,TP53,VCAM1
4 Member	GO Biological Processes	GO:0061061	muscle structure development	-8.71988	shared	15	ACHE,AGT,AKT1,BCL2,CREB1,FOS,MTOR,HMGCR,IGF1,KRAS,PTEN,RXRA,SOD2,TNF,VEGFA
4 Member	GO Biological Processes	GO:0007611	learning or memory	-9.46128	candidate targets	11	AGT,CASP3,CREB1,FOS,MTOR,HMGCR,INSR,JUN,KRAS,MAPK1,PTEN
4 Member	GO Biological Processes	GO:0009416	response to light stimulus	-9.66938	candidate targets	12	AKT1,BCL2,CALM1,CASP3,CAT,CREB1,FOS,MTOR,HMGCR,KRAS,MAPK8,TP53
4 Member	GO Biological Processes	GO:0050890	cognition	-10.0447	candidate targets	12	AGT,CASP3,CREB1,FOS,MTOR,HMGCR,INS,INSR,JUN,KRAS,MAPK1,PTEN
4 Member	GO Biological Processes	GO:0014706	striated muscle tissue development	-6.45468	candidate targets	10	AGT,BCL2,CREB1,FOS,MTOR,HMGCR,IGF1,PTEN,RXRA,VEGFA
5 Summary	gland development
5 Member	GO Biological Processes	GO:0048732	gland development	-16.1166	shared	19	AKT1,BCL2,CREB1,EGF,ESR1,FASN,HMOX1,INSR,JUN,KRAS,PIK3CA,MAPK1,MAPK3,PTEN,RXRA,SOD1,TNF,VEGFA,XDH
5 Member	GO Biological Processes	GO:0030855	epithelial cell differentiation	-5.33087	shared	12	AKT1,CASP3,CREB1,ESR1,JUN,SERPINE1,PPARG,RXRA,SOD1,TNF,VEGFA,XDH
5 Member	GO Biological Processes	GO:0030879	mammary gland development	-7.74482	shared	8	AKT1,CREB1,EGF,ESR1,FASN,MAPK1,VEGFA,XDH
6 Summary	muscle cell proliferation
6 Member	GO Biological Processes	GO:0033002	muscle cell proliferation	-15.1772	shared	15	AGT,AKT1,AKR1B1,MTOR,HMGCR,HMOX1,IGF1,IL6,JUN,MMP2,PPARG,PTEN,RXRA,SOD2,TNF
6 Member	GO Biological Processes	GO:0048661	positive regulation of smooth muscle cell proliferation	-14.0056	shared	11	AGT,AKT1,AKR1B1,MTOR,HMGCR,HMOX1,IGF1,IL6,JUN,MMP2,TNF
6 Member	GO Biological Processes	GO:1904705	regulation of vascular smooth muscle cell proliferation	-11.21	shared	9	AGT,HMOX1,IGF1,JUN,MMP2,PPARG,PTEN,SOD2,TNF
6 Member	GO Biological Processes	GO:1990874	vascular smooth muscle cell proliferation	-11.21	shared	9	AGT,HMOX1,IGF1,JUN,MMP2,PPARG,PTEN,SOD2,TNF
6 Member	GO Biological Processes	GO:0010660	regulation of muscle cell apoptotic process	-7.85866	shared	7	AGT,HMGCR,HMOX1,IGF1,PPARG,PTEN,SOD2
6 Member	GO Biological Processes	GO:0010657	muscle cell apoptotic process	-7.72476	shared	7	AGT,HMGCR,HMOX1,IGF1,PPARG,PTEN,SOD2
6 Member	GO Biological Processes	GO:1904707	positive regulation of vascular smooth muscle cell proliferation	-6.40502	candidate targets	5	AGT,IGF1,JUN,MMP2,TNF
6 Member	GO Biological Processes	GO:0048659	smooth muscle cell proliferation	-15.7552	shared	14	AGT,AKT1,AKR1B1,MTOR,HMGCR,HMOX1,IGF1,IL6,JUN,MMP2,PPARG,PTEN,SOD2,TNF
6 Member	GO Biological Processes	GO:1904706	negative regulation of vascular smooth muscle cell proliferation	-5.14591	candidate targets	4	HMOX1,PPARG,PTEN,SOD2
6 Member	GO Biological Processes	GO:1905288	vascular associated smooth muscle cell apoptotic process	-4.61256	candidate targets	3	IGF1,PPARG,SOD2
6 Member	GO Biological Processes	GO:0048662	negative regulation of smooth muscle cell proliferation	-4.1805	candidate targets	4	HMOX1,PPARG,PTEN,SOD2
6 Member	GO Biological Processes	GO:0034390	smooth muscle cell apoptotic process	-3.80228	candidate targets	3	IGF1,PPARG,SOD2
6 Member	GO Biological Processes	GO:0034391	regulation of smooth muscle cell apoptotic process	-3.80228	candidate targets	3	IGF1,PPARG,SOD2
6 Member	GO Biological Processes	GO:0010661	positive regulation of muscle cell apoptotic process	-7.13242	candidate targets	5	AGT,HMGCR,PPARG,PTEN,SOD2
6 Member	GO Biological Processes	GO:0048660	regulation of smooth muscle cell proliferation	-15.8669	shared	14	AGT,AKT1,AKR1B1,MTOR,HMGCR,HMOX1,IGF1,IL6,JUN,MMP2,PPARG,PTEN,SOD2,TNF
6 Member	GO Biological Processes	GO:1905459	regulation of vascular associated smooth muscle cell apoptotic process	-4.61256	candidate targets	3	IGF1,PPARG,SOD2
7 Summary	cardiovascular system development
7 Member	GO Biological Processes	GO:0072358	cardiovascular system development	-14.4995	shared	22	AGT,AKT1,EGF,F3,HMOX1,IL6,ITGB2,JUN,MMP2,NOS3,SERPINE1,PIK3CA,PIK3CB,PIK3CG,PPARG,MAPK1,PTEN,PTGIS,CCL2,SOD2,VEGFA,XDH
7 Member	GO Biological Processes	GO:0010594	regulation of endothelial cell migration	-4.11706	shared	6	AGT,AKT1,HMOX1,NOS3,PPARG,VEGFA
7 Member	GO Biological Processes	GO:0001944	vasculature development	-14.6005	shared	22	AGT,AKT1,EGF,F3,HMOX1,IL6,ITGB2,JUN,MMP2,NOS3,SERPINE1,PIK3CA,PIK3CB,PIK3CG,PPARG,MAPK1,PTEN,PTGIS,CCL2,SOD2,VEGFA,XDH
7 Member	GO Biological Processes	GO:0051345	positive regulation of hydrolase activity	-12.9196	shared	20	AGT,AKT1,CALM1,CALM2,CALM3,CASP3,ESR1,F3,MTOR,HRAS,JUN,PPARG,MAPK3,MAPK8,CCL2,SELE,TNF,VEGFA,XDH,CYCS
7 Member	GO Biological Processes	GO:0048514	blood vessel morphogenesis	-12.6885	shared	19	AGT,EGF,F3,HMOX1,IL6,ITGB2,JUN,MMP2,NOS3,SERPINE1,PIK3CA,PIK3CB,PIK3CG,PPARG,PTEN,PTGIS,CCL2,VEGFA,XDH
7 Member	GO Biological Processes	GO:0001525	angiogenesis	-12.6562	shared	18	AGT,EGF,F3,HMOX1,IL6,ITGB2,JUN,MMP2,NOS3,SERPINE1,PIK3CA,PIK3CB,PIK3CG,PPARG,PTEN,PTGIS,CCL2,VEGFA
7 Member	GO Biological Processes	GO:0050673	epithelial cell proliferation	-12.4457	shared	16	AKT1,ESR1,F3,MTOR,HMOX1,HRAS,IGF1,JUN,PIK3CB,PPARG,MAPK1,PTEN,CCL2,TNF,VEGFA,XDH
7 Member	GO Biological Processes	GO:0001935	endothelial cell proliferation	-10.5181	shared	11	AKT1,F3,MTOR,HMOX1,JUN,PIK3CB,PPARG,CCL2,TNF,VEGFA,XDH
7 Member	GO Biological Processes	GO:0010631	epithelial cell migration	-10.177	shared	13	AGT,AKT1,DPP4,MTOR,HMOX1,ITGB2,JUN,NOS3,PIK3CA,PPARG,PTEN,PTPN11,VEGFA
7 Member	GO Biological Processes	GO:0090132	epithelium migration	-10.1293	shared	13	AGT,AKT1,DPP4,MTOR,HMOX1,ITGB2,JUN,NOS3,PIK3CA,PPARG,PTEN,PTPN11,VEGFA
7 Member	GO Biological Processes	GO:0090130	tissue migration	-10.0354	shared	13	AGT,AKT1,DPP4,MTOR,HMOX1,ITGB2,JUN,NOS3,PIK3CA,PPARG,PTEN,PTPN11,VEGFA
7 Member	GO Biological Processes	GO:0050678	regulation of epithelial cell proliferation	-9.7426	shared	13	AKT1,F3,MTOR,HMOX1,HRAS,IGF1,JUN,PPARG,PTEN,CCL2,TNF,VEGFA,XDH
7 Member	GO Biological Processes	GO:0043536	positive regulation of blood vessel endothelial cell migration	-3.90475	shared	4	AKT1,HMOX1,NOS3,VEGFA
7 Member	GO Biological Processes	GO:0001936	regulation of endothelial cell proliferation	-9.52659	shared	10	AKT1,F3,MTOR,HMOX1,JUN,PPARG,CCL2,TNF,VEGFA,XDH
7 Member	GO Biological Processes	GO:1901342	regulation of vasculature development	-8.07205	shared	12	AGT,F3,HMOX1,IL6,ITGB2,NOS3,SERPINE1,PPARG,PTGIS,SOD2,VEGFA,XDH
7 Member	GO Biological Processes	GO:0043542	endothelial cell migration	-7.85962	shared	10	AGT,AKT1,DPP4,HMOX1,ITGB2,NOS3,PIK3CA,PPARG,PTEN,VEGFA
7 Member	GO Biological Processes	GO:0050679	positive regulation of epithelial cell proliferation	-6.6169	shared	8	AKT1,F3,MTOR,HMOX1,HRAS,IGF1,JUN,VEGFA
7 Member	GO Biological Processes	GO:0010632	regulation of epithelial cell migration	-6.56975	shared	9	AGT,AKT1,MTOR,HMOX1,JUN,NOS3,PPARG,PTEN,VEGFA
7 Member	GO Biological Processes	GO:0045765	regulation of angiogenesis	-6.45468	shared	10	AGT,F3,HMOX1,IL6,ITGB2,NOS3,SERPINE1,PPARG,PTGIS,VEGFA
7 Member	GO Biological Processes	GO:1904018	positive regulation of vasculature development	-6.1992	shared	8	F3,HMOX1,ITGB2,NOS3,SERPINE1,PTGIS,SOD2,VEGFA
7 Member	GO Biological Processes	GO:0010634	positive regulation of epithelial cell migration	-6.05185	shared	7	AGT,AKT1,MTOR,HMOX1,JUN,NOS3,VEGFA
7 Member	GO Biological Processes	GO:0001938	positive regulation of endothelial cell proliferation	-5.85568	shared	6	AKT1,F3,MTOR,HMOX1,JUN,VEGFA
7 Member	GO Biological Processes	GO:0045766	positive regulation of angiogenesis	-5.4599	shared	7	F3,HMOX1,ITGB2,NOS3,SERPINE1,PTGIS,VEGFA
7 Member	GO Biological Processes	GO:0001568	blood vessel development	-13.8889	shared	21	AGT,AKT1,EGF,F3,HMOX1,IL6,ITGB2,JUN,MMP2,NOS3,SERPINE1,PIK3CA,PIK3CB,PIK3CG,PPARG,MAPK1,PTEN,PTGIS,CCL2,VEGFA,XDH
7 Member	GO Biological Processes	GO:0001667	ameboidal-type cell migration	-8.67849	shared	13	AGT,AKT1,DPP4,MTOR,HMOX1,ITGB2,JUN,NOS3,PIK3CA,PPARG,PTEN,PTPN11,VEGFA
7 Member	GO Biological Processes	GO:0010595	positive regulation of endothelial cell migration	-4.33774	shared	5	AGT,AKT1,HMOX1,NOS3,VEGFA
8 Summary	cellular response to lipid
8 Member	GO Biological Processes	GO:0071396	cellular response to lipid	-13.4814	shared	19	AKT1,CDK4,CREB1,ESR1,ESR2,IL6,NOS3,SERPINE1,PPARA,PPARG,MAPK1,MAPK3,MAPK8,RXRA,RXRB,RXRG,CCL2,TLR4,TNF
8 Member	GO Biological Processes	GO:0032870	cellular response to hormone stimulus	-12.2017	shared	19	AGT,AKT1,CDK4,CREB1,ESR1,ESR2,FOS,INS,INSR,JUN,PIK3CA,PPARA,PPARG,PTEN,PTPN11,REN,RXRA,RXRB,RXRG
8 Member	GO Biological Processes	GO:0006352	DNA-templated transcription, initiation	-10.5295	shared	12	CDK4,CREB1,ESR1,ESR2,JUN,PPARA,PPARG,MAPK3,RXRA,RXRB,RXRG,TP53
8 Member	GO Biological Processes	GO:0071407	cellular response to organic cyclic compound	-10.3476	shared	16	AKT1,CASP3,CDK4,ESR1,ESR2,PIK3CG,PPARA,PPARG,MAPK1,MAPK3,RXRA,RXRB,RXRG,CCL2,SOD1,TNF
8 Member	GO Biological Processes	GO:0006367	transcription initiation from RNA polymerase II promoter	-9.20308	shared	10	CDK4,CREB1,ESR1,ESR2,PPARA,PPARG,RXRA,RXRB,RXRG,TP53
8 Member	GO Biological Processes	GO:0030522	intracellular receptor signaling pathway	-7.52834	shared	10	BIRC2,BIRC3,ESR1,ESR2,PPARA,PPARG,PTGIS,RXRA,RXRB,RXRG
8 Member	GO Biological Processes	GO:0009755	hormone-mediated signaling pathway	-7.0639	shared	9	ESR1,ESR2,PPARA,PPARG,PTPN11,REN,RXRA,RXRB,RXRG
8 Member	GO Biological Processes	GO:0043401	steroid hormone mediated signaling pathway	-5.48378	potential targets	7	ESR1,ESR2,PPARA,PPARG,RXRA,RXRB,RXRG
8 Member	GO Biological Processes	GO:0071383	cellular response to steroid hormone stimulus	-4.64103	potential targets	7	ESR1,ESR2,PPARA,PPARG,RXRA,RXRB,RXRG
9 Summary	regulation of MAP kinase activity
9 Member	GO Biological Processes	GO:0043405	regulation of MAP kinase activity	-12.6253	shared	15	EGF,HMGCR,HRAS,IGF1,INSR,KRAS,PIK3CB,PIK3CG,MAPK1,MAPK3,PTPN11,SOD1,TLR4,TNF,VEGFA
9 Member	GO Biological Processes	GO:0070371	ERK1 and ERK2 cascade	-11.5068	shared	14	AGT,EGF,HMGCR,HRAS,IGF1,INSR,JUN,MAPK1,MAPK3,PTEN,PTPN11,CCL2,TLR4,TNF
9 Member	GO Biological Processes	GO:0000187	activation of MAPK activity	-10.3032	shared	10	EGF,IGF1,INSR,PIK3CB,MAPK1,MAPK3,PTPN11,SOD1,TLR4,TNF
9 Member	GO Biological Processes	GO:0070372	regulation of ERK1 and ERK2 cascade	-7.14295	shared	10	HMGCR,HRAS,INSR,JUN,MAPK3,PTEN,PTPN11,CCL2,TLR4,TNF
9 Member	GO Biological Processes	GO:0070374	positive regulation of ERK1 and ERK2 cascade	-7.12012	shared	9	HMGCR,HRAS,INSR,JUN,MAPK3,PTEN,PTPN11,CCL2,TNF
9 Member	GO Biological Processes	GO:0043406	positive regulation of MAP kinase activity	-12.9148	shared	14	EGF,HRAS,IGF1,INSR,KRAS,PIK3CB,PIK3CG,MAPK1,MAPK3,PTPN11,SOD1,TLR4,TNF,VEGFA
9 Member	GO Biological Processes	GO:0010638	positive regulation of organelle organization	-7.38677	candidate targets	13	BCL2,EGF,MTOR,HRAS,IGF1,INS,INSR,MAPK1,MAPK3,MAPK8,TNF,TP53,VEGFA
9 Member	GO Biological Processes	GO:0060341	regulation of cellular localization	-13.4514	shared	21	ADORA2A,AKT1,BCL2,CALM1,CALM2,CALM3,EGF,F2,HMGCR,HMOX1,HRAS,IGF1,INS,ITGB2,MAPK1,MAPK3,MAPK8,PTEN,PTPN11,TNF,TP53
9 Member	GO Biological Processes	GO:0032147	activation of protein kinase activity	-14.4068	shared	16	AGT,AKT1,EGF,MTOR,IGF1,INS,INSR,PIK3CA,PIK3CB,MAPK1,MAPK3,PTPN11,SOD1,TLR4,TNF,VEGFA
9 Member	GO Biological Processes	GO:0043408	regulation of MAPK cascade	-15.9545	shared	23	AKT1,EGF,HMGCR,HRAS,IGF1,IL6,INS,INSR,JUN,KRAS,PIK3CB,PIK3CG,MAPK1,MAPK3,PTEN,PTPN11,REN,CCL2,SOD1,TLR4,TNF,VEGFA,XDH
9 Member	GO Biological Processes	GO:0043410	positive regulation of MAPK cascade	-16.5418	shared	21	EGF,HMGCR,HRAS,IGF1,IL6,INS,INSR,JUN,KRAS,PIK3CB,PIK3CG,MAPK1,MAPK3,PTEN,PTPN11,CCL2,SOD1,TLR4,TNF,VEGFA,XDH
9 Member	GO Biological Processes	GO:0071902	positive regulation of protein serine/threonine kinase activity	-16.5954	shared	18	AKT1,CALM1,CALM2,CALM3,EGF,HRAS,IGF1,INSR,KRAS,PIK3CB,PIK3CG,MAPK1,MAPK3,PTPN11,SOD1,TLR4,TNF,VEGFA
9 Member	GO Biological Processes	GO:0040017	positive regulation of locomotion	-18.0403	shared	22	AGT,AKT1,BCL2,EGF,F3,F7,MTOR,HMOX1,HRAS,IGF1,IL6,INS,INSR,JUN,NOS3,SERPINE1,MAPK1,MAPK3,SELP,SOD2,TNF,VEGFA
9 Member	GO Biological Processes	GO:0051272	positive regulation of cellular component movement	-18.3178	shared	22	AGT,AKT1,BCL2,EGF,F3,F7,MTOR,HMOX1,HRAS,IGF1,IL6,INS,INSR,JUN,NOS3,SERPINE1,MAPK1,MAPK3,SELP,SOD2,TNF,VEGFA
9 Member	GO Biological Processes	GO:0071900	regulation of protein serine/threonine kinase activity	-18.5139	shared	22	AKT1,CALM1,CALM2,CALM3,CASP3,CDK4,EGF,HMGCR,HRAS,IGF1,INSR,KRAS,PIK3CB,PIK3CG,MAPK1,MAPK3,PTEN,PTPN11,SOD1,TLR4,TNF,VEGFA
9 Member	GO Biological Processes	GO:2000147	positive regulation of cell motility	-18.5863	shared	22	AGT,AKT1,BCL2,EGF,F3,F7,MTOR,HMOX1,HRAS,IGF1,IL6,INS,INSR,JUN,NOS3,SERPINE1,MAPK1,MAPK3,SELP,SOD2,TNF,VEGFA
9 Member	GO Biological Processes	GO:0030335	positive regulation of cell migration	-18.92	shared	22	AGT,AKT1,BCL2,EGF,F3,F7,MTOR,HMOX1,HRAS,IGF1,IL6,INS,INSR,JUN,NOS3,SERPINE1,MAPK1,MAPK3,SELP,SOD2,TNF,VEGFA
9 Member	GO Biological Processes	GO:0045860	positive regulation of protein kinase activity	-19.7119	shared	23	AGT,AKT1,CALM1,CALM2,CALM3,ACE,EGF,MTOR,HRAS,IGF1,INS,INSR,KRAS,PIK3CA,PIK3CB,PIK3CG,MAPK1,MAPK3,PTPN11,SOD1,TLR4,TNF,VEGFA
9 Member	GO Biological Processes	GO:0033674	positive regulation of kinase activity	-19.8334	shared	24	AGT,AKT1,CALM1,CALM2,CALM3,ACE,EGF,F2,MTOR,HRAS,IGF1,INS,INSR,KRAS,PIK3CA,PIK3CB,PIK3CG,MAPK1,MAPK3,PTPN11,SOD1,TLR4,TNF,VEGFA
9 Member	GO Biological Processes	GO:0051347	positive regulation of transferase activity	-19.9043	shared	25	AGT,AKT1,CALM1,CALM2,CALM3,ACE,EGF,F2,MTOR,HRAS,IGF1,INS,INSR,KRAS,PIK3CA,PIK3CB,PIK3CG,MAPK1,MAPK3,PTEN,PTPN11,SOD1,TLR4,TNF,VEGFA
9 Member	GO Biological Processes	GO:0045859	regulation of protein kinase activity	-21.8269	shared	28	ADORA2A,AGT,AKT1,CALM1,CALM2,CALM3,CASP3,CDK4,ACE,EGF,MTOR,HMGCR,HRAS,IGF1,INS,INSR,KRAS,PIK3CA,PIK3CB,PIK3CG,MAPK1,MAPK3,PTEN,PTPN11,SOD1,TLR4,TNF,VEGFA
10 Summary	regulation of lipid metabolic process
10 Member	GO Biological Processes	GO:0019216	regulation of lipid metabolic process	-12.2556	shared	15	AGT,AKT1,CDK4,CREB1,F2,FASN,MTOR,HMGCR,INS,PIK3CG,PPARA,PPARG,RXRA,SOD1,TNF
10 Member	GO Biological Processes	GO:1902883	negative regulation of response to oxidative stress	-3.09666	candidate targets	3	AKT1,INS,SOD2
10 Member	GO Biological Processes	GO:1903202	negative regulation of oxidative stress-induced cell death	-3.14207	candidate targets	3	AKT1,INS,SOD2
10 Member	GO Biological Processes	GO:1900408	negative regulation of cellular response to oxidative stress	-3.14207	candidate targets	3	AKT1,INS,SOD2
10 Member	GO Biological Processes	GO:2001243	negative regulation of intrinsic apoptotic signaling pathway	-3.59912	candidate targets	4	AKT1,BCL2,INS,SOD2
10 Member	GO Biological Processes	GO:0062014	negative regulation of small molecule metabolic process	-3.70684	candidate targets	4	AKT1,INS,PPARA,SOD1
10 Member	GO Biological Processes	GO:0045600	positive regulation of fat cell differentiation	-4.33856	candidate targets	4	AKT1,CREB1,INS,PPARG
10 Member	GO Biological Processes	GO:1902176	negative regulation of oxidative stress-induced intrinsic apoptotic signaling pathway	-4.46934	candidate targets	3	AKT1,INS,SOD2
10 Member	GO Biological Processes	GO:0051000	positive regulation of nitric-oxide synthase activity	-4.46934	candidate targets	3	AKT1,INS,KRAS
10 Member	GO Biological Processes	GO:0050994	regulation of lipid catabolic process	-9.65463	shared	7	AKT1,CDK4,MTOR,INS,PIK3CG,PPARA,TNF
10 Member	GO Biological Processes	GO:0045833	negative regulation of lipid metabolic process	-5.16656	shared	5	AKT1,INS,PIK3CG,SOD1,TNF
10 Member	GO Biological Processes	GO:0045444	fat cell differentiation	-5.30676	shared	7	AKT1,CREB1,MTOR,IL6,INS,PPARG,TNF
10 Member	GO Biological Processes	GO:1903201	regulation of oxidative stress-induced cell death	-5.35538	shared	5	AKT1,INS,SOD1,SOD2,TLR4
10 Member	GO Biological Processes	GO:1902175	regulation of oxidative stress-induced intrinsic apoptotic signaling pathway	-5.55486	candidate targets	4	AKT1,INS,SOD1,SOD2
10 Member	GO Biological Processes	GO:0046889	positive regulation of lipid biosynthetic process	-5.56374	candidate targets	5	AKT1,CREB1,MTOR,INS,TNF
10 Member	GO Biological Processes	GO:2001242	regulation of intrinsic apoptotic signaling pathway	-4.85367	candidate targets	6	AKT1,BCL2,INS,SOD1,SOD2,TP53
10 Member	GO Biological Processes	GO:0031330	negative regulation of cellular catabolic process	-6.03066	candidate targets	8	AKT1,BCL2,MTOR,HMOX1,INS,PIK3CA,PIK3CG,PPARA
10 Member	GO Biological Processes	GO:0032770	positive regulation of monooxygenase activity	-5.80423	candidate targets	4	AKT1,INS,KRAS,TNF
10 Member	GO Biological Processes	GO:0051341	regulation of oxidoreductase activity	-7.69225	shared	7	AGT,AKT1,CALM1,INS,KRAS,NOS3,TNF
10 Member	GO Biological Processes	GO:0032768	regulation of monooxygenase activity	-7.52265	shared	6	AKT1,CALM1,INS,KRAS,NOS3,TNF
10 Member	GO Biological Processes	GO:0045598	regulation of fat cell differentiation	-6.88276	shared	7	AKT1,CREB1,MTOR,IL6,INS,PPARG,TNF
10 Member	GO Biological Processes	GO:0009895	negative regulation of catabolic process	-6.59588	candidate targets	9	AKT1,BCL2,MTOR,HMOX1,INS,PIK3CA,PIK3CG,PPARA,TNF
10 Member	GO Biological Processes	GO:1900407	regulation of cellular response to oxidative stress	-6.4881	shared	6	AKT1,INS,SOD1,SOD2,TLR4,TNF
10 Member	GO Biological Processes	GO:0046890	regulation of lipid biosynthetic process	-8.38285	shared	9	AKT1,CDK4,CREB1,FASN,MTOR,HMGCR,INS,SOD1,TNF
10 Member	GO Biological Processes	GO:0050999	regulation of nitric-oxide synthase activity	-6.40502	candidate targets	5	AKT1,CALM1,INS,KRAS,NOS3
10 Member	GO Biological Processes	GO:0008631	intrinsic apoptotic signaling pathway in response to oxidative stress	-6.40502	candidate targets	5	AKT1,BCL2,INS,SOD1,SOD2
10 Member	GO Biological Processes	GO:0016042	lipid catabolic process	-6.06404	shared	9	AKT1,CDK4,CYP3A4,MTOR,INS,LPL,PIK3CG,PPARA,TNF
10 Member	GO Biological Processes	GO:0050995	negative regulation of lipid catabolic process	-6.17906	candidate targets	4	AKT1,INS,PIK3CG,TNF
10 Member	GO Biological Processes	GO:0045834	positive regulation of lipid metabolic process	-9.48371	shared	9	AGT,AKT1,CREB1,F2,MTOR,INS,PPARA,PPARG,TNF
10 Member	GO Biological Processes	GO:0036473	cell death in response to oxidative stress	-6.23107	shared	6	AKT1,BCL2,INS,SOD1,SOD2,TLR4
10 Member	GO Biological Processes	GO:0051353	positive regulation of oxidoreductase activity	-6.31265	candidate targets	5	AGT,AKT1,INS,KRAS,TNF
10 Member	GO Biological Processes	GO:1902882	regulation of response to oxidative stress	-6.20413	shared	6	AKT1,INS,SOD1,SOD2,TLR4,TNF
11 Summary	regulation of lipid localization
11 Member	GO Biological Processes	GO:1905952	regulation of lipid localization	-12.0815	shared	11	AGT,AKT1,EGF,IL6,LPL,PON1,PPARA,PPARG,PTPN11,REN,TNF
11 Member	GO Biological Processes	GO:0010876	lipid localization	-10.8279	shared	14	AGT,AKT1,ACE,EGF,IL6,LPL,PON1,PPARA,PPARG,PTPN11,REN,RXRA,SOAT1,TNF
11 Member	GO Biological Processes	GO:0032368	regulation of lipid transport	-8.61532	candidate targets	8	AGT,AKT1,EGF,PON1,PPARA,PPARG,PTPN11,REN
11 Member	GO Biological Processes	GO:0015850	organic hydroxy compound transport	-7.245	shared	9	ADORA2A,AGT,EGF,PON1,PPARG,PTPN11,REN,RXRA,SOAT1
11 Member	GO Biological Processes	GO:0015849	organic acid transport	-4.2316	shared	7	ADORA2A,AGT,AKT1,ACE,PPARA,PPARG,RXRA
11 Member	GO Biological Processes	GO:0046942	carboxylic acid transport	-4.2316	shared	7	ADORA2A,AGT,AKT1,ACE,PPARA,PPARG,RXRA
11 Member	GO Biological Processes	GO:0015718	monocarboxylic acid transport	-3.86241	shared	5	AKT1,ACE,PPARA,PPARG,RXRA
11 Member	GO Biological Processes	GO:0015908	fatty acid transport	-3.68836	candidate targets	4	AKT1,ACE,PPARA,PPARG
11 Member	GO Biological Processes	GO:0006820	anion transport	-3.23643	candidate targets	8	ADORA2A,AGT,AKT1,ACE,MTOR,PPARA,PPARG,RXRA
11 Member	GO Biological Processes	GO:0015711	organic anion transport	-3.21421	shared	7	ADORA2A,AGT,AKT1,ACE,PPARA,PPARG,RXRA
11 Member	GO Biological Processes	GO:0015909	long-chain fatty acid transport	-2.96996	candidate targets	3	AKT1,ACE,PPARG
11 Member	GO Biological Processes	GO:0006869	lipid transport	-7.89877	shared	11	AGT,AKT1,ACE,EGF,PON1,PPARA,PPARG,PTPN11,REN,RXRA,SOAT1
12 Summary	leukocyte migration
12 Member	GO Biological Processes	GO:0050900	leukocyte migration	-11.8306	shared	16	F7,HMOX1,IL6,ITGB2,SERPINE1,PIK3CA,PIK3CB,PIK3CG,MAPK3,PTPN11,CCL2,SELE,SELP,TNF,VCAM1,VEGFA
12 Member	GO Biological Processes	GO:0006935	chemotaxis	-10.2615	shared	16	CREB1,F3,F7,HRAS,IL6,ITGB2,SERPINE1,PIK3CA,PIK3CB,PIK3CG,MAPK1,MAPK3,PTPN11,CCL2,VCAM1,VEGFA
12 Member	GO Biological Processes	GO:0042330	taxis	-10.2509	shared	16	CREB1,F3,F7,HRAS,IL6,ITGB2,SERPINE1,PIK3CA,PIK3CB,PIK3CG,MAPK1,MAPK3,PTPN11,CCL2,VCAM1,VEGFA
12 Member	GO Biological Processes	GO:0071621	granulocyte chemotaxis	-3.27232	candidate targets	4	ITGB2,PIK3CG,MAPK3,CCL2
12 Member	GO Biological Processes	GO:0008360	regulation of cell shape	-2.80737	potential targets	4	F2,ITGB2,CCL2,VEGFA
12 Member	GO Biological Processes	GO:0097530	granulocyte migration	-3.06354	candidate targets	4	ITGB2,PIK3CG,MAPK3,CCL2
12 Member	GO Biological Processes	GO:0071347	cellular response to interleukin-1	-3.11306	potential targets	4	IL6,MAPK3,PTGIS,CCL2
12 Member	GO Biological Processes	GO:0070555	response to interleukin-1	-3.91566	potential targets	5	IL6,MAPK3,PTGIS,CCL2,SELE
12 Member	GO Biological Processes	GO:0002690	positive regulation of leukocyte chemotaxis	-5.27227	potential targets	5	F7,IL6,SERPINE1,MAPK3,VEGFA
12 Member	GO Biological Processes	GO:0050921	positive regulation of chemotaxis	-5.55184	potential targets	6	F3,F7,IL6,SERPINE1,MAPK3,VEGFA
12 Member	GO Biological Processes	GO:0050920	regulation of chemotaxis	-5.4456	shared	7	F3,F7,IL6,SERPINE1,MAPK3,CCL2,VEGFA
12 Member	GO Biological Processes	GO:0002688	regulation of leukocyte chemotaxis	-6.02356	shared	6	F7,IL6,SERPINE1,MAPK3,CCL2,VEGFA
12 Member	GO Biological Processes	GO:0030595	leukocyte chemotaxis	-6.43972	shared	8	F7,IL6,ITGB2,SERPINE1,PIK3CG,MAPK3,CCL2,VEGFA
12 Member	GO Biological Processes	GO:0060326	cell chemotaxis	-6.49257	shared	9	F7,IL6,ITGB2,SERPINE1,PIK3CG,MAPK3,CCL2,VCAM1,VEGFA
12 Member	GO Biological Processes	GO:0002687	positive regulation of leukocyte migration	-7.08379	shared	7	F7,IL6,SERPINE1,MAPK3,SELP,TNF,VEGFA
12 Member	GO Biological Processes	GO:0002685	regulation of leukocyte migration	-8.47211	shared	9	F7,HMOX1,IL6,SERPINE1,MAPK3,CCL2,SELP,TNF,VEGFA
12 Member	GO Biological Processes	GO:0097529	myeloid leukocyte migration	-5.56223	shared	7	IL6,ITGB2,SERPINE1,PIK3CG,MAPK3,CCL2,VEGFA
13 Summary	cellular response to reactive oxygen species
13 Member	GO Biological Processes	GO:0034614	cellular response to reactive oxygen species	-11.3887	shared	11	AKT1,FOS,IL6,JUN,NOS3,MAPK1,MAPK3,MAPK8,SOD1,SOD2,TNF
13 Member	GO Biological Processes	GO:0046686	response to cadmium ion	-12.3789	shared	9	AKT1,CAT,FOS,HMOX1,JUN,MAPK1,MAPK3,MAPK8,SOD1
13 Member	GO Biological Processes	GO:0071276	cellular response to cadmium ion	-12.5923	candidate targets	8	AKT1,FOS,HMOX1,JUN,MAPK1,MAPK3,MAPK8,SOD1
13 Member	GO Biological Processes	GO:0071496	cellular response to external stimulus	-13.2379	shared	15	AGT,AKT1,BCL2,FOS,MTOR,HMOX1,JUN,PPARG,MAPK1,MAPK3,MAPK8,PTPN11,SOD1,TLR4,TP53
13 Member	GO Biological Processes	GO:0009266	response to temperature stimulus	-10.2624	shared	11	AKT1,FOS,MTOR,HMOX1,IGF1,LPL,NOS3,PPARG,MAPK1,MAPK3,SOD1
13 Member	GO Biological Processes	GO:0006979	response to oxidative stress	-17.2261	shared	20	AKT1,BCL2,CASP3,CAT,FOS,HMOX1,IL6,INS,JUN,NOS3,MAPK1,MAPK3,MAPK8,SOD1,SOD2,TLR4,TNF,TP53,TPO,CYCS
13 Member	GO Biological Processes	GO:0034599	cellular response to oxidative stress	-18.0214	shared	18	AKT1,BCL2,CAT,FOS,HMOX1,IL6,INS,JUN,NOS3,MAPK1,MAPK3,MAPK8,SOD1,SOD2,TLR4,TNF,TP53,CYCS
13 Member	GO Biological Processes	GO:0031668	cellular response to extracellular stimulus	-9.49892	candidate targets	11	BCL2,FOS,MTOR,HMOX1,JUN,PPARG,MAPK1,MAPK3,MAPK8,SOD1,TP53
13 Member	GO Biological Processes	GO:0000302	response to reactive oxygen species	-15.2615	shared	15	AKT1,BCL2,CASP3,CAT,FOS,HMOX1,IL6,JUN,NOS3,MAPK1,MAPK3,MAPK8,SOD1,SOD2,TNF
13 Member	GO Biological Processes	GO:0071248	cellular response to metal ion	-9.59778	candidate targets	10	AKT1,CREB1,FOS,HMOX1,JUN,SERPINE1,MAPK1,MAPK3,MAPK8,SOD1
13 Member	GO Biological Processes	GO:0071241	cellular response to inorganic substance	-9.08214	candidate targets	10	AKT1,CREB1,FOS,HMOX1,JUN,SERPINE1,MAPK1,MAPK3,MAPK8,SOD1
13 Member	GO Biological Processes	GO:0032091	negative regulation of protein binding	-3.48225	candidate targets	4	AKT1,PPARA,MAPK3,MAPK8
13 Member	GO Biological Processes	GO:0031669	cellular response to nutrient levels	-8.79848	shared	10	BCL2,MTOR,HMOX1,JUN,PPARG,MAPK1,MAPK3,MAPK8,SOD1,TP53
13 Member	GO Biological Processes	GO:0009408	response to heat	-7.79281	shared	8	AKT1,MTOR,HMOX1,IGF1,NOS3,MAPK1,MAPK3,SOD1
13 Member	GO Biological Processes	GO:0051098	regulation of binding	-7.77196	candidate targets	11	AKT1,BCL2,EGF,HMOX1,IGF1,JUN,PON1,PPARA,PPARG,MAPK3,MAPK8
13 Member	GO Biological Processes	GO:0051101	regulation of DNA binding	-7.03216	candidate targets	7	EGF,HMOX1,IGF1,JUN,PPARA,PPARG,MAPK8
13 Member	GO Biological Processes	GO:0042594	response to starvation	-6.93097	candidate targets	8	BCL2,MTOR,JUN,PPARG,MAPK1,MAPK3,MAPK8,TP53
13 Member	GO Biological Processes	GO:0009267	cellular response to starvation	-6.4154	candidate targets	7	BCL2,MTOR,JUN,MAPK1,MAPK3,MAPK8,TP53
13 Member	GO Biological Processes	GO:0051100	negative regulation of binding	-4.86877	candidate targets	6	AKT1,HMOX1,JUN,PPARA,MAPK3,MAPK8
13 Member	GO Biological Processes	GO:0031281	positive regulation of cyclase activity	-4.34071	candidate targets	3	NOS3,MAPK3,MAPK8
13 Member	GO Biological Processes	GO:0043393	regulation of protein binding	-3.22637	candidate targets	5	AKT1,BCL2,PPARA,MAPK3,MAPK8
13 Member	GO Biological Processes	GO:0031279	regulation of cyclase activity	-3.14207	candidate targets	3	NOS3,MAPK3,MAPK8
13 Member	GO Biological Processes	GO:0007276	gamete generation	-2.88146	candidate targets	8	AKT1,BIRC3,BCL2,ACE,MTOR,IGF1,NOS3,SOD1
14 Summary	cell-cell adhesion
14 Member	GO Biological Processes	GO:0098609	cell-cell adhesion	-11.3525	shared	19	ADORA2A,AKT1,BCL2,CASP3,DPP4,IGF1,IL6,ITGB2,PIK3CA,PIK3CB,PIK3CG,PLG,PPARA,PTPN11,CCL2,SELE,SELP,TNF,VCAM1
14 Member	GO Biological Processes	GO:0042129	regulation of T cell proliferation	-2.83833	candidate targets	4	CASP3,IGF1,IL6,VCAM1
14 Member	GO Biological Processes	GO:0070665	positive regulation of leukocyte proliferation	-2.96925	candidate targets	4	BCL2,IGF1,IL6,VCAM1
14 Member	GO Biological Processes	GO:0032946	positive regulation of mononuclear cell proliferation	-3.02747	candidate targets	4	BCL2,IGF1,IL6,VCAM1
14 Member	GO Biological Processes	GO:0050671	positive regulation of lymphocyte proliferation	-3.0394	candidate targets	4	BCL2,IGF1,IL6,VCAM1
14 Member	GO Biological Processes	GO:0070663	regulation of leukocyte proliferation	-3.19891	candidate targets	5	BCL2,CASP3,IGF1,IL6,VCAM1
14 Member	GO Biological Processes	GO:0032944	regulation of mononuclear cell proliferation	-3.28261	candidate targets	5	BCL2,CASP3,IGF1,IL6,VCAM1
14 Member	GO Biological Processes	GO:0030155	regulation of cell adhesion	-12.7285	shared	19	ADORA2A,AKT1,BCL2,CASP3,DPP4,IGF1,IL6,SERPINE1,PIK3CA,PIK3CB,PIK3CG,PLG,PPARA,PTEN,PTPN11,CCL2,TNF,VCAM1,VEGFA
14 Member	GO Biological Processes	GO:0042098	T cell proliferation	-3.57163	candidate targets	5	CASP3,IGF1,IL6,PIK3CG,VCAM1
14 Member	GO Biological Processes	GO:0046651	lymphocyte proliferation	-3.68872	candidate targets	6	BCL2,CASP3,IGF1,IL6,PIK3CG,VCAM1
14 Member	GO Biological Processes	GO:0070661	leukocyte proliferation	-4.48191	candidate targets	7	BCL2,CASP3,ACE,IGF1,IL6,PIK3CG,VCAM1
14 Member	GO Biological Processes	GO:0031294	lymphocyte costimulation	-4.5309	candidate targets	4	AKT1,DPP4,PIK3CA,PTPN11
14 Member	GO Biological Processes	GO:0031295	T cell costimulation	-4.56325	candidate targets	4	AKT1,DPP4,PIK3CA,PTPN11
14 Member	GO Biological Processes	GO:0032943	mononuclear cell proliferation	-4.63288	candidate targets	7	BCL2,CASP3,ACE,IGF1,IL6,PIK3CG,VCAM1
14 Member	GO Biological Processes	GO:0051251	positive regulation of lymphocyte activation	-5.86578	shared	9	AKT1,BCL2,DPP4,IGF1,IL6,PIK3CA,PTPN11,CCL2,VCAM1
14 Member	GO Biological Processes	GO:0050670	regulation of lymphocyte proliferation	-3.29216	candidate targets	5	BCL2,CASP3,IGF1,IL6,VCAM1
14 Member	GO Biological Processes	GO:0007159	leukocyte cell-cell adhesion	-12.897	shared	15	ADORA2A,AKT1,CASP3,DPP4,IGF1,IL6,ITGB2,PIK3CA,PPARA,PTPN11,CCL2,SELE,SELP,TNF,VCAM1
14 Member	GO Biological Processes	GO:0045785	positive regulation of cell adhesion	-6.29223	shared	10	AKT1,DPP4,IGF1,IL6,PIK3CA,PTPN11,CCL2,TNF,VCAM1,VEGFA
14 Member	GO Biological Processes	GO:0050865	regulation of cell activation	-13.6151	shared	19	ADORA2A,AKT1,BCL2,CASP3,DPP4,F2,HMOX1,IGF1,IL6,ITGB2,NOS3,PIK3CA,PTPN11,CCL2,SELP,SOD1,THBD,TLR4,VCAM1
14 Member	GO Biological Processes	GO:0042110	T cell activation	-9.73524	shared	14	ADORA2A,AKT1,BCL2,CASP3,DPP4,IGF1,IL6,INS,PIK3CA,PIK3CG,PTPN11,CCL2,SOD1,VCAM1
14 Member	GO Biological Processes	GO:0002694	regulation of leukocyte activation	-9.70664	shared	15	ADORA2A,AKT1,BCL2,CASP3,DPP4,HMOX1,IGF1,IL6,ITGB2,PIK3CA,PTPN11,CCL2,SOD1,TLR4,VCAM1
14 Member	GO Biological Processes	GO:0022407	regulation of cell-cell adhesion	-9.54883	shared	13	ADORA2A,AKT1,CASP3,DPP4,IGF1,IL6,PIK3CA,PLG,PPARA,PTPN11,CCL2,TNF,VCAM1
14 Member	GO Biological Processes	GO:0050867	positive regulation of cell activation	-8.40607	shared	12	AKT1,BCL2,DPP4,IGF1,IL6,ITGB2,PIK3CA,PTPN11,CCL2,SELP,TLR4,VCAM1
14 Member	GO Biological Processes	GO:1903037	regulation of leukocyte cell-cell adhesion	-9.78117	shared	12	ADORA2A,AKT1,CASP3,DPP4,IGF1,IL6,PIK3CA,PPARA,PTPN11,CCL2,TNF,VCAM1
14 Member	GO Biological Processes	GO:0046649	lymphocyte activation	-8.11301	shared	15	ADORA2A,AKT1,BCL2,CASP3,DPP4,IGF1,IL6,INS,ITGB2,PIK3CA,PIK3CG,PTPN11,CCL2,SOD1,VCAM1
14 Member	GO Biological Processes	GO:1903039	positive regulation of leukocyte cell-cell adhesion	-7.52818	shared	9	AKT1,DPP4,IGF1,IL6,PIK3CA,PTPN11,CCL2,TNF,VCAM1
14 Member	GO Biological Processes	GO:0002696	positive regulation of leukocyte activation	-7.4884	shared	11	AKT1,BCL2,DPP4,IGF1,IL6,ITGB2,PIK3CA,PTPN11,CCL2,TLR4,VCAM1
14 Member	GO Biological Processes	GO:0051249	regulation of lymphocyte activation	-7.41969	shared	12	ADORA2A,AKT1,BCL2,CASP3,DPP4,IGF1,IL6,PIK3CA,PTPN11,CCL2,SOD1,VCAM1
14 Member	GO Biological Processes	GO:0022409	positive regulation of cell-cell adhesion	-6.95708	shared	9	AKT1,DPP4,IGF1,IL6,PIK3CA,PTPN11,CCL2,TNF,VCAM1
14 Member	GO Biological Processes	GO:0050863	regulation of T cell activation	-8.38213	shared	11	ADORA2A,AKT1,CASP3,DPP4,IGF1,IL6,PIK3CA,PTPN11,CCL2,SOD1,VCAM1
14 Member	GO Biological Processes	GO:0050870	positive regulation of T cell activation	-6.52599	shared	8	AKT1,DPP4,IGF1,IL6,PIK3CA,PTPN11,CCL2,VCAM1
15 Summary	response to purine-containing compound
15 Member	GO Biological Processes	GO:0014074	response to purine-containing compound	-10.4486	shared	10	ADORA2A,BIRC2,FOS,JUN,PIK3CG,PPARG,PTEN,REN,SOD1,THBD
15 Member	GO Biological Processes	GO:0035902	response to immobilization stress	-4.16948	candidate targets	3	FOS,PPARG,REN
15 Member	GO Biological Processes	GO:0051591	response to cAMP	-6.12507	candidate targets	6	BIRC2,FOS,JUN,PIK3CG,REN,THBD
15 Member	GO Biological Processes	GO:0046683	response to organophosphorus	-7.99235	candidate targets	8	BIRC2,FOS,JUN,PIK3CG,PTEN,REN,SOD1,THBD
16 Summary	cellular extravasation
16 Member	GO Biological Processes	GO:0045123	cellular extravasation	-9.46949	shared	7	ITGB2,PIK3CG,CCL2,SELE,SELP,TNF,VCAM1
16 Member	GO Biological Processes	GO:0019722	calcium-mediated signaling	-7.59624	shared	9	CALM1,CALM2,CALM3,MTOR,IGF1,SELE,SELP,TNF,VCAM1
16 Member	GO Biological Processes	GO:0050901	leukocyte tethering or rolling	-6.019	potential targets	4	SELE,SELP,TNF,VCAM1
16 Member	GO Biological Processes	GO:0007157	heterophilic cell-cell adhesion via plasma membrane cell adhesion molecules	-3.37077	potential targets	3	SELE,SELP,VCAM1
16 Member	GO Biological Processes	GO:0098742	cell-cell adhesion via plasma-membrane adhesion molecules	-2.96174	potential targets	5	ITGB2,PIK3CB,SELE,SELP,VCAM1
16 Member	GO Biological Processes	GO:0019932	second-messenger-mediated signaling	-9.49365	shared	13	ADORA2A,AGT,CALM1,CALM2,CALM3,MTOR,IGF1,INS,NOS3,SELE,SELP,TNF,VCAM1
16 Member	GO Biological Processes	GO:0061756	leukocyte adhesion to vascular endothelial cell	-5.28777	potential targets	4	SELE,SELP,TNF,VCAM1
17 Summary	response to growth factor
17 Member	GO Biological Processes	GO:0070848	response to growth factor	-9.09833	shared	16	AGT,AKT1,CASP3,CAT,CREB1,FOS,INSR,JUN,MAPK1,MAPK3,PTEN,PTPN11,CCL2,VCAM1,VEGFA,XDH
17 Member	GO Biological Processes	GO:0071363	cellular response to growth factor stimulus	-9.35597	shared	16	AGT,AKT1,CASP3,CAT,CREB1,FOS,INSR,JUN,MAPK1,MAPK3,PTEN,PTPN11,CCL2,VCAM1,VEGFA,XDH
17 Member	GO Biological Processes	GO:0007507	heart development	-10.6933	shared	16	AGT,CASP3,CREB1,MTOR,IGF1,INSR,JUN,NOS3,PPARA,PPARG,MAPK1,MAPK3,PTEN,PTPN11,RXRA,VEGFA
17 Member	GO Biological Processes	GO:0044419	interspecies interaction between organisms	-6.56477	shared	14	BCL2,CREB1,DPP4,F2,INSR,JUN,PLG,MAPK1,MAPK3,RXRA,CCL2,TNF,TP53,VCAM1
17 Member	GO Biological Processes	GO:0016032	viral process	-5.62876	shared	12	BCL2,CREB1,DPP4,INSR,JUN,MAPK1,MAPK3,RXRA,CCL2,TNF,TP53,VCAM1
17 Member	GO Biological Processes	GO:0044403	symbiont process	-6.89157	shared	14	BCL2,CREB1,DPP4,F2,INSR,JUN,PLG,MAPK1,MAPK3,RXRA,CCL2,TNF,TP53,VCAM1
18 Summary	developmental growth
18 Member	GO Biological Processes	GO:0048589	developmental growth	-8.97765	shared	15	AGT,AKT1,BCL2,CDK4,CREB1,ESR1,MTOR,IGF1,INSR,PIK3CA,PTEN,PTPN11,RXRA,SOD1,VEGFA
18 Member	GO Biological Processes	GO:0040008	regulation of growth	-12.3465	shared	19	AGT,AKT1,BCL2,CDK4,CREB1,ESR2,F2,MTOR,IGF1,INS,INSR,PIK3CA,PPARG,PTEN,PTPN11,SOD1,TNF,TP53,VEGFA
18 Member	GO Biological Processes	GO:0008610	lipid biosynthetic process	-13.4344	shared	20	ACHE,AKT1,AKR1B1,ALOX5,CDK4,CREB1,CYP3A4,FASN,MTOR,HMGCR,INS,LPL,PIK3CA,PIK3CB,PIK3CG,PTEN,PTGIS,PTPN11,SOD1,TNF
18 Member	GO Biological Processes	GO:1901652	response to peptide	-14.1185	shared	18	AGT,AKT1,AKR1B1,CAT,CDK4,CREB1,F7,MTOR,IGF1,INS,INSR,PIK3CA,PPARA,PPARG,PTEN,PTPN11,TLR4,TP53
18 Member	GO Biological Processes	GO:1901699	cellular response to nitrogen compound	-17.6645	shared	23	AGT,AKT1,AKR1B1,CASP3,CDK4,CREB1,ESR1,MTOR,IGF1,INS,INSR,MMP2,PIK3CA,PIK3CG,PPARG,MAPK1,MAPK3,PTEN,PTPN11,SOD1,TLR4,TNF,TP53
18 Member	GO Biological Processes	GO:0071417	cellular response to organonitrogen compound	-18.0574	shared	22	AGT,AKT1,AKR1B1,CASP3,CDK4,CREB1,MTOR,IGF1,INS,INSR,MMP2,PIK3CA,PIK3CG,PPARG,MAPK1,MAPK3,PTEN,PTPN11,SOD1,TLR4,TNF,TP53
18 Member	GO Biological Processes	GO:0008286	insulin receptor signaling pathway	-4.2714	shared	5	AKT1,CDK4,INS,INSR,PIK3CA
18 Member	GO Biological Processes	GO:0033500	carbohydrate homeostasis	-5.09898	shared	7	AKT1,HMGCR,INS,INSR,PIK3CA,PPARG,PTPN11
18 Member	GO Biological Processes	GO:0043434	response to peptide hormone	-10.308	shared	14	AGT,AKT1,CAT,CDK4,CREB1,F7,MTOR,INS,INSR,PIK3CA,PPARA,PPARG,PTEN,PTPN11
18 Member	GO Biological Processes	GO:0048638	regulation of developmental growth	-9.29219	shared	12	AKT1,BCL2,CDK4,CREB1,MTOR,IGF1,INSR,PIK3CA,PTEN,PTPN11,SOD1,VEGFA
18 Member	GO Biological Processes	GO:0071375	cellular response to peptide hormone stimulus	-7.35075	shared	10	AGT,AKT1,CDK4,CREB1,INS,INSR,PIK3CA,PPARG,PTEN,PTPN11
18 Member	GO Biological Processes	GO:0035264	multicellular organism growth	-7.67417	candidate targets	8	BCL2,CDK4,CREB1,MTOR,IGF1,PIK3CA,PTPN11,SOD1
18 Member	GO Biological Processes	GO:0032869	cellular response to insulin stimulus	-7.68541	shared	9	AGT,AKT1,CDK4,INS,INSR,PIK3CA,PPARG,PTEN,PTPN11
18 Member	GO Biological Processes	GO:0040014	regulation of multicellular organism growth	-8.68734	candidate targets	7	BCL2,CDK4,CREB1,IGF1,PIK3CA,PTPN11,SOD1
18 Member	GO Biological Processes	GO:1901653	cellular response to peptide	-11.3205	shared	14	AGT,AKT1,AKR1B1,CDK4,CREB1,IGF1,INS,INSR,PIK3CA,PPARG,PTEN,PTPN11,TLR4,TP53
18 Member	GO Biological Processes	GO:0042593	glucose homeostasis	-5.11149	shared	7	AKT1,HMGCR,INS,INSR,PIK3CA,PPARG,PTPN11
18 Member	GO Biological Processes	GO:0032868	response to insulin	-10.4532	shared	12	AGT,AKT1,CAT,CDK4,MTOR,INS,INSR,PIK3CA,PPARA,PPARG,PTEN,PTPN11
19 Summary	negative regulation of cell proliferation
19 Member	GO Biological Processes	GO:0008285	negative regulation of cell proliferation	-8.88547	shared	16	ADORA2A,BCL2,CASP3,HMOX1,HRAS,IL6,JUN,NOS3,PLG,PPARG,PTEN,CCL2,SOD2,TNF,TP53,XDH
19 Member	GO Biological Processes	GO:0051402	neuron apoptotic process	-10.0639	shared	11	ADORA2A,BCL2,CASP3,HMOX1,HRAS,JUN,KRAS,PIK3CA,CCL2,SOD1,SOD2
19 Member	GO Biological Processes	GO:0043523	regulation of neuron apoptotic process	-10.6394	shared	11	ADORA2A,BCL2,CASP3,HMOX1,HRAS,JUN,KRAS,PIK3CA,CCL2,SOD1,SOD2
19 Member	GO Biological Processes	GO:0043524	negative regulation of neuron apoptotic process	-10.7561	shared	10	ADORA2A,BCL2,HMOX1,HRAS,JUN,KRAS,PIK3CA,CCL2,SOD1,SOD2
19 Member	GO Biological Processes	GO:2001233	regulation of apoptotic signaling pathway	-11.9082	shared	15	ADORA2A,AGT,AKT1,BCL2,HMOX1,IGF1,INS,NOS3,SERPINE1,MAPK8,PTEN,SOD1,SOD2,TNF,TP53
19 Member	GO Biological Processes	GO:1901215	negative regulation of neuron death	-13.5785	shared	13	ADORA2A,AKT1,BCL2,CREB1,HMOX1,HRAS,JUN,KRAS,PIK3CA,PPARA,CCL2,SOD1,SOD2
19 Member	GO Biological Processes	GO:0097193	intrinsic apoptotic signaling pathway	-8.75516	shared	11	AKT1,BCL2,CASP3,HMOX1,HRAS,INS,SOD1,SOD2,TNF,TP53,CYCS
19 Member	GO Biological Processes	GO:0097190	apoptotic signaling pathway	-16.233	shared	21	ADORA2A,AGT,AKT1,BCL2,CASP3,HMOX1,HRAS,IGF1,INS,JUN,NOS3,SERPINE1,MAPK8,PTEN,PTGIS,SOD1,SOD2,TLR4,TNF,TP53,CYCS
19 Member	GO Biological Processes	GO:1901214	regulation of neuron death	-18.1309	shared	18	ADORA2A,AKT1,BCL2,CASP3,CREB1,FOS,MTOR,HMOX1,HRAS,ITGB2,JUN,KRAS,PIK3CA,PPARA,CCL2,SOD1,SOD2,TLR4
19 Member	GO Biological Processes	GO:0043068	positive regulation of programmed cell death	-19.1685	shared	24	ADORA2A,AGT,AKT1,BCL2,CASP3,CDK4,CREB1,F3,HMGCR,HMOX1,IL6,JUN,PIK3CB,PPARG,MAPK8,PTEN,PTGIS,CCL2,SOD1,SOD2,TNF,TP53,XDH,CYCS
19 Member	GO Biological Processes	GO:0043065	positive regulation of apoptotic process	-19.2653	shared	24	ADORA2A,AGT,AKT1,BCL2,CASP3,CDK4,CREB1,F3,HMGCR,HMOX1,IL6,JUN,PIK3CB,PPARG,MAPK8,PTEN,PTGIS,CCL2,SOD1,SOD2,TNF,TP53,XDH,CYCS
19 Member	GO Biological Processes	GO:0010942	positive regulation of cell death	-23.4416	shared	28	ADORA2A,AGT,AKT1,BCL2,CASP3,CDK4,CREB1,F3,FOS,MTOR,HMGCR,HMOX1,IL6,ITGB2,JUN,PIK3CB,PPARG,MAPK8,PTEN,PTGIS,CCL2,SOD1,SOD2,TLR4,TNF,TP53,XDH,CYCS
19 Member	GO Biological Processes	GO:0070997	neuron death	-17.2243	shared	18	ADORA2A,AKT1,BCL2,CASP3,CREB1,FOS,MTOR,HMOX1,HRAS,ITGB2,JUN,KRAS,PIK3CA,PPARA,CCL2,SOD1,SOD2,TLR4
20 Summary	regulation of extrinsic apoptotic signaling pathway
20 Member	GO Biological Processes	GO:2001236	regulation of extrinsic apoptotic signaling pathway	-8.75416	shared	9	AGT,AKT1,BCL2,HMOX1,IGF1,NOS3,SERPINE1,PTEN,TNF
20 Member	GO Biological Processes	GO:0097191	extrinsic apoptotic signaling pathway	-8.70197	shared	10	AGT,AKT1,BCL2,CASP3,HMOX1,IGF1,NOS3,SERPINE1,PTEN,TNF
20 Member	GO Biological Processes	GO:2001234	negative regulation of apoptotic signaling pathway	-7.49217	shared	9	AKT1,BCL2,HMOX1,IGF1,INS,NOS3,SERPINE1,SOD2,TNF
20 Member	GO Biological Processes	GO:2001237	negative regulation of extrinsic apoptotic signaling pathway	-7.35725	shared	7	AKT1,BCL2,HMOX1,IGF1,NOS3,SERPINE1,TNF
20 Member	GO Biological Processes	GO:1904019	epithelial cell apoptotic process	-7.27238	shared	7	MTOR,HMOX1,IL6,SERPINE1,PIK3CG,CCL2,TNF
20 Member	GO Biological Processes	GO:1904035	regulation of epithelial cell apoptotic process	-5.09078	shared	5	MTOR,HMOX1,IL6,SERPINE1,CCL2
20 Member	GO Biological Processes	GO:1902041	regulation of extrinsic apoptotic signaling pathway via death domain receptors	-4.42381	candidate targets	4	HMOX1,NOS3,SERPINE1,PTEN
20 Member	GO Biological Processes	GO:1902042	negative regulation of extrinsic apoptotic signaling pathway via death domain receptors	-3.61798	candidate targets	3	HMOX1,NOS3,SERPINE1
20 Member	GO Biological Processes	GO:1904036	negative regulation of epithelial cell apoptotic process	-3.39907	candidate targets	3	MTOR,HMOX1,SERPINE1
20 Member	GO Biological Processes	GO:0008625	extrinsic apoptotic signaling pathway via death domain receptors	-6.58022	shared	6	BCL2,HMOX1,NOS3,SERPINE1,PTEN,TNF

## Sheet: GO Molecular Functions
The MF enrichment analysis for targets of WWQZS against hyperlipidemia
GroupID	Category	Term	Description	LogP	Belongs	Target Number	Gene Symbols
1 Summary	nuclear receptor activity
1 Member	GO Molecular Functions	GO:0004879	nuclear receptor activity	-9.63589	potential targets	7	ESR1,ESR2,PPARA,PPARG,RXRA,RXRB,RXRG
1 Member	GO Molecular Functions	GO:0098531	transcription factor activity, direct ligand regulated sequence-specific DNA binding	-9.63589	potential targets	7	ESR1,ESR2,PPARA,PPARG,RXRA,RXRB,RXRG
1 Member	GO Molecular Functions	GO:0003707	steroid hormone receptor activity	-9.21246	potential targets	7	ESR1,ESR2,PPARA,PPARG,RXRA,RXRB,RXRG
1 Member	GO Molecular Functions	GO:0004886	9-cis retinoic acid receptor activity	-8.02881	potential targets	3	RXRA,RXRB,RXRG
1 Member	GO Molecular Functions	GO:0003708	retinoic acid receptor activity	-6.48737	potential targets	3	RXRA,RXRB,RXRG
1 Member	GO Molecular Functions	GO:0031406	carboxylic acid binding	-4.33917	shared	6	NOS3,PPARA,PPARG,RXRA,SELE,SELP
1 Member	GO Molecular Functions	GO:0003713	transcription coactivator activity	-4.24605	shared	6	BIRC2,ESR2,JUN,PPARG,RXRA,RXRB
1 Member	GO Molecular Functions	GO:0043177	organic acid binding	-4.19658	shared	6	NOS3,PPARA,PPARG,RXRA,SELE,SELP
1 Member	GO Molecular Functions	GO:0003712	transcription coregulator activity	-3.79693	candidate targets	7	BIRC2,CREB1,ESR2,JUN,PPARG,RXRA,RXRB
1 Member	GO Molecular Functions	GO:0051427	hormone receptor binding	-3.19954	potential targets	4	ESR1,PPARG,PTPN11,RXRA
1 Member	GO Molecular Functions	GO:0035257	nuclear hormone receptor binding	-2.39193	potential targets	3	ESR1,PPARG,RXRA
2 Summary	protease binding
2 Member	GO Molecular Functions	GO:0002020	protease binding	-9.625	shared	9	BCL2,CASP3,DPP4,F3,INS,SERPINE1,PTEN,TNF,TP53
3 Summary	insulin receptor substrate binding
3 Member	GO Molecular Functions	GO:0043560	insulin receptor substrate binding	-8.20938	candidate targets	4	INSR,PIK3CA,PIK3CB,PTPN11
3 Member	GO Molecular Functions	GO:0052813	phosphatidylinositol bisphosphate kinase activity	-8.02963	candidate targets	6	EGF,ESR1,PIK3CA,PIK3CB,PIK3CG,PTPN11
3 Member	GO Molecular Functions	GO:0046934	phosphatidylinositol-4,5-bisphosphate 3-kinase activity	-8.14428	candidate targets	6	EGF,ESR1,PIK3CA,PIK3CB,PIK3CG,PTPN11
3 Member	GO Molecular Functions	GO:0016307	phosphatidylinositol phosphate kinase activity	-5.28918	candidate targets	3	PIK3CA,PIK3CB,PIK3CG
3 Member	GO Molecular Functions	GO:0035004	phosphatidylinositol 3-kinase activity	-7.84947	candidate targets	6	EGF,ESR1,PIK3CA,PIK3CB,PIK3CG,PTPN11
3 Member	GO Molecular Functions	GO:0052742	phosphatidylinositol kinase activity	-5.35762	candidate targets	4	PIK3CA,PIK3CB,PIK3CG,PTPN11
3 Member	GO Molecular Functions	GO:0016303	1-phosphatidylinositol-3-kinase activity	-5.65854	candidate targets	4	PIK3CA,PIK3CB,PIK3CG,PTPN11
3 Member	GO Molecular Functions	GO:0035005	1-phosphatidylinositol-4-phosphate 3-kinase activity	-6.48737	candidate targets	3	PIK3CA,PIK3CB,PIK3CG
4 Summary	protein domain specific binding
4 Member	GO Molecular Functions	GO:0019904	protein domain specific binding	-8.17915	candidate targets	15	BCL2,CALM1,CALM2,CALM3,MTOR,INSR,JUN,KRAS,PLG,PPARA,PPARG,PTEN,PTPN11,RXRA,TP53
4 Member	GO Molecular Functions	GO:0019900	kinase binding	-8.34705	candidate targets	13	AKT1,CALM1,CALM2,CALM3,ACE,ESR1,MTOR,INSR,ITGB2,MAPK1,PTEN,PTPN11,TP53
4 Member	GO Molecular Functions	GO:0019901	protein kinase binding	-8.91152	candidate targets	13	AKT1,CALM1,CALM2,CALM3,ACE,ESR1,MTOR,INSR,ITGB2,MAPK1,PTEN,PTPN11,TP53
5 Summary	protein phosphatase 2A binding
5 Member	GO Molecular Functions	GO:0051721	protein phosphatase 2A binding	-6.42836	candidate targets	4	AKT1,BCL2,HMGCR,TP53
5 Member	GO Molecular Functions	GO:0019902	phosphatase binding	-8.5635	shared	8	AKT1,BCL2,HMGCR,PPARG,MAPK1,MAPK3,SOD1,TP53
5 Member	GO Molecular Functions	GO:0019903	protein phosphatase binding	-6.63619	shared	6	AKT1,BCL2,HMGCR,PPARG,SOD1,TP53
6 Summary	tetrapyrrole binding
6 Member	GO Molecular Functions	GO:0046906	tetrapyrrole binding	-6.33536	shared	7	CAT,CYP3A4,HMOX1,NOS3,PTGIS,TPO,CYCS
6 Member	GO Molecular Functions	GO:0004497	monooxygenase activity	-2.34009	potential targets	3	CYP3A4,NOS3,PTGIS
6 Member	GO Molecular Functions	GO:0016705	oxidoreductase activity, acting on paired donors, with incorporation or reduction of molecular oxyge	-2.69506	potential targets	4	CYP3A4,HMOX1,NOS3,PTGIS
6 Member	GO Molecular Functions	GO:0005506	iron ion binding	-2.827	potential targets	4	ALOX5,CYP3A4,PTGIS,XDH
6 Member	GO Molecular Functions	GO:0048037	cofactor binding	-6.20473	potential targets	11	CAT,CYP3A4,FASN,HMGCR,HMOX1,NOS3,PTGIS,SOAT1,TPO,XDH,CYCS
6 Member	GO Molecular Functions	GO:0016491	oxidoreductase activity	-7.80243	shared	15	AKR1B1,ALOX5,CAT,CYP3A4,FASN,HMGCR,HMOX1,NOS3,PTGIS,SOD1,SOD2,TPO,VCAM1,XDH,CYCS
6 Member	GO Molecular Functions	GO:0020037	heme binding	-6.54775	shared	7	CAT,CYP3A4,HMOX1,NOS3,PTGIS,TPO,CYCS
7 Summary	serine-type peptidase activity
7 Member	GO Molecular Functions	GO:0008236	serine-type peptidase activity	-5.53456	shared	8	ACE,DPP4,F2,F3,F7,MMP2,PLAT,PLG
7 Member	GO Molecular Functions	GO:0004175	endopeptidase activity	-5.51467	shared	10	CASP3,ACE,DPP4,F2,F3,F7,MMP2,PLAT,PLG,REN
7 Member	GO Molecular Functions	GO:0017171	serine hydrolase activity	-6.54746	shared	9	ACHE,ACE,DPP4,F2,F3,F7,MMP2,PLAT,PLG
7 Member	GO Molecular Functions	GO:0070011	peptidase activity, acting on L-amino acid peptides	-4.1382	shared	10	CASP3,ACE,DPP4,F2,F3,F7,MMP2,PLAT,PLG,REN
7 Member	GO Molecular Functions	GO:0004252	serine-type endopeptidase activity	-4.77288	potential targets	7	DPP4,F2,F3,F7,MMP2,PLAT,PLG
7 Member	GO Molecular Functions	GO:0008233	peptidase activity	-4.00894	shared	10	CASP3,ACE,DPP4,F2,F3,F7,MMP2,PLAT,PLG,REN
8 Summary	amide binding
8 Member	GO Molecular Functions	GO:0033218	amide binding	-4.92198	potential targets	7	ACHE,FASN,INSR,ITGB2,PPARG,RXRA,SOAT1
8 Member	GO Molecular Functions	GO:0001540	amyloid-beta binding	-3.48989	potential targets	3	ACHE,INSR,ITGB2
8 Member	GO Molecular Functions	GO:0042277	peptide binding	-3.34129	potential targets	5	ACHE,INSR,ITGB2,PPARG,RXRA
9 Summary	insulin receptor binding
9 Member	GO Molecular Functions	GO:0005158	insulin receptor binding	-4.8538	candidate targets	3	IGF1,INS,PTPN11
9 Member	GO Molecular Functions	GO:0005179	hormone activity	-2.22718	candidate targets	3	AGT,IGF1,INS
9 Member	GO Molecular Functions	GO:0005159	insulin-like growth factor receptor binding	-7.47126	candidate targets	4	IGF1,INS,INSR,REN
10 Summary	steroid binding
10 Member	GO Molecular Functions	GO:0005496	steroid binding	-4.3938	potential targets	4	CYP3A4,ESR1,ESR2,SOAT1
10 Member	GO Molecular Functions	GO:0008289	lipid binding	-8.1048	shared	15	AKT1,CYP3A4,ESR1,ESR2,F2,F3,LPL,PON1,PPARA,PPARG,PTEN,RXRA,SELP,SOAT1,TLR4
11 Summary	protein phosphorylated amino acid binding
11 Member	GO Molecular Functions	GO:0045309	protein phosphorylated amino acid binding	-3.79369	candidate targets	3	MAPK1,MAPK3,PTPN11
11 Member	GO Molecular Functions	GO:0004712	protein serine/threonine/tyrosine kinase activity	-3.96378	candidate targets	3	AKT1,MAPK1,MAPK3
11 Member	GO Molecular Functions	GO:0004674	protein serine/threonine kinase activity	-5.01029	candidate targets	8	AKT1,MTOR,INSR,PIK3CA,PIK3CG,MAPK1,MAPK3,MAPK8
11 Member	GO Molecular Functions	GO:0001784	phosphotyrosine residue binding	-4.0584	candidate targets	3	MAPK1,MAPK3,PTPN11
11 Member	GO Molecular Functions	GO:0004707	MAP kinase activity	-5.47495	candidate targets	3	MAPK1,MAPK3,MAPK8
11 Member	GO Molecular Functions	GO:0004672	protein kinase activity	-5.9556	candidate targets	10	AKT1,EGF,MTOR,INSR,PIK3CA,PIK3CG,MAPK1,MAPK3,MAPK8,CCL2
11 Member	GO Molecular Functions	GO:0016773	phosphotransferase activity, alcohol group as acceptor	-9.14087	candidate targets	14	AKT1,CALM1,EGF,ESR1,MTOR,INSR,PIK3CA,PIK3CB,PIK3CG,MAPK1,MAPK3,MAPK8,PTPN11,CCL2
11 Member	GO Molecular Functions	GO:0051219	phosphoprotein binding	-5.16156	candidate targets	5	MTOR,PLAT,MAPK1,MAPK3,PTPN11
12 Summary	antioxidant activity
12 Member	GO Molecular Functions	GO:0016209	antioxidant activity	-3.7578	potential targets	4	CAT,SOD1,SOD2,TPO
13 Summary	chaperone binding
13 Member	GO Molecular Functions	GO:0051087	chaperone binding	-3.47034	candidate targets	4	BIRC2,PLG,SOD1,TP53
14 Summary	RNA polymerase II distal enhancer sequence-specific DNA binding
14 Member	GO Molecular Functions	GO:0000980	RNA polymerase II distal enhancer sequence-specific DNA binding	-2.93493	candidate targets	3	CREB1,JUN,TP53
14 Member	GO Molecular Functions	GO:0035326	enhancer binding	-2.59697	candidate targets	3	CREB1,JUN,TP53
14 Member	GO Molecular Functions	GO:0001085	RNA polymerase II transcription factor binding	-6.37654	candidate targets	7	CREB1,ESR1,FOS,JUN,PPARA,PPARG,TP53
14 Member	GO Molecular Functions	GO:0001077	proximal promoter DNA-binding transcription activator activity, RNA polymerase II-specific	-2.55012	candidate targets	5	CREB1,ESR1,FOS,JUN,PPARA
14 Member	GO Molecular Functions	GO:0000977	RNA polymerase II regulatory region sequence-specific DNA binding	-5.55548	shared	10	CREB1,ESR1,ESR2,FOS,JUN,PPARG,RXRA,RXRB,RXRG,TP53
14 Member	GO Molecular Functions	GO:0001012	RNA polymerase II regulatory region DNA binding	-5.53956	shared	10	CREB1,ESR1,ESR2,FOS,JUN,PPARG,RXRA,RXRB,RXRG,TP53
14 Member	GO Molecular Functions	GO:0000976	transcription regulatory region sequence-specific DNA binding	-5.26518	shared	10	CREB1,ESR1,ESR2,FOS,JUN,PPARG,RXRA,RXRB,RXRG,TP53
14 Member	GO Molecular Functions	GO:0046982	protein heterodimerization activity	-5.24005	shared	10	ADORA2A,BCL2,FOS,ITGB2,JUN,PPARG,RXRA,TLR4,TP53,VEGFA
14 Member	GO Molecular Functions	GO:0008134	transcription factor binding	-6.0958	candidate targets	10	BCL2,CREB1,ESR1,FOS,MTOR,JUN,PPARG,MAPK1,RXRA,TP53
14 Member	GO Molecular Functions	GO:0000987	proximal promoter sequence-specific DNA binding	-4.87364	candidate targets	8	CREB1,ESR1,ESR2,FOS,JUN,PPARG,RXRA,TP53
14 Member	GO Molecular Functions	GO:0033613	activating transcription factor binding	-4.66434	candidate targets	4	CREB1,FOS,JUN,PPARG
14 Member	GO Molecular Functions	GO:0001102	RNA polymerase II activating transcription factor binding	-3.82047	candidate targets	3	CREB1,FOS,JUN
14 Member	GO Molecular Functions	GO:0001228	DNA-binding transcription activator activity, RNA polymerase II-specific	-3.4627	candidate targets	6	CREB1,ESR1,FOS,JUN,RXRB,TP53
14 Member	GO Molecular Functions	GO:0000982	transcription factor activity, RNA polymerase II proximal promoter sequence-specific DNA binding	-3.40561	candidate targets	6	CREB1,ESR1,FOS,JUN,PPARG,TP53
14 Member	GO Molecular Functions	GO:0001158	enhancer sequence-specific DNA binding	-2.74259	candidate targets	3	CREB1,JUN,TP53
14 Member	GO Molecular Functions	GO:0000978	RNA polymerase II proximal promoter sequence-specific DNA binding	-4.98494	candidate targets	8	CREB1,ESR1,ESR2,FOS,JUN,PPARG,RXRA,TP53
15 Summary	G-protein coupled receptor binding
15 Member	GO Molecular Functions	GO:0001664	G-protein coupled receptor binding	-2.73052	candidate targets	5	ADORA2A,AGT,ACE,PTPN11,CCL2
16 Summary	channel regulator activity
16 Member	GO Molecular Functions	GO:0016247	channel regulator activity	-2.4678	candidate targets	3	BCL2,CALM1,CALM2
16 Member	GO Molecular Functions	GO:0047485	protein N-terminus binding	-5.47158	candidate targets	5	BIRC2,CALM1,CALM2,CALM3,TP53
16 Member	GO Molecular Functions	GO:0031432	titin binding	-5.47495	candidate targets	3	CALM1,CALM2,CALM3
16 Member	GO Molecular Functions	GO:0044325	ion channel binding	-2.6469	candidate targets	3	CALM1,CALM2,CALM3
16 Member	GO Molecular Functions	GO:0072542	protein phosphatase activator activity	-5.57903	candidate targets	3	CALM1,CALM2,CALM3
16 Member	GO Molecular Functions	GO:0008179	adenylate cyclase binding	-5.57903	candidate targets	3	CALM1,CALM2,CALM3
16 Member	GO Molecular Functions	GO:0019887	protein kinase regulator activity	-5.7007	candidate targets	7	CALM1,CALM2,CALM3,CASP3,CDK4,EGF,PIK3CA
16 Member	GO Molecular Functions	GO:0019209	kinase activator activity	-6.01842	candidate targets	5	CALM1,CALM2,CALM3,EGF,PIK3CA
16 Member	GO Molecular Functions	GO:0030295	protein kinase activator activity	-6.20985	candidate targets	5	CALM1,CALM2,CALM3,EGF,PIK3CA
16 Member	GO Molecular Functions	GO:0097718	disordered domain specific binding	-6.24382	candidate targets	4	CALM1,CALM2,CALM3,TP53
16 Member	GO Molecular Functions	GO:0031997	N-terminal myristoylation domain binding	-8.02881	candidate targets	3	CALM1,CALM2,CALM3
16 Member	GO Molecular Functions	GO:0019211	phosphatase activator activity	-5.28918	candidate targets	3	CALM1,CALM2,CALM3
16 Member	GO Molecular Functions	GO:0019207	kinase regulator activity	-5.28342	candidate targets	7	CALM1,CALM2,CALM3,CASP3,CDK4,EGF,PIK3CA
16 Member	GO Molecular Functions	GO:0005509	calcium ion binding	-4.09101	potential targets	10	CALM1,CALM2,CALM3,EGF,F2,F7,PON1,SELP,THBD,TPO
16 Member	GO Molecular Functions	GO:0019208	phosphatase regulator activity	-3.01601	candidate targets	3	CALM1,CALM2,CALM3
16 Member	GO Molecular Functions	GO:0019888	protein phosphatase regulator activity	-3.22984	candidate targets	3	CALM1,CALM2,CALM3
16 Member	GO Molecular Functions	GO:0016248	channel inhibitor activity	-4.0916	candidate targets	3	BCL2,CALM1,CALM2
16 Member	GO Molecular Functions	GO:0043539	protein serine/threonine kinase activator activity	-4.43806	candidate targets	3	CALM1,CALM2,CALM3
16 Member	GO Molecular Functions	GO:0008047	enzyme activator activity	-4.92873	candidate targets	8	CALM1,CALM2,CALM3,CASP3,EGF,JUN,PIK3CA,SOD1
17 Summary	glycosaminoglycan binding
17 Member	GO Molecular Functions	GO:0005539	glycosaminoglycan binding	-2.30126	potential targets	4	F2,LPL,SELP,VEGFA
17 Member	GO Molecular Functions	GO:1901681	sulfur compound binding	-2.97381	potential targets	5	F2,LPL,SELP,SOAT1,VEGFA
17 Member	GO Molecular Functions	GO:0008201	heparin binding	-2.74437	potential targets	4	F2,LPL,SELP,VEGFA
17 Member	GO Molecular Functions	GO:0001530	lipopolysaccharide binding	-4.31168	potential targets	3	F2,SELP,TLR4
18 Summary	cytokine activity
18 Member	GO Molecular Functions	GO:0005125	cytokine activity	-2.25132	potential targets	4	IL6,CCL2,TNF,VEGFA
18 Member	GO Molecular Functions	GO:0005126	cytokine receptor binding	-2.65457	potential targets	5	CASP3,IL6,CCL2,TNF,VEGFA
18 Member	GO Molecular Functions	GO:0048018	receptor ligand activity	-4.64942	shared	9	AGT,EGF,F2,IGF1,IL6,INS,CCL2,TNF,VEGFA
18 Member	GO Molecular Functions	GO:0008083	growth factor activity	-4.75695	shared	6	AGT,EGF,F2,IGF1,IL6,VEGFA
18 Member	GO Molecular Functions	GO:0030545	receptor regulator activity	-5.17298	shared	10	AGT,EGF,ESR2,F2,IGF1,IL6,INS,CCL2,TNF,VEGFA
19 Summary	enzyme inhibitor activity
19 Member	GO Molecular Functions	GO:0004857	enzyme inhibitor activity	-2.2212	candidate targets	5	AGT,BIRC2,BIRC3,CASP3,SERPINE1
19 Member	GO Molecular Functions	GO:0030414	peptidase inhibitor activity	-2.64741	candidate targets	4	AGT,BIRC2,BIRC3,SERPINE1
19 Member	GO Molecular Functions	GO:0004866	endopeptidase inhibitor activity	-2.73437	candidate targets	4	AGT,BIRC2,BIRC3,SERPINE1
19 Member	GO Molecular Functions	GO:0061134	peptidase regulator activity	-3.24842	candidate targets	5	AGT,BIRC2,BIRC3,CASP3,SERPINE1
19 Member	GO Molecular Functions	GO:0043028	cysteine-type endopeptidase regulator activity involved in apoptotic process	-4.0584	candidate targets	3	BIRC2,BIRC3,CASP3
19 Member	GO Molecular Functions	GO:0061135	endopeptidase regulator activity	-2.67581	candidate targets	4	AGT,BIRC2,BIRC3,SERPINE1
20 Summary	oxidoreductase activity, acting on the CH-OH group of donors, NAD or NADP as acceptor
20 Member	GO Molecular Functions	GO:0016616	oxidoreductase activity, acting on the CH-OH group of donors, NAD or NADP as acceptor	-2.15456	potential targets	3	AKR1B1,FASN,HMGCR
20 Member	GO Molecular Functions	GO:0016614	oxidoreductase activity, acting on CH-OH group of donors	-2.97229	potential targets	4	AKR1B1,FASN,HMGCR,XDH
20 Member	GO Molecular Functions	GO:0050662	coenzyme binding	-3.48111	potential targets	6	CAT,FASN,HMGCR,NOS3,SOAT1,XDH
20 Member	GO Molecular Functions	GO:0050661	NADP binding	-5.46423	potential targets	4	CAT,FASN,HMGCR,NOS3

## Sheet: GO Cellular Components
The CC enrichment analysis for targets of WWQZS against hyperlipidemia
GroupID	Category	Term	Description	LogP	Belongs	Target Number	Gene Symbols
1 Summary	membrane raft
1 Member	GO Cellular Components	GO:0045121	membrane raft	-11.9782	shared	14	BIRC2,BIRC3,CASP3,DPP4,HMOX1,INSR,ITGB2,KRAS,NOS3,MAPK1,MAPK3,PTGIS,SELE,TNF
1 Member	GO Cellular Components	GO:0098857	membrane microdomain	-11.9782	shared	14	BIRC2,BIRC3,CASP3,DPP4,HMOX1,INSR,ITGB2,KRAS,NOS3,MAPK1,MAPK3,PTGIS,SELE,TNF
1 Member	GO Cellular Components	GO:0098589	membrane region	-11.7694	shared	14	BIRC2,BIRC3,CASP3,DPP4,HMOX1,INSR,ITGB2,KRAS,NOS3,MAPK1,MAPK3,PTGIS,SELE,TNF
1 Member	GO Cellular Components	GO:0005901	caveola	-11.0083	shared	7	HMOX1,INSR,NOS3,MAPK1,MAPK3,PTGIS,SELE
1 Member	GO Cellular Components	GO:0044853	plasma membrane raft	-10.2437	shared	7	HMOX1,INSR,NOS3,MAPK1,MAPK3,PTGIS,SELE
2 Summary	external side of plasma membrane
2 Member	GO Cellular Components	GO:0009897	external side of plasma membrane	-6.59168	shared	10	ACE,F2,F3,INSR,ITGB2,PLG,SELP,TLR4,TNF,VCAM1
2 Member	GO Cellular Components	GO:0098552	side of membrane	-7.48863	shared	13	BIRC2,ACE,F2,F3,INSR,ITGB2,KRAS,PLG,PTEN,SELP,TLR4,TNF,VCAM1
3 Summary	platelet alpha granule
3 Member	GO Cellular Components	GO:0031091	platelet alpha granule	-6.27274	candidate targets	6	EGF,IGF1,SERPINE1,PLG,SELP,VEGFA
3 Member	GO Cellular Components	GO:0031093	platelet alpha granule lumen	-5.72847	candidate targets	4	EGF,IGF1,SERPINE1,PLG
3 Member	GO Cellular Components	GO:0031983	vesicle lumen	-7.95548	shared	8	ALOX5,CAT,EGF,IGF1,INS,SERPINE1,PLG,MAPK1
3 Member	GO Cellular Components	GO:0060205	cytoplasmic vesicle lumen	-7.96546	shared	8	ALOX5,CAT,EGF,IGF1,INS,SERPINE1,PLG,MAPK1
3 Member	GO Cellular Components	GO:0034774	secretory granule lumen	-8.14013	shared	8	ALOX5,CAT,EGF,IGF1,INS,SERPINE1,PLG,MAPK1
4 Summary	transcription factor complex
4 Member	GO Cellular Components	GO:0005667	transcription factor complex	-4.67205	candidate targets	8	CDK4,CREB1,FOS,JUN,PPARA,PPARG,RXRA,TP53
4 Member	GO Cellular Components	GO:0090575	RNA polymerase II transcription factor complex	-6.06332	candidate targets	7	CREB1,FOS,JUN,PPARA,PPARG,RXRA,TP53
4 Member	GO Cellular Components	GO:0044798	nuclear transcription factor complex	-5.42495	candidate targets	7	CREB1,FOS,JUN,PPARA,PPARG,RXRA,TP53
5 Summary	transferase complex, transferring phosphorus-containing groups
5 Member	GO Cellular Components	GO:0061695	transferase complex, transferring phosphorus-containing groups	-4.52288	candidate targets	5	INSR,PIK3CA,PIK3CB,PIK3CG,TP53
5 Member	GO Cellular Components	GO:0019898	extrinsic component of membrane	-3.29401	candidate targets	4	PIK3CA,PIK3CB,PIK3CG,PLG
5 Member	GO Cellular Components	GO:0005942	phosphatidylinositol 3-kinase complex	-5.21162	candidate targets	3	PIK3CA,PIK3CB,PIK3CG
6 Summary	extracellular matrix
6 Member	GO Cellular Components	GO:0031012	extracellular matrix	-3.86041	potential targets	7	F3,LPL,MMP2,SERPINE1,PLAT,SOD1,VEGFA
7 Summary	dendritic tree
7 Member	GO Cellular Components	GO:0097447	dendritic tree	-2.96626	candidate targets	5	MTOR,INSR,MAPK1,PTEN,SOD1
7 Member	GO Cellular Components	GO:0030425	dendrite	-2.9695	candidate targets	5	MTOR,INSR,MAPK1,PTEN,SOD1
7 Member	GO Cellular Components	GO:0016605	PML body	-3.51048	candidate targets	3	MTOR,PTEN,TP53
7 Member	GO Cellular Components	GO:0005773	vacuole	-4.24619	shared	7	CAT,ACE,EGF,MTOR,PIK3CG,MAPK1,SOD1
7 Member	GO Cellular Components	GO:0000323	lytic vacuole	-4.62151	shared	7	CAT,ACE,EGF,MTOR,PIK3CG,MAPK1,SOD1
7 Member	GO Cellular Components	GO:0005764	lysosome	-4.62565	shared	7	CAT,ACE,EGF,MTOR,PIK3CG,MAPK1,SOD1
8 Summary	microbody
8 Member	GO Cellular Components	GO:0042579	microbody	-2.96059	potential targets	4	CAT,HMGCR,SOD1,XDH
8 Member	GO Cellular Components	GO:0005777	peroxisome	-2.96059	potential targets	4	CAT,HMGCR,SOD1,XDH
8 Member	GO Cellular Components	GO:0031970	organelle envelope lumen	-3.77766	potential targets	4	ALOX5,CAT,SOD1,CYCS
9 Summary	blood microparticle
9 Member	GO Cellular Components	GO:0072562	blood microparticle	-2.85926	candidate targets	4	AGT,F2,PLG,PON1
10 Summary	apical part of cell
10 Member	GO Cellular Components	GO:0045177	apical part of cell	-2.84446	potential targets	6	DPP4,PLAT,PTEN,REN,VCAM1,MGAM
11 Summary	perinuclear region of cytoplasm
11 Member	GO Cellular Components	GO:0048471	perinuclear region of cytoplasm	-2.78979	potential targets	8	ACHE,AKR1B1,CDK4,HMOX1,HRAS,PPARG,SELE,TLR4
12 Summary	cell-substrate junction
12 Member	GO Cellular Components	GO:0030055	cell-substrate junction	-2.65998	candidate targets	6	CAT,DPP4,ITGB2,KRAS,MAPK1,MAPK3
12 Member	GO Cellular Components	GO:0101002	ficolin-1-rich granule	-3.45169	potential targets	5	ALOX5,CAT,ITGB2,MAPK1,MGAM
12 Member	GO Cellular Components	GO:0005769	early endosome	-2.96629	candidate targets	4	MAPK1,MAPK3,TLR4,VCAM1
12 Member	GO Cellular Components	GO:0005925	focal adhesion	-2.69757	candidate targets	6	CAT,DPP4,ITGB2,KRAS,MAPK1,MAPK3
12 Member	GO Cellular Components	GO:0005924	cell-substrate adherens junction	-2.68136	candidate targets	6	CAT,DPP4,ITGB2,KRAS,MAPK1,MAPK3
13 Summary	plasma membrane protein complex
13 Member	GO Cellular Components	GO:0098797	plasma membrane protein complex	-2.56744	candidate targets	7	BIRC2,CASP3,IGF1,IL6,INSR,ITGB2,VCAM1
13 Member	GO Cellular Components	GO:0043235	receptor complex	-3.52962	shared	7	BIRC2,EGF,IL6,INSR,ITGB2,RXRA,TLR4
13 Member	GO Cellular Components	GO:0098802	plasma membrane receptor complex	-2.48822	potential targets	4	BIRC2,IL6,INSR,ITGB2
14 Summary	cation channel complex
14 Member	GO Cellular Components	GO:0034703	cation channel complex	-2.56124	candidate targets	3	CALM1,CALM2,CALM3
14 Member	GO Cellular Components	GO:0043292	contractile fiber	-2.46112	candidate targets	3	CALM1,CALM2,CALM3
14 Member	GO Cellular Components	GO:0030016	myofibril	-2.53254	candidate targets	3	CALM1,CALM2,CALM3
14 Member	GO Cellular Components	GO:0044449	contractile fiber part	-2.55544	candidate targets	3	CALM1,CALM2,CALM3
14 Member	GO Cellular Components	GO:0030017	sarcomere	-2.65825	candidate targets	3	CALM1,CALM2,CALM3
14 Member	GO Cellular Components	GO:0005876	spindle microtubule	-4.24633	candidate targets	3	CALM1,CALM2,CALM3
14 Member	GO Cellular Components	GO:0005819	spindle	-3.02827	candidate targets	4	CALM1,CALM2,CALM3,MAPK1
14 Member	GO Cellular Components	GO:0034704	calcium channel complex	-4.09295	candidate targets	3	CALM1,CALM2,CALM3
14 Member	GO Cellular Components	GO:0000922	spindle pole	-2.95157	candidate targets	3	CALM1,CALM2,CALM3
15 Summary	Golgi lumen
15 Member	GO Cellular Components	GO:0005796	Golgi lumen	-2.32826	potential targets	3	F2,F7,INS
