# Supplementary material for: The Potential Mechanism of Wuwei Qingzhuo San against Hyperlipidemia Based on TCM Network Pharmacology and Validation Experiments in Hyperlipidemia Hamster
Source: Evid Based Complement Alternat Med. 2020 May 10;2020:5369025. doi: 10.1155/2020/5369025 (PMC7212318; doi:10.1155/2020/5369025)
Supplement: Supplementary Materials — include the following. Supplementary Table 1: information of compounds from five herbal medicines in WWQZS collected from public data resources and Information of candidate compounds of five herbal medicines in WWQZS after screening. Supplementary Table 2: the details of targets from compounds in Shiliu, Honghua, Bibo, Doukou, and Rougui. Supplementary Table 3: known hyperlipidemia-related targets. WWQZS shared 43 potential targets with known anti-hyperlipidemia targets. Supplementary Table 4: the degrees and betweennesses of nodes in 45 candidate targets network. Supplementary Table 5: the BP, MF, and CC enrichment analyses for targets of WWQZS against hyperlipidemia. Supplementary Table 6: the KEGG pathways enrichment analysis for targets of WWQZS against hyperlipidemia. [file 5369025.f1.zip › 5369025.f1/supplement table 6.xlsx]

## Sheet: Sheet1
The KEGG pathways enrichment analysis for targets of WWQZS against hyperlipidemia
Term	Description	LogP	Belongs	Target Number	Gene Symbols
hsa03320	PPAR signaling pathway	-7.17349	candidate targets	6	LPL,PPARA,PPARG,RXRA,RXRB,RXRG
hsa04060	Cytokine-cytokine receptor interaction	-2.93239	candidate targets	5	EGF,IL6,CCL2,TNF,VEGFA
hsa05143	African trypanosomiasis	-5.4852	candidate targets	4	IL6,SELE,TNF,VCAM1
hsa04146	Peroxisome	-3.98576	candidate targets	4	CAT,SOD1,SOD2,XDH
hsa04514	Cell adhesion molecules (CAMs)	-3.06186	candidate targets	4	ITGB2,SELE,SELP,VCAM1
hsa04976	Bile secretion	-2.9258	candidate targets	3	CYP3A4,HMGCR,RXRA
hsa04210	Apoptosis	-24.7006	potential targets	17	AKT1,BIRC2,BIRC3,BCL2,CASP3,FOS,HRAS,JUN,KRAS,PIK3CA,PIK3CB,MAPK1,MAPK3,MAPK8,TNF,TP53,CYCS
hsa05215	Prostate cancer	-24.0696	potential targets	15	AKT1,BCL2,CREB1,EGF,MTOR,HRAS,IGF1,INS,KRAS,PIK3CA,PIK3CB,MAPK1,MAPK3,PTEN,TP53
hsa05210	Colorectal cancer	-22.2434	potential targets	13	AKT1,BCL2,CASP3,FOS,JUN,KRAS,PIK3CA,PIK3CB,MAPK1,MAPK3,MAPK8,TP53,CYCS
hsa04071	Sphingolipid signaling pathway	-18.1556	potential targets	13	AKT1,BCL2,HRAS,KRAS,NOS3,PIK3CA,PIK3CB,MAPK1,MAPK3,MAPK8,PTEN,TNF,TP53
hsa05160	Hepatitis C	-17.5443	potential targets	13	AKT1,EGF,HRAS,KRAS,PIK3CA,PIK3CB,PPARA,MAPK1,MAPK3,MAPK8,RXRA,TNF,TP53
hsa04072	Phospholipase D signaling pathway	-16.9147	potential targets	13	AKT1,EGF,MTOR,HRAS,INS,INSR,KRAS,PIK3CA,PIK3CB,PIK3CG,MAPK1,MAPK3,PTPN11
hsa05214	Glioma	-26.7278	potential targets	16	AKT1,CALM1,CALM2,CALM3,CDK4,EGF,MTOR,HRAS,IGF1,KRAS,PIK3CA,PIK3CB,MAPK1,MAPK3,PTEN,TP53
hsa05231	Choline metabolism in cancer	-17.2775	potential targets	12	AKT1,EGF,FOS,MTOR,HRAS,JUN,KRAS,PIK3CA,PIK3CB,MAPK1,MAPK3,MAPK8
hsa04140	Autophagy - animal	-15.8892	potential targets	12	AKT1,BCL2,MTOR,HRAS,INS,KRAS,PIK3CA,PIK3CB,MAPK1,MAPK3,MAPK8,PTEN
hsa04010	MAPK signaling pathway	-12.273	potential targets	12	AKT1,CASP3,EGF,FOS,HRAS,JUN,KRAS,MAPK1,MAPK3,MAPK8,TNF,TP53
hsa04722	Neurotrophin signaling pathway	-20.2108	potential targets	15	AKT1,BCL2,CALM1,CALM2,CALM3,HRAS,JUN,KRAS,PIK3CA,PIK3CB,MAPK1,MAPK3,MAPK8,PTPN11,TP53
hsa04510	Focal adhesion	-16.7711	potential targets	15	AKT1,BIRC2,BIRC3,BCL2,EGF,HRAS,IGF1,JUN,PIK3CA,PIK3CB,MAPK1,MAPK3,MAPK8,PTEN,VEGFA
hsa01521	EGFR tyrosine kinase inhibitor resistance	-21.0635	potential targets	14	AKT1,BCL2,EGF,MTOR,HRAS,IGF1,IL6,KRAS,PIK3CA,PIK3CB,MAPK1,MAPK3,PTEN,VEGFA
hsa01524	Platinum drug resistance	-16.9419	potential targets	11	AKT1,BIRC2,BIRC3,BCL2,CASP3,PIK3CA,PIK3CB,MAPK1,MAPK3,TP53,CYCS
hsa04012	ErbB signaling pathway	-16.1143	potential targets	11	AKT1,EGF,MTOR,HRAS,JUN,KRAS,PIK3CA,PIK3CB,MAPK1,MAPK3,MAPK8
hsa04725	Cholinergic synapse	-14.802	potential targets	11	AKT1,BCL2,CREB1,FOS,HRAS,KRAS,PIK3CA,PIK3CB,PIK3CG,MAPK1,MAPK3
hsa04380	Osteoclast differentiation	-14.072	potential targets	11	AKT1,CREB1,FOS,JUN,PIK3CA,PIK3CB,PPARG,MAPK1,MAPK3,MAPK8,TNF
hsa04371	Apelin signaling pathway	-15.82	potential targets	13	AKT1,CALM1,CALM2,CALM3,MTOR,HRAS,KRAS,NOS3,SERPINE1,PIK3CG,PLAT,MAPK1,MAPK3
hsa05213	Endometrial cancer	-16.7429	potential targets	10	AKT1,EGF,HRAS,KRAS,PIK3CA,PIK3CB,MAPK1,MAPK3,PTEN,TP53
hsa05230	Central carbon metabolism in cancer	-15.513	potential targets	10	AKT1,MTOR,HRAS,KRAS,PIK3CA,PIK3CB,MAPK1,MAPK3,PTEN,TP53
hsa04024	cAMP signaling pathway	-14.5419	potential targets	14	ADORA2A,AKT1,CALM1,CALM2,CALM3,CREB1,FOS,JUN,PIK3CA,PIK3CB,PPARA,MAPK1,MAPK3,MAPK8
hsa05218	Melanoma	-17.9632	potential targets	12	AKT1,CDK4,EGF,HRAS,IGF1,KRAS,PIK3CA,PIK3CB,MAPK1,MAPK3,PTEN,TP53
hsa04662	B cell receptor signaling pathway	-13.1866	potential targets	9	AKT1,FOS,HRAS,JUN,KRAS,PIK3CA,PIK3CB,MAPK1,MAPK3
hsa04914	Progesterone-mediated oocyte maturation	-11.9648	potential targets	9	AKT1,IGF1,INS,KRAS,PIK3CA,PIK3CB,MAPK1,MAPK3,MAPK8
hsa05212	Pancreatic cancer	-16.4234	potential targets	11	AKT1,CDK4,EGF,KRAS,PIK3CA,PIK3CB,MAPK1,MAPK3,MAPK8,TP53,VEGFA
hsa04660	T cell receptor signaling pathway	-14.0331	potential targets	11	AKT1,CDK4,FOS,HRAS,JUN,KRAS,PIK3CA,PIK3CB,MAPK1,MAPK3,TNF
hsa04921	Oxytocin signaling pathway	-12.1113	potential targets	11	CALM1,CALM2,CALM3,FOS,HRAS,JUN,KRAS,NOS3,PIK3CG,MAPK1,MAPK3
hsa05203	Viral carcinogenesis	-10.816	potential targets	11	CASP3,CDK4,CREB1,HRAS,JUN,KRAS,PIK3CA,PIK3CB,MAPK1,MAPK3,TP53
hsa05206	MicroRNAs in cancer	-8.97501	potential targets	11	BCL2,CASP3,MTOR,HMOX1,HRAS,KRAS,PIK3CA,MAPK1,PTEN,TP53,VEGFA
hsa04960	Aldosterone-regulated sodium reabsorption	-13.7436	potential targets	8	IGF1,INS,INSR,KRAS,PIK3CA,PIK3CB,MAPK1,MAPK3
hsa05221	Acute myeloid leukemia	-12.2586	potential targets	8	AKT1,MTOR,HRAS,KRAS,PIK3CA,PIK3CB,MAPK1,MAPK3
hsa04550	Signaling pathways regulating pluripotency of stem cells	-8.9589	potential targets	8	AKT1,HRAS,IGF1,KRAS,PIK3CA,PIK3CB,MAPK1,MAPK3
hsa04062	Chemokine signaling pathway	-8.03406	potential targets	8	AKT1,HRAS,KRAS,PIK3CA,PIK3CB,MAPK1,MAPK3,CCL2
hsa05211	Renal cell carcinoma	-14.4415	potential targets	10	AKT1,HRAS,JUN,KRAS,PIK3CA,PIK3CB,MAPK1,MAPK3,PTPN11,VEGFA
hsa04664	Fc epsilon RI signaling pathway	-14.2338	potential targets	10	AKT1,ALOX5,HRAS,KRAS,PIK3CA,PIK3CB,MAPK1,MAPK3,MAPK8,TNF
hsa05220	Chronic myeloid leukemia	-14.0359	potential targets	10	AKT1,CDK4,HRAS,KRAS,PIK3CA,PIK3CB,MAPK1,MAPK3,PTPN11,TP53
hsa04912	GnRH signaling pathway	-12.8631	potential targets	10	CALM1,CALM2,CALM3,HRAS,JUN,KRAS,MMP2,MAPK1,MAPK3,MAPK8
hsa04650	Natural killer cell mediated cytotoxicity	-11.2334	potential targets	10	CASP3,HRAS,ITGB2,KRAS,PIK3CA,PIK3CB,MAPK1,MAPK3,PTPN11,TNF
hsa05219	Bladder cancer	-14.532	potential targets	9	CDK4,EGF,HRAS,KRAS,MMP2,MAPK1,MAPK3,TP53,VEGFA
hsa04370	VEGF signaling pathway	-12.9952	potential targets	9	AKT1,HRAS,KRAS,NOS3,PIK3CA,PIK3CB,MAPK1,MAPK3,VEGFA
hsa04261	Adrenergic signaling in cardiomyocytes	-9.42422	potential targets	9	AKT1,BCL2,CALM1,CALM2,CALM3,CREB1,PIK3CG,MAPK1,MAPK3
hsa05010	Alzheimer's disease	-8.76161	potential targets	9	CALM1,CALM2,CALM3,CASP3,LPL,MAPK1,MAPK3,TNF,CYCS
hsa04611	Platelet activation	-7.85177	potential targets	7	AKT1,NOS3,PIK3CA,PIK3CB,PIK3CG,MAPK1,MAPK3
hsa04360	Axon guidance	-6.79717	potential targets	7	HRAS,KRAS,PIK3CA,PIK3CB,MAPK1,MAPK3,PTPN11
hsa05016	Huntington's disease	-6.50842	potential targets	7	CASP3,CREB1,PPARG,SOD1,SOD2,TP53,CYCS
hsa05169	Epstein-Barr virus infection	-6.36017	potential targets	7	AKT1,BCL2,JUN,PIK3CA,PIK3CB,MAPK8,TP53
hsa05034	Alcoholism	-8.12736	potential targets	9	ADORA2A,CALM1,CALM2,CALM3,CREB1,HRAS,KRAS,MAPK1,MAPK3
hsa04916	Melanogenesis	-9.24385	potential targets	8	CALM1,CALM2,CALM3,CREB1,HRAS,KRAS,MAPK1,MAPK3
hsa04630	Jak-STAT signaling pathway	-7.74409	potential targets	8	AKT1,BCL2,MTOR,HRAS,IL6,PIK3CA,PIK3CB,PTPN11
hsa04215	Apoptosis - multiple species	-9.90525	potential targets	6	BIRC2,BIRC3,BCL2,CASP3,MAPK8,CYCS
hsa04924	Renin secretion	-9.0908	potential targets	7	AGT,CALM1,CALM2,CALM3,CREB1,ACE,REN
hsa04720	Long-term potentiation	-8.99618	potential targets	7	CALM1,CALM2,CALM3,HRAS,KRAS,MAPK1,MAPK3
hsa04115	p53 signaling pathway	-8.90454	potential targets	7	CASP3,CDK4,IGF1,SERPINE1,PTEN,TP53,CYCS
hsa05132	Salmonella infection	-8.22426	potential targets	7	FOS,IL6,JUN,MAPK1,MAPK3,MAPK8,TLR4
hsa04713	Circadian entrainment	-7.88824	potential targets	7	CALM1,CALM2,CALM3,CREB1,FOS,MAPK1,MAPK3
hsa04750	Inflammatory mediator regulation of TRP channels	-7.8567	potential targets	7	CALM1,CALM2,CALM3,IGF1,PIK3CA,PIK3CB,MAPK8
hsa04114	Oocyte meiosis	-7.11579	potential targets	7	CALM1,CALM2,CALM3,IGF1,INS,MAPK1,MAPK3
hsa04728	Dopaminergic synapse	-6.97461	potential targets	7	AKT1,CALM1,CALM2,CALM3,CREB1,FOS,MAPK8
hsa04923	Regulation of lipolysis in adipocytes	-6.79009	potential targets	5	AKT1,INS,INSR,PIK3CA,PIK3CB
hsa04730	Long-term depression	-6.55738	potential targets	5	HRAS,IGF1,KRAS,MAPK1,MAPK3
hsa04137	Mitophagy - animal	-6.38154	potential targets	5	HRAS,JUN,KRAS,MAPK8,TP53
hsa04540	Gap junction	-5.72304	potential targets	5	EGF,HRAS,KRAS,MAPK1,MAPK3
hsa04666	Fc gamma R-mediated phagocytosis	-5.65085	potential targets	5	AKT1,PIK3CA,PIK3CB,MAPK1,MAPK3
hsa04658	Th1 and Th2 cell differentiation	-5.62734	potential targets	5	FOS,JUN,MAPK1,MAPK3,MAPK8
hsa05031	Amphetamine addiction	-7.32408	potential targets	6	CALM1,CALM2,CALM3,CREB1,FOS,JUN
hsa04070	Phosphatidylinositol signaling system	-6.39728	potential targets	6	CALM1,CALM2,CALM3,PIK3CA,PIK3CB,PTEN
hsa04922	Glucagon signaling pathway	-6.24278	potential targets	6	AKT1,CALM1,CALM2,CALM3,CREB1,PPARA
hsa04726	Serotonergic synapse	-6.00547	potential targets	6	ALOX5,CASP3,HRAS,KRAS,MAPK1,MAPK3
hsa04670	Leukocyte transendothelial migration	-5.98298	potential targets	6	ITGB2,MMP2,PIK3CA,PIK3CB,PTPN11,VCAM1
hsa04270	Vascular smooth muscle contraction	-5.54549	potential targets	6	ADORA2A,CALM1,CALM2,CALM3,MAPK1,MAPK3
hsa05120	Epithelial cell signaling in Helicobacter pylori infection	-4.72232	potential targets	4	CASP3,JUN,MAPK8,PTPN11
hsa00562	Inositol phosphate metabolism	-4.64788	potential targets	4	PIK3CA,PIK3CB,PIK3CG,PTEN
hsa04020	Calcium signaling pathway	-3.48429	potential targets	5	ADORA2A,CALM1,CALM2,CALM3,NOS3
hsa04925	Aldosterone synthesis and secretion	-4.00626	potential targets	4	CALM1,CALM2,CALM3,CREB1
hsa04614	Renin-angiotensin system	-4.69261	potential targets	3	AGT,ACE,REN
hsa04320	Dorso-ventral axis formation	-4.42906	potential targets	3	KRAS,MAPK1,MAPK3
hsa05131	Shigellosis	-3.33049	potential targets	3	MAPK1,MAPK3,MAPK8
hsa04520	Adherens junction	-3.20022	potential targets	3	INSR,MAPK1,MAPK3
hsa04350	TGF-beta signaling pathway	-3.00527	potential targets	3	MAPK1,MAPK3,TNF
hsa04723	Retrograde endocannabinoid signaling	-2.77456	potential targets	3	MAPK1,MAPK3,MAPK8
hsa04310	Wnt signaling pathway	-2.34743	potential targets	3	JUN,MAPK8,TP53
hsa04973	Carbohydrate digestion and absorption	-4.88745	potential targets	4	AKT1,PIK3CA,PIK3CB,MGAM
hsa04744	Phototransduction	-4.1285	potential targets	3	CALM1,CALM2,CALM3
hsa04971	Gastric acid secretion	-2.85701	potential targets	3	CALM1,CALM2,CALM3
hsa04970	Salivary secretion	-2.63007	potential targets	3	CALM1,CALM2,CALM3
hsa05200	Pathways in cancer	-31.2422	shared	28	AKT1,BIRC2,BIRC3,BCL2,CASP3,CDK4,EGF,FOS,MTOR,HRAS,IGF1,IL6,JUN,KRAS,MMP2,PIK3CA,PIK3CB,PPARG,MAPK1,MAPK3,MAPK8,PTEN,RXRA,RXRB,RXRG,TP53,VEGFA,CYCS
hsa04933	AGE-RAGE signaling pathway in diabetic complications	-37.8857	shared	23	AKT1,BCL2,CASP3,CDK4,F3,HRAS,IL6,JUN,KRAS,MMP2,NOS3,SERPINE1,PIK3CA,PIK3CB,MAPK1,MAPK3,MAPK8,CCL2,SELE,THBD,TNF,VCAM1,VEGFA
hsa04151	PI3K-Akt signaling pathway	-24.8238	shared	23	AKT1,BCL2,CDK4,CREB1,EGF,MTOR,HRAS,IGF1,IL6,INS,INSR,KRAS,NOS3,PIK3CA,PIK3CB,PIK3CG,MAPK1,MAPK3,PTEN,RXRA,TLR4,TP53,VEGFA
hsa05418	Fluid shear stress and atherosclerosis	-29.9969	shared	21	AKT1,BCL2,CALM1,CALM2,CALM3,FOS,HMOX1,JUN,MMP2,NOS3,PIK3CA,PIK3CB,PLAT,MAPK8,CCL2,SELE,THBD,TNF,TP53,VCAM1,VEGFA
hsa05224	Breast cancer	-22.464	shared	16	AKT1,EGF,ESR1,ESR2,FOS,MTOR,HRAS,IGF1,JUN,KRAS,PIK3CA,PIK3CB,MAPK1,MAPK3,PTEN,TP53
hsa05205	Proteoglycans in cancer	-20.0055	shared	16	AKT1,CASP3,ESR1,MTOR,HRAS,IGF1,KRAS,MMP2,PIK3CA,PIK3CB,MAPK1,MAPK3,PTPN11,TLR4,TNF,TP53
hsa05161	Hepatitis B	-27.9504	shared	20	AKT1,BCL2,CASP3,CDK4,CREB1,FOS,HRAS,IL6,JUN,KRAS,PIK3CA,PIK3CB,MAPK1,MAPK3,MAPK8,PTEN,TLR4,TNF,TP53,CYCS
hsa01522	Endocrine resistance	-27.6146	shared	18	AKT1,BCL2,CDK4,ESR1,ESR2,FOS,MTOR,HRAS,IGF1,JUN,KRAS,MMP2,PIK3CA,PIK3CB,MAPK1,MAPK3,MAPK8,TP53
hsa04211	Longevity regulating pathway	-21.8463	shared	14	AKT1,CAT,CREB1,MTOR,HRAS,IGF1,INS,INSR,KRAS,PIK3CA,PIK3CB,PPARG,SOD2,TP53
hsa04915	Estrogen signaling pathway	-25.4359	shared	17	AKT1,CALM1,CALM2,CALM3,CREB1,ESR1,ESR2,FOS,HRAS,JUN,KRAS,MMP2,NOS3,PIK3CA,PIK3CB,MAPK1,MAPK3
hsa04066	HIF-1 signaling pathway	-25.1958	shared	17	AKT1,BCL2,EGF,MTOR,HMOX1,IGF1,IL6,INS,INSR,NOS3,SERPINE1,PIK3CA,PIK3CB,MAPK1,MAPK3,TLR4,VEGFA
hsa04668	TNF signaling pathway	-24.6649	shared	17	AKT1,BIRC2,BIRC3,CASP3,CREB1,FOS,IL6,JUN,PIK3CA,PIK3CB,MAPK1,MAPK3,MAPK8,CCL2,SELE,TNF,VCAM1
hsa04014	Ras signaling pathway	-18.9782	shared	17	AKT1,CALM1,CALM2,CALM3,EGF,HRAS,IGF1,INS,INSR,KRAS,PIK3CA,PIK3CB,MAPK1,MAPK3,MAPK8,PTPN11,VEGFA
hsa04919	Thyroid hormone signaling pathway	-18.2561	shared	13	AKT1,ESR1,MTOR,HRAS,KRAS,PIK3CA,PIK3CB,MAPK1,MAPK3,RXRA,RXRB,RXRG,TP53
hsa04150	mTOR signaling pathway	-16.72	shared	13	AKT1,MTOR,HRAS,IGF1,INS,INSR,KRAS,PIK3CA,PIK3CB,MAPK1,MAPK3,PTEN,TNF
hsa04068	FoxO signaling pathway	-21.2818	shared	16	AKT1,CAT,EGF,HRAS,IGF1,IL6,INS,INSR,KRAS,PIK3CA,PIK3CB,MAPK1,MAPK3,MAPK8,PTEN,SOD2
hsa04015	Rap1 signaling pathway	-18.6574	shared	17	ADORA2A,AKT1,CALM1,CALM2,CALM3,EGF,HRAS,IGF1,INS,INSR,ITGB2,KRAS,PIK3CA,PIK3CB,MAPK1,MAPK3,VEGFA
hsa04213	Longevity regulating pathway - multiple species	-19.882	shared	12	AKT1,CAT,MTOR,HRAS,IGF1,INS,INSR,KRAS,PIK3CA,PIK3CB,SOD1,SOD2
hsa04917	Prolactin signaling pathway	-19.1954	shared	12	AKT1,ESR1,ESR2,FOS,HRAS,INS,KRAS,PIK3CA,PIK3CB,MAPK1,MAPK3,MAPK8
hsa04910	Insulin signaling pathway	-19.2064	shared	15	AKT1,CALM1,CALM2,CALM3,FASN,MTOR,HRAS,INS,INSR,KRAS,PIK3CA,PIK3CB,MAPK1,MAPK3,MAPK8
hsa05152	Tuberculosis	-17.4694	shared	15	AKT1,BCL2,CALM1,CALM2,CALM3,CASP3,CREB1,IL6,ITGB2,MAPK1,MAPK3,MAPK8,TLR4,TNF,CYCS
hsa05166	HTLV-I infection	-15.1303	shared	15	AKT1,CDK4,CREB1,FOS,HRAS,IL6,ITGB2,JUN,KRAS,PIK3CA,PIK3CB,MAPK8,TNF,TP53,VCAM1
hsa05142	Chagas disease (American trypanosomiasis)	-19.406	shared	14	AKT1,ACE,FOS,IL6,JUN,SERPINE1,PIK3CA,PIK3CB,MAPK1,MAPK3,MAPK8,CCL2,TLR4,TNF
hsa04931	Insulin resistance	-19.0999	shared	14	AKT1,CREB1,MTOR,IL6,INS,INSR,NOS3,PIK3CA,PIK3CB,PPARA,MAPK8,PTEN,PTPN11,TNF
hsa05223	Non-small cell lung cancer	-21.0152	shared	13	AKT1,CDK4,EGF,HRAS,KRAS,PIK3CA,PIK3CB,MAPK1,MAPK3,RXRA,RXRB,RXRG,TP53
hsa05133	Pertussis	-19.3476	shared	13	CALM1,CALM2,CALM3,CASP3,FOS,IL6,ITGB2,JUN,MAPK1,MAPK3,MAPK8,TLR4,TNF
hsa05222	Small cell lung cancer	-18.7427	shared	13	AKT1,BIRC2,BIRC3,BCL2,CDK4,PIK3CA,PIK3CB,PTEN,RXRA,RXRB,RXRG,TP53,CYCS
hsa05145	Toxoplasmosis	-16.9827	shared	13	AKT1,ALOX5,BIRC2,BIRC3,BCL2,CASP3,PIK3CG,MAPK1,MAPK3,MAPK8,TLR4,TNF,CYCS
hsa04932	Non-alcoholic fatty liver disease (NAFLD)	-15.3783	shared	13	AKT1,CASP3,IL6,INS,INSR,JUN,PIK3CA,PIK3CB,PPARA,MAPK8,RXRA,TNF,CYCS
hsa05164	Influenza A	-14.5249	shared	13	AKT1,IL6,JUN,PIK3CA,PIK3CB,PLG,MAPK1,MAPK3,MAPK8,CCL2,TLR4,TNF,CYCS
hsa05216	Thyroid cancer	-17.0261	shared	9	HRAS,KRAS,PPARG,MAPK1,MAPK3,RXRA,RXRB,RXRG,TP53
hsa04930	Type II diabetes mellitus	-14.9976	shared	9	MTOR,INS,INSR,PIK3CA,PIK3CB,MAPK1,MAPK3,MAPK8,TNF
hsa04920	Adipocytokine signaling pathway	-13.3037	shared	9	AKT1,MTOR,PPARA,MAPK8,PTPN11,RXRA,RXRB,RXRG,TNF
hsa04620	Toll-like receptor signaling pathway	-13.9855	shared	11	AKT1,FOS,IL6,JUN,PIK3CA,PIK3CB,MAPK1,MAPK3,MAPK8,TLR4,TNF
hsa04152	AMPK signaling pathway	-13.2445	shared	11	AKT1,CREB1,FASN,MTOR,HMGCR,IGF1,INS,INSR,PIK3CA,PIK3CB,PPARG
hsa04022	cGMP-PKG signaling pathway	-11.8087	shared	11	AKT1,CALM1,CALM2,CALM3,CREB1,INS,INSR,NOS3,PIK3CG,MAPK1,MAPK3
hsa04621	NOD-like receptor signaling pathway	-11.6083	shared	11	BIRC2,BIRC3,BCL2,IL6,JUN,MAPK1,MAPK3,MAPK8,CCL2,TLR4,TNF
hsa04659	Th17 cell differentiation	-12.1901	shared	10	FOS,MTOR,IL6,JUN,MAPK1,MAPK3,MAPK8,RXRA,RXRB,RXRG
hsa05168	Herpes simplex infection	-9.80857	shared	10	CASP3,FOS,IL6,JUN,MAPK8,PTPN11,CCL2,TNF,TP53,CYCS
hsa04810	Regulation of actin cytoskeleton	-9.22977	shared	10	EGF,F2,HRAS,INS,ITGB2,KRAS,PIK3CA,PIK3CB,MAPK1,MAPK3
hsa04657	IL-17 signaling pathway	-11.1451	shared	9	CASP3,FOS,IL6,JUN,MAPK1,MAPK3,MAPK8,CCL2,TNF
hsa05202	Transcriptional misregulation in cancer	-8.56536	shared	9	BIRC3,IGF1,IL6,PLAT,PPARG,RXRA,RXRB,RXRG,TP53
hsa05014	Amyotrophic lateral sclerosis (ALS)	-10.5842	shared	7	BCL2,CASP3,CAT,SOD1,TNF,TP53,CYCS
hsa05144	Malaria	-11.8433	shared	8	IL6,ITGB2,CCL2,SELE,SELP,TLR4,TNF,VCAM1
hsa04610	Complement and coagulation cascades	-10.111	shared	8	F2,F3,F7,ITGB2,SERPINE1,PLAT,PLG,THBD
hsa05323	Rheumatoid arthritis	-9.64903	shared	8	FOS,IL6,ITGB2,JUN,CCL2,TLR4,TNF,VEGFA
hsa04064	NF-kappa B signaling pathway	-7.05825	shared	6	BIRC2,BIRC3,BCL2,TLR4,TNF,VCAM1
hsa05140	Leishmaniasis	-8.7295	shared	7	FOS,ITGB2,JUN,MAPK1,MAPK3,TLR4,TNF
hsa05146	Amoebiasis	-7.88824	shared	7	CASP3,IL6,ITGB2,PIK3CA,PIK3CB,TLR4,TNF
hsa05162	Measles	-6.88431	shared	7	AKT1,CDK4,IL6,PIK3CA,PIK3CB,TLR4,TP53
hsa05134	Legionellosis	-7.88815	shared	6	CASP3,IL6,ITGB2,TLR4,TNF,CYCS
hsa04913	Ovarian steroidogenesis	-4.85624	shared	4	ALOX5,IGF1,INS,INSR
hsa05321	Inflammatory bowel disease (IBD)	-4.40224	shared	4	IL6,JUN,TLR4,TNF
hsa05410	Hypertrophic cardiomyopathy (HCM)	-3.98576	shared	4	ACE,IGF1,IL6,TNF
